# Supplementary material for: The histone deacetylase complex MiDAC regulates a neurodevelopmental gene expression program to control neurite outgrowth
Source: eLife. 2020 Apr 16;9:e57519. doi: 10.7554/eLife.57519 (PMC7192582; doi:10.7554/eLife.57519)
Supplement: Supplementary file 2. [file elife-57519-supp2.xlsx]

## Sheet: Index
	Sheet 1: All in Dnttip1 KO versus WT (no fold change and p-value cut-off)
	Sheet 2 Up in Dnttip1 KO vs WT (FC≥1.5; p<0.01)
	Sheet 3: Down in Dnttip1 KO vs WT (FC≤-1.5; p<0.01)
	Sheet 4: Neural up in Dnttip1 KO vs WT (FC≥1.5; p<0.01)
	Sheet 5: Neural down in Dnttip1 KO vs WT (FC≤-1.5; p<0.01)
	Sheet 6: All in Elmsan1 KO versus WT (no fold change and p-value cut-off)
	Sheet 7 Up in Elmsan1 KO vs WT (FC≥1.5; p<0.01)
	Sheet 8: Down in Elmsan1 KO vs WT (FC≤-1.5; p<0.01)
	Sheet 9: Neural up in Elmsan1 KO vs WT (FC≥1.5; p<0.01)
	Sheet 10: Neural down in Elmsan1 KO vs WT (FC≤-1.5; p<0.01)

## Sheet: All in Dnttip1 KO vs WT
Gene	log2FC	AveExpr	T.Value	P.Value
0610005C13Rik	0.827757	1.15852	1.99095	0.0917391
0610007C21Rik	0.205331	4.6213	1.45768	0.193328
0610007L01Rik	0.0317592	6.97905	0.685609	0.5176
0610007N19Rik	0.310969	2.40116	1.29842	0.240048
0610007P08Rik	0.119965	5.49541	1.66826	0.144381
0610007P14Rik	0.00515253	5.28499	0.0795998	0.939046
0610007P22Rik	0.0635794	4.67072	0.768283	0.470376
0610009B22Rik	-0.0506746	4.18255	-0.512905	0.625659
0610009D07Rik	-0.281602	5.39286	-1.90007	0.104269
0610009O20Rik	-0.146432	5.30921	-1.25977	0.252802
0610010F05Rik	-0.662884	4.55729	-2.58453	0.0400635
0610010O12Rik	0.0491396	3.51683	0.233046	0.82318
0610011F06Rik	-0.122313	3.20976	-0.515919	0.62367
0610011L14Rik	-0.138346	5.39275	-2.32608	0.0573063
0610012G03Rik	0.117042	4.6038	1.54983	0.170253
0610030E20Rik	0.213618	4.34436	0.602372	0.568149
0610031J06Rik	-0.0433463	6.15256	-0.217423	0.834812
0610037L13Rik	0.136765	5.02481	2.24242	0.0644181
0610037P05Rik	-0.117345	4.65533	-1.42565	0.202001
0610043K17Rik	-0.196827	0.428716	-0.797311	0.454521
0910001L09Rik	-0.0698108	4.29529	-0.761671	0.474041
1110001A16Rik	-0.0742915	4.81217	-0.912379	0.395437
1110001J03Rik	0.010278	3.9114	0.0546111	0.958154
1110002B05Rik	-0.225714	5.02796	-2.24552	0.0641381
1110002J07Rik	-0.0885557	0.5583	-0.152414	0.883668
1110002L01Rik	-0.158612	3.40948	-1.06001	0.328421
1110002N22Rik	-0.323903	4.45586	-2.99923	0.0229009
1110003E01Rik	-0.0654562	4.85044	-0.250081	0.810552
1110004E09Rik	-0.0488797	4.15423	-0.667341	0.52844
1110004F10Rik	-0.136705	6.61731	-2.3725	0.0537157
1110005A03Rik	-0.244247	4.07259	-3.01305	0.0224865
1110007C09Rik	0.19475	2.1162	0.659124	0.533363
1110008F13Rik	-0.0805476	5.92389	-1.23567	0.261053
1110008J03Rik	0.12708	3.39311	0.991617	0.358252
1110008L16Rik	-0.227554	5.31721	-3.73737	0.00897855
1110008P14Rik	0.0801595	2.9894	0.819056	0.442894
1110012J17Rik	-0.261446	6.20856	-2.52987	0.0431922
1110012L19Rik	-0.0657981	4.08324	-0.853015	0.425166
1110014N23Rik	0.0847053	4.49623	0.491638	0.639784
1110018G07Rik	-0.0377783	5.63099	-0.605422	0.566245
1110018J18Rik	-0.149658	4.15588	-1.07908	0.32047
1110019D14Rik	0.336723	2.95355	3.07112	0.0208317
1110020G09Rik	-0.360883	6.58215	-4.90318	0.00241792
1110021J02Rik	0.0839881	2.78328	0.75809	0.476034
1110021L09Rik	0.0226945	3.34247	0.222404	0.831098
1110028C15Rik	-0.0889695	2.08364	-0.798079	0.454107
1110031I02Rik	0.0366223	3.08768	0.259805	0.803372
1110032A03Rik	-0.220022	1.49821	-0.986374	0.360625
1110032F04Rik	-0.101419	0.301248	-0.242553	0.816125
1110034A24Rik	-0.0137516	4.58765	-0.103334	0.920938
1110034B05Rik	-0.283238	4.1147	-3.08885	0.0203531
1110034G24Rik	-0.132657	2.59207	-0.854096	0.42461
1110037F02Rik	0.094709	6.78948	1.56365	0.167022
1110038B12Rik	0.0943937	6.77413	0.861208	0.420967
1110038D17Rik	0.0423548	4.33268	0.494607	0.637802
1110038F14Rik	-0.038462	4.24965	-0.514926	0.624325
1110049F12Rik	-0.119489	5.35926	-0.807977	0.448791
1110051M20Rik	-0.51859	3.39287	-3.0542	0.0212998
1110054O05Rik	-0.0601318	5.54869	-0.838768	0.432539
1110057K04Rik	-0.337598	5.03416	-4.98935	0.00221155
1110058L19Rik	-0.146332	3.03998	-0.894937	0.404006
1110059E24Rik	-0.0610774	5.44238	-0.946698	0.378983
1110059G10Rik	-0.137896	3.10063	-1.58179	0.162869
1110065P20Rik	-0.1615	2.76711	-1.32731	0.230887
1110067D22Rik	-0.22027	5.1496	-3.02656	0.0220893
1190002H23Rik	0.935722	2.7883	2.87162	0.0271395
1190002N15Rik	-0.283979	5.17393	-3.38227	0.0139454
1190003J15Rik	-0.246403	2.27339	-1.52675	0.175779
1190005F20Rik	-0.163293	4.74751	-1.34134	0.226551
1190005I06Rik	0.273658	1.79672	1.45671	0.193584
1190007F08Rik	0.404641	0.483781	0.943979	0.380267
1190007I07Rik	0.0151994	3.41121	0.11073	0.915306
1200011I18Rik	-0.0848078	5.98602	-1.24711	0.257108
1200011M11Rik	-0.00117299	5.49231	-0.0182127	0.986037
1200014J11Rik	0.106366	6.67682	2.19185	0.0691511
1200016B10Rik	-0.156252	6.48865	-1.31607	0.234413
1300001I01Rik	0.175784	7.61527	2.79693	0.0300052
1300002E11Rik	0.141969	3.53174	0.768347	0.470341
1300002K09Rik	0.0536585	0.281622	0.15724	0.880019
1300010F03Rik	-0.188601	4.88391	-1.61183	0.156206
1300014I06Rik	1.69152	-0.60585	2.13333	0.0750764
1300018I17Rik	0.717725	3.71381	5.33383	0.00156343
1300018J18Rik	0.326992	1.93943	1.44736	0.196085
1500001M20Rik	0.139563	6.01158	1.36222	0.220233
1500002O20Rik	0.104065	5.33349	0.473604	0.651893
1500003O03Rik	-0.0419762	5.3647	-0.245583	0.813881
1500009L16Rik	-0.630163	2.26616	-3.72048	0.00916461
1500010J02Rik	-0.10909	6.76715	-1.10598	0.309526
1500011B03Rik	-0.258552	2.5968	-2.01784	0.0883283
1500011H22Rik	-0.393171	4.09562	-3.95399	0.00692902
1500011K16Rik	0.0704176	2.87841	0.47017	0.654212
1500012F01Rik	0.0951101	6.62562	1.8423	0.113104
1500031L02Rik	-0.245656	4.30719	-2.9319	0.0250409
1500032L24Rik	-0.169895	5.26015	-2.2593	0.0629126
1520401A03Rik	1.59305	-0.200593	3.02234	0.0222126
1520402A15Rik	-0.289545	1.81871	-0.964387	0.370711
1600002H07Rik	0.245506	4.96105	3.65579	0.00991739
1600002K03Rik	-0.287993	2.30652	-2.72521	0.0330629
1600012F09Rik	0.18224	4.95422	1.12698	0.3012
1600012H06Rik	-0.102492	4.49009	-0.965087	0.370386
1600014C10Rik	0.109924	2.56096	0.839016	0.43241
1600016N20Rik	0.684608	2.36172	5.12794	0.00191994
1600020E01Rik	0.156042	3.99229	0.559689	0.59519
1600021P15Rik	-0.172839	4.36951	-2.65696	0.0362813
1600027N09Rik	0.160033	4.72577	1.63845	0.150517
1600029D21Rik	1.03855	4.44199	4.86075	0.00252746
1700001L05Rik	0.132574	3.93652	1.07223	0.323309
1700001P01Rik	0.757767	1.22162	0.985576	0.360987
1700003M02Rik	-0.820792	0.6589	-0.858826	0.422185
1700007K13Rik	-0.0325643	3.30174	-0.129998	0.900656
1700007L15Rik	0.0990026	1.12689	0.443304	0.672498
1700008O03Rik	-0.0276513	0.964263	-0.148458	0.886661
1700010I14Rik	-1.0038	0.124675	-4.10798	0.00578845
1700011J10Rik	0.0307571	0.997862	0.161749	0.876613
1700012A16Rik	1.09485	0.730508	4.25773	0.00487638
1700012B15Rik	-0.0951393	2.50484	-0.66985	0.526942
1700016D06Rik	1.03949	-0.412497	1.96652	0.0949507
1700016M24Rik	0.811487	-0.722554	1.13367	0.298587
1700017B05Rik	0.325784	5.11385	3.11477	0.0196747
1700019D03Rik	-0.061897	6.51965	-0.224776	0.829332
1700019E19Rik	-0.269984	2.8174	-1.28098	0.24573
1700019G17Rik	-0.675707	0.531703	-2.18129	0.0701845
1700019N12Rik	0.720144	-0.323495	1.77088	0.125048
1700020I14Rik	-0.131354	6.92803	-2.39302	0.0522038
1700020O03Rik	0.040984	4.38298	0.226015	0.828409
1700021C14Rik	-0.188007	0.904955	-0.801513	0.452257
1700021F05Rik	0.00679454	4.20611	0.0685408	0.947498
1700021K19Rik	0.0248353	4.08953	0.309384	0.767098
1700023L04Rik	0.750572	1.03872	4.06557	0.00608018
1700024B05Rik	-1.32484	0.885371	-1.4077	0.207016
1700025G04Rik	0.262621	3.29428	2.88178	0.0267729
1700025K23Rik	0.323193	0.575262	1.26369	0.251481
1700029F09Rik	-0.256498	4.22703	-2.18775	0.0695506
1700029G01Rik	0.31548	3.02467	0.984959	0.361268
1700029I01Rik	0.0574424	6.62884	0.224928	0.829218
1700029P11Rik	-0.0950268	1.45506	-0.365096	0.727092
1700030C10Rik	0.480338	3.51561	0.659226	0.533302
1700030J22Rik	0.401647	1.68625	1.41317	0.205475
1700030K09Rik	0.253717	3.56674	1.62402	0.153576
1700034H14Rik	-0.965029	3.35158	-10.441	3.4965e-05
1700037H04Rik	-0.231963	4.63759	-1.72716	0.132958
1700040I03Rik	0.105994	3.8092	0.338682	0.745953
1700042O10Rik	0.0341256	1.38916	0.148924	0.886309
1700047I17Rik2	-0.501306	2.322	-3.38965	0.0138156
1700048O20Rik	-3.57995	-1.96112	-5.56545	0.00124886
1700049G17Rik	0.145529	2.62403	0.896705	0.40313
1700052N19Rik	-0.0137344	5.72505	-0.246555	0.813161
1700054N08Rik	0.232113	3.56979	1.81117	0.118166
1700056N10Rik	0.616463	-0.186209	2.16354	0.0719551
1700061G19Rik	0.205603	6.22726	1.56361	0.167031
1700066B19Rik	1.14984	0.652432	5.88554	0.000925407
1700066M21Rik	0.143452	4.57543	1.53828	0.172997
1700067K01Rik	0.443937	0.252973	1.2095	0.270276
1700081L11Rik	0.0125482	6.46596	0.278664	0.789505
1700086O06Rik	0.224325	0.239797	1.00379	0.352789
1700086P04Rik	1.10243	-0.312422	5.03603	0.00210807
1700094D03Rik	0.143292	1.89666	0.567246	0.590349
1700101E01Rik	0.0754689	-0.140309	0.308891	0.767455
1700102P08Rik	0.106829	0.75166	0.490745	0.640381
1700106N22Rik	0.152843	2.53075	0.665867	0.529321
1700109H08Rik	0.499624	0.447908	1.49095	0.18468
1700123I01Rik	0.505697	-0.693507	0.848552	0.427466
1700123O20Rik	0.0261517	4.86349	0.452341	0.666319
1810006K21Rik	0.0182944	5.71979	0.267664	0.797583
1810008A18Rik	-0.089642	5.03414	-0.698015	0.51032
1810009A15Rik	-0.0471027	6.08754	-0.768451	0.470284
1810012P15Rik	0.133942	2.32303	0.8027	0.451619
1810013D10Rik	0.12964	3.80881	1.23774	0.260334
1810013L24Rik	0.0312095	6.20454	0.578801	0.582991
1810014B01Rik	-0.512711	1.40263	-2.07904	0.081035
1810014F10Rik	0.26107	3.13074	1.55044	0.170109
1810019D21Rik	0.828074	1.01165	2.84955	0.0279547
1810019J16Rik	0.773153	2.64199	2.73302	0.0327142
1810020D17Rik	-0.364088	3.16763	-2.24378	0.0642951
1810022K09Rik	-0.0239176	5.71202	-0.24334	0.815543
1810024B03Rik	0.223271	1.07909	1.02125	0.345074
1810026J23Rik	-0.0892822	5.12934	-1.41776	0.204191
1810027O10Rik	-0.142951	5.29832	-1.27558	0.247514
1810029B16Rik	0.342081	5.66521	3.95665	0.00690731
1810030N24Rik	0.176065	2.82081	0.956166	0.374538
1810030O07Rik	-0.0321913	5.44008	-0.597576	0.571151
1810031K17Rik	-0.343219	2.74068	-3.03441	0.0218617
1810032O08Rik	0.155438	4.97088	1.63396	0.151462
1810035L17Rik	-0.218184	5.48095	-2.41167	0.0508675
1810037I17Rik	-0.149514	6.21623	-2.8681	0.0272677
1810043G02Rik	0.00755599	3.42487	0.0646538	0.950471
1810043H04Rik	0.0121948	2.82877	0.0951568	0.927172
1810046J19Rik	-0.130585	4.22662	-1.73019	0.132395
1810048J11Rik	-0.132326	4.09984	-1.45082	0.195156
1810049H13Rik	-0.335464	0.765458	-1.6823	0.141576
1810055G02Rik	-0.127059	4.73211	-1.0112	0.349498
1810058I24Rik	0.299311	5.35855	0.99994	0.354511
1810063B05Rik	0.245426	3.76429	3.31346	0.0152211
1810063B07Rik	0.087042	1.61151	0.414527	0.692358
1810074P20Rik	-0.0275114	5.26608	-0.239585	0.818326
2010001M06Rik	0.13591	0.468737	0.606703	0.565447
2010002N04Rik	-0.65301	1.16103	-2.79878	0.0299305
2010003O02Rik	-0.00619984	0.73754	-0.0279113	0.978604
2010011I20Rik	-0.180156	2.96265	-1.88801	0.106055
2010012O05Rik	-0.306924	1.62876	-1.52933	0.175151
2010012P19Rik	0.669119	0.452302	1.22152	0.266005
2010015L04Rik	-0.651847	2.30585	-2.85626	0.0277042
2010015M23Rik	0.207874	0.54925	0.975986	0.365363
2010106G01Rik	-0.176114	5.13486	-2.76739	0.0312264
2010107E04Rik	-0.0251012	6.36108	-0.42327	0.686295
2010107G12Rik	-0.293956	1.7614	-1.63486	0.151273
2010107G23Rik	0.539639	2.24373	4.05153	0.00618037
2010107H07Rik	0.108109	1.94462	0.549018	0.602065
2010109K11Rik	-0.510095	2.45528	-3.95836	0.00689341
2010111I01Rik	0.256375	5.48785	2.41831	0.0504008
2010204K13Rik	0.0339315	2.62258	0.146064	0.888474
2010305A19Rik	-0.0201964	5.14348	-0.369212	0.724171
2010317E24Rik	0.022258	4.68588	0.258033	0.804679
2010321M09Rik	-0.0875554	5.35806	-1.23498	0.261294
2200002D01Rik	0.563054	0.108252	1.3929	0.211237
2200002K05Rik	0.968497	-0.140696	1.55813	0.168305
2210009G21Rik	0.0280116	4.22475	0.359465	0.731096
2210010C17Rik	0.992603	0.624005	3.32808	0.0149396
2210011C24Rik	0.906765	1.46989	5.56532	0.00124902
2210012G02Rik	-0.0051302	2.84289	-0.0461151	0.964659
2210013O21Rik	-0.498753	3.27362	-5.16363	0.00185204
2210015D19Rik	0.118379	3.75861	0.67931	0.521321
2210016F16Rik	0.389612	4.16618	2.23064	0.0654896
2210016L21Rik	-0.13339	5.0438	-1.90024	0.104244
2210018M11Rik	-0.064911	5.20527	-0.664117	0.530368
2210021J22Rik	0.247752	3.71095	2.50789	0.0445216
2210403K04Rik	-0.35105	1.03432	-1.65509	0.147063
2210404J11Rik	-0.573112	4.2617	-7.45456	0.000249126
2210404O09Rik	-0.0884128	3.25503	-0.831118	0.436537
2210408I21Rik	-0.343594	2.28014	-2.83828	0.0283807
2210409E12Rik	-0.291409	2.58624	-0.332001	0.750754
2210411K11Rik	-0.579802	1.37527	-2.21263	0.0671642
2210418O10Rik	-0.0330733	5.3072	-0.594076	0.573347
2300002M23Rik	-0.00336373	5.23384	-0.0132824	0.989817
2300009A05Rik	-0.00132645	0.950334	-0.00634922	0.995132
2310001A20Rik	-0.0668141	4.44264	-0.897266	0.402854
2310002J15Rik	0.582129	0.642029	2.36027	0.0546377
2310003C23Rik	0.072421	5.79249	0.934346	0.384844
2310003F16Rik	0.378132	1.89739	1.5958	0.159728
2310003H01Rik	0.385262	4.71534	4.1363	0.00560233
2310003L06Rik	0.473594	1.48609	2.40578	0.0512857
2310003L22Rik	0.189227	4.34392	2.32445	0.0574363
2310004I24Rik	-0.104851	3.72048	-1.2375	0.260419
2310004N24Rik	-0.187971	3.09042	-1.97552	0.0937544
2310008H04Rik	-0.102721	5.54062	-1.58442	0.162276
2310008H09Rik	-0.151726	7.55264	-3.46749	0.0125251
2310009B15Rik	-0.0949326	0.57523	-0.517319	0.622748
2310010G23Rik	0.000270453	1.16188	0.00170515	0.998693
2310011J03Rik	-0.0287741	4.59052	-0.344693	0.741642
2310014L17Rik	-0.310237	2.10326	-2.75591	0.0317152
2310015A10Rik	1.48922	2.03031	6.31566	0.00063005
2310016M24Rik	0.113049	4.12496	1.28006	0.246033
2310021P13Rik	-0.324741	4.32707	-3.27449	0.0159995
2310022A10Rik	0.235391	4.4679	2.47713	0.0464551
2310022B05Rik	0.21095	4.48564	1.68631	0.140784
2310028H24Rik	-0.498466	0.445985	-1.97877	0.0933265
2310030G06Rik	0.0419691	2.15234	0.244341	0.8148
2310030N02Rik	-0.133481	3.81595	-1.42712	0.201597
2310033P09Rik	-0.0973507	3.47204	-0.608741	0.564178
2310035C23Rik	-0.00841364	5.91841	-0.108324	0.917137
2310035K24Rik	0.282959	2.23507	1.47406	0.189024
2310036O22Rik	0.325282	6.40113	5.37653	0.00149925
2310037I24Rik	-0.119685	6.78056	-2.59026	0.0397494
2310039H08Rik	0.19532	2.51311	1.63885	0.150433
2310043M15Rik	-0.0631787	6.12817	-0.320343	0.759161
2310044G17Rik	-0.146877	5.04983	-1.97714	0.0935413
2310044H10Rik	0.134104	6.73742	1.57206	0.165083
2310045N01Rik	0.483407	4.43347	3.78098	0.00851723
2310046O06Rik	0.0559704	4.4986	0.526673	0.616604
2310047B19Rik	-0.0616386	3.6949	-0.354018	0.734978
2310047M10Rik	-0.372953	2.25678	-3.10317	0.0199752
2310057M21Rik	-0.0502206	3.65793	-0.595053	0.572733
2310058D17Rik	-0.277176	0.64807	-1.09512	0.313906
2310061C15Rik	0.394865	4.18047	4.41921	0.00406845
2310061I04Rik	-0.0314483	3.38322	-0.248046	0.812058
2310067B10Rik	-0.133647	5.30502	-1.62957	0.152392
2310079F23Rik	-0.136786	5.80215	-0.751003	0.479995
2400001E08Rik	0.077905	6.34631	1.25906	0.253044
2400003C14Rik	0.257259	7.06052	5.55293	0.00126391
2400009B08Rik	-0.105251	0.552846	-0.617802	0.558557
2410001C21Rik	0.0477196	6.02432	0.711882	0.502264
2410002F23Rik	0.0518516	7.04127	0.722418	0.4962
2410002I01Rik	0.138216	4.49239	1.08209	0.319231
2410002O22Rik	-0.132125	6.32531	-2.27691	0.0613813
2410003K15Rik	0.0989608	4.27703	0.496194	0.636744
2410003L11Rik	-0.381712	4.25468	-3.17793	0.018122
2410004A20Rik	2.10586	5.95039	12.417	1.23819e-05
2410004B18Rik	-0.0114619	4.30339	-0.140114	0.892982
2410004N09Rik	-0.125499	4.65466	-1.42913	0.201041
2410006H16Rik	0.146665	7.11237	1.85104	0.111721
2410012M07Rik	0.0495206	1.23861	0.183755	0.86003
2410015M20Rik	-0.196257	5.06209	-1.3685	0.218363
2410016O06Rik	-0.143767	4.96017	-2.01633	0.088516
2410017I17Rik	0.0110563	2.02994	0.0730243	0.944071
2410017P09Rik	-0.247062	2.9634	-1.72218	0.133889
2410018L13Rik	0.524247	3.93414	2.74377	0.032241
2410018M08Rik	-0.0955572	5.62676	-1.26146	0.252231
2410019O14Rik	-0.0458789	2.8978	-0.142566	0.891124
2410022L05Rik	0.120709	5.31587	1.97797	0.0934312
2410042D21Rik	-0.285236	5.24011	-2.03033	0.0867877
2410066E13Rik	-0.365885	2.13127	-3.01892	0.0223128
2410075B13Rik	0.338666	3.15153	3.02232	0.022213
2410076I21Rik	-0.51506	2.92129	-1.68786	0.14048
2410089E03Rik	0.503816	6.15407	5.00901	0.00216729
2410091C18Rik	-0.090971	4.32577	-1.21746	0.267441
2410124H12Rik	0.474678	0.323957	1.34237	0.226234
2410127L17Rik	-0.145857	6.37831	-1.78531	0.12254
2410131K14Rik	-0.133593	5.40442	-1.25924	0.252981
2410137F16Rik	0.271063	3.94277	2.1038	0.0782603
2410137M14Rik	0.0999804	3.22881	0.381688	0.715349
2410141K09Rik	0.222845	4.86616	2.34243	0.0560136
2500002B13Rik	0.781201	4.46804	3.63907	0.0101229
2500003M10Rik	-0.0257958	7.82477	-0.522619	0.619263
2500004C02Rik	0.52482	1.87766	2.76265	0.0314269
2510002D24Rik	0.2266	3.8461	2.14099	0.0742717
2510003E04Rik	-0.0250081	4.77453	-0.390296	0.70929
2510006D16Rik	-0.0318083	6.01041	-0.35589	0.733642
2510009E07Rik	0.59486	1.11899	0.527171	0.616278
2510012J08Rik	0.0741634	5.73699	0.98793	0.359919
2510039O18Rik	-0.027722	6.14128	-0.208799	0.841252
2610001J05Rik	0.000854723	4.36119	0.00254029	0.998052
2610002D18Rik	-0.0431627	4.72117	-0.435584	0.677799
2610002I17Rik	-0.354227	3.80905	-2.23313	0.0652617
2610002J02Rik	-0.0655776	3.95894	-0.588832	0.576647
2610002M06Rik	-0.866004	2.35683	-4.37971	0.00425124
2610005L07Rik	0.618865	7.36477	3.81286	0.00819666
2610008E11Rik	-0.192359	3.91366	-2.36985	0.0539139
2610015P09Rik	-0.199003	3.56912	-1.76465	0.126147
2610018G03Rik	-1.02501	3.12923	-1.98169	0.0929428
2610019E17Rik	-0.129786	3.61871	-0.954613	0.375264
2610019F03Rik	-0.384002	6.20794	-0.990038	0.358965
2610020C07Rik	0.153103	0.459887	0.723949	0.495323
2610020H08Rik	-0.214214	2.82576	-1.51399	0.178905
2610021A01Rik	-0.127804	6.32679	-2.11044	0.0775319
2610021K21Rik	-0.424107	2.51935	-3.14604	0.0188887
2610027L16Rik	0.0671337	6.21798	1.03301	0.339949
2610029G23Rik	-0.123938	5.94253	-1.2303	0.262924
2610029I01Rik	-0.310762	2.97034	-2.3969	0.0519223
2610034B18Rik	0.454157	2.34217	1.3227	0.232326
2610035D17Rik	0.707312	2.2817	1.5675	0.166132
2610037D02Rik	0.0542608	3.13497	0.221426	0.831827
2610039C10Rik	0.0245136	4.67633	0.375981	0.719378
2610101N10Rik	-0.0459872	8.33528	-0.836295	0.433828
2610301B20Rik	-0.439332	3.58816	-4.13339	0.00562112
2610301G19Rik	-0.189974	5.80633	-1.10675	0.309217
2610305D13Rik	0.0353846	7.51397	0.320419	0.759107
2610318N02Rik	-0.111028	4.67305	-0.508914	0.628297
2610507B11Rik	0.137463	8.66498	1.37974	0.215052
2610507I01Rik	0.225137	0.834117	0.87143	0.415772
2610524H06Rik	-0.126439	4.56295	-0.724753	0.494862
2610528B01Rik	0.320084	1.1168	2.09702	0.0790098
2610528E23Rik	-0.0912659	3.29411	-0.88036	0.411272
2610528J11Rik	0.614078	0.677105	1.0005	0.35426
2700007P21Rik	-0.132479	5.93146	-2.00416	0.0900472
2700016F22Rik	0.922533	-0.353619	2.27246	0.0617647
2700023E23Rik	-0.365288	3.94756	-2.73228	0.0327469
2700029M09Rik	0.453712	5.51603	3.67851	0.00964547
2700038G22Rik	0.04179	2.95992	0.238134	0.819402
2700046G09Rik	-0.00031004	0.964104	-0.00151682	0.998837
2700049A03Rik	0.0304698	5.83315	0.508316	0.628693
2700050L05Rik	0.0750586	6.2625	0.86068	0.421237
2700060E02Rik	-0.0787597	7.44088	-0.850358	0.426534
2700062C07Rik	-0.0680967	3.9461	-0.916424	0.39347
2700073G19Rik	0.389158	2.38701	2.41138	0.0508879
2700078E11Rik	-0.154738	6.95216	-2.69574	0.0344135
2700081O15Rik	0.114903	5.54636	1.07341	0.322821
2700089E24Rik	0.0455008	5.04282	0.17405	0.867334
2700094K13Rik	-0.12898	7.33236	-1.60086	0.158608
2700097O09Rik	-0.0792283	4.46324	-1.11956	0.304119
2810001G20Rik	0.0141091	1.65139	0.0801937	0.938593
2810002D19Rik	0.0295096	1.59699	0.20485	0.844206
2810002N01Rik	0.370632	4.63492	2.20596	0.067796
2810004N23Rik	0.334072	6.48834	2.72262	0.033179
2810006K23Rik	0.140913	3.99662	0.920341	0.391572
2810008D09Rik	-0.25419	3.85793	-2.10126	0.0785397
2810008M24Rik	-0.120856	5.78185	-1.66263	0.145521
2810011L19Rik	0.122857	2.03208	0.176982	0.865126
2810021B07Rik	0.0553875	4.19682	0.811528	0.446895
2810021J22Rik	-0.0111831	3.82563	-0.131374	0.899612
2810025M15Rik	0.102766	5.94158	1.46761	0.190708
2810030E01Rik	0.77496	3.3937	1.41886	0.203884
2810046L04Rik	0.218259	3.3469	2.10633	0.0779815
2810055F11Rik	0.498544	1.29777	2.46012	0.0475617
2810403A07Rik	0.0365123	6.34427	0.562855	0.593159
2810403D21Rik	0.0539723	2.52631	0.216876	0.83522
2810405K02Rik	0.186294	3.06456	1.23358	0.261781
2810407C02Rik	-0.274393	7.12152	-4.90625	0.0024102
2810408A11Rik	0.719065	3.06244	5.82942	0.000974488
2810408I11Rik	-0.132062	1.91882	-0.790451	0.458234
2810408M09Rik	-0.397628	3.57314	-4.41457	0.00408946
2810410L24Rik	0.0598552	1.26477	0.25342	0.808084
2810417H13Rik	-1.29129	5.17422	-6.48097	0.000546386
2810422J05Rik	0.380093	5.52947	5.23024	0.00173246
2810422O20Rik	-0.127572	3.43526	-1.36084	0.220646
2810428I15Rik	0.521464	4.83016	6.6246	0.000483864
2810429I04Rik	0.0605292	3.12542	0.680272	0.520752
2810432D09Rik	-0.0399793	4.66678	-0.585056	0.57903
2810442I21Rik	-0.284433	0.675849	-0.763263	0.473157
2810453I06Rik	0.0279606	4.30492	0.160094	0.877862
2810455O05Rik	0.0446223	0.0558667	0.16686	0.872755
2810474O19Rik	0.458059	7.59731	2.96445	0.0239806
2900005J15Rik	-0.169362	0.128366	-0.299985	0.773928
2900010M23Rik	0.0382689	5.36899	0.515815	0.623739
2900011O08Rik	-0.879153	3.19189	-4.0677	0.00606519
2900026A02Rik	0.259729	4.07896	3.70031	0.00939231
2900041M22Rik	0.450633	0.643846	2.43665	0.049134
2900052L18Rik	0.270935	2.52474	1.09388	0.314413
2900053A13Rik	0.51273	4.46749	6.5872	0.000499321
2900064A13Rik	-0.311761	4.79038	-3.45742	0.0126843
2900076A07Rik	0.0872718	1.9119	0.615459	0.560007
2900092E17Rik	0.0192997	3.26062	0.230707	0.824918
2900097C17Rik	-0.167604	3.46086	-1.16285	0.287407
3000002C10Rik	0.121039	1.524	0.676167	0.523184
3010026O09Rik	0.0753979	3.42911	0.580754	0.581752
3110001D03Rik	-0.246029	4.35881	-3.0369	0.0217903
3110001I22Rik	-0.0885743	3.26454	-0.91226	0.395496
3110002H16Rik	-0.757874	6.48617	-2.4356	0.0492055
3110003A17Rik	-0.778386	3.68723	-4.40383	0.00413857
3110007F17Rik	0.205	1.39612	1.13635	0.297543
3110009E18Rik	-0.294292	0.862705	-0.862657	0.420228
3110040N11Rik	0.153973	3.35523	0.662166	0.531537
3110043O21Rik	-0.178979	4.23623	-1.90217	0.103961
3110047P20Rik	-0.558379	-0.0869852	-0.576953	0.584164
3110052M02Rik	-0.293737	0.539713	-1.51349	0.179029
3110053B16Rik	0.0497126	2.59049	0.328778	0.753074
3110056K07Rik	0.0678637	1.5832	0.414397	0.692448
3110056O03Rik	-0.0535459	4.45088	-0.505294	0.630695
3110057O12Rik	-0.442839	1.51839	-3.41458	0.013387
3110062M04Rik	0.339291	2.76137	1.3683	0.218422
3110082I17Rik	-0.207881	4.31457	-1.13807	0.296878
3200002M19Rik	0.00837017	5.60805	0.108567	0.916952
3222401L13Rik	0.103846	2.50666	0.644631	0.542117
3230401D17Rik	0.124733	5.12162	1.2492	0.256392
3300002I08Rik	0.0306221	1.72106	0.152513	0.883593
3632451O06Rik	-1.42655	3.87602	-9.06801	8.03494e-05
3830406C13Rik	-0.413701	1.59154	-2.26798	0.0621529
3830431G21Rik	-0.568886	1.64334	-1.88012	0.107241
4632404H12Rik	0.243946	1.28621	1.60764	0.15712
4632411B12Rik	-0.0999261	6.02963	-1.70216	0.137696
4632415K11Rik	0.54269	3.74542	6.22261	0.000683514
4632415L05Rik	0.191126	2.10686	0.712504	0.501905
4632419I22Rik	-0.00288907	4.988	-0.0505529	0.961261
4632427E13Rik	0.333974	4.21125	3.52344	0.0116791
4632434I11Rik	-0.17574	5.8989	-1.44763	0.196011
4732418C07Rik	0.0735912	5.19283	0.899216	0.401891
4732444A12Rik	-1.18079	1.4014	-4.3319	0.00448491
4732471D19Rik	0.435962	2.70356	2.71086	0.0337131
4831426I19Rik	0.480728	1.0385	2.63397	0.0374392
4833407H14Rik	0.806952	1.09358	4.08698	0.00593094
4833417C18Rik	-0.337828	1.34694	-2.12658	0.0757919
4833420G17Rik	-0.0957509	5.5199	-1.92186	0.101118
4833439L19Rik	0.0162463	6.64947	0.198931	0.848638
4833442J19Rik	-0.039462	2.33512	-0.0844185	0.935366
4921513D23Rik	0.171647	6.18126	2.04432	0.0850939
4921517L17Rik	0.2562	0.483496	1.17449	0.283048
4921524J17Rik	0.0425231	4.27596	0.575078	0.585356
4922501C03Rik	0.199966	5.17309	2.97015	0.0237998
4930402H24Rik	0.389918	4.63567	1.71991	0.134315
4930420K17Rik	0.118348	3.51411	1.11907	0.304313
4930422G04Rik	0.177581	5.29424	2.85186	0.0278681
4930427A07Rik	0.116669	5.71159	1.42462	0.202286
4930429B21Rik	-0.596759	0.980905	-1.51145	0.179534
4930430F08Rik	-0.00756165	3.72112	-0.0739786	0.943341
4930432K21Rik	1.63076	2.48056	3.57994	0.0108881
4930443B20Rik	0.147099	3.49493	1.21463	0.268445
4930444A02Rik	0.263831	5.54318	3.10812	0.0198464
4930444M15Rik	0.211878	0.055561	0.728083	0.492959
4930447C04Rik	-0.265878	2.11513	-1.76632	0.125852
4930452B06Rik	-0.315545	2.20996	-2.30416	0.0590869
4930453N24Rik	0.0406405	6.13761	0.75811	0.476023
4930455C21Rik	0.0556796	4.00204	0.740895	0.485683
4930455F23Rik	-0.373126	2.32207	-1.96982	0.0945104
4930458D05Rik	1.03041	-0.453272	1.68851	0.140352
4930461G14Rik	0.433066	2.60064	2.39508	0.0520542
4930471M23Rik	0.298144	5.04992	5.26782	0.00166887
4930473A06Rik	-0.0307697	3.15862	-0.280037	0.788499
4930480K23Rik	0.165613	0.73955	0.791944	0.457424
4930486L24Rik	0.589559	-0.255636	1.11181	0.307198
4930500J02Rik	-1.12826	4.09608	-2.07383	0.0816314
4930502E18Rik	-2.01507	0.87284	-8.02026	0.000163924
4930503L19Rik	-0.469907	4.45441	-4.58908	0.00337643
4930506M07Rik	0.547035	1.73603	2.60778	0.0388059
4930513N10Rik	0.532337	1.46032	3.07351	0.0207664
4930518I15Rik	0.788049	0.364283	2.99599	0.0229993
4930519F16Rik	0.265705	4.03511	2.31734	0.0580096
4930522L14Rik	-0.0882049	4.37665	-0.756559	0.476887
4930526A20Rik	0.406147	0.474706	1.4675	0.190736
4930526L06Rik	-0.784697	-0.161557	-1.47545	0.188664
4930534B04Rik	-0.000624396	4.67084	-0.00462764	0.996452
4930539E08Rik	0.506352	3.4692	5.5748	0.00123776
4930539J05Rik	-0.0610825	-0.0888192	-0.27126	0.79494
4930547N16Rik	-0.249916	4.71665	-1.30082	0.239275
4930550L24Rik	-1.94091	-0.379759	-4.89699	0.00243356
4930556M19Rik	0.467011	1.21819	2.9053	0.0259446
4930558J18Rik	-0.121378	1.85589	-0.627428	0.552624
4930566F21Rik	0.179382	4.63271	2.06726	0.0823893
4930572J05Rik	0.0823855	2.15248	0.31548	0.762679
4930578N16Rik	-0.175735	0.0378889	-0.804531	0.450637
4930579G24Rik	-0.0375695	4.59677	-0.348669	0.738798
4930581F22Rik	0.0240573	1.25499	0.143719	0.890251
4930583H14Rik	-0.755468	1.40575	-3.02983	0.0219942
4931406C07Rik	-0.0648959	2.18509	-0.558968	0.595653
4931406P16Rik	-0.0748657	6.15696	-1.46165	0.192277
4931407G18Rik	0.165783	-0.0316765	0.568093	0.589808
4931414P19Rik	0.315893	2.68837	2.27687	0.0613848
4931428F04Rik	0.375744	3.1893	4.00864	0.00649787
4931440P22Rik	-0.541379	-0.0409223	-1.91601	0.101954
4932415G12Rik	0.130829	0.177703	0.354361	0.734733
4932438A13Rik	0.285331	6.1897	1.66708	0.144621
4933402E13Rik	0.836941	0.201392	0.6075	0.56495
4933403F05Rik	-0.129739	5.93606	-1.47872	0.187816
4933403G14Rik	0.84636	4.04798	2.50131	0.0449281
4933404O12Rik	-0.415579	1.02765	-1.17415	0.283177
4933407C03Rik	0.647974	4.64524	4.39559	0.00417666
4933407H18Rik	0.276034	2.53977	1.42007	0.203549
4933407K13Rik	0.217075	3.11961	1.42272	0.202813
4933411K20Rik	0.342607	4.74217	5.67327	0.00112739
4933415A04Rik	0.295125	0.0437692	1.38622	0.213165
4933421E11Rik	-0.203968	3.54478	-2.06251	0.0829421
4933424B01Rik	0.19663	6.99679	0.625966	0.553522
4933426M11Rik	0.142624	5.6065	1.25343	0.254951
4933427D06Rik	-1.14337	0.0400773	-3.06258	0.0210666
4933427D14Rik	0.00909386	4.19062	0.0686412	0.947421
4933431E20Rik	0.00441106	0.476655	0.0154619	0.988146
4933433G15Rik	0.53072	-0.10392	1.41965	0.203666
4933433P14Rik	-0.0392795	2.49632	-0.214492	0.836999
4933434E20Rik	-0.251923	4.93685	-2.86215	0.0274859
4933436C20Rik	-0.271	0.89835	-1.33705	0.227868
4933437F05Rik	-0.118594	1.77381	-0.637345	0.546551
4933439C10Rik	0.570556	1.58774	3.96227	0.00686167
4933439F18Rik	0.00618193	6.33292	0.127561	0.902507
5031425E22Rik	0.328077	2.82699	2.18998	0.0693334
5031439G07Rik	0.220545	5.30455	0.744406	0.483702
5033414D02Rik	-0.270162	2.80494	-1.08526	0.317929
5133400J02Rik	-0.495778	0.998713	-2.82604	0.0288515
5133401N09Rik	-0.0616379	2.87272	-0.412034	0.694091
5330411J11Rik	1.88311	-1.05914	1.25342	0.254953
5330426P16Rik	0.352817	-0.368656	0.774305	0.467056
5330438D12Rik	0.421087	0.557083	1.52491	0.176225
5430403G16Rik	-0.0439633	4.66935	-0.457456	0.662834
5430405H02Rik	-0.0575195	1.01389	-0.300233	0.773748
5430407P10Rik	-0.722757	-0.234194	-2.56538	0.0411311
5430411K18Rik	0.172154	4.93335	2.48304	0.0460768
5430416N02Rik	0.34368	5.02735	4.76015	0.00281017
5430417L22Rik	-0.555369	0.829566	-1.95062	0.0971021
5430437P03Rik	0.389449	5.76222	4.12599	0.00566932
5530601H04Rik	-0.0915994	3.1903	-0.571244	0.587797
5730403B10Rik	0.0335258	5.58744	0.676925	0.522735
5730405O15Rik	-0.161778	0.833762	-1.08896	0.316416
5730409E04Rik	-0.049612	1.64966	-0.22123	0.831973
5730419I09Rik	0.559918	6.46225	1.4845	0.186327
5730437N04Rik	-0.25162	4.30601	-1.96583	0.0950432
5730455O13Rik	-0.354785	3.44751	-4.69662	0.00300698
5730455P16Rik	-0.131536	4.35852	-1.52239	0.17684
5730469M10Rik	-1.26831	4.51713	-6.95678	0.000368154
5730494M16Rik	-0.093082	4.31983	-0.555544	0.597855
5730494N06Rik	-0.0103718	4.0851	-0.0745877	0.942876
5730507C01Rik	0.260023	4.44327	2.62782	0.0377556
5730508B09Rik	0.00570275	0.398658	0.022874	0.982465
5730528L13Rik	-0.32386	4.70685	-1.99726	0.0909269
5730559C18Rik	0.527847	3.48149	2.1956	0.0687883
5730590G19Rik	0.242437	6.77033	3.01529	0.02242
5830415F09Rik	-0.0160203	4.16278	-0.148722	0.886462
5830416P10Rik	1.18691	0.296402	3.61971	0.0103667
5830417I10Rik	0.114565	5.93241	1.72378	0.133589
5830418K08Rik	0.109183	6.60035	1.93143	0.0997631
5830428H23Rik	0.138742	2.43264	0.986087	0.360755
5830433M19Rik	-0.400383	4.13238	-4.99265	0.00220404
5830444B04Rik	-0.498492	0.0255276	-1.81636	0.117307
5930412G12Rik	0.678905	1.4836	1.17005	0.284705
5930416I19Rik	0.165041	5.21557	0.607416	0.565003
5930434B04Rik	-0.0381863	2.63833	-0.325291	0.755588
5S_rRNA	0.433339	0.991538	2.37532	0.0535048
6030419C18Rik	-1.25895	0.519921	-4.68234	0.00305334
6030422M02Rik	0.316432	2.25985	0.979101	0.363937
6030429G01Rik	-0.478548	2.5747	-3.10089	0.0200349
6030442K20Rik	0.220041	-0.00678545	0.688026	0.516176
6030443J06Rik	0.407814	-0.108703	1.48313	0.186681
6030446N20Rik	-0.579396	2.69331	-2.19155	0.0691806
6030455H03Rik	0.421424	1.28569	2.11147	0.07742
6030458C11Rik	-0.0799253	6.50651	-1.24571	0.257588
6230409E13Rik	-0.0499006	0.517584	-0.270801	0.795276
6230427J02Rik	0.436699	0.207952	1.14596	0.293834
6330403K07Rik	-0.407192	0.146841	-1.07174	0.323514
6330403L08Rik	0.510547	1.95247	1.5676	0.166109
6330407J23Rik	-0.841934	0.378856	-2.67702	0.0353022
6330408A02Rik	0.393864	2.78866	3.15063	0.0187762
6330409N04Rik	-0.274825	3.53447	-3.00574	0.0227046
6330416G13Rik	0.553035	4.25186	6.26667	0.000657582
6330418K02Rik	0.22845	0.299187	1.03395	0.339541
6330439K17Rik	-0.711798	-0.0648791	-3.03543	0.0218324
6330503K22Rik	-0.14524	6.06782	-2.56018	0.0414268
6330545A04Rik	0.335733	0.163669	1.38514	0.21348
6330549D23Rik	0.106704	0.970651	0.610902	0.562835
6330578E17Rik	-0.185744	6.45878	-1.39366	0.211017
6430527G18Rik	-0.449637	6.28256	-2.89741	0.0262194
6430573F11Rik	0.212568	0.394675	0.595849	0.572234
6430598A04Rik	0.873149	2.68457	2.64575	0.0368409
6430704M03Rik	-0.955535	2.99704	-1.33192	0.229452
6530401N04Rik	-0.0464149	4.32112	-0.585841	0.578535
6530418L21Rik	-0.751533	1.06442	-4.75916	0.00281312
6720401G13Rik	0.0250316	4.53674	0.223879	0.83
6720456B07Rik	0.40724	6.68381	1.5046	0.181238
6720456H20Rik	-0.144805	2.77014	-0.726822	0.493679
6720463M24Rik	-0.0291556	5.62587	-0.287549	0.783
6720489N17Rik	0.188912	1.06227	0.57414	0.585953
6820431F20Rik	0.597252	6.68436	3.56143	0.0111405
7SK	-0.367094	13.8652	-3.39689	0.0136897
8030462N17Rik	-0.123449	6.1305	-1.91317	0.102362
8030474K03Rik	0.346927	0.526723	0.465495	0.657376
8430406I07Rik	-0.048692	5.31936	-0.578904	0.582925
8430410A17Rik	0.149824	6.74312	0.714409	0.500805
8430410K20Rik	-0.195087	6.00785	-3.1214	0.019505
8430419L09Rik	0.543779	3.43782	1.81901	0.11687
8430427H17Rik	1.11082	3.70748	2.44736	0.04841
8430429K09Rik	0.199711	-0.0193326	0.727631	0.493217
9030025P20Rik	0.0252927	2.51751	0.14732	0.887523
9030418K01Rik	-1.55784	0.259892	-5.34369	0.00154834
9030425E11Rik	0.103545	3.03813	0.674565	0.524136
9030617O03Rik	-0.787864	3.31479	-1.24619	0.257423
9030624G23Rik	-0.0460889	2.41081	-0.189731	0.85554
9030624J02Rik	-0.0601458	6.54899	-0.346906	0.740059
9030625A04Rik	-0.81498	1.30132	-2.69518	0.03444
9130011E15Rik	0.0686785	4.35331	0.825834	0.439314
9130011J15Rik	0.272953	6.30425	4.68169	0.00305547
9130017N09Rik	1.32126	3.18884	6.68921	0.00045843
9130019O22Rik	0.11116	3.00155	1.05033	0.332519
9130020K20Rik	0.487376	0.05858	1.51978	0.177479
9130023H24Rik	0.492956	2.23063	3.82544	0.00807377
9130221H12Rik	-0.0325886	2.94341	-0.255331	0.806673
9130401M01Rik	-0.24488	5.14122	-1.17478	0.28294
9230110C19Rik	-0.680892	0.485819	-4.38403	0.00423082
9230112E08Rik	0.303007	1.08066	1.2909	0.242482
9230114K14Rik	0.0630192	1.71587	0.335896	0.747953
9230116N13Rik	0.571831	0.0257248	1.60026	0.15874
9330020H09Rik	0.336773	0.732913	1.73472	0.131556
9330104G04Rik	0.0943018	-0.14736	0.226456	0.828081
9330133O14Rik	0.80974	1.85295	4.35953	0.00434819
9330151L19Rik	0.0820051	1.30849	0.535981	0.610524
9330159M07Rik	-0.803439	0.874196	-3.67834	0.00964751
9330182L06Rik	-0.323194	0.664185	-1.5905	0.16091
9330185C12Rik	0.364283	1.09537	1.33784	0.227624
9430008C03Rik	0.309436	5.724	4.1957	0.00523319
9430015G10Rik	-0.050017	4.94895	-0.81165	0.44683
9430016H08Rik	-0.197696	4.60223	-2.57189	0.0407647
9430020K01Rik	-0.700327	3.35016	-4.65269	0.00315214
9430023L20Rik	-0.00731953	5.13638	-0.0715475	0.9452
9430037G07Rik	0.183664	0.92184	0.541976	0.606626
9430038I01Rik	0.129116	3.32361	1.3655	0.219253
9530008L14Rik	0.399804	0.239879	0.692705	0.513427
9530052C20Rik	0.433089	-0.206925	1.50039	0.182294
9530068E07Rik	-0.277467	5.32673	-3.3784	0.014014
9530077C05Rik	-0.361329	0.581645	-1.38443	0.213687
9530082P21Rik	1.09397	0.113067	1.36462	0.219517
9630033F20Rik	0.326269	7.2135	2.77724	0.0308134
9830001H06Rik	0.0885973	3.55517	0.978635	0.36415
9830144P21Rik	-0.058385	0.585558	-0.205052	0.844055
9830147E19Rik	0.161771	5.86436	1.05775	0.329376
9930012K11Rik	0.105614	1.23445	0.447776	0.669437
9930013L23Rik	0.484314	1.73625	0.604134	0.567049
9930014A18Rik	-0.000719042	0.56338	-0.00128685	0.999013
9930021J03Rik	0.0533316	5.15723	0.85499	0.424151
9930104L06Rik	0.0259269	4.5383	0.416909	0.690704
A030009H04Rik	-0.223058	2.29811	-1.07332	0.322857
A130010J15Rik	0.126207	3.45533	1.50497	0.181145
A130022J15Rik	0.523248	5.42578	2.21364	0.0670693
A230046K03Rik	-0.119562	7.47979	-2.14962	0.0733769
A230050P20Rik	0.63358	3.50497	2.25156	0.0635985
A230051G13Rik	0.148849	3.26857	0.737136	0.487811
A230072C01Rik	-0.450318	0.932526	-2.207	0.0676967
A2ld1	0.0953207	3.21715	0.913701	0.394794
A2m	-0.805403	3.70731	-2.60435	0.0389887
A330021E22Rik	-0.712928	-0.332332	-1.97054	0.0944146
A330023F24Rik	-0.486805	0.080066	-2.74679	0.0321093
A330035P11Rik	-0.0196465	0.555476	-0.0700165	0.94637
A330049M08Rik	-0.209494	1.65235	-1.27523	0.247631
A430005L14Rik	0.307033	4.93755	3.81812	0.00814502
A430033K04Rik	-0.320734	3.94121	-2.47979	0.0462843
A430046D13Rik	0.280636	0.343366	1.32394	0.231937
A430057M04Rik	0.090314	0.41565	0.330457	0.751865
A430104N18Rik	-0.442018	1.38945	-0.773178	0.467676
A4galt	0.590439	6.56162	5.40224	0.00146204
A530017D24Rik	0.144773	2.67539	0.935213	0.38443
A530054K11Rik	-0.0487868	5.73745	-0.791739	0.457535
A630007B06Rik	0.104626	5.19183	1.32598	0.2313
A630052C17Rik	-0.0412027	1.41068	-0.196714	0.850301
A630055G03Rik	0.237602	3.04725	1.43611	0.199129
A730011L01Rik	0.226881	3.32471	2.27659	0.0614086
A730036I17Rik	0.535139	1.00675	1.5257	0.176033
A730049H05Rik	0.0640405	2.98549	0.457713	0.66266
A730085A09Rik	-0.863793	1.34145	-2.04539	0.0849664
A830007P12Rik	0.736454	3.60356	3.03132	0.0219511
A830010M20Rik	-0.116337	1.8577	-0.922468	0.390545
A830018L16Rik	-0.463344	3.62133	-2.25848	0.0629853
A830080D01Rik	-0.0724967	6.46307	-1.29649	0.24067
A930001C03Rik	0.28741	-0.150634	0.991018	0.358522
A930001N09Rik	-0.0525054	4.73421	-0.355679	0.733793
A930004D18Rik	0.720122	2.10184	0.992644	0.357789
A930011O12Rik	-0.400895	2.2095	-2.41128	0.050895
A930015D03Rik	0.285505	0.423947	1.25154	0.255594
A930024E05Rik	0.734745	0.303971	3.42443	0.0132219
AA386476	0.920649	1.35701	5.38119	0.00149243
AA414768	-0.502265	0.924265	-2.85195	0.0278647
AA467197	0.167595	3.85499	0.371604	0.722476
AA960436	0.529145	3.88264	5.40318	0.0014607
AA986860	1.17673	2.73298	5.53764	0.00128256
AA987161	-0.0439783	5.82188	-0.643996	0.542503
AC027184.1	-0.259294	12.2437	-2.24229	0.0644294
AC099934.1	-1.02634	12.8553	-6.16719	0.000717809
AC120136.1	0.0275258	1.03579	0.0856298	0.934441
AC120136.2	0.503559	0.0632996	1.3557	0.222189
AC120136.3	-1.50659	4.84157	-8.5301	0.00011478
AC125484.1	-0.476073	1.33766	-1.97048	0.094423
AC134325.1	-0.399954	1.11905	-1.86013	0.1103
AC147142.1	0.186505	0.683496	0.697409	0.510674
AC150277.1	-0.413413	1.09962	-2.34095	0.0561293
AC156953.1	-0.789423	4.3854	-3.89186	0.00745807
AC157822.1	-1.02238	12.9981	-6.42558	0.000572922
AC158898.1	-0.961858	0.207849	-2.64981	0.0366375
AC161763.1	-0.431451	2.32513	-3.33184	0.0148683
AC175035.1	0.194423	4.63773	1.4657	0.191208
AI118078	1.13328	0.472822	1.3944	0.210803
AI314180	-0.244151	5.51656	-1.5563	0.168734
AI314976	0.224207	6.14357	2.41113	0.0509057
AI316807	0.312459	2.50071	2.3689	0.0539856
AI413582	0.310731	2.83681	2.76821	0.0311915
AI428936	0.120529	3.77316	1.11003	0.307905
AI462493	-0.32238	4.06842	-4.17739	0.00534403
AI464131	0.784064	5.78149	2.83686	0.0284349
AI467606	-0.143542	3.46113	-1.33937	0.227155
AI480526	0.397887	2.68816	1.89696	0.104727
AI480653	-0.215651	4.85705	-2.96808	0.0238654
AI597468	-0.0167629	5.38599	-0.189932	0.855388
AI597479	-0.00953545	5.38988	-0.177515	0.864725
AI606181	0.0653292	1.83669	0.226041	0.82839
AI661453	0.880458	1.59694	4.73863	0.00287519
AI662270	-1.67972	4.72204	-2.71908	0.0333388
AI837181	-0.0395959	4.37902	-0.297106	0.776026
AI846148	0.125182	5.36194	1.33514	0.228458
AI848100	-0.0539229	6.24336	-0.953072	0.375986
AI854703	0.105181	0.781358	0.541365	0.607022
AI987944	-0.112626	3.23706	-0.804473	0.450668
AK129341	-0.818783	2.32193	-7.39765	0.000260215
AK157302	-0.0470243	2.17113	-0.225615	0.828707
AL591712.1	-0.11523	3.41799	-0.853488	0.424922
AL645948.1	0.271025	-0.0499311	1.31689	0.234154
AL646020.1	0.127747	1.81891	0.841536	0.431099
AL672228.1	0.651314	0.507031	1.70963	0.136265
AU015836	0.285232	0.981153	0.929051	0.387378
AU018091	0.205731	6.04862	1.44401	0.196987
AU019823	-0.125588	5.28753	-1.85163	0.111628
AU022252	-0.142435	5.50414	-2.63386	0.0374448
AU040320	-0.283928	3.61019	-2.71911	0.0333378
AU041133	0.197615	2.22489	1.12525	0.30188
AV099323	-0.137419	-0.0699178	-0.598634	0.570487
AW146020	0.319274	4.93657	1.07751	0.32112
AW146154	-0.0570469	2.63273	-0.55513	0.598122
AW209491	-0.24778	3.61214	-1.39955	0.20933
AW549877	-0.0915662	6.41878	-0.639816	0.545045
AW551984	-1.22818	-0.329209	-4.67796	0.00306769
AW554918	-0.171065	3.61185	-2.09427	0.0793168
AW555464	0.518026	5.49826	4.54888	0.00352743
AY036118	-8.56169	6.96468	-6.14163	0.000734286
Aaas	-0.0713113	6.39759	-1.43899	0.198347
Aacs	0.0406364	5.8672	0.468387	0.655418
Aagab	-0.09629	5.54064	-0.679132	0.521426
Aak1	0.462533	3.06375	1.98219	0.0928777
Aamp	-0.135903	7.22883	-1.4021	0.208605
Aard	-0.554124	0.994986	-3.05731	0.0212128
Aars	0.387624	9.45344	9.18339	7.46121e-05
Aars2	-0.0515948	5.82806	-0.55569	0.597761
Aarsd1	0.0804673	5.99643	0.849413	0.427021
Aasdh	0.225312	3.96634	2.39969	0.0517214
Aasdhppt	-0.165123	6.17233	-3.17575	0.0181732
Aatf	0.0180223	6.03465	0.2129	0.838188
Abat	-1.56729	0.077554	-5.8486	0.00095739
Abca1	0.560564	5.04762	1.56282	0.167213
Abca2	-0.0521118	4.08013	-0.531818	0.613239
Abca3	0.15835	3.74262	1.22946	0.263216
Abca5	-0.23916	1.9608	-1.24229	0.258763
Abca7	0.794898	5.84141	11.13	2.38857e-05
Abca8b	0.782015	0.515199	2.72169	0.0332211
Abcb10	0.263185	4.98188	2.33933	0.0562566
Abcb1a	0.339032	4.96577	1.28592	0.244108
Abcb1b	-0.50728	5.34683	-6.35105	0.000610976
Abcb6	-0.283307	5.41202	-1.51728	0.178094
Abcb7	-0.354175	6.88575	-4.189	0.00527342
Abcb8	-0.0778934	5.48742	-0.743843	0.484019
Abcc1	-0.118536	6.47544	-1.26726	0.250285
Abcc10	0.271072	3.09655	1.86426	0.109662
Abcc2	-2.08465	-0.403257	-8.70726	0.000101846
Abcc4	-0.16401	6.47786	-1.02754	0.342323
Abcc5	0.282196	7.16306	1.73371	0.131743
Abcc8	0.504877	1.34084	0.753651	0.478512
Abcd1	0.437491	3.0033	3.38362	0.0139216
Abcd3	0.000228376	6.10602	0.00359361	0.997245
Abcd4	0.41143	5.58941	5.56458	0.0012499
Abce1	0.209901	9.45752	4.91222	0.00239529
Abcf1	-0.0253594	7.66572	-0.41756	0.690252
Abcf2	-0.0445068	7.58511	-0.587914	0.577226
Abcf3	0.0187288	5.8268	0.171996	0.868882
Abcg1	0.72258	5.73187	8.94742	8.68954e-05
Abcg2	-0.349805	5.82028	-0.760865	0.474489
Abhd1	0.164015	1.08815	0.653892	0.536512
Abhd10	-0.0443186	4.80199	-0.388295	0.710696
Abhd11	0.306689	5.06834	3.20624	0.0174697
Abhd12	-0.156923	5.18081	-2.74757	0.0320753
Abhd13	0.290004	5.86298	4.70977	0.002965
Abhd14a	-0.140438	4.41605	-1.39163	0.211601
Abhd14b	0.81222	1.76988	2.09026	0.0797651
Abhd16a	-0.0374021	4.41398	-0.372737	0.721674
Abhd2	0.279226	6.57182	5.25727	0.00168646
Abhd4	-0.0847708	5.23262	-0.954777	0.375188
Abhd5	-0.438007	2.83882	-4.23181	0.00502204
Abhd6	-0.32433	2.31958	-2.47342	0.0466937
Abhd8	0.34907	3.85261	2.28691	0.0605287
Abi1	-0.0635671	6.02675	-1.13923	0.296428
Abi2	-0.2596	6.17509	-2.80493	0.0296833
Abi3	-0.107816	0.620796	-0.429367	0.682081
Abl1	0.342401	6.66569	2.1871	0.0696141
Abl2	-0.0826266	6.78201	-0.932182	0.385878
Ablim1	0.795637	6.7307	4.07515	0.00601289
Ablim2	0.70621	3.74926	4.17559	0.00535506
Abr	0.666316	6.33819	6.58624	0.000499724
Abt1	0.197009	4.90842	2.59379	0.0395573
Abtb1	-0.00612786	5.13856	-0.0755914	0.942109
Abtb2	-0.179821	2.0831	-0.443562	0.672321
Acaa1a	0.0570334	5.75686	0.467875	0.655764
Acaa1b	0.278839	1.47769	0.842796	0.430445
Acaa2	0.706863	4.86907	1.51208	0.179376
Acaca	-0.0542561	6.58361	-0.345782	0.740863
Acacb	-1.0559	5.79104	-4.49746	0.00373166
Acad10	0.285912	2.41001	1.89885	0.104448
Acad11	0.0554141	4.70231	0.512877	0.625677
Acad12	0.338214	1.68902	1.12856	0.300582
Acad8	-0.145184	4.67608	-1.21648	0.267789
Acad9	0.103277	6.12031	0.579689	0.582428
Acadl	0.0125906	4.01985	0.101248	0.922528
Acadm	0.237818	7.0436	1.06926	0.324545
Acads	0.231706	5.73116	3.0051	0.0227238
Acadsb	-0.221657	4.89624	-2.70608	0.0339329
Acadvl	-0.678865	3.61945	-8.3282	0.000131882
Acap1	0.549435	3.67387	2.5012	0.0449348
Acap2	-0.15235	5.9408	-2.79332	0.0301517
Acap3	-0.158197	3.99913	-1.0157	0.347512
Acat1	-0.311028	4.11162	-2.35864	0.0547624
Acat2	-0.202909	6.80393	-3.62123	0.0103473
Acat3	-0.236855	3.42453	-2.52779	0.043316
Acbd3	0.105339	5.45377	1.92248	0.10103
Acbd4	-0.0962734	3.6357	-1.19258	0.276385
Acbd5	-0.148615	5.17223	-1.95531	0.0964631
Acbd6	-0.325562	4.17515	-3.49834	0.0120506
Acbd7	-0.99122	-0.373925	-4.24342	0.00495625
Accn2	0.333801	1.38433	0.783314	0.462119
Accs	-0.0228628	2.50693	-0.168017	0.871882
Accsl	-0.891447	3.2912	-1.79653	0.120622
Acd	0.403382	4.87929	5.13755	0.00190138
Ace	0.148619	0.4321	0.315935	0.76235
Acer2	-0.316457	3.76217	-3.39142	0.0137848
Acer3	-0.385315	3.6622	-3.61513	0.0104253
Acin1	0.140236	7.98603	1.49748	0.183027
Acly	-0.0721225	9.2962	-1.6058	0.157521
Acn9	0.201856	3.252	0.760795	0.474528
Aco1	-0.0644371	6.67527	-0.60826	0.564478
Aco2	-0.0953023	8.52963	-1.91676	0.101847
Acot1	-1.15558	1.35641	-5.89311	0.000919
Acot11	0.630059	0.449495	1.50163	0.181982
Acot13	0.324203	3.75294	4.05204	0.00617671
Acot2	-0.117743	1.70087	-0.334041	0.749286
Acot7	0.0235466	5.65239	0.408506	0.696548
Acot8	-0.0135097	4.04129	-0.0700539	0.946341
Acot9	0.0672627	6.45507	0.583002	0.580329
Acox1	0.0828558	5.53347	0.641222	0.544189
Acox3	-0.346914	5.95314	-1.71777	0.134719
Acoxl	0.988453	0.995708	5.81284	0.000989555
Acp1	-0.134431	6.68336	-1.63249	0.151774
Acp2	-0.407755	4.42507	-5.58355	0.00122747
Acp5	0.644705	1.3754	1.4095	0.206507
Acp6	0.0258223	4.63606	0.109693	0.916095
Acpl2	0.043965	1.99304	0.274944	0.792234
Acpp	0.762372	3.62869	2.10728	0.0778777
Acrbp	0.341915	3.73906	1.09576	0.313649
Acsbg2	0.584704	1.40861	2.30693	0.0588587
Acsf2	0.881691	4.09585	0.806277	0.449701
Acsf3	0.264429	3.4156	2.63745	0.0372614
Acsl1	0.0101232	5.50563	0.176332	0.865615
Acsl3	-0.143772	6.7807	-1.48962	0.185019
Acsl4	-0.129486	4.59172	-0.996989	0.355834
Acsl5	-0.153245	4.1173	-0.606884	0.565334
Acsl6	-0.665829	2.60436	-4.52778	0.00360968
Acss1	0.265238	6.31549	4.36195	0.00433646
Acss2	0.110404	3.74979	0.63072	0.550603
Actb	0.089663	11.6303	0.75022	0.480434
Actg1	0.0169034	9.74731	0.314431	0.763439
Actl6a	-0.202127	7.6309	-4.74349	0.00286036
Actn1	0.349092	7.83068	2.88254	0.0267457
Actn3	-0.70916	0.155351	-2.53198	0.0430668
Actn4	0.40767	7.25062	7.25984	0.000289491
Actr10	-0.220131	5.63024	-2.77394	0.030951
Actr1a	-0.163535	6.60984	-3.17835	0.0181122
Actr1b	0.114201	6.72534	1.81512	0.117512
Actr2	0.0988656	8.24783	0.971844	0.367266
Actr3	-0.0711823	7.72103	-1.4658	0.191182
Actr3b	-0.431033	2.82217	-3.52452	0.0116634
Actr5	-0.124134	3.65356	-0.776768	0.465703
Actr6	-0.154425	4.33131	-2.17813	0.0704965
Actr8	-0.0221548	5.55055	-0.438325	0.675914
Acvr1	0.144588	2.77132	0.649915	0.538915
Acvr1b	0.554156	5.40275	8.50325	0.0001169
Acvr2a	-0.244457	4.57081	-3.86937	0.0076605
Acvr2b	0.0875027	3.8087	0.768965	0.469999
Acy1	-0.334753	5.19768	-3.11591	0.0196453
Acy3	0.592882	0.43391	1.92837	0.100194
Acyp1	-0.393963	3.4814	-3.42224	0.0132583
Acyp2	-0.18887	0.805083	-0.810693	0.44734
Ada	0.513701	3.50742	1.4417	0.19761
Adad2	0.857428	-0.592025	1.41648	0.20455
Adal	0.064871	4.75158	0.917687	0.392858
Adam10	-0.092932	5.15054	-0.698607	0.509975
Adam11	0.442452	1.568	1.34343	0.225911
Adam15	2.76309e-06	4.97577	1.86684e-05	0.999986
Adam17	-0.121441	6.08973	-1.99231	0.0915628
Adam19	-0.374027	7.34193	-4.41152	0.00410333
Adam1a	0.378429	-0.134007	1.06246	0.327389
Adam22	-0.134904	3.84155	-1.57541	0.164318
Adam23	0.0789478	3.75741	0.113679	0.913061
Adam32	0.8382	-0.584528	1.2584	0.253267
Adam8	0.613863	-0.430538	1.06903	0.324641
Adam9	0.381438	5.49327	7.09258	0.000330223
Adamts1	-1.34436	0.114413	-5.65326	0.00114888
Adamts10	0.122143	2.6566	0.298475	0.775028
Adamts13	-1.50238	-0.188649	-7.77798	0.000195496
Adamts14	0.159249	2.2661	0.959793	0.372845
Adamts15	-0.894927	1.07293	-2.72458	0.0330908
Adamts17	-0.552071	-0.22696	-1.89643	0.104806
Adamts4	-0.435901	2.34983	-1.84074	0.113352
Adamts7	0.186078	1.69459	0.81217	0.446553
Adamts8	-0.607913	0.472785	-1.66814	0.144406
Adamts9	0.204966	5.92607	1.72884	0.132645
Adamtsl1	0.123146	2.33667	0.193995	0.85234
Adamtsl4	-0.847616	0.33268	-2.6976	0.0343266
Adamtsl5	1.46004	1.45539	2.13332	0.0750771
Adap1	0.563538	5.31743	2.74722	0.0320905
Adap2	0.107836	2.68963	0.560678	0.594555
Adar	0.141935	5.95593	2.75126	0.0319154
Adarb1	-0.0355013	2.89869	-0.174656	0.866878
Adat1	0.256674	4.4643	3.36133	0.0143208
Adat2	0.445579	4.11939	2.05037	0.0843719
Adat3	0.0336643	2.97688	0.244982	0.814326
Adc	0.369879	3.359	2.49522	0.0453079
Adck1	-0.0808361	4.3499	-0.423647	0.686034
Adck2	0.335937	2.72624	1.15508	0.290351
Adck3	0.284677	2.90669	1.70061	0.137995
Adck4	-0.217867	3.44297	-0.862362	0.420379
Adck5	0.168594	4.09929	0.991682	0.358223
Adcy1	-0.607304	3.46399	-6.87804	0.000392421
Adcy3	-0.282475	3.61205	-2.06672	0.0824524
Adcy6	0.521845	3.00471	3.22132	0.0171326
Adcy9	-0.0358078	1.60287	-0.150552	0.885077
Add1	0.135401	6.71828	0.637946	0.546185
Add3	-0.197383	5.97715	-3.44408	0.0128988
Adh1	0.403507	3.8864	0.845749	0.428915
Adh5	-0.187816	7.9214	-1.9386	0.0987613
Adh7	2.12552	-0.622763	5.69382	0.00110579
Adhfe1	0.0791206	2.9	0.650921	0.538307
Adi1	0.161299	5.10133	1.75613	0.127663
Adipor1	-0.0944629	7.05924	-1.89047	0.105689
Adipor2	0.125742	8.28736	0.686518	0.517064
Adk	-0.585257	5.38047	-2.68828	0.0347649
Adnp	0.435992	0.325408	2.29727	0.0596585
Adnp2	-0.11445	6.7461	-2.23587	0.0650112
Ado	-0.0900658	6.06012	-0.947049	0.378818
Adpgk	0.0470709	6.25151	0.725783	0.494273
Adprh	0.679489	6.39384	8.86529	9.17044e-05
Adprhl2	0.0589068	5.62714	0.581549	0.581249
Adra2b	1.95003	-1.49112	1.68152	0.14173
Adrb2	-0.0757924	0.607265	-0.312813	0.764611
Adrb3	0.974264	4.1551	2.14769	0.0735756
Adrbk1	-0.163082	5.7691	-1.69424	0.13923
Adrbk2	0.0550609	1.1643	0.0956792	0.926773
Adrm1	0.0319967	6.39196	0.402872	0.700479
Adsl	-0.132974	6.94561	-1.17686	0.282167
Adss	-0.0668175	7.63234	-1.46109	0.192423
Adssl1	1.40366	2.30035	10.0087	4.49345e-05
Aebp1	1.11599	2.16151	1.81645	0.117291
Aebp2	0.573087	6.9579	3.10324	0.0199734
Aen	-0.0792657	6.42428	-0.306037	0.769527
Aes	0.44146	6.70611	7.96887	0.000170099
Afap1	0.570184	5.03538	1.55524	0.168981
Afap1l1	0.171331	1.55847	0.701753	0.50814
Afap1l2	0.880046	2.22037	2.98053	0.0234748
Aff1	-0.00881385	7.37023	-0.038498	0.970492
Aff3	-0.35725	1.12273	-0.781503	0.463108
Aff4	-0.102378	7.79263	-2.36159	0.0545374
Afg3l1	0.362866	6.42912	6.4836	0.00054516
Afg3l2	-0.149912	6.19408	-2.20082	0.0682863
Afmid	0.796292	0.948122	2.33298	0.0567566
Aftph	-0.164357	5.60574	-2.93264	0.0250163
Aga	0.34109	3.44842	2.80903	0.0295196
Agap1	-0.0709718	5.41304	-0.790716	0.45809
Agap3	0.162419	5.35947	1.79806	0.120363
Agbl5	0.141404	3.52685	1.13144	0.299455
Agfg1	0.185697	7.05387	1.52131	0.177104
Agfg2	0.271545	3.94749	1.98131	0.0929933
Aggf1	0.0321546	6.20053	0.410819	0.694936
Agk	0.0157666	6.12975	0.0704614	0.94603
Agl	-0.187358	4.75081	-3.32086	0.0150779
Agpat1	-0.149198	5.87684	-2.74275	0.0322852
Agpat2	0.680325	4.88218	4.6976	0.00300383
Agpat3	0.83916	4.48229	7.58158	0.000226269
Agpat4	-0.266559	3.18997	-2.16706	0.0716004
Agpat5	-0.0974558	6.16956	-1.2314	0.262538
Agpat6	0.296921	6.54024	5.69943	0.00109998
Agpat9	0.474891	4.12048	1.14708	0.293405
Agphd1	-0.227167	2.55922	-2.00935	0.0893904
Agps	-0.0273592	7.31655	-0.263571	0.800596
Agrn	0.465781	7.44199	3.30222	0.0154413
Agtpbp1	-0.74641	4.15116	-2.84651	0.028069
Agtrap	0.284887	7.13245	4.52571	0.00361787
Agxt2l2	0.256821	3.07161	2.20471	0.0679149
Ahctf1	0.0372733	8.33402	0.614961	0.560316
Ahcy	-0.146172	7.89863	-1.67436	0.143156
Ahcyl1	-0.19069	6.06277	-3.33324	0.0148417
Ahcyl2	0.101658	5.449	1.26294	0.251735
Ahdc1	0.0274918	5.99913	0.269547	0.796199
Ahi1	-0.627275	2.99544	-3.22779	0.0169903
Ahnak	1.16143	8.84088	5.53288	0.00128842
Ahnak2	0.815876	6.13337	2.88729	0.0265765
Ahr	-0.605155	3.9215	-5.21232	0.00176376
Ahrr	0.36655	2.7153	1.47764	0.188097
Ahsa1	-0.194004	8.13952	-3.71971	0.00917315
Ahsa2	-0.502001	4.84099	-6.23979	0.000673267
Ahsg	-0.417195	0.764999	-0.621757	0.556115
Aida	-0.142914	4.37304	-1.71518	0.135208
Aif1l	-0.775461	1.55277	-1.61393	0.155748
Aifm1	-0.144617	6.13541	-2.7809	0.0306616
Aifm2	0.499691	2.27164	2.03865	0.085777
Aifm3	0.135819	2.10121	0.619172	0.55771
Aig1	0.139806	3.44822	1.35637	0.221985
Aim1l	0.916338	3.86804	6.33333	0.000620441
Aim2	-0.217315	6.46383	-4.52537	0.0036192
Aimp1	-0.0772563	6.12025	-1.33966	0.227064
Aimp2	-0.0819036	5.47571	-1.31197	0.235712
Aip	-0.150848	4.35696	-1.86726	0.109199
Aire	-0.458264	0.253818	-1.61821	0.154823
Ak1	0.19182	6.26277	1.93415	0.0993812
Ak2	0.286792	7.59007	5.51307	0.00131318
Ak3	-1.03011	2.25562	-5.03413	0.00211218
Ak3l2-ps	-0.0978127	3.50014	-0.318527	0.760474
Ak4	-0.0818981	8.13563	-0.312057	0.765159
Ak7	1.40233	0.113173	1.79401	0.121051
Ak8	-0.231336	-0.126344	-0.801181	0.452436
Akap1	0.221898	7.98807	1.31007	0.236313
Akap10	0.0132218	5.30132	0.222023	0.831382
Akap11	0.174103	6.11879	1.86079	0.110199
Akap12	0.0225802	10.4802	0.496668	0.636428
Akap13	0.228206	5.5989	3.29783	0.0155282
Akap17b	-0.601665	3.74014	-3.41529	0.0133751
Akap5	0.588903	2.26495	1.73437	0.131622
Akap7	0.0132837	4.42439	0.0932044	0.928661
Akap8	0.0532322	7.9258	0.899523	0.401739
Akap8l	-0.127636	5.1346	-0.802679	0.451631
Akap9	-0.0723351	5.98309	-0.514864	0.624366
Akirin1	-0.131678	5.88609	-1.51558	0.178512
Akirin2	-0.103583	6.02486	-1.31057	0.236154
Akna	-0.0262904	3.58417	-0.23128	0.824492
Akr1a1	-0.0826197	7.86	-1.74468	0.129732
Akr1b10	-0.764778	1.88974	-2.60146	0.0391433
Akr1b3	0.0973675	6.94693	0.283573	0.785909
Akr1b8	1.373	1.98919	5.09959	0.00197586
Akr1e1	-0.307587	3.25844	-1.44151	0.197664
Akr7a5	-0.0593637	4.62771	-0.567098	0.590443
Akt1	-0.379835	5.49351	-2.87249	0.0271078
Akt1s1	0.166459	5.1196	1.50727	0.180572
Akt2	0.363273	6.26586	3.43085	0.0131152
Akt2-ps	0.15214	0.732571	0.597981	0.570897
Akt3	-0.883128	3.95143	-7.028	0.000347674
Aktip	0.373477	5.47458	2.77455	0.0309257
Alad	0.208734	5.03191	2.37056	0.0538606
Alas1	-0.0155969	4.61046	-0.143686	0.890275
Alcam	-2.3555	1.49469	-4.48428	0.00378614
Aldh16a1	0.110551	5.92284	1.11198	0.307127
Aldh18a1	0.108092	7.08869	0.875535	0.413699
Aldh1a2	0.160298	2.34435	0.273351	0.793403
Aldh1a3	0.196668	3.00423	0.899915	0.401546
Aldh1b1	-0.019383	4.04957	-0.0936447	0.928325
Aldh1l1	0.89305	5.8572	12.8738	9.95613e-06
Aldh1l2	0.272	2.40306	0.802643	0.45165
Aldh2	0.00532389	7.17814	0.0304877	0.97663
Aldh3a1	0.617215	0.912007	0.679789	0.521037
Aldh3a2	0.116112	5.5094	0.591459	0.574992
Aldh4a1	0.0463803	5.5643	0.436636	0.677075
Aldh5a1	0.659267	3.27199	3.43905	0.0129806
Aldh6a1	-0.166205	4.78112	-1.16741	0.285696
Aldh7a1	-0.0659976	6.35218	-0.588508	0.576852
Aldh9a1	-0.127674	6.36452	-1.979	0.093296
Aldoa	-0.373574	9.77714	-6.31826	0.000628622
Aldoc	-0.246085	3.79293	-1.37296	0.217045
Alg1	0.106755	4.66837	1.65797	0.146472
Alg10b	0.00473405	5.71372	0.0445751	0.965838
Alg11	0.129465	6.55386	1.5247	0.176278
Alg12	-0.0350169	3.54939	-0.372848	0.721595
Alg13	-0.0586854	9.06862	-1.31502	0.234745
Alg14	-0.157939	2.68607	-0.912321	0.395466
Alg2	0.184844	4.7149	2.62114	0.0381024
Alg3	-0.277081	3.8526	-2.41639	0.050535
Alg5	-0.12768	4.51121	-1.74787	0.129152
Alg6	0.147803	5.30472	2.57461	0.0406129
Alg8	-0.0439403	4.05152	-0.218859	0.833741
Alg9	-0.121542	4.65071	-1.69837	0.138429
Alkbh1	-0.0147551	5.66403	-0.228641	0.826455
Alkbh2	0.112944	3.81609	0.512454	0.625957
Alkbh3	0.160237	3.78868	1.8993	0.104382
Alkbh4	0.194215	3.92558	1.67658	0.142713
Alkbh5	-0.0588657	7.10596	-0.900027	0.401491
Alkbh6	0.0515695	4.03435	0.699628	0.509379
Alkbh7	-0.100167	3.65688	-0.882241	0.410329
Alkbh8	-0.106462	4.98723	-1.03683	0.3383
Alms1	0.37548	6.90838	1.46873	0.190415
Alms1-ps1	0.33203	0.578883	0.815243	0.444917
Alms1-ps2	0.362298	1.17873	0.937805	0.383196
Alox12	0.614237	3.10222	0.910748	0.396233
Aloxe3	-0.256984	0.0789133	-1.44906	0.195627
Alpk3	0.240516	3.99641	0.742236	0.484926
Alpl	-0.00667218	8.30955	-0.0366408	0.971915
Als2	0.0674522	6.01401	0.604863	0.566594
Als2cl	-0.133786	3.33739	-1.46015	0.192672
Als2cr4	-0.622417	3.50088	-1.70802	0.136571
Alyref	-0.118001	7.66815	-1.4408	0.197855
Amacr	-0.060569	3.7307	-0.471813	0.653102
Ambra1	0.143203	6.03393	2.39253	0.0522388
Amd-ps3	-0.14928	5.06915	-2.38144	0.0530511
Amd-ps4	-0.173126	3.55871	-1.91991	0.101396
Amd1	-0.0967729	7.54827	-2.06194	0.0830092
Amd2	-0.0727235	6.09561	-0.996218	0.35618
Amdhd2	0.374356	5.66856	2.23327	0.0652491
Amfr	0.369905	5.08093	3.9726	0.00677875
Amhr2	-0.828193	2.21006	-4.53578	0.00357824
Amigo1	0.456392	2.5202	4.17294	0.00537129
Amigo3	0.351395	1.53382	1.33587	0.228231
Ammecr1	-0.215481	4.8583	-2.13536	0.0748618
Ammecr1l	-0.0977019	4.69795	-1.44143	0.197685
Amn1	0.376993	2.67589	1.0602	0.328342
Amot	-0.486476	2.39061	-3.22314	0.0170923
Amotl1	-0.131304	4.97799	-1.2578	0.253467
Amotl2	0.913664	6.47173	4.0378	0.0062801
Ampd2	-0.107813	5.41124	-0.554039	0.598825
Ampd3	0.504532	1.95708	2.80777	0.0295701
Amph	0.0662357	3.06416	0.400618	0.702054
Amt	0.081317	7.14129	0.746178	0.482705
Amz1	0.00515025	0.186559	0.0204816	0.984298
Amz2	-0.00978367	5.18508	-0.116894	0.910615
Anapc1	-0.026712	7.84426	-0.504093	0.631491
Anapc10	0.276745	5.56528	1.84436	0.112776
Anapc11	0.00528506	5.45725	0.0707113	0.945839
Anapc13	0.0884533	3.78763	0.965271	0.370301
Anapc16	0.00132324	4.64416	0.011527	0.991163
Anapc2	0.163908	5.5574	1.8164	0.1173
Anapc4	-0.0297437	6.3342	-0.590862	0.575368
Anapc5	-0.0272373	8.40582	-0.60442	0.56687
Anapc7	-0.0782914	6.39142	-1.36987	0.217958
Angel1	0.0344111	3.02644	0.326946	0.754395
Angel2	-0.100972	5.32631	-0.850431	0.426496
Angptl2	-0.0125887	1.52497	-0.0645394	0.950558
Angptl4	-0.0498048	4.07111	-0.278107	0.789914
Angptl6	0.210575	1.23658	0.989271	0.359313
Ank	-0.389955	2.86323	-0.940097	0.382107
Ank2	-0.380014	3.81602	-2.72195	0.0332092
Ank3	0.253855	4.82487	1.7343	0.131633
Ankfy1	0.118092	6.5791	2.2675	0.0621951
Ankhd1	0.116759	7.22043	2.36951	0.0539395
Ankib1	-0.0769277	5.47853	-1.28732	0.24365
Ankle1	0.571984	4.62925	6.6735	0.000464473
Ankle2	-0.265904	6.68727	-5.53728	0.00128301
Ankmy2	0.0394599	5.40969	0.47522	0.650803
Ankra2	-0.00294741	3.73521	-0.0228272	0.9825
Ankrd10	0.549276	7.29253	9.14208	7.66104e-05
Ankrd11	0.433866	8.3533	6.71441	0.000448928
Ankrd12	-0.0907978	4.83319	-0.703995	0.506836
Ankrd13a	-0.0474513	6.92218	-0.49974	0.634383
Ankrd13b	-0.289951	1.66848	-1.02111	0.345133
Ankrd13c	-0.171956	5.95083	-1.86472	0.109591
Ankrd13d	-0.639729	1.75038	-1.68559	0.140926
Ankrd16	0.00343011	4.38042	0.0252821	0.980619
Ankrd17	0.0409034	7.58265	0.952061	0.37646
Ankrd23	0.182923	0.707863	0.97353	0.36649
Ankrd24	0.178654	4.19361	1.4286	0.201188
Ankrd26	0.234289	5.04727	0.798435	0.453915
Ankrd27	-0.122583	5.89258	-1.07841	0.320746
Ankrd28	0.0523742	6.2478	0.634995	0.547987
Ankrd32	-0.272531	5.09281	-3.26369	0.0162228
Ankrd33b	-0.135787	1.93375	-0.238492	0.819137
Ankrd35	-1.30382	5.23475	-5.76134	0.00103806
Ankrd37	-0.58179	1.63813	-3.86434	0.00770668
Ankrd39	-0.0883026	2.22046	-0.515709	0.623809
Ankrd40	-0.123159	5.25499	-1.97992	0.0931755
Ankrd42	-0.129872	0.893681	-0.72735	0.493378
Ankrd45	0.0097659	2.05144	0.0221541	0.983016
Ankrd46	-0.150605	4.70687	-1.60939	0.156738
Ankrd49	0.148896	4.82094	1.91499	0.1021
Ankrd50	-0.124056	5.02568	-1.43082	0.200578
Ankrd52	0.379407	4.59695	5.26755	0.00166932
Ankrd54	0.0310241	4.51307	0.412218	0.693963
Ankrd6	-0.0297403	5.04813	-0.417035	0.690616
Ankrd9	0.0898611	3.7781	1.253	0.255098
Anks1	0.40943	5.11555	2.9901	0.0231791
Anks3	0.067801	4.40915	0.745891	0.482866
Anks6	1.18146	-0.503078	2.17335	0.0709708
Ankzf1	-0.255933	4.43993	-2.34169	0.0560714
Anln	-0.0314943	7.78115	-0.71981	0.497696
Ano1	-1.27815	1.71958	-4.97289	0.00224938
Ano10	0.412187	-0.002519	1.30822	0.236904
Ano3	-2.10417	0.996306	-15.3554	3.41295e-06
Ano6	0.520677	5.69723	9.42806	6.39361e-05
Ano8	0.486358	3.81276	1.83776	0.113829
Ano9	0.282248	6.001	3.79483	0.00837625
Anp32a	-0.260041	8.19073	-4.59737	0.00334621
Anp32b	-0.169368	6.9038	-1.99443	0.0912894
Anp32b-ps1	-0.0850717	1.96559	-0.537507	0.609531
Anp32e	-0.361618	7.2037	-5.70752	0.00109165
Anpep	0.405135	-0.075425	0.801296	0.452374
Antxr1	-0.197991	2.67042	-0.535939	0.610552
Anubl1	-0.0584672	1.97144	-0.363564	0.72818
Anxa1	0.233311	2.78628	0.251992	0.80914
Anxa11	0.209103	5.32279	0.744711	0.48353
Anxa2	1.57214	2.22652	10.3194	3.74852e-05
Anxa4	0.768441	4.28581	3.85005	0.00783935
Anxa5	0.844795	4.10286	6.24882	0.00066795
Anxa6	0.398947	7.79757	5.63091	0.00117344
Anxa7	0.233727	6.77277	1.41698	0.204409
Anxa8	-0.275391	2.23908	-1.43216	0.200209
Anxa9	1.49901	0.586487	1.64208	0.149757
Aoah	1.33207	3.93548	2.4996	0.045034
Aoc2	0.0713878	1.31291	0.228524	0.826542
Aox1	0.18811	0.936871	0.575277	0.585229
Aox3	1.5906	3.19355	0.987896	0.359935
Ap1ar	0.031483	5.74318	0.350783	0.737287
Ap1b1	0.106697	6.19921	0.897024	0.402973
Ap1g1	0.365353	6.9704	7.71732	0.000204457
Ap1g2	0.0908802	3.47409	0.479806	0.647715
Ap1m1	0.256812	5.92692	4.34466	0.0044212
Ap1m2	0.768993	5.63047	2.50126	0.0449312
Ap1s1	0.146094	4.91453	1.64543	0.149059
Ap1s2	-0.438324	4.56245	-6.27491	0.000652857
Ap1s3	-0.724081	0.755638	-2.17559	0.0707479
Ap2a1	-0.0364856	6.82391	-0.709528	0.503626
Ap2a2	0.059149	7.76823	1.32796	0.230684
Ap2b1	0.024605	7.38553	0.520698	0.620525
Ap2m1	-0.00373105	7.32025	-0.0641741	0.950838
Ap2s1	0.0607521	5.54719	0.817148	0.443905
Ap3b1	0.152025	7.459	2.66374	0.0359472
Ap3b2	0.532104	4.91478	3.37302	0.0141099
Ap3d1	0.132761	7.45375	2.84806	0.0280105
Ap3m1	0.04854	6.09684	0.940375	0.381975
Ap3m2	0.601281	3.52468	1.44452	0.196848
Ap3s1	-0.214676	4.81159	-3.11231	0.019738
Ap3s1-ps1	0.0285613	1.16929	0.180264	0.862655
Ap3s1-ps2	-0.199198	1.26781	-0.873495	0.414728
Ap3s2	-0.143676	5.43271	-1.26964	0.249491
Ap4b1	-0.00684688	4.78684	-0.0801935	0.938593
Ap4e1	-0.0607158	4.86261	-0.804899	0.450439
Ap4m1	0.145462	5.12544	2.07399	0.0816123
Ap4s1	-0.410922	2.85494	-1.43127	0.200455
Apaf1	0.0587339	6.33244	1.2051	0.271852
Apba2	-2.5073	1.14842	-10.9147	2.68423e-05
Apba3	-0.0854855	4.88476	-1.51623	0.178353
Apbb1	0.298273	4.17704	1.68613	0.14082
Apbb2	0.0764103	5.60975	1.13336	0.298706
Apbb3	0.228914	3.96676	2.045	0.0850135
Apc	0.204686	7.50054	2.43316	0.0493727
Apc2	-0.0798984	1.00829	-0.375389	0.719798
Apcdd1	-9.33277e-05	2.93877	-0.000158638	0.999878
Apeh	0.0965913	5.2626	1.39177	0.211563
Apex1	-0.221068	7.98161	-5.31885	0.00158667
Apex2	-0.0488078	4.38446	-0.627437	0.552618
Aph1a	0.100027	5.34807	1.62188	0.154034
Aph1b	-0.438857	0.849951	-1.86818	0.109058
Aph1c	0.290454	1.86942	0.907084	0.398024
Api5	-0.081474	7.88001	-1.70683	0.136798
Apip	-0.2355	3.92807	-1.96166	0.0956038
Apitd1	0.0783308	4.05121	0.725498	0.494436
Aplf	0.33504	4.37405	1.38102	0.214679
Aplp1	0.135251	3.86565	1.36867	0.218312
Aplp2	-0.196637	8.4456	-4.07478	0.00601546
Apoa1bp	-0.13459	4.6858	-2.31374	0.0583013
Apoa2	-0.410813	3.94285	-1.08291	0.318893
Apobec1	-0.157746	2.21239	-1.03942	0.337183
Apobec2	0.949101	3.43763	4.75713	0.0028192
Apobec3	-0.0847991	6.26356	-1.64153	0.149873
Apobr	0.639922	1.86577	1.32172	0.232634
Apoc1	0.460604	4.09292	4.54964	0.0035245
Apoc2	0.118639	0.439194	0.296567	0.776418
Apod	0.217285	1.85118	0.642455	0.543439
Apoe	0.132367	10.1654	1.37325	0.21696
Apol6	0.0126232	1.1379	0.0571765	0.956191
Apol7d	0.366013	0.687685	1.88944	0.105842
Apold1	-0.433945	1.02728	-1.41187	0.205842
Apoo	-0.0909105	3.32461	-0.75208	0.479392
Apoo-ps	-0.147097	3.00557	-1.25216	0.255384
Apool	-0.173828	4.40143	-2.1104	0.0775368
App	0.190864	5.19006	0.30005	0.773881
Appbp2	-0.0567563	7.25666	-0.800064	0.453037
Appl1	0.0687277	6.47454	1.35704	0.221784
Appl2	-0.121912	4.12388	-1.81414	0.117673
Aprt	0.0682872	7.05335	0.721956	0.496464
Aptx	0.00251403	3.63804	0.0258403	0.980191
Aqp11	0.316827	1.20336	1.03763	0.337955
Aqp3	0.595519	6.77948	1.71619	0.135017
Aqp8	0.348911	1.70581	1.19949	0.273877
Aqp9	2.60514	-0.080409	1.39535	0.210533
Aqr	-0.0512321	7.28517	-0.768671	0.470162
Araf	0.0271914	5.92486	0.394884	0.706069
Arap1	0.464765	4.79353	1.24856	0.256612
Arap2	-0.349259	3.98636	-1.60568	0.157548
Arc	0.764458	3.52635	1.801	0.119868
Arcn1	0.10522	8.46643	1.13652	0.297479
Arf1	0.0359317	8.10236	0.68623	0.517233
Arf2	-0.0838349	4.77679	-1.41661	0.204513
Arf3	0.119662	6.5627	1.95857	0.0960203
Arf4	-0.0906399	6.4294	-1.45069	0.195191
Arf5	0.200656	6.03207	0.933002	0.385486
Arf6	-0.160978	7.59449	-3.65815	0.00988883
Arfgap1	0.220684	5.93637	1.76933	0.12532
Arfgap2	-0.00570086	5.83391	-0.0978479	0.92512
Arfgap3	0.513853	4.27622	5.14022	0.00189627
Arfgef1	-0.0459321	5.7761	-0.381908	0.715194
Arfgef2	0.221373	6.19462	2.51847	0.0438762
Arfip1	-0.0338208	4.99068	-0.552596	0.599755
Arfip2	0.0370514	5.30174	0.351466	0.736799
Arfrp1	-0.0165903	4.50291	-0.200874	0.847183
Arglu1	0.194717	6.70221	3.84636	0.00787403
Arhgap1	0.277036	6.46835	2.18324	0.0699923
Arhgap10	-0.180753	2.01582	-1.1773	0.282006
Arhgap11a	-0.021913	6.01467	-0.408264	0.696716
Arhgap12	-0.0973015	6.44534	-1.94331	0.098108
Arhgap17	-0.0222575	5.6079	-0.214659	0.836875
Arhgap18	-0.236517	0.98849	-0.846722	0.428411
Arhgap19	-0.114752	6.44314	-1.2012	0.273259
Arhgap20	-0.91645	0.0229257	-3.18228	0.0180199
Arhgap21	0.000611884	6.28997	0.0134822	0.989664
Arhgap22	0.0617697	0.38519	0.203919	0.844903
Arhgap23	0.167026	4.52344	1.83555	0.114183
Arhgap26	-0.403994	2.30922	-2.53296	0.0430087
Arhgap27	-0.198794	1.66512	-0.672355	0.52545
Arhgap28	0.285593	3.75052	1.46827	0.190536
Arhgap29	-0.301942	2.60235	-1.15399	0.290763
Arhgap30	0.569973	2.53982	1.50577	0.180947
Arhgap31	-1.23923	-0.686331	-4.63353	0.00321789
Arhgap32	0.262638	6.09257	5.0101	0.00216486
Arhgap39	-0.135927	4.4187	-1.11895	0.304362
Arhgap4	0.338404	2.11224	2.28191	0.0609534
Arhgap42	-0.0275893	4.50792	-0.399884	0.702567
Arhgap44	0.103024	2.60625	0.40995	0.695541
Arhgap5	-0.075399	7.42349	-1.26724	0.25029
Arhgap8	1.0603	4.14004	7.2478	0.000292223
Arhgap9	0.808414	3.3694	3.00603	0.0226959
Arhgdia	0.0458119	7.87578	0.539378	0.608314
Arhgef1	0.232524	5.68532	2.65416	0.0364205
Arhgef10	0.581398	2.52097	3.7658	0.00867477
Arhgef10l	0.317031	5.2083	5.13297	0.0019102
Arhgef11	0.015202	5.32641	0.221814	0.831538
Arhgef12	0.147142	6.48055	2.0574	0.0835417
Arhgef15	-0.168693	3.20596	-0.880739	0.411082
Arhgef16	1.01637	4.14107	9.06177	8.06741e-05
Arhgef17	0.523714	4.63138	5.80822	0.000993804
Arhgef18	0.617389	7.53126	5.56103	0.00125415
Arhgef19	0.819425	3.1818	2.19012	0.0693197
Arhgef2	0.281544	6.02071	2.54225	0.0424616
Arhgef25	0.334484	4.90728	1.1497	0.292399
Arhgef3	0.326125	3.67887	1.7798	0.123491
Arhgef4	-0.319107	1.38887	-0.884668	0.409115
Arhgef5	0.0437018	2.95104	0.0932576	0.92862
Arhgef7	0.521332	5.67463	8.77627	9.72665e-05
Arid1a	0.0263531	6.24344	0.393515	0.707029
Arid1b	-0.429964	5.36785	-6.94881	0.000370532
Arid2	-0.291888	6.39589	-5.98155	0.000847794
Arid3a	0.287923	5.06616	3.90419	0.0073496
Arid3b	-0.509943	5.351	-9.65885	5.54475e-05
Arid4a	-0.0961585	5.41461	-1.61864	0.154732
Arid4b	-0.148888	5.84834	-2.00745	0.0896307
Arid5a	0.0949557	3.13902	0.8639	0.419595
Arid5b	-0.0395597	7.13021	-0.581732	0.581133
Arih1	-0.0701234	7.08988	-1.32475	0.231683
Arih2	0.0359895	7.99433	0.18483	0.859222
Arl1	-0.0685009	6.57667	-1.17269	0.28372
Arl10	-0.0693075	2.88851	-0.697185	0.510805
Arl11	1.12506	0.467943	2.45112	0.0481583
Arl13b	-0.114135	4.72332	-1.88862	0.105965
Arl15	-0.175386	5.91929	-2.71388	0.033575
Arl16	-0.0730119	2.89052	-0.70749	0.504807
Arl2	-0.115177	4.18079	-1.1243	0.302251
Arl2bp	0.140933	4.95124	1.03867	0.337507
Arl3	-0.177632	4.73481	-2.38377	0.0528794
Arl4a	-0.498391	4.68533	-7.48828	0.00024281
Arl4c	0.367818	1.87386	1.87528	0.107974
Arl4d	1.08196	0.96456	1.98159	0.0929557
Arl5a	-0.204315	6.27107	-3.19676	0.0176852
Arl5b	-0.220964	6.67623	-2.09707	0.0790045
Arl5c	-0.400569	1.93446	-2.5519	0.0419014
Arl6	-0.288199	4.25045	-2.29031	0.0602416
Arl6ip1	0.00342625	8.6744	0.0637095	0.951193
Arl6ip4	-0.204999	4.96563	-2.76816	0.0311937
Arl6ip5	0.157112	4.57031	0.499778	0.634358
Arl6ip6	-0.105455	5.57252	-1.56171	0.167472
Arl8a	-0.386905	4.13518	-1.94239	0.0982345
Arl8b	0.190262	6.95108	0.956874	0.374207
Armc1	-0.234525	6.14532	-3.1744	0.0182052
Armc10	-0.10545	6.69823	-1.47934	0.187656
Armc5	0.131514	4.23162	0.790105	0.458421
Armc6	0.526895	4.52706	3.36559	0.0142436
Armc7	-0.252294	2.68216	-2.26312	0.0625773
Armc8	-0.0702492	6.1121	-1.41758	0.204241
Armc9	-0.174474	3.77853	-1.59308	0.160334
Armcx1	-0.327865	4.41263	-1.86075	0.110205
Armcx2	-0.662676	3.95827	-9.39319	6.53444e-05
Armcx3	-0.078982	1.15472	-0.143954	0.890072
Armcx4	-0.185546	3.83779	-1.94546	0.0978113
Armcx5	-0.072873	3.70981	-0.483265	0.645391
Armcx6	-0.0984762	0.268414	-0.26132	0.802255
Arnt	-0.0878214	5.94806	-0.739752	0.48633
Arnt2	-0.819867	0.524678	-2.95631	0.024241
Arntl	-0.331296	4.92161	-2.48615	0.045879
Arntl2	-2.47247	1.44855	-4.71991	0.00293308
Arpc1a	0.0166834	6.13712	0.308419	0.767797
Arpc1b	-0.113366	6.6672	-0.600588	0.569264
Arpc2	0.023561	6.82923	0.347355	0.739738
Arpc3	-0.0934739	6.47988	-1.3431	0.22601
Arpc4	0.222068	6.93705	0.968316	0.368892
Arpc5	-0.220931	6.29125	-3.61678	0.0104042
Arpc5l	0.106512	5.4027	1.28652	0.243911
Arpp19	-0.197838	6.52891	-3.57518	0.0109524
Arrb1	-0.279066	1.69957	-0.565413	0.591521
Arrb2	0.135225	5.25747	1.50287	0.18167
Arrdc1	0.23631	3.08662	2.07121	0.0819325
Arrdc2	0.635075	4.62647	10.0533	4.37653e-05
Arrdc3	-0.0358968	7.23389	-0.637407	0.546514
Arrdc4	-0.0899627	5.10009	-0.280643	0.788055
Arsa	0.187203	4.2377	1.35255	0.223139
Arsg	0.55323	0.584773	1.77358	0.124576
Arsk	0.0753001	2.76595	0.346698	0.740207
Art5	0.675269	1.41561	3.33071	0.0148897
Arv1	0.485932	3.04443	3.26296	0.0162382
Arvcf	0.962963	6.00977	11.228	2.26666e-05
Arxes1	-0.764138	3.08933	-5.61702	0.001189
Arxes2	-0.713235	3.84984	-4.14937	0.00551869
As3mt	-0.197007	2.7059	-1.27365	0.248156
Asah1	0.236664	8.16545	0.911492	0.39587
Asap1	0.155113	5.21935	1.77943	0.123555
Asap2	0.0755425	4.51429	0.569975	0.588606
Asap3	0.495989	3.9707	5.74068	0.00105827
Asb1	0.117902	4.41938	1.62008	0.154421
Asb13	0.0443848	3.16516	0.309299	0.767159
Asb16	-0.200755	0.887785	-0.992113	0.358028
Asb3	-0.205859	3.91276	-2.60713	0.0388404
Asb6	0.163974	5.07922	2.25095	0.063653
Asb7	-0.0901468	4.74406	-1.38987	0.21211
Asb8	0.246498	5.12957	2.30881	0.0587045
Ascc1	-0.0639789	4.50697	-0.87577	0.413581
Ascc2	0.00821794	5.12319	0.0983401	0.924744
Ascc3	-0.0575643	6.59494	-1.11454	0.306109
Ascl2	0.928972	0.683886	2.52989	0.0431911
Asf1a	-0.265684	5.39878	-4.77895	0.00275475
Asf1b	0.27473	5.40151	2.21643	0.0668077
Ash1l	0.187337	5.39135	2.5463	0.0422254
Ash2l	0.471036	8.95829	4.93534	0.00233846
Asl	-0.394597	4.26198	-4.11023	0.00577342
Asna1	0.410508	7.91275	9.68753	5.44865e-05
Asns	0.0363653	10.3595	0.349442	0.738245
Asnsd1	-0.103835	6.45247	-2.0679	0.0823153
Aspa	0.588107	2.25185	0.513108	0.625524
Aspg	0.559612	0.486684	2.90797	0.0258522
Asph	-0.385902	5.37451	-6.24928	0.000667681
Asphd2	-0.805436	-0.195665	-3.35176	0.0144959
Aspm	-0.0156947	7.10784	-0.115684	0.911535
Asprv1	0.288468	-0.0181785	1.30015	0.239488
Aspscr1	-0.177222	6.50498	-2.56703	0.0410383
Asrgl1	-0.546658	4.2521	-4.08261	0.00596105
Ass1	0.404963	7.8028	5.19153	0.00180086
Aste1	0.177608	4.17391	1.73052	0.132333
Asxl1	0.0148541	6.98768	0.234541	0.82207
Asxl2	0.0137056	6.6587	0.278225	0.789827
Asxl3	0.221387	1.96813	1.41612	0.204651
Asz1	-1.04679	-0.338642	-3.21948	0.0171733
Atad1	-0.301522	6.44324	-2.30071	0.0593722
Atad2	0.147474	8.28951	2.78361	0.0305494
Atad2b	0.0131893	5.71956	0.0617472	0.952694
Atad3a	-0.102474	6.82743	-0.786324	0.460477
Atad5	-0.133531	6.71571	-1.51916	0.177631
Atat1	0.165239	3.20257	0.878963	0.411974
Ate1	0.0205019	5.65633	0.300951	0.773226
Atf1	0.194795	5.7133	2.34056	0.0561603
Atf2	-0.0768918	6.45429	-1.08418	0.318371
Atf3	0.926124	1.50495	1.63163	0.151956
Atf4	0.126591	8.37254	1.42582	0.201956
Atf5	-0.268354	3.60049	-0.994058	0.357152
Atf6	-0.11104	5.34453	-1.38023	0.214909
Atf6b	0.0513586	5.45178	0.581613	0.581209
Atf7	0.376736	2.75657	2.13854	0.0745284
Atf7ip	0.260609	6.51879	3.07064	0.0208449
Atf7ip2	-0.441231	3.47228	-1.63467	0.151312
Atg10	0.438625	1.05192	1.2331	0.261948
Atg12	-0.14795	5.85817	-2.76947	0.0311384
Atg13	0.402834	6.0555	1.92381	0.10084
Atg14	0.465868	5.64641	1.25376	0.254839
Atg16l1	0.0315161	6.19968	0.50293	0.632263
Atg16l2	0.731766	2.63085	1.83457	0.114341
Atg2a	0.525535	6.17552	2.55162	0.0419173
Atg2b	0.085988	6.31055	1.82604	0.115721
Atg3	-0.0890226	4.54337	-0.974828	0.365894
Atg4a	-0.352642	2.01216	-3.25176	0.0164735
Atg4a-ps	0.0499124	0.408639	0.188501	0.856463
Atg4b	0.436384	6.07854	2.32713	0.0572221
Atg4c	0.295855	3.16061	2.43968	0.0489279
Atg4d	0.151158	5.02687	1.85945	0.110407
Atg5	-0.142274	5.5155	-1.25542	0.254274
Atg7	0.313326	4.36211	1.97936	0.0932487
Atg9a	-0.247467	3.47603	-2.25931	0.062912
Atg9b	-0.516134	3.05868	-2.01205	0.089052
Athl1	0.037299	4.65679	0.514073	0.624888
Atic	-0.0929719	7.95673	-0.504458	0.631249
Atl1	-0.0941659	0.983604	-0.518881	0.62172
Atl2	-0.137871	5.71692	-2.52282	0.043614
Atl3	-0.129578	5.72053	-1.51165	0.179484
Atm	0.274422	6.95384	4.84527	0.00256879
Atmin	0.131764	7.18941	1.04359	0.335393
Atn1	0.484754	2.78613	2.22562	0.0659521
Atox1	-0.304299	5.78212	-3.89075	0.00746799
Atp10a	0.0483785	4.06394	0.707941	0.504545
Atp10d	0.404823	3.82	2.03261	0.0865099
Atp11a	0.509544	5.45972	4.28545	0.00472579
Atp11b	0.174719	5.9497	2.9533	0.0243382
Atp11c	-0.0193971	5.64086	-0.345371	0.741157
Atp12a	1.29543	1.09095	6.82363	0.000410258
Atp13a1	0.44731	7.08016	7.84714	0.000185822
Atp13a2	0.113854	5.25455	0.889208	0.40685
Atp13a3	0.0223889	7.87993	0.138809	0.893972
Atp1a1	-0.115932	8.95301	-2.8458	0.0280954
Atp1a2	-0.244292	0.120719	-0.350925	0.737186
Atp1a3	1.21963	-0.362644	1.68548	0.140949
Atp1b1	-0.171646	7.34989	-1.76041	0.1269
Atp1b2	0.592186	0.719912	1.68573	0.140899
Atp1b3	-0.0821856	6.4291	-0.709414	0.503692
Atp2a2	-0.269876	8.36963	-6.66434	0.000468036
Atp2a3	1.0582	5.55	3.96006	0.00687961
Atp2b1	-0.108967	7.52549	-2.37027	0.0538825
Atp2b2	0.926018	0.314795	0.697597	0.510564
Atp2b4	-1.13142	4.80823	-6.28426	0.000647537
Atp2c1	-0.132446	7.20373	-1.45519	0.193988
Atp5a1	-0.0215745	10.4336	-0.463088	0.659008
Atp5b	-0.075309	10.8992	-1.66984	0.144064
Atp5c1	-0.070357	8.39291	-1.38428	0.21373
Atp5d	-0.110075	6.75224	-1.35315	0.222955
Atp5e	-0.0498325	5.98694	-0.41361	0.692995
Atp5f1	-0.0614845	8.02524	-1.2044	0.272104
Atp5g1	0.0976567	7.31255	1.87824	0.107524
Atp5g2	-0.0500193	6.401	-0.718941	0.498196
Atp5g3	0.0069451	7.77765	0.083433	0.936119
Atp5h	-0.187197	7.10983	-3.58817	0.0107779
Atp5j	-0.111342	6.34967	-1.6393	0.150339
Atp5j2	0.0296269	7.18897	0.642101	0.543654
Atp5k	-0.11762	6.57505	-1.93807	0.0988342
Atp5l	-0.014638	5.89293	-0.218497	0.834011
Atp5l-ps1	0.331598	0.552673	1.37817	0.215513
Atp5l2	0.00729409	2.76755	0.0401413	0.969234
Atp5o	0.0248533	7.86361	0.48432	0.644684
Atp5s	0.170561	1.86101	0.677758	0.522241
Atp5sl	0.00719134	5.14401	0.110476	0.915499
Atp6ap1	-0.067809	6.76783	-0.427024	0.683699
Atp6ap2	-0.0172615	7.29418	-0.119505	0.908629
Atp6v0a1	0.107954	4.9317	1.06437	0.32659
Atp6v0a2	0.0408432	5.66186	0.645038	0.54187
Atp6v0a4	0.673377	3.08179	6.64043	0.000477487
Atp6v0b	-0.0215493	6.41845	-0.376492	0.719017
Atp6v0c	-0.0546006	7.56479	-0.597458	0.571225
Atp6v0d1	0.270891	6.35312	5.19118	0.00180148
Atp6v0e	-0.00954484	5.42334	-0.136394	0.895803
Atp6v0e2	-0.0148723	3.86241	-0.0456754	0.964995
Atp6v1a	-0.232778	7.81478	-0.980131	0.363466
Atp6v1b1	1.42168	-1.29055	1.48039	0.187387
Atp6v1b2	0.368307	7.71082	6.30819	0.000634163
Atp6v1c1	-0.0497858	6.85281	-0.447437	0.669669
Atp6v1d	-0.00516407	6.28129	-0.0238742	0.981698
Atp6v1e1	-0.0463327	6.92004	-0.238759	0.818938
Atp6v1f	0.187226	6.11712	0.996202	0.356187
Atp6v1g1	-0.0885961	6.71272	-0.947371	0.378666
Atp6v1h	-0.441373	6.63007	-5.27386	0.00165889
Atp7a	-0.0961942	4.94535	-0.706601	0.505322
Atp7b	0.417652	3.47609	1.03292	0.33999
Atp8a1	-0.34028	4.51104	-5.08151	0.0020125
Atp8b2	-0.701222	7.90434	-5.79489	0.00100616
Atp9a	0.407041	6.24079	2.19278	0.0690614
Atp9b	-0.109489	5.48642	-1.5077	0.180463
Atpaf1	-0.146501	4.44247	-1.79715	0.120518
Atpaf2	0.082649	4.88413	0.799746	0.453208
Atpbd4	0.00117769	4.46159	0.0138756	0.989362
Atpif1	-0.0539654	6.84685	-0.843389	0.430138
Atr	0.154224	6.74708	2.19899	0.068462
Atrip	-0.0832514	4.60366	-0.922714	0.390426
Atrn	0.161746	4.7997	1.4114	0.205973
Atrnl1	0.25294	4.73019	2.50238	0.0448615
Atrx	0.085792	8.85559	2.02655	0.0872505
Atxn10	0.321366	7.74717	2.27947	0.0611623
Atxn1l	-0.00048007	5.50562	-0.00927509	0.992889
Atxn2	0.0627869	5.02521	0.693748	0.512816
Atxn2l	0.173635	6.55227	2.4447	0.0485887
Atxn3	0.0447058	6.65131	0.51451	0.624599
Atxn7	-0.034957	3.68628	-0.239202	0.81861
Atxn7l1	0.170043	2.50623	0.762459	0.473603
Atxn7l2	0.0227476	3.58726	0.10134	0.922458
Atxn7l3	-0.108697	6.94766	-1.1661	0.286185
Atxn7l3b	-0.0949517	6.34102	-1.94374	0.0980483
Auh	0.106336	4.74719	0.580185	0.582113
Aup1	0.226158	5.60145	0.893287	0.404823
Aurka	-0.126857	7.01038	-1.97166	0.0942662
Aurkaip1	-0.108334	5.81872	-1.748	0.12913
Aurkb	-0.271312	6.29567	-1.59849	0.159131
Aurkc	1.00358	-0.140765	1.25153	0.255597
Auts2	0.00544589	4.35734	0.0557098	0.957314
Aven	-0.0948854	4.49436	-1.15729	0.289511
Avil	0.545642	-0.758618	0.914505	0.394403
Avl9	0.0966008	6.86769	0.479118	0.648179
Avpi1	-0.193103	5.92385	-1.94275	0.0981849
Axin1	-0.0455892	6.38008	-0.62882	0.551769
Axin2	0.0625107	5.74188	0.427167	0.683601
Axl	1.09893	1.03321	1.64981	0.14815
Azi1	0.0205075	3.81823	0.172306	0.868648
Azi2	-0.144703	5.5101	-2.04182	0.0853942
Azin1	-0.249449	7.46906	-3.37444	0.0140845
B130006D01Rik	0.837871	-0.0748837	3.13801	0.0190871
B130055M24Rik	-0.105499	1.60707	-0.513926	0.624985
B230118H07Rik	-0.118433	3.11619	-0.729845	0.491954
B230120H23Rik	-0.939214	4.45225	-4.63672	0.00320684
B230206F22Rik	0.0316854	1.38831	0.134736	0.897061
B230206L02Rik	-0.366207	1.01381	-1.394	0.210919
B230208H17Rik	0.0332758	5.7673	0.27427	0.792728
B230217C12Rik	-0.123613	1.11957	-0.622637	0.555572
B230219D22Rik	0.0613051	6.69966	0.920542	0.391475
B230307C23Rik	-0.0733555	3.17249	-0.45971	0.661302
B230312A22Rik	0.10402	3.31254	0.394519	0.706326
B230312C02Rik	-0.553665	0.0340846	-1.1982	0.274342
B230314M03Rik	-2.1256	0.618501	-6.86791	0.000395672
B230325K18Rik	0.727379	0.752358	3.54436	0.0113792
B230354K17Rik	0.0901459	5.94243	0.498727	0.635057
B2m	0.23013	4.62565	0.598851	0.570352
B330016D10Rik	0.0451967	0.0405782	0.173253	0.867934
B3galnt1	-0.596512	1.55577	-1.22985	0.263082
B3galnt2	-0.30364	5.76606	-2.37441	0.0535728
B3galt4	0.139031	2.26395	0.674111	0.524405
B3galt6	0.132036	3.9069	1.37697	0.215866
B3galtl	0.016591	5.28307	0.0849922	0.934928
B3gat3	-0.19448	4.07205	-0.739766	0.486322
B3gnt1	0.0495793	4.02076	0.657481	0.534351
B3gnt2	-0.782323	0.152655	-3.38565	0.0138857
B3gnt3	-0.608615	3.19365	-4.31708	0.00456027
B3gnt5	-0.224328	5.56825	-2.25418	0.0633658
B3gnt7	0.00990939	4.76083	0.0204094	0.984354
B3gnt8	0.706479	-0.720451	1.05617	0.330042
B3gnt9-ps	-0.093252	-0.00268546	-0.279574	0.788838
B3gntl1	-0.0238994	3.8224	-0.137444	0.895007
B4galnt1	-0.0259028	1.31005	-0.0645319	0.950564
B4galnt2	0.492192	-0.121101	1.00669	0.351498
B4galnt3	0.908053	6.61098	6.08378	0.000773186
B4galnt4	-0.211683	7.01019	-1.59477	0.159957
B4galt1	0.167739	5.57438	0.893573	0.404682
B4galt2	-0.0687618	2.69487	-0.277046	0.790692
B4galt3	0.0330247	4.9745	0.447619	0.669544
B4galt4	-0.509858	2.39257	-3.67588	0.00967653
B4galt5	0.520494	6.03072	3.84931	0.00784626
B4galt6	-0.14979	7.25813	-3.28675	0.01575
B4galt7	-0.151024	3.94826	-2.07419	0.0815895
B630005N14Rik	-0.196052	4.71585	-1.02393	0.343898
B930036N10Rik	0.709463	0.176427	1.37796	0.215574
B930041F14Rik	0.492604	3.49064	4.62929	0.00323265
B9d1	-0.223988	3.28741	-1.85143	0.11166
B9d2	-0.251509	1.41473	-1.60285	0.15817
BC002059	-0.0508466	4.07125	-0.353294	0.735494
BC002163	-0.13143	2.69655	-0.85773	0.422746
BC002230	0.096558	5.50097	0.799692	0.453238
BC003266	-0.140409	4.61175	-1.22396	0.265146
BC003331	-0.092749	4.69377	-1.31625	0.234355
BC003965	-0.0130474	5.16095	-0.250651	0.810131
BC004004	0.24039	4.53576	2.82836	0.0287619
BC005537	0.284087	6.84267	3.43448	0.0130554
BC005561	0.0356817	4.66665	0.26356	0.800604
BC005624	0.148216	5.09183	2.44299	0.0487038
BC013529	-0.363369	3.64973	-3.97528	0.00675736
BC016423	-0.613193	6.04902	-9.21877	7.29486e-05
BC016495	0.087546	4.62092	0.371216	0.722751
BC017158	0.129589	3.81804	1.18929	0.277587
BC017612	-0.358719	1.03996	-1.10518	0.309846
BC017643	-0.265597	4.17482	-3.85851	0.0077605
BC017647	-0.00987417	3.88224	-0.0723495	0.944586
BC018242	-0.59489	1.01379	-2.08677	0.080158
BC018507	0.249447	7.02708	3.53395	0.0115274
BC021614	0.329256	1.20755	1.84647	0.112442
BC021891	0.867131	-0.836814	1.21836	0.267122
BC022687	-0.0238067	2.40807	-0.1085	0.917003
BC023829	-0.0742132	3.61594	-0.562687	0.593267
BC024479	0.21761	5.32268	3.75281	0.0088122
BC024659	-0.151273	3.90884	-2.07369	0.0816475
BC024978	0.084641	3.13657	0.246316	0.813338
BC025920	0.56332	0.232862	2.05111	0.0842844
BC026585	0.250764	2.05311	1.44919	0.195592
BC026590	-0.203863	3.60716	-2.28671	0.0605455
BC027231	0.0287023	5.74146	0.378653	0.717491
BC028528	1.04183	1.59797	2.52957	0.04321
BC029214	0.409572	0.602218	1.97095	0.0943608
BC029722	0.129048	1.6813	0.920593	0.391451
BC030307	-0.529003	-0.23694	-2.25345	0.0634303
BC030336	-0.141188	4.7792	-1.91611	0.10194
BC030499	0.458504	0.379972	1.87884	0.107433
BC030867	0.255787	4.91415	3.22046	0.0171517
BC031181	-0.0586483	5.20272	-1.04206	0.336052
BC031353	0.0107671	2.39303	0.0726435	0.944362
BC031781	-0.0163755	6.85312	-0.203093	0.845522
BC032203	-0.194623	6.21728	-2.52613	0.0434153
BC033916	0.10347	2.70127	0.841588	0.431073
BC034090	1.01221	0.106938	2.74554	0.0321638
BC037034	0.110455	4.32624	1.26108	0.25236
BC039771	-0.0558458	0.222854	-0.14094	0.892356
BC046331	0.0522681	4.63148	0.384723	0.71321
BC046404	1.25075	0.745003	2.82341	0.0289539
BC048355	-0.0810216	4.69277	-0.421761	0.687339
BC048403	0.129971	3.36504	0.775896	0.466181
BC051077	-0.268103	0.684369	-0.540963	0.607284
BC051226	0.128582	1.40447	0.482948	0.645605
BC052040	0.0512444	3.68382	0.492678	0.63909
BC053393	0.195886	1.10197	0.160088	0.877867
BC053749	0.438183	1.99199	3.30009	0.0154833
BC055111	-0.843488	0.47812	-1.66157	0.145739
BC055324	-0.11761	6.26204	-2.47962	0.0462954
BC056474	0.195037	4.8158	1.90712	0.103239
BC057022	-0.125199	2.09862	-0.867238	0.417897
BC057079	-0.32896	4.74792	-2.47422	0.0466426
BC060267	0.0615746	1.58476	0.286129	0.784039
BC064078	-2.72109	1.24588	-17.0377	1.80746e-06
BC065397	0.360693	2.29259	2.06124	0.0830907
BC067068	-0.248475	3.44844	-2.34874	0.0555228
BC067074	0.453726	4.94918	0.693668	0.512863
BC068281	-0.0370036	3.77049	-0.395095	0.705922
BC088983	0.259436	4.92544	4.08846	0.00592077
Baat1	0.34413	4.97499	3.69447	0.00945937
Bace1	-0.438278	5.53681	-5.05154	0.00207492
Bach1	0.148099	7.11381	0.674535	0.524154
Bach2	0.437589	0.952168	0.799729	0.453217
Bad	-0.0564401	3.49211	-0.417242	0.690472
Bag1	0.134674	6.21515	1.22035	0.266419
Bag2	-1.58371	1.27825	-6.94943	0.000370347
Bag3	-0.668759	3.36465	-2.12971	0.0754597
Bag4	0.171381	6.54937	2.72852	0.0329144
Bag5	0.206258	5.13298	3.47062	0.012476
Bag6	0.00835309	7.73241	0.110258	0.915664
Bahcc1	-0.217338	4.57288	-1.43543	0.199315
Bahd1	0.128399	5.09383	0.830017	0.437114
Bai1	0.49172	3.46986	2.67655	0.0353247
Baiap2	0.287502	3.9648	3.36909	0.0141803
Baiap2l1	0.0145735	-0.124696	0.0494889	0.962075
Bak1	-0.225394	4.91387	-2.79599	0.0300433
Bambi	-0.339862	3.5888	-1.15659	0.289777
Banf1	0.00648523	7.09718	0.120865	0.907595
Banp	0.508265	5.07016	5.81142	0.000990855
Bap1	0.0545515	6.65171	0.665222	0.529706
Bard1	0.0644665	5.80464	0.845099	0.429252
Basp1	-1.16649	3.8038	-3.89332	0.00744514
Bax	-0.068773	7.13111	-0.61812	0.558361
Baz1a	-0.211352	4.01133	-0.830026	0.437109
Baz1b	0.220217	8.03901	4.43563	0.00399506
Baz2a	-0.028672	7.75705	-0.425171	0.68498
Baz2b	-0.25118	6.41402	-1.84596	0.112523
Bbc3	-0.0730595	3.82853	-0.578325	0.583293
Bbip1	0.0388937	3.31675	0.394763	0.706155
Bbs1	0.205203	2.17588	1.33142	0.229608
Bbs10	-0.238372	2.80095	-2.25944	0.0629004
Bbs12	-0.262207	1.93967	-1.32823	0.230599
Bbs2	0.303971	4.2321	2.49607	0.0452545
Bbs4	-0.206918	4.16397	-1.27796	0.246727
Bbs5	-0.196816	3.07994	-2.11646	0.0768789
Bbs7	-0.655993	2.76087	-2.95557	0.024265
Bbs9	-0.406284	4.4608	-3.47989	0.012332
Bbx	-0.742176	5.04493	-3.37223	0.014124
Bcam	0.491244	6.38618	2.98456	0.0233496
Bcap29	-0.536514	3.71536	-4.00351	0.00653706
Bcap31	0.0231694	6.5182	0.395132	0.705896
Bcar1	0.0621713	4.97641	0.55713	0.596835
Bcar3	0.595599	6.03978	4.09457	0.00587896
Bcas2	-0.173478	7.29147	-3.51956	0.0117357
Bcas3	-0.379598	5.80971	-1.90558	0.103464
Bcat1	-0.466519	8.87029	-11.2489	2.24158e-05
Bcat2	0.0775132	6.66545	0.790868	0.458007
Bccip	-0.0457477	6.57473	-0.709086	0.503882
Bcdin3d	-0.0308336	2.46132	-0.22007	0.832838
Bche	-0.781753	3.14296	-2.77512	0.0309019
Bckdha	0.0216108	5.43778	0.219708	0.833108
Bckdhb	-0.327705	4.96326	-4.90582	0.00241129
Bckdk	0.167678	5.71103	2.6852	0.0349107
Bcl10	0.0184241	5.52796	0.16547	0.873804
Bcl11a	-0.708767	0.0910686	-1.34318	0.225987
Bcl11b	-0.478718	-0.0476408	-1.6276	0.152812
Bcl2l1	0.214441	5.0131	1.94053	0.0984931
Bcl2l11	0.342262	3.66281	2.56557	0.0411206
Bcl2l12	-0.0405212	4.56052	-0.352674	0.735937
Bcl2l13	0.0879303	6.0526	0.286649	0.783658
Bcl2l14	0.570956	2.53474	1.82757	0.115472
Bcl2l15	-0.328339	0.0120491	-0.520276	0.620802
Bcl2l2	-0.382576	3.8936	-2.90616	0.0259149
Bcl3	0.423765	4.85064	3.18934	0.017856
Bcl6	0.513017	2.32084	3.79845	0.00833987
Bcl6b	0.411547	2.38542	1.31537	0.234634
Bcl7a	0.144265	4.3326	1.934	0.0994022
Bcl7b	0.141916	4.37477	1.337	0.227884
Bcl7c	0.0131288	4.83394	0.0715042	0.945233
Bcl9	0.135904	2.81524	0.906874	0.398127
Bcl9l	0.801009	3.19156	3.50196	0.0119962
Bclaf1	-0.188162	8.7426	-4.52058	0.00363824
Bcor	-0.326701	5.8423	-5.87518	0.000934253
Bcorl1	0.24751	1.9948	0.89988	0.401563
Bcr	0.140908	5.0772	1.40171	0.208715
Bcs1l	0.0658705	3.88927	0.682549	0.519405
Bdh1	0.143327	5.32446	2.37076	0.0538456
Bdh2	0.118823	1.21096	0.400062	0.702443
Bdkrb2	0.694225	2.55265	5.02819	0.00212507
Bdnf	-0.147086	1.28608	-0.626011	0.553494
Bdp1	-0.0292415	6.85962	-0.549213	0.601939
Becn1	-0.0257149	6.13749	-0.545718	0.6042
Bend3	-0.518526	5.86882	-3.85938	0.00775238
Bend4	0.177502	5.378	0.875488	0.413723
Bend5	-0.0400493	0.289754	-0.217811	0.834522
Bend7	0.867539	0.815346	2.69038	0.0346656
Bet1	0.123505	4.62368	0.433849	0.678993
Bet1l	-0.02901	4.30401	-0.33631	0.747656
Bex1	-0.876206	5.87951	-2.49249	0.0454788
Bex2	-0.302491	5.09636	-2.22897	0.0656434
Bex4	-0.99183	5.70716	-2.41488	0.0506412
Bfar	-0.0765625	4.73186	-0.763879	0.472815
Bglap-rs1	0.287701	1.22483	0.243875	0.815146
Bhlhb9	-0.145466	4.33606	-0.947871	0.37843
Bhlhe40	0.714041	4.99997	8.51848	0.000115692
Bhlhe41	-1.13764	1.24147	-7.03696	0.00034519
Bhmt	0.374482	2.03986	0.342034	0.743548
Bhmt2	0.0917381	1.30641	0.0968637	0.92587
Bicc1	-0.240585	0.128762	-0.840021	0.431887
Bicd1	-0.50745	4.34095	-1.24062	0.25934
Bicd2	0.109201	5.03281	1.57112	0.165299
Bid	0.141401	6.43596	0.474913	0.65101
Bin1	-1.41771	2.16676	-11.1816	2.32349e-05
Bin2	1.05968	3.48268	5.04498	0.00208888
Bin3	-0.0814613	3.72284	-0.826729	0.438842
Birc2	0.120248	6.05418	1.58306	0.162582
Birc3	0.29755	2.84949	0.654383	0.536216
Birc5	-0.00856663	6.78462	-0.0725884	0.944404
Birc6	0.321754	8.44711	6.97676	0.000362273
Birc7	1.19424	2.39216	1.51461	0.178752
Bivm	-0.222685	4.59074	-2.47448	0.0466254
Blcap	0.0131473	4.52065	0.186827	0.857721
Blm	0.0903932	6.82279	1.73635	0.131256
Blmh	-0.235902	6.85582	-3.14624	0.0188837
Blnk	-0.636949	0.737223	-2.11698	0.0768221
Bloc1s2	-0.134831	4.38962	-1.12153	0.303341
Bloc1s3	-0.228743	3.64686	-2.08545	0.0803072
Blvra	-0.326384	2.44921	-2.8902	0.0264734
Blvrb	0.0325011	5.34182	0.327693	0.753856
Blzf1	-0.258381	5.06246	-3.33019	0.0148996
Bmf	0.106171	3.94413	0.472721	0.652489
Bmi1	-0.119706	4.99034	-1.44092	0.197823
Bmp1	-0.740738	-0.00121453	-3.56281	0.0111215
Bmp2k	0.13665	2.60461	0.422239	0.687009
Bmp7	0.397133	2.95034	1.2355	0.261112
Bmp8a	0.282728	0.0723938	0.843585	0.430036
Bmpr1a	-0.189678	6.79419	-3.30711	0.0153449
Bmpr2	-0.246659	3.27962	-2.25584	0.0632186
Bms1	0.151477	7.69834	0.573401	0.586423
Bmyc	0.451142	2.37253	3.31823	0.0151285
Bnc2	-0.550094	4.51358	-3.20763	0.0174381
Bnip1	0.180541	3.92521	1.72971	0.132483
Bnip2	0.175034	5.49793	0.444859	0.671433
Bnip3	-0.538811	2.98275	-5.09784	0.00197938
Bnip3l	-0.205258	6.24687	-2.27667	0.0614022
Bnipl	0.43213	0.499378	0.861204	0.42097
Boc	0.244285	-0.0689441	0.989351	0.359276
Bod1	-0.0239161	5.3271	-0.341104	0.744215
Bod1l	0.201299	6.69085	3.22613	0.0170266
Bok	0.0830048	3.48159	0.400681	0.70201
Bola1	0.13814	3.74171	1.17756	0.28191
Bola2	-0.24392	5.48093	-2.25135	0.0636173
Bola3	0.129152	3.78996	0.45322	0.665719
Boll	-1.1308	-0.475225	-3.54308	0.0113972
Bop1	-0.146526	6.76478	-2.05289	0.0840736
Bpgm	-0.0918785	4.00841	-0.198311	0.849103
Bphl	0.101316	2.05345	0.640221	0.544798
Bpifb5	0.945387	1.10937	2.91942	0.0254606
Bpnt1	-0.261332	6.64189	-4.28298	0.00473899
Bptf	0.139335	7.70058	2.7627	0.0314252
Braf	0.0974004	5.65288	0.354408	0.7347
Brap	0.0357079	5.06351	0.543691	0.605513
Brca1	0.0828201	7.79585	1.58847	0.161364
Brca2	0.693346	6.99748	10.9086	2.69327e-05
Brcc3	-0.142966	5.22318	-1.97802	0.093425
Brd1	-0.077317	7.58654	-0.943414	0.380534
Brd2	0.255109	8.32754	4.69841	0.00300124
Brd3	0.0465488	6.50876	0.833696	0.435187
Brd4	0.180765	6.01393	3.10741	0.0198649
Brd7	0.459737	6.32686	6.0061	0.000829161
Brd8	0.0391171	7.54408	0.699706	0.509333
Brd9	0.00112072	5.49042	0.019264	0.985232
Bre	-0.14961	4.37228	-1.9084	0.103054
Brf1	0.122625	4.71785	1.93874	0.0987414
Brf2	0.461491	4.43006	5.80396	0.000997733
Bri3	-0.0320141	4.12364	-0.253041	0.808364
Bri3bp	-0.0415928	6.51246	-0.267438	0.79775
Brip1	-0.107146	4.88181	-1.03967	0.337076
Brix1	-0.156368	6.79024	-2.60304	0.0390587
Brms1	0.138032	4.66604	2.09791	0.0789107
Brms1l	-0.0635176	4.88602	-1.109	0.308317
Brox	-0.201367	5.0327	-2.46177	0.0474531
Brp44	-0.0839284	3.3196	-0.45081	0.667364
Brp44l	0.257686	3.09201	1.583	0.162594
Brpf1	0.25122	6.37137	1.18971	0.277433
Brpf3	0.0977994	5.18254	1.08603	0.317615
Brsk1	-0.0487464	3.08059	-0.432606	0.679849
Brsk2	-0.143384	0.421165	-0.341156	0.744177
Brwd1	-0.0606466	8.16317	-0.493768	0.638362
Brwd3	-0.328422	5.67307	-5.8523	0.00095413
Bscl2	0.04263	4.9209	0.460501	0.660764
Bsdc1	0.0736024	5.68669	0.465691	0.657243
Bsg	0.0754005	8.34266	1.73418	0.131656
Bsn	-0.521109	0.884125	-1.7155	0.135148
Bspry	0.190802	4.06604	0.624818	0.554229
Bst1	0.463472	0.723589	0.442055	0.673354
Bst2	0.828193	6.02643	2.09387	0.0793613
Btaf1	-0.034004	7.42265	-0.375538	0.719692
Btbd1	-0.127459	5.15654	-0.56507	0.591741
Btbd10	0.0283329	5.26953	0.448412	0.669002
Btbd11	-1.18704	3.99397	-8.44262	0.000121857
Btbd19	-0.0378289	4.74308	-0.331075	0.751421
Btbd2	-0.00718633	6.10962	-0.0797556	0.938927
Btbd3	-0.260305	4.49972	-3.09913	0.020081
Btbd6	0.0772009	2.88534	0.548778	0.60222
Btbd7	-0.0291046	5.09916	-0.412338	0.693879
Btbd9	0.0912469	4.86523	0.741688	0.485236
Btd	-0.238918	3.02867	-1.87655	0.107781
Btf3	-0.191506	8.65644	-4.23183	0.00502195
Btf3l4	-0.10264	5.83086	-1.25145	0.255625
Btg1	-0.466979	6.46371	-7.86963	0.000182796
Btg2	0.209268	5.83123	2.39239	0.052249
Btg3	-0.830461	3.67846	-11.414	2.0543e-05
Btla	-1.80533	-0.836067	-6.55388	0.000513566
Btn2a2	0.923859	0.792342	1.74304	0.13003
Btnl7	0.136784	0.791004	0.181893	0.86143
Btrc	0.23077	5.21176	0.878919	0.411996
Bub1	-0.178584	7.49126	-2.14202	0.0741649
Bub1b	-0.135879	7.67353	-2.9976	0.0229502
Bub3	-0.0371124	6.88029	-0.775826	0.46622
Bud13	-0.101613	4.68875	-1.62605	0.153142
Bud31	-0.0419682	5.94871	-0.854922	0.424186
Bysl	0.0355112	6.14176	0.447981	0.669297
Bzrap1	-0.430326	1.27337	-0.744603	0.483591
Bzw1	-0.00144519	9.14869	-0.0253575	0.980561
Bzw2	-0.224162	7.00288	-1.23341	0.261838
C030006K11Rik	0.0430967	2.63727	0.276463	0.791119
C030013D06Rik	0.835451	-0.301272	2.5319	0.0430716
C030034I22Rik	0.36832	0.165377	0.960034	0.372733
C030039L03Rik	0.562034	1.79424	2.32346	0.0575156
C030044B11Rik	0.271247	1.76369	1.56228	0.167339
C030046E11Rik	-0.268651	5.93182	-3.54251	0.0114053
C030046I01Rik	0.0800477	4.70039	1.24099	0.259211
C030048B08Rik	0.0217667	4.46481	0.300037	0.773891
C130022K22Rik	0.38793	4.99477	1.17012	0.284678
C130036L24Rik	0.542919	0.454938	2.40252	0.0515184
C130039O16Rik	0.597758	5.79428	8.00441	0.0001658
C130073F10Rik	1.42575	0.673667	1.12935	0.300272
C130074G19Rik	0.495396	5.24583	1.37389	0.216769
C1d	-0.28603	5.10877	-2.69542	0.0344285
C1galt1	-0.200136	5.51369	-0.766174	0.471543
C1galt1c1	-0.30471	3.29694	-2.6921	0.0345847
C1qbp	-0.0702608	7.43704	-1.34666	0.224925
C1ql1	0.489569	0.0728442	1.54151	0.172225
C1ql3	-1.56416	-0.563133	-2.89085	0.0264502
C1qtnf1	-0.484776	-0.382214	-0.985844	0.360866
C1qtnf6	-0.279133	1.09653	-0.66372	0.530606
C1rl	0.0644933	2.26093	0.502633	0.63246
C1s	0.182615	3.84894	1.3182	0.233742
C2	0.977227	0.477238	1.59576	0.159737
C230035I16Rik	0.320361	0.337775	1.68687	0.140674
C230052I12Rik	-0.109966	3.60988	-0.736115	0.488389
C230081A13Rik	-0.152941	4.13711	-1.09821	0.312657
C230096C10Rik	0.04386	7.2584	0.437204	0.676684
C2cd2	0.245343	3.19915	1.28209	0.245367
C2cd2l	0.336655	3.56482	1.34597	0.225137
C2cd3	-0.0686516	5.12599	-1.02022	0.345524
C2cd4c	0.824252	-0.256219	1.39215	0.211452
C330002G04Rik	0.139337	0.473697	0.372263	0.722009
C330005M16Rik	0.795182	1.27052	1.68935	0.140187
C330006A16Rik	0.0446769	4.88441	0.228829	0.826315
C330006D17Rik	0.147911	0.419529	0.5718	0.587442
C330006K01Rik	0.16935	4.76173	2.17586	0.0707207
C330007P06Rik	-0.0220901	5.12679	-0.370418	0.723316
C330008G21Rik	-4.41069	0.503096	-9.32242	6.83143e-05
C330011M18Rik	0.976691	-0.0107032	4.14947	0.00551802
C330013F16Rik	0.0277988	2.04366	0.157837	0.879568
[truncated: 11,791 more rows]

## Sheet: Up in Dnttip1 KO vs WT
Gene	log2FC	AveExpr	T.Value	P.Value	Reactome
Cd180	2.58892	-0.117812	8.99386	8.43042e-05	Immune_System,Innate_Immune_System
Nod2	2.20409	2.37756	8.17279	0.000147054	Immune_System,Innate_Immune_System,Signaling_by_Interleukins
Adh7	2.12552	-0.622763	5.69382	0.00110579	NA
2410004A20Rik	2.10586	5.95039	12.417	1.23819e-05	NA
Casq2	2.06582	0.784956	8.84097	9.31869e-05	NA
Dnahc17	1.92164	1.95211	7.27421	0.000286269	NA
Igfbp7	1.84777	1.01698	6.94622	0.000371307	NA
Inf2	1.80608	2.92798	5.12122	0.00193303	NA
Dnmt3l	1.76831	5.38868	4.04521	0.00622608	NA
Gm757	1.71539	0.199244	4.65029	0.00316028	NA
Car5a	1.68902	1.11798	6.7867	0.000422891	NA
Gm1082	1.67208	-0.521846	3.84448	0.00789168	NA
Gm216	1.65494	0.663276	4.94753	0.00230911	NA
Itpkb	1.64503	3.38918	4.61095	0.00329735	NA
St8sia1	1.64102	3.02357	4.62287	0.00325514	NA
Gm694	1.64023	2.30408	3.83788	0.00795434	NA
Gm13844	1.63176	-0.266441	4.18221	0.00531461	NA
Icosl	1.62371	1.63001	7.14084	0.000317834	NA
Slc41a3	1.61444	2.43038	10.1586	4.11449e-05	NA
Dkkl1	1.612	1.8224	3.74929	0.00884981	NA
Gm13029	1.58979	-0.0552466	4.52583	0.00361739	NA
Anxa2	1.57214	2.22652	10.3194	3.74852e-05	NA
Gm13068	1.53602	2.48639	4.87881	0.00248016	NA
Tmem179	1.51083	0.388073	5.86955	0.000939101	NA
2310015A10Rik	1.48922	2.03031	6.31566	0.00063005	NA
Myh7b	1.46145	3.84652	6.14637	0.000731197	NA
Crabp2	1.44949	1.1589	5.50253	0.00132658	NA
Fam19a4	1.44113	2.54601	12.441	1.22387e-05	NA
Scnn1a	1.43135	1.31164	7.02259	0.000349184	NA
Irak2	1.42943	4.43814	8.01362	0.000164706	Immune_System,Innate_Immune_System,Signaling_by_Interleukins
Id1	1.4101	0.236099	6.35463	0.00060908	NA
Adssl1	1.40366	2.30035	10.0087	4.49345e-05	NA
Crb2	1.38727	2.39582	5.30984	0.00160085	NA
Zbtb16	1.38235	0.643829	4.22595	0.00505566	Antigen_processing:_Ubiquitination_&_Proteasome_degradation,Class_I_MHC_mediated_antigen_processing_&_presenta,Immune_System
Akr1b8	1.373	1.98919	5.09959	0.00197586	NA
Rnf213	1.36268	7.1149	5.68531	0.00111468	Antigen_processing:_Ubiquitination_&_Proteasome_degradation,Class_I_MHC_mediated_antigen_processing_&_presenta,Immune_System
Gm15351	1.35691	1.18395	5.58754	0.00122282	NA
E330020D12Rik	1.33817	5.31852	9.50998	6.07626e-05	NA
Il12rb1	1.33266	-0.189484	4.41783	0.00407467	Immune_System,Signaling_by_Interleukins
Nes	1.32127	5.62251	5.48423	0.0013502	NA
9130017N09Rik	1.32126	3.18884	6.68921	0.00045843	NA
Fgg	1.31645	0.0380935	4.48072	0.00380101	Developmental_Biology,Extracellular_matrix_organization,Immune_System,Innate_Immune_System,Signaling_by_FGFR3,Signaling_by_FGFR4,Signaling_by_Interleukins,Signalling_by_NGF
Cpe	1.31216	6.20977	6.26186	0.000660359	NA
Pvrl1	1.30594	3.86269	8.67664	0.000103956	NA
Atp12a	1.29543	1.09095	6.82363	0.000410258	NA
Eps8	1.27858	5.48561	11.8786	1.61693e-05	NA
Slco4a1	1.27717	2.81906	10.433	3.51244e-05	NA
Gpnmb	1.26864	5.78413	4.96743	0.00226209	NA
Vill	1.26107	1.66093	7.55406	0.00023101	NA
Gc	1.2509	1.65038	8.75262	9.88083e-05	NA
Fam13c	1.23679	2.19904	5.81116	0.000991093	NA
Ecscr	1.23485	0.12555	5.41434	0.0014449	NA
Slc44a3	1.23374	0.359132	4.24386	0.00495373	NA
Slc6a7	1.23103	4.00668	6.15849	0.000723369	NA
Lrrk1	1.22577	-0.22678	5.35577	0.00153008	NA
Spsb4	1.22197	1.18595	3.91966	0.00721599	Antigen_processing:_Ubiquitination_&_Proteasome_degradation,Class_I_MHC_mediated_antigen_processing_&_presenta,Immune_System
Oplah	1.20944	4.15091	5.78866	0.001012	NA
Ggt1	1.19929	2.82701	4.0398	0.00626545	NA
Fgf10	1.19819	3.68425	4.0414	0.00625374	Developmental_Biology,Immune_System,Innate_Immune_System,Signaling_by_FGFR3,Signaling_by_FGFR4,Signaling_by_Interleukins,Signalling_by_NGF
Rab19	1.19686	0.0344504	4.00373	0.00653539	NA
AA986860	1.17673	2.73298	5.53764	0.00128256	NA
Palm3	1.17556	4.90853	16.3131	2.35841e-06	NA
Il34	1.17302	2.30017	4.21756	0.00510425	Immune_System,Signaling_by_Interleukins
Mdk	1.17237	4.98614	11.9056	1.59498e-05	NA
Espn	1.16896	1.38858	3.75359	0.00880387	NA
Rgs3	1.16419	4.2544	4.36801	0.00430715	NA
Ahnak	1.16143	8.84088	5.53288	0.00128842	NA
Pacsin1	1.15416	0.283706	4.23737	0.00499041	LEIN_NEURON_MARKERS
Macrod1	1.15339	0.705909	3.79756	0.00834878	NA
1700066B19Rik	1.14984	0.652432	5.88554	0.000925407	NA
Fgl2	1.14793	0.290331	4.00371	0.00653554	NA
Eps8l2	1.14237	5.0435	4.43925	0.00397906	NA
Elmo3	1.14075	3.97786	11.8933	1.60494e-05	NA
Nfatc2	1.13903	-0.386248	4.6777	0.00306856	Immune_System,Innate_Immune_System
Pdpn	1.13051	5.15893	11.9966	1.52361e-05	NA
Nav1	1.12882	4.96031	8.26011	0.000138297	NA
Pde1b	1.1273	4.5963	3.78053	0.00852189	Immune_System,Innate_Immune_System,Signaling_by_FGFR3,Signaling_by_FGFR4,Signalling_by_NGF
Fam129c	1.11652	1.42274	4.17337	0.00536865	NA
Inpp5d	1.10474	5.69127	4.09104	0.00590309	Immune_System,Signaling_by_Interleukins
1700086P04Rik	1.10243	-0.312422	5.03603	0.00210807	NA
Srrm4	1.10168	0.639048	3.75393	0.00880016	NA
Kndc1	1.09648	2.67305	4.47775	0.00381347	NA
1700012A16Rik	1.09485	0.730508	4.25773	0.00487638	NA
Zc3h6	1.09418	0.989427	5.81697	0.00098578	NA
Lrp1	1.08494	5.39398	8.8306	9.38274e-05	NA
Chd5	1.08473	2.24875	6.53527	0.000521725	NA
Zbp1	1.08446	1.29782	5.88203	0.000928389	Immune_System,Innate_Immune_System
Pde4c	1.08398	0.933715	4.1114	0.00576563	NA
Sema4a	1.07755	1.68619	4.877	0.00248485	Developmental_Biology
Magi2	1.07366	1.09692	4.95094	0.00230098	NA
Tcl1	1.07087	6.18127	8.81339	9.49014e-05	NA
Cyp1a1	1.06032	5.60524	11.5747	1.88906e-05	NA
Arhgap8	1.0603	4.14004	7.2478	0.000292223	NA
Bin2	1.05968	3.48268	5.04498	0.00208888	NA
Nckap1l	1.05882	4.23889	4.06991	0.00604963	Immune_System,Innate_Immune_System
Atp2a3	1.0582	5.55	3.96006	0.00687961	NA
Unc13d	1.0526	3.82822	5.3755	0.00150077	NA
Selplg	1.0485	-0.0498865	4.11026	0.00577322	NA
Dusp3	1.0439	2.33192	7.24509	0.000292843	Immune_System,Innate_Immune_System,Signalling_by_NGF
1600029D21Rik	1.03855	4.44199	4.86075	0.00252746	NA
Nkain4	1.03235	2.06678	4.99996	0.00218754	NA
Phyhip	1.02408	0.6853	4.37426	0.00427718	NA
Hydin	1.01977	1.93587	4.75571	0.00282346	NA
Usp43	1.01732	3.70073	5.70645	0.00109275	NA
Arhgef16	1.01637	4.14107	9.06177	8.06741e-05	Signalling_by_NGF
Tspo2	1.01188	3.56775	4.68485	0.00304514	NA
Sema3b	1.01181	4.28829	3.84484	0.0078883	NA
U5	1.0091	2.50329	6.44381	0.00056403	NA
Prkar1b	1.00585	0.851099	4.03916	0.00627015	LEIN_NEURON_MARKERS,Immune_System,Innate_Immune_System,Signaling_by_FGFR3,Signaling_by_FGFR4,Signalling_by_NGF
Sema6b	1.00151	2.12356	6.9607	0.000366992	NA
Crip1	0.99782	4.96111	11.4623	2.00294e-05	NA
Acoxl	0.988453	0.995708	5.81284	0.000989555	NA
C330011M18Rik	0.976691	-0.0107032	4.14947	0.00551802	NA
Gm17580	0.975228	-0.352939	4.27125	0.00480227	NA
Tgm1	0.972295	5.3322	10.4979	3.38516e-05	NA
Plec	0.972223	7.64365	11.4773	1.98729e-05	Extracellular_matrix_organization
Arvcf	0.962963	6.00977	11.228	2.26666e-05	NA
F3	0.961378	1.43237	6.10805	0.000756583	NA
Nos1	0.959143	2.88836	3.78658	0.00845996	Immune_System
Lpl	0.950732	4.45262	4.64318	0.00318458	Developmental_Biology
Capg	0.949492	3.90199	7.50549	0.000239657	NA
Nlrx1	0.949306	2.73155	8.98152	8.49841e-05	Immune_System,Innate_Immune_System
Apobec2	0.949101	3.43763	4.75713	0.0028192	NA
Nt5e	0.94094	2.96139	5.63551	0.00116834	NA
Slc12a4	0.93283	4.96431	5.43677	0.00141371	NA
Gm10060	0.932484	3.77138	3.93894	0.00705325	NA
Epha4	0.93101	7.48866	7.96669	0.000170367	Developmental_Biology
Rarg	0.929983	3.19782	6.55525	0.000512971	Developmental_Biology
Fads6	0.923886	4.9952	6.68469	0.000460161	NA
Lamb3	0.92104	0.964295	4.14856	0.0055238	Extracellular_matrix_organization
AA386476	0.920649	1.35701	5.38119	0.00149243	NA
Spsb1	0.919121	2.2295	6.31009	0.000633112	Antigen_processing:_Ubiquitination_&_Proteasome_degradation,Class_I_MHC_mediated_antigen_processing_&_presenta,Immune_System
Aim1l	0.916338	3.86804	6.33333	0.000620441	NA
Jakmip1	0.914844	5.61314	5.10229	0.00197047	LEIN_NEURON_MARKERS
Nkx6-2	0.914509	4.98429	7.00274	0.000354787	NA
Amotl2	0.913664	6.47173	4.0378	0.0062801	NA
Tmc4	0.910175	3.31375	8.35309	0.000129624	NA
B4galnt3	0.908053	6.61098	6.08378	0.000773186	NA
Dnahc2	0.907328	1.76535	3.91522	0.00725408	NA
Map2k6	0.906901	5.28673	13.061	9.12394e-06	Developmental_Biology,Immune_System,Innate_Immune_System,Signaling_by_Interleukins
2210011C24Rik	0.906765	1.46989	5.56532	0.00124902	NA
Sema6c	0.905929	4.71619	4.82655	0.00261981	NA
Ptpn13	0.905811	4.292	6.35574	0.000608499	NA
Itpr3	0.902574	6.2301	6.07017	0.000782675	Immune_System,Innate_Immune_System,Signaling_by_FGFR3,Signaling_by_FGFR4,Signalling_by_NGF
Csrnp1	0.901273	3.44015	6.77889	0.000425618	NA
Tspan17	0.895633	1.75867	6.07099	0.000782099	NA
Aldh1l1	0.89305	5.8572	12.8738	9.95613e-06	NA
Serpinh1	0.892296	5.84972	10.4532	3.47231e-05	Extracellular_matrix_organization
Lmna	0.889646	5.58196	4.17742	0.00534379	NA
Zfhx3	0.888269	4.48828	9.24795	7.16083e-05	NA
Ube2l6	0.883764	4.21862	5.37603	0.00149998	Antigen_processing:_Ubiquitination_&_Proteasome_degradation,Class_I_MHC_mediated_antigen_processing_&_presenta,Immune_System,Innate_Immune_System
AI661453	0.880458	1.59694	4.73863	0.00287519	NA
Trim63	0.878831	1.05042	3.80482	0.00827624	Antigen_processing:_Ubiquitination_&_Proteasome_degradation,Class_I_MHC_mediated_antigen_processing_&_presenta,Immune_System
Gm15651	0.877792	-0.0458291	3.84154	0.00791952	NA
Oas2	0.876751	0.841319	3.95393	0.00692951	Immune_System
Smagp	0.873613	4.23113	10.7311	2.97019e-05	NA
Gpr133	0.872241	0.150775	3.80383	0.00828602	NA
Tes	0.870582	6.66969	10.7263	2.97802e-05	NA
Parp3	0.867885	3.6388	4.00693	0.00651089	NA
Lamb2	0.864733	6.29818	11.1528	2.35963e-05	Extracellular_matrix_organization
Mlycd	0.862668	2.51027	7.52142	0.000236781	NA
Rhou	0.861607	4.61327	3.94164	0.00703079	NA
Pld2	0.857799	2.6938	4.59262	0.00336349	Immune_System,Innate_Immune_System
Slc29a3	0.855455	3.84465	9.98802	4.54873e-05	NA
Has3	0.854923	3.46766	3.88914	0.00748228	NA
Gm12599	0.853319	-0.209671	3.91474	0.00725822	NA
Grtp1	0.851279	5.72992	15.075	3.81897e-06	NA
Hist1h4i	0.849753	6.32639	5.69617	0.00110335	NA
Plod1	0.849738	6.04062	5.69569	0.00110384	Extracellular_matrix_organization
Anxa5	0.844795	4.10286	6.24882	0.00066795	NA
Satb2	0.844407	1.88064	4.77723	0.00275976	NA
Dysf	0.844393	1.61141	5.44205	0.00140649	NA
Osbpl5	0.842661	1.24549	4.04852	0.00620205	NA
Ppp1r14a	0.840548	1.48451	3.9958	0.00659645	NA
Agpat3	0.83916	4.48229	7.58158	0.000226269	NA
Fgd2	0.830688	1.90483	5.87902	0.000930964	Signalling_by_NGF
Ppfia4	0.830636	4.59926	4.30555	0.00461985	NA
Rasgef1a	0.824814	3.92201	7.32856	0.000274446	Developmental_Biology,Immune_System,Innate_Immune_System,Signaling_by_FGFR3,Signaling_by_FGFR4,Signaling_by_Interleukins,Signalling_by_NGF
Gal3st3	0.821948	1.94799	5.27868	0.00165098	NA
Haus8	0.821658	6.32802	8.48793	0.00011813	NA
Cacnb3	0.82116	4.45847	10.1973	4.0229e-05	Developmental_Biology
Glis2	0.819698	4.89134	8.04788	0.000160711	NA
Hmcn2	0.818474	2.23168	4.70557	0.00297835	NA
Notch1	0.817027	5.65847	4.24968	0.00492113	Developmental_Biology
Col4a1	0.813254	3.70657	4.59001	0.00337305	Developmental_Biology,Extracellular_matrix_organization
Cyba	0.81156	5.17727	6.40598	0.000582658	Class_I_MHC_mediated_antigen_processing_&_presenta,Immune_System
9330133O14Rik	0.80974	1.85295	4.35953	0.00434819	NA
Sh3tc1	0.80764	5.39269	7.92554	0.000175514	NA
Kank1	0.807487	5.54308	8.56762	0.00011189	NA
4833407H14Rik	0.806952	1.09358	4.08698	0.00593094	NA
Etv1	0.802762	2.51567	6.31212	0.000631995	NA
Pmel	0.800706	6.31942	11.4028	2.06635e-05	NA
Ablim1	0.795637	6.7307	4.07515	0.00601289	Developmental_Biology
Csnk1e	0.795276	5.55948	3.84451	0.00789145	NA
Abca7	0.794898	5.84141	11.13	2.38857e-05	NA
Shc2	0.789786	3.02731	5.12025	0.00193493	Developmental_Biology,Immune_System,Innate_Immune_System,Signaling_by_FGFR3,Signaling_by_FGFR4,Signaling_by_Interleukins,Signalling_by_NGF
Gm13340	0.789088	6.40615	3.94315	0.00701826	NA
Lpar1	0.786182	5.39379	3.81006	0.00822421	NA
Rab11fip5	0.785086	7.049	14.7781	4.31088e-06	NA
Rab4a	0.782746	5.3449	10.7657	2.91367e-05	NA
mmu-mir-2134-4	0.780425	5.83659	3.89854	0.00739911	NA
Ier5l	0.777773	3.07429	4.43552	0.00399553	NA
Casz1	0.775061	2.80711	4.45136	0.00392614	NA
Fbxo2	0.774301	0.536683	3.8996	0.00738978	Antigen_processing:_Ubiquitination_&_Proteasome_degradation,Class_I_MHC_mediated_antigen_processing_&_presenta,Immune_System
Hhex	0.773828	1.78079	5.38392	0.00148845	Developmental_Biology
Map1lc3b	0.769483	7.69822	5.60208	0.00120601	NA
Anxa4	0.768441	4.28581	3.85005	0.00783935	NA
Nfic	0.764067	3.42494	4.23409	0.00500907	NA
Kcnn1	0.763641	4.4391	4.36451	0.00432406	NA
H2afy2	0.760621	4.2696	4.46817	0.00385394	NA
Dqx1	0.754954	2.04444	4.6779	0.00306788	NA
Tnfrsf1b	0.75413	3.58827	5.31563	0.00159173	Immune_System
Unc5b	0.752094	6.1199	13.6085	7.11504e-06	Developmental_Biology
Fry	0.751946	5.46636	5.35121	0.00153694	NA
1700023L04Rik	0.750572	1.03872	4.06557	0.00608018	NA
Rab25	0.750124	2.43329	6.38616	0.000592699	NA
Mtus1	0.747337	5.99947	7.35728	0.000268425	NA
Gm1070	0.747065	1.76643	3.71564	0.00921863	NA
Ggta1	0.742396	5.60566	11.4745	1.99017e-05	NA
Catsperg1	0.740876	2.44005	5.72626	0.00107264	NA
Fbxl8	0.740015	0.919739	3.95569	0.00691511	Antigen_processing:_Ubiquitination_&_Proteasome_degradation,Class_I_MHC_mediated_antigen_processing_&_presenta,Immune_System
Hpgd	0.739111	1.38316	3.774	0.00858933	NA
Ddhd2	0.737905	6.0943	5.73518	0.00106372	NA
Gdf11	0.737081	1.59252	4.41414	0.00409141	NA
Gpx2	0.734706	6.71635	8.74445	9.93475e-05	NA
Rasgrp4	0.734107	3.6849	5.4925	0.00133947	Developmental_Biology,Immune_System,Innate_Immune_System,Signaling_by_FGFR3,Signaling_by_FGFR4,Signaling_by_Interleukins,Signalling_by_NGF
Tspan15	0.733866	4.28983	4.16296	0.00543316	NA
Nr3c2	0.732594	0.932597	3.7172	0.00920118	NA
Palm	0.726046	4.7857	10.4067	3.56542e-05	NA
Ttll3	0.725449	1.58599	3.95752	0.00690023	NA
Lrrc29	0.724947	1.32419	3.79795	0.0083449	NA
Myh14	0.723788	3.3736	5.44796	0.00139844	Developmental_Biology
Abcg1	0.72258	5.73187	8.94742	8.68954e-05	NA
Wwc1	0.721782	5.14934	10.7187	2.99064e-05	NA
Mast3	0.720308	4.84843	4.38384	0.00423173	NA
Mocos	0.719757	3.47467	4.39274	0.00418995	NA
2810408A11Rik	0.719065	3.06244	5.82942	0.000974488	NA
Irs2	0.717981	3.58575	4.72194	0.00292674	Developmental_Biology,Immune_System,Innate_Immune_System,Signaling_by_FGFR3,Signaling_by_FGFR4,Signaling_by_Interleukins,Signalling_by_NGF
1300018I17Rik	0.717725	3.71381	5.33383	0.00156343	NA
Plekhg5	0.717644	5.76573	7.34649	0.00027067	Signalling_by_NGF
Bhlhe40	0.714041	4.99997	8.51848	0.000115692	NA
Fbxo31	0.713561	5.35782	6.0974	0.000763821	Antigen_processing:_Ubiquitination_&_Proteasome_degradation,Class_I_MHC_mediated_antigen_processing_&_presenta,Immune_System
Lrp2	0.711929	2.86784	5.5945	0.00121474	NA
Iqsec1	0.708436	3.96331	6.32101	0.000627121	NA
Pfkfb2	0.707195	5.84554	6.09174	0.000767692	NA
Sdc4	0.706962	8.12248	4.91099	0.00239835	Extracellular_matrix_organization
Ablim2	0.70621	3.74926	4.17559	0.00535506	Developmental_Biology
Marveld3	0.705618	1.78458	4.07665	0.00600243	NA
Lama1	0.703257	7.80262	8.83206	9.37365e-05	Developmental_Biology,Extracellular_matrix_organization
Fzd10	0.702766	5.85718	4.72825	0.00290713	NA
Ccdc130	0.702554	3.79995	6.12351	0.000746224	NA
Slfn9	0.702108	2.62309	5.33513	0.00156144	NA
Hook2	0.701853	6.50715	8.40345	0.000125187	NA
Cacna1a	0.70082	5.38012	4.16993	0.00538987	NA
Gipc2	0.697126	1.85038	4.97184	0.00225181	NA
Chdh	0.695988	0.679009	3.87743	0.00758726	NA
Hdhd1a	0.694664	1.59462	3.80209	0.00830338	NA
Bdkrb2	0.694225	2.55265	5.02819	0.00212507	NA
Tmem18	0.693542	5.46085	10.2025	4.01069e-05	NA
Itgb7	0.693538	4.0532	5.11092	0.00195329	Extracellular_matrix_organization,Immune_System
Brca2	0.693346	6.99748	10.9086	2.69327e-05	NA
Parvb	0.691606	4.26084	6.42205	0.000574659	NA
Cc2d1a	0.689443	5.30853	7.99671	0.000166721	NA
Nup210	0.689415	8.25467	3.66055	0.0098597	Immune_System
Sh3rf1	0.688474	4.59591	4.06315	0.00609734	Antigen_processing:_Ubiquitination_&_Proteasome_degradation,Class_I_MHC_mediated_antigen_processing_&_presenta,Immune_System
Gdap10	0.685491	3.96102	6.33737	0.000618271	NA
1600016N20Rik	0.684608	2.36172	5.12794	0.00191994	NA
Rab3d	0.683773	1.77398	4.83965	0.00258398	NA
Tbc1d2	0.682652	3.96581	5.64047	0.00116286	NA
Ildr1	0.682451	6.42603	6.69984	0.000454394	NA
Agpat2	0.680325	4.88218	4.6976	0.00300383	NA
Isyna1	0.67964	6.67964	7.78736	0.000194151	NA
Adprh	0.679489	6.39384	8.86529	9.17044e-05	NA
Susd2	0.677283	6.52726	6.53952	0.00051985	NA
Tspan9	0.677235	3.98996	7.38152	0.000263461	NA
Atp6v0a4	0.673377	3.08179	6.64043	0.000477487	Immune_System
Hsd17b11	0.672114	2.92752	5.6819	0.00111827	NA
Ubr4	0.671481	8.13708	6.40602	0.000582638	Antigen_processing:_Ubiquitination_&_Proteasome_degradation,Class_I_MHC_mediated_antigen_processing_&_presenta,Immune_System
Spnb4	0.669001	3.55675	4.85806	0.0025346	NA
Junb	0.668866	3.75242	4.87771	0.00248302	NA
Nek3	0.667441	3.88646	4.61873	0.00326973	NA
Ptpn3	0.666957	5.08638	3.74401	0.0089066	NA
Abr	0.666316	6.33819	6.58624	0.000499724	Signalling_by_NGF
Herpud1	0.66605	5.0057	6.80665	0.000416012	NA
Il23a	0.666016	1.41276	4.47155	0.00383961	Immune_System,Signaling_by_Interleukins
Snx21	0.665013	2.5474	4.17109	0.00538272	NA
Gm7866	0.663128	4.4895	4.13847	0.00558836	Antigen_processing:_Ubiquitination_&_Proteasome_degradation,Class_I_MHC_mediated_antigen_processing_&_presenta,Developmental_Biology,Immune_System,Innate_Immune_System,Signaling_by_FGFR3,Signaling_by_FGFR4,Signaling_by_Interleukins,Signalling_by_NGF
Evi5l	0.662854	2.89994	5.17059	0.00183912	NA
Ccnjl	0.662278	2.15765	4.37186	0.00428868	NA
Prss16	0.662175	1.6618	3.99171	0.0066282	NA
Sipa1l2	0.661095	7.26762	4.89729	0.00243281	NA
Vamp8	0.660914	3.98381	7.63516	0.000217356	NA
Dusp1	0.660732	5.62798	5.41194	0.00144829	Developmental_Biology,Immune_System,Innate_Immune_System,Signaling_by_FGFR3,Signaling_by_FGFR4,Signaling_by_Interleukins,Signalling_by_NGF
Grhl3	0.659234	4.16962	4.37244	0.00428591	NA
Lamc2	0.655808	6.84909	14.1846	5.53192e-06	Extracellular_matrix_organization
Cdh3	0.65538	5.45594	5.99697	0.000836034	NA
Peli3	0.654462	2.04609	5.17137	0.00183769	Immune_System,Innate_Immune_System,Signaling_by_Interleukins
Prss8	0.654287	4.8078	7.64595	0.000215609	NA
Podxl	0.654253	4.80766	8.87713	9.09928e-05	NA
Epcam	0.65405	6.60156	5.33358	0.00156381	NA
Sparc	0.653503	8.85562	8.28668	0.000135752	Extracellular_matrix_organization
Whsc1l1	0.652541	5.03273	10.4162	3.54611e-05	NA
Slc30a2	0.65136	4.40224	4.60262	0.00332723	NA
Spry2	0.651119	6.07557	4.14978	0.00551608	Signaling_by_FGFR3,Signaling_by_FGFR4
Nupr1	0.649566	5.15544	6.90105	0.000385146	NA
4933407C03Rik	0.647974	4.64524	4.39559	0.00417666	NA
Glt25d1	0.647532	8.23603	8.41488	0.000124205	Extracellular_matrix_organization
Rnf19b	0.646613	6.19852	5.93936	0.000880948	Antigen_processing:_Ubiquitination_&_Proteasome_degradation,Class_I_MHC_mediated_antigen_processing_&_presenta,Immune_System
Hsdl1	0.646223	5.6533	5.65408	0.001148	NA
Mtap1a	0.645573	3.4605	4.11224	0.00576004	NA
Wwox	0.64273	3.60912	6.02376	0.000816038	NA
Tmem184b	0.642618	4.078	5.82478	0.00097868	NA
Sbno2	0.642064	5.85633	7.99317	0.000167147	NA
Slc2a4	0.642048	1.80403	3.71939	0.00917675	Developmental_Biology
mt-Nd4	0.637738	7.05182	6.84132	0.000404358	NA
Dusp5	0.636382	2.10016	4.39637	0.00417305	Developmental_Biology,Immune_System,Innate_Immune_System,Signaling_by_FGFR3,Signaling_by_FGFR4,Signaling_by_Interleukins,Signalling_by_NGF
Arrdc2	0.635075	4.62647	10.0533	4.37653e-05	NA
Cdh1	0.633158	9.26589	14.3306	5.19794e-06	Extracellular_matrix_organization,Immune_System
Fbxo44	0.630733	2.77758	4.19593	0.0052318	Antigen_processing:_Ubiquitination_&_Proteasome_degradation,Class_I_MHC_mediated_antigen_processing_&_presenta,Immune_System
Gse1	0.630719	5.29599	5.30088	0.00161509	NA
Slc22a18	0.625105	2.59432	5.04577	0.00208719	NA
Slc38a7	0.625085	5.55868	4.80022	0.00269351	NA
Chst15	0.623992	2.3276	5.64508	0.00115781	NA
Nrarp	0.62315	2.40869	4.2538	0.0048982	NA
Fat1	0.622817	8.7182	10.8477	2.78474e-05	NA
Sugp2	0.62268	6.59574	9.26361	7.09008e-05	NA
Nr4a1	0.62187	4.87012	4.94444	0.00231652	Immune_System,Innate_Immune_System,Signaling_by_FGFR3,Signaling_by_FGFR4,Signalling_by_NGF
Mri1	0.621251	5.38623	8.33284	0.000131457	NA
Rbl2	0.621088	3.52475	7.60393	0.000222501	NA
Myo9b	0.620228	7.21359	11.0647	2.4741e-05	Immune_System,Innate_Immune_System
Cnot1	0.618915	9.64008	13.4005	7.81143e-06	NA
2610005L07Rik	0.618865	7.36477	3.81286	0.00819666	NA
Tk2	0.617471	4.67561	8.03275	0.000162461	NA
Arhgef18	0.617389	7.53126	5.56103	0.00125415	Signalling_by_NGF
Syne2	0.616797	7.81287	11.0969	2.43161e-05	NA
Cyld	0.616443	4.93458	8.1879	0.000145494	Immune_System,Innate_Immune_System
Ppp1r1a	0.613372	4.07148	4.63686	0.00320636	NA
Prx	0.612148	4.71789	4.60886	0.00330483	NA
Ebf1	0.610943	4.85792	6.51882	0.00052906	Developmental_Biology
Cdk10	0.610657	5.45844	8.83315	9.36694e-05	NA
Wfdc2	0.608616	7.47998	12.5219	1.17698e-05	NA
Rassf1	0.608279	4.5226	6.65788	0.00047057	NA
Cherp	0.6052	5.84149	9.80381	5.07805e-05	NA
Gm10033	0.605059	2.8006	4.04692	0.00621365	NA
Myst3	0.602922	6.4771	11.5155	1.94809e-05	NA
Def8	0.602715	6.95569	10.0889	4.28584e-05	NA
Syde2	0.602146	6.18429	5.84186	0.000963358	NA
Zbtb32	0.601387	2.93207	5.94338	0.000877729	NA
Gm17561	0.601245	2.22477	4.56697	0.00345856	NA
Gpt2	0.598286	6.97317	5.48582	0.00134813	NA
Fam125a	0.598083	5.28676	6.28752	0.000645701	NA
C130039O16Rik	0.597758	5.79428	8.00441	0.0001658	NA
Zfp819	0.596456	5.1784	4.73825	0.00287633	NA
Bcar3	0.595599	6.03978	4.09457	0.00587896	NA
Lrfn1	0.593435	2.40175	3.93765	0.00706397	NA
Mmgt2	0.593002	1.47359	3.74158	0.00893282	NA
Nagk	0.591437	4.1567	6.85222	0.000400771	NA
Ssbp4	0.590937	5.53215	5.25271	0.00169412	NA
A4galt	0.590439	6.56162	5.40224	0.00146204	NA
Cltb	0.588127	5.7854	4.0371	0.00628526	Developmental_Biology
Tada3	0.586939	5.95632	4.3765	0.0042665	NA
Tmod2	0.584831	3.48331	5.14746	0.00188246	NA
Tjp3	0.58464	5.61346	3.72267	0.00914021	NA
Tom1	0.584126	4.66493	8.12559	0.000152051	NA
Cog2	0.581797	5.73541	11.1609	2.34935e-05	NA
Arhgef10	0.581398	2.52097	3.7658	0.00867477	NA
Cmtm4	0.580875	4.20093	5.83199	0.000972176	NA
Padi2	0.580813	4.72161	7.61278	0.00022103	NA

## Sheet: Down in Dnttip1 KO vs WT
Gene	log2FC	AveExpr	T.Value	P.Value	Reactome
AY036118	-8.56169	6.96468	-6.14163	0.000734286	NA
Peg10	-6.97863	1.74163	-5.69936	0.00110005	NA
Meg3	-5.15107	-1.36568	-16.1299	2.52701e-06	NA
Rian	-4.73371	0.4937	-15.1041	3.77421e-06	NA
Nxf3	-4.72441	1.47986	-18.0978	1.2482e-06	NA
C330008G21Rik	-4.41069	0.503096	-9.32242	6.83143e-05	NA
En1	-4.24524	-1.72945	-14.0213	5.93507e-06	NA
Nnat	-4.07876	-1.15523	-7.16781	0.000311142	NA
Rgs6	-3.86631	-1.62294	-7.7438	0.000200489	NA
Slit3	-3.78917	-0.762156	-8.53647	0.000114283	Axon_guidance
Gm10801	-3.65758	-1.55902	-8.46555	0.000119955	NA
Gm9	-3.64929	-2.27467	-8.5156	0.00011592	NA
Sgce	-3.58995	-0.107805	-7.97743	0.000169052	NA
Mmp16	-3.58441	0.705095	-16.0659	2.58922e-06	NA
1700048O20Rik	-3.57995	-1.96112	-5.56545	0.00124886	NA
Gria4	-3.35541	-1.11824	-12.3953	1.25135e-05	LEIN_NEURON_MARKERS,Glutamate_Binding_Activation_of_AMPA_Receptors,Neuronal_System,Neurotransmitter_Receptor_Binding_And_Downstream,Trafficking_of_AMPA_receptors,Transmission_across_Chemical_Synapses
H19	-3.22938	-1.63216	-5.62624	0.00117865	NA
Dner	-3.18933	2.21897	-11.8617	1.63079e-05	NA
Rhox2a	-3.18797	-1.80481	-9.46378	6.25292e-05	NA
Foxn4	-3.1654	0.124568	-11.7023	1.76884e-05	NA
Cd59a	-3.15229	-0.199494	-14.1637	5.58171e-06	NA
Nlrp4c	-3.1441	-1.35982	-8.16188	0.000148192	NA
Fermt1	-3.09396	1.73294	-12.8556	1.00414e-05	NA
Gdpd3	-3.09216	0.462548	-18.1255	1.23654e-06	NA
Kcnq5	-3.00314	-1.09386	-8.7137	0.000101408	Neuronal_System
Slc39a8	-2.94698	-0.985393	-5.17709	0.00182714	Metal_ion_SLC_transporters
Tex13	-2.88736	1.60181	-10.9649	2.61168e-05	NA
Xlr5a	-2.87885	-1.54542	-7.17657	0.000309004	NA
Gm364	-2.82111	-1.52012	-6.33055	0.000621942	NA
Efhc2	-2.78285	-0.576344	-12.2203	1.3633e-05	NA
Syt4	-2.75144	-1.39027	-11.0154	2.5411e-05	NA
Slfn3	-2.72455	-0.191004	-5.60232	0.00120573	NA
BC064078	-2.72109	1.24588	-17.0377	1.80746e-06	NA
Cdkl4	-2.67474	0.329105	-10.6483	3.11047e-05	NA
Tmem117	-2.65464	0.531226	-5.57654	0.00123571	NA
Gad2	-2.62166	-0.303471	-12.3631	1.27112e-05	GABA_synthesis_release_reuptake_and_degradation,Neuronal_System,Transmission_across_Chemical_Synapses
Trpc6	-2.55953	0.494394	-4.45215	0.00392268	Axon_guidance
Cadps2	-2.53127	-0.19849	-6.83804	0.000405444	NA
Tspan7	-2.50889	1.04633	-9.19011	7.4293e-05	Glutamate_Binding_Activation_of_AMPA_Receptors,Neuronal_System,Neurotransmitter_Receptor_Binding_And_Downstream,Trafficking_of_AMPA_receptors,Transmission_across_Chemical_Synapses
Apba2	-2.5073	1.14842	-10.9147	2.68423e-05	NA
Arntl2	-2.47247	1.44855	-4.71991	0.00293308	NA
Hmgcll1	-2.44831	-1.1651	-8.39743	0.000125708	NA
Ccrn4l	-2.44565	5.34054	-11.4015	2.06778e-05	NA
Flt4	-2.42877	0.333875	-16.3316	2.34212e-06	NA
Lipa	-2.40768	1.81405	-5.72111	0.00107783	NA
Hmgn3	-2.40656	-0.0704047	-9.38578	6.56483e-05	NA
Ror1	-2.39562	-0.53723	-8.42858	0.000123039	NA
Heph	-2.39383	2.56372	-5.57436	0.00123828	Metal_ion_SLC_transporters
Gsx2	-2.37664	-1.35934	-7.4858	0.000243268	NA
Alcam	-2.3555	1.49469	-4.48428	0.00378614	LEIN_NEURON_MARKERS,Axon_guidance,L1CAM_interactions
Hist1h1t	-2.33541	0.94949	-8.50319	0.000116905	NA
Wnt7b	-2.32762	-0.0875739	-6.51751	0.000529648	NA
Serpina3m	-2.32297	0.772615	-8.94968	8.67671e-05	NA
Xlr3a	-2.32197	2.21224	-10.6372	3.12971e-05	NA
Rhox1	-2.31628	-0.838732	-6.62268	0.000484645	NA
Pnma5	-2.31142	2.66882	-24.2021	2.08057e-07	NA
Nsg2	-2.30925	-1.18317	-6.68186	0.000461245	LEIN_NEURON_MARKERS
Xlr4a	-2.30572	0.614027	-8.43045	0.000122881	NA
Rab39b	-2.28062	0.336876	-4.15818	0.00546311	NA
Rhox4a	-2.25895	-0.953487	-5.71606	0.00108294	NA
Gm9732	-2.24916	1.21979	-4.36035	0.00434422	NA
Hist3h2ba	-2.24672	3.47883	-31.2673	4.2544e-08	NA
Chrna9	-2.24333	0.569353	-11.5263	1.93718e-05	Neuronal_System,Neurotransmitter_Receptor_Binding_And_Downstream,Transmission_across_Chemical_Synapses
Herc6	-2.22156	-0.457001	-5.88007	0.000930061	NA
Crispld1	-2.20001	1.3855	-11.3859	2.08479e-05	NA
Gpr83	-2.19287	0.377921	-4.00752	0.0065064	NA
Ccnd2	-2.16337	0.200106	-10.3224	3.74195e-05	NA
Neu3	-2.13833	0.968617	-13.0125	9.3317e-06	NA
Gm11019	-2.1351	6.02254	-23.8574	2.27354e-07	NA
Fndc1	-2.13271	-0.771543	-6.66798	0.000466616	NA
B230314M03Rik	-2.1256	0.618501	-6.86791	0.000395672	NA
Ano3	-2.10417	0.996306	-15.3554	3.41295e-06	NA
Abcc2	-2.08465	-0.403257	-8.70726	0.000101846	NA
Usp9y	-2.08026	-1.01198	-8.88079	9.07737e-05	NA
Mthfd2l	-2.03106	2.06964	-13.2355	8.41995e-06	NA
4930502E18Rik	-2.01507	0.87284	-8.02026	0.000163924	NA
Penk	-2.01062	-0.0734232	-8.18721	0.000145565	NA
Ccdc85a	-2.00795	2.25604	-5.81412	0.000988383	NA
Ept1	-2.00146	4.43731	-7.33845	0.000272356	NA
Pla2g16	-1.9922	0.0156941	-5.54707	0.00127101	NA
Jph1	-1.98561	-0.686201	-6.5315	0.000523393	NA
Cacng7	-1.95321	0.375627	-9.44316	6.33368e-05	NA
Prex2	-1.94288	0.872448	-10.2608	3.87733e-05	NA
4930550L24Rik	-1.94091	-0.379759	-4.89699	0.00243356	NA
Vstm2a	-1.93855	0.388926	-9.20285	7.36917e-05	NA
Kif1a	-1.88543	1.46147	-12.1732	1.39537e-05	NA
Raet1c	-1.85732	1.62758	-7.49827	0.000240975	NA
Fam115a	-1.84823	1.81467	-11.3254	2.15246e-05	LEIN_NEURON_MARKERS
Colec12	-1.84675	2.16603	-5.3075	0.00160455	NA
Pde1c	-1.83926	-0.976569	-3.91658	0.00724241	NA
Fbn2	-1.83778	0.522284	-6.33176	0.000621289	NA
Nrp2	-1.82949	4.45172	-4.68559	0.0030427	Axon_guidance,L1CAM_interactions,NrCAM_interactions
Gm20548	-1.82596	-0.557209	-4.16231	0.00543725	NA
Xlr3b	-1.81119	1.99817	-4.54966	0.00352442	NA
Fgf15	-1.80849	-0.968946	-8.46457	0.000120035	Axon_guidance
Btla	-1.80533	-0.836067	-6.55388	0.000513566	NA
Gm12260	-1.80403	2.08301	-12.7817	1.03973e-05	NA
Prrg1	-1.80096	-0.555919	-5.11697	0.00194137	NA
Pla2g4a	-1.79781	2.75766	-9.98255	4.56352e-05	NA
Trim36	-1.75721	-0.275682	-4.37675	0.00426531	NA
Hr	-1.75473	1.30935	-5.48959	0.00134324	NA
Loxl4	-1.72266	3.31725	-12.1806	1.39023e-05	NA
Hs6st2	-1.71746	-0.541319	-8.73299	0.000100109	NA
Grm4	-1.71281	0.251189	-8.54299	0.000113778	NA
Hhip	-1.71159	1.32159	-14.2706	5.33234e-06	NA
Zc3h12b	-1.70898	-0.753346	-6.76571	0.000430269	NA
Smpdl3a	-1.69558	0.478864	-5.25933	0.00168301	NA
Cnksr2	-1.6948	1.01133	-7.21316	0.000300249	Axon_guidance
She	-1.68938	1.28256	-8.19441	0.000144828	NA
Fndc4	-1.67713	1.1644	-5.91068	0.000904333	NA
Otud6a	-1.67027	-0.324125	-4.17825	0.00533871	NA
Itga10	-1.66481	-0.0118065	-7.23478	0.000295211	Axon_guidance,L1CAM_interactions
Pde3b	-1.66371	2.4354	-14.939	4.03576e-06	NA
Fabp5	-1.65011	5.31767	-11.2513	2.23864e-05	NA
Ltk	-1.64988	-0.0220948	-4.06686	0.0060711	NA
D630039A03Rik	-1.64789	3.13533	-5.02549	0.00213096	NA
Crabp1	-1.64423	2.22631	-5.1288	0.00191828	NA
Itga8	-1.62678	-0.945929	-7.52936	0.000235362	NA
Nrcam	-1.62236	2.44213	-5.53472	0.00128615	Axon_guidance,L1CAM_interactions,NrCAM_interactions
Trpa1	-1.61491	3.69193	-13.4692	7.57285e-06	NA
Tmprss5	-1.60495	-0.709288	-4.85428	0.00254463	NA
Inhbb	-1.59259	0.492855	-8.21937	0.000142306	NA
Hist3h2bb-ps	-1.59132	3.17165	-16.5075	2.19353e-06	NA
Tmem28	-1.58876	0.901078	-5.54605	0.00127226	NA
Bag2	-1.58371	1.27825	-6.94943	0.000370347	NA
Mid1ip1	-1.58366	2.83339	-10.7062	3.01155e-05	NA
Sema3e	-1.57702	-0.476586	-6.30866	0.000633898	Axon_guidance
Nfasc	-1.57212	0.467619	-6.21698	0.000686917	Axon_guidance,L1CAM_interactions
Abat	-1.56729	0.077554	-5.8486	0.00095739	GABA_synthesis_release_reuptake_and_degradation,Neuronal_System,Transmission_across_Chemical_Synapses
Tgfbr3	-1.56211	1.19418	-8.20361	0.000143892	NA
Dach2	-1.56055	0.409562	-5.27964	0.00164941	NA
9030418K01Rik	-1.55784	0.259892	-5.34369	0.00154834	NA
Luzp4	-1.55572	-0.704542	-5.15564	0.00186701	NA
Pak3	-1.5443	0.0292801	-4.52535	0.00361931	Axon_guidance
Nkx1-2	-1.54202	2.8713	-7.34391	0.000271209	NA
Notum	-1.54032	6.74369	-20.2673	6.22113e-07	NA
Ptpla	-1.5339	1.70617	-9.39442	6.52942e-05	NA
Fgfr2	-1.53309	1.93795	-12.153	1.40935e-05	Axon_guidance
Kctd12b	-1.53307	0.73194	-5.8453	0.000960304	NA
CAAA01202134.1.17058.1	-1.52591	0.626175	-4.67021	0.00309331	NA
Cyp2b23	-1.52221	-0.719515	-3.72495	0.00911494	NA
Ptgs2	-1.52005	1.90823	-3.91514	0.00725476	NA
Cyp7b1	-1.5121	2.4356	-8.45471	0.000120849	NA
Slc30a3	-1.50959	1.84195	-5.46625	0.00137388	Metal_ion_SLC_transporters
AC120136.3	-1.50659	4.84157	-8.5301	0.00011478	NA
Ikzf1	-1.50291	0.253011	-5.33726	0.00155816	NA
Usp26	-1.50247	1.32542	-11.949	1.56044e-05	NA
Adamts13	-1.50238	-0.188649	-7.77798	0.000195496	NA
T	-1.50015	-0.543595	-6.07484	0.000779402	NA
Gm6166	-1.48674	0.689098	-3.87891	0.00757391	NA
Chst11	-1.47889	1.2484	-4.34741	0.00440758	NA
Slc16a3	-1.47428	3.26469	-5.93187	0.000886993	NA
Tmem132c	-1.47316	1.50114	-10.2355	3.93449e-05	NA
Rgnef	-1.46704	-0.214541	-5.22212	0.00174657	NA
Ptger4	-1.46622	0.828042	-6.85585	0.000399585	NA
Fat2	-1.46217	3.4186	-11.6709	1.79757e-05	NA
Ptchd3	-1.44997	-0.507785	-6.52286	0.000527247	NA
3632451O06Rik	-1.42655	3.87602	-9.06801	8.03494e-05	NA
Rsph4a	-1.41895	0.369585	-4.698	0.00300256	NA
Gm14074	-1.41876	1.68675	-4.3209	0.0045407	NA
Rims1	-1.41829	3.74087	-20.1174	6.51219e-07	GABA_synthesis_release_reuptake_and_degradation,Neuronal_System,Transmission_across_Chemical_Synapses
Bin1	-1.41771	2.16676	-11.1816	2.32349e-05	NA
Zcchc18	-1.4159	0.236592	-6.78215	0.000424478	NA
Vopp1	-1.40506	1.47276	-10.3381	3.70838e-05	NA
Nalcn	-1.40357	0.242366	-6.70758	0.000451483	NA
Krtdap	-1.40346	1.67965	-4.60304	0.00332574	NA
Cpvl	-1.39515	1.68048	-5.89445	0.000917873	NA
Cend1	-1.3932	-0.549045	-4.31651	0.0045632	NA
Tcf15	-1.38312	-0.553998	-3.66745	0.00977685	NA
Rsad2	-1.37785	-0.288202	-4.24967	0.00492119	NA
Ncam1	-1.36977	5.0058	-24.5902	1.88558e-07	Axon_guidance,L1CAM_interactions
Stc2	-1.36308	2.82304	-8.22457	0.000141787	NA
Tex19.1	-1.36276	5.50085	-23.0297	2.82808e-07	NA
U4	-1.36194	2.77472	-5.05714	0.0020631	NA
Tceal1	-1.3532	-0.21464	-6.59332	0.000496752	NA
Sfrp2	-1.3464	1.66185	-3.92629	0.00715959	NA
Adamts1	-1.34436	0.114413	-5.65326	0.00114888	NA
Man1a	-1.34399	1.15036	-6.11658	0.000750847	NA
Mlf1	-1.3276	-0.614731	-4.10313	0.00582104	NA
Taf9b	-1.32605	-0.161098	-5.6633	0.00113804	NA
Cpne8	-1.32561	-0.0101708	-5.40793	0.00145396	NA
Ltbp1	-1.31285	2.44034	-6.20269	0.000695626	NA
Cdk14	-1.30871	0.151372	-6.94967	0.000370274	NA
SNORA79	-1.30712	1.4561	-4.09926	0.00584715	NA
Klhl13	-1.30468	6.03965	-5.02382	0.00213461	NA
Ankrd35	-1.30382	5.23475	-5.76134	0.00103806	NA
Gpc1	-1.29916	4.19716	-11.7116	1.76043e-05	Axon_guidance
Fbln7	-1.29178	0.0354526	-5.98492	0.000845211	NA
2810417H13Rik	-1.29129	5.17422	-6.48097	0.000546386	NA
Hecw2	-1.28743	1.18464	-4.32662	0.00451159	NA
Scml2	-1.28525	1.06145	-7.01908	0.000350166	NA
Sohlh2	-1.28351	2.97555	-7.5668	0.000228801	NA
Dnttip1	-1.28243	3.29774	-4.87587	0.00248779	NA
Ano1	-1.27815	1.71958	-4.97289	0.00224938	NA
Msc	-1.27607	4.18196	-17.1224	1.7534e-06	NA
Cabp7	-1.26923	0.142141	-4.6439	0.00318211	NA
5730469M10Rik	-1.26831	4.51713	-6.95678	0.000368154	NA
Sstr2	-1.26784	1.67075	-5.37205	0.00150584	NA
Tmem47	-1.26437	5.15634	-6.03258	0.000809572	NA
Spats2l	-1.26246	4.40807	-4.61606	0.00327917	NA
Tmem90b	-1.26217	0.68344	-6.08613	0.000771561	NA
Slc25a27	-1.25993	0.488111	-4.07798	0.00599316	NA
6030419C18Rik	-1.25895	0.519921	-4.68234	0.00305334	NA
Snora74a	-1.25267	4.86827	-7.09481	0.000329637	NA
Cdh2	-1.24246	3.07281	-12.0605	1.4757e-05	NA
Arhgap31	-1.23923	-0.686331	-4.63353	0.00321789	NA
Pcsk9	-1.2384	2.84557	-3.69279	0.00947882	NA
Sept6	-1.23608	2.74713	-6.11296	0.000753278	NA
Napsa	-1.23556	0.492618	-3.94224	0.00702581	NA
Gad1	-1.23453	1.73524	-9.73601	5.29046e-05	GABA_synthesis_release_reuptake_and_degradation,Neuronal_System,Transmission_across_Chemical_Synapses
Gprc5b	-1.23077	3.14179	-8.10764	0.000154003	NA
Gabrb2	-1.23072	0.198809	-7.61751	0.000220248	Neuronal_System,Neurotransmitter_Receptor_Binding_And_Downstream,Transmission_across_Chemical_Synapses
AW551984	-1.22818	-0.329209	-4.67796	0.00306769	NA
Celf4	-1.22549	2.20806	-7.91669	0.000176644	NA
Chrna7	-1.22318	1.61456	-4.65371	0.00314868	Neuronal_System,Neurotransmitter_Receptor_Binding_And_Downstream,Transmission_across_Chemical_Synapses
Hhat	-1.22053	1.79146	-9.84354	4.95812e-05	NA
Nudt10	-1.21788	0.0973326	-6.18161	0.000708701	NA
U2	-1.21638	6.13371	-7.18857	0.0003061	NA
Gja1	-1.21141	6.10636	-24.9143	1.73884e-07	NA
Zfp560	-1.20052	0.459144	-5.48275	0.00135213	NA
Lef1	-1.18777	0.768919	-4.87898	0.00247973	NA
Btbd11	-1.18704	3.99397	-8.44262	0.000121857	NA
Iqcg	-1.18615	2.62878	-9.83963	4.96978e-05	NA
4732444A12Rik	-1.18079	1.4014	-4.3319	0.00448491	NA
Nkx6-3	-1.17829	3.24462	-4.57022	0.00344635	NA
Cyct	-1.17311	1.05883	-5.59978	0.00120865	NA
Ugt8a	-1.17265	3.1706	-12.3562	1.27539e-05	NA
Basp1	-1.16649	3.8038	-3.89332	0.00744514	NA
Gpx3	-1.16429	0.805214	-6.87001	0.000394996	NA
Mtap2	-1.16328	3.83199	-11.8863	1.61062e-05	NA
Steap2	-1.15865	1.50367	-4.67341	0.00308272	NA
Acot1	-1.15558	1.35641	-5.89311	0.000919	NA
Card6	-1.15436	0.730314	-4.4832	0.00379065	NA
Bhlhe41	-1.13764	1.24147	-7.03696	0.00034519	NA
Igfbp3	-1.1345	3.56333	-5.25075	0.00169742	NA
Fgf17	-1.13209	3.13341	-4.10105	0.00583508	Axon_guidance
Atp2b4	-1.13142	4.80823	-6.28426	0.000647537	NA
Lonrf3	-1.13104	1.37572	-5.64428	0.00115869	NA
Igsf1	-1.12421	-0.478394	-4.47788	0.00381289	NA
Lca5	-1.1132	2.16564	-5.14691	0.00188351	NA
Col11a1	-1.11019	3.43975	-13.2162	8.49454e-06	NA
Slc12a8	-1.10632	4.20086	-12.4401	1.22444e-05	NA
Pgrmc1	-1.09828	6.1708	-4.95698	0.00228665	NA
Clip3	-1.09499	1.12261	-6.7652	0.000430449	NA
Nudt11	-1.09012	1.85592	-7.51724	0.000237532	NA
Slc40a1	-1.08918	-0.337984	-4.87973	0.00247778	Metal_ion_SLC_transporters
Lrig3	-1.08646	4.70912	-4.83776	0.00258912	NA
Ccdc136	-1.07702	3.78616	-15.9538	2.70238e-06	NA
Ttc32	-1.07294	1.58367	-7.6953	0.000207826	NA
Fam49a	-1.06843	1.37373	-5.28579	0.00163938	LEIN_NEURON_MARKERS
C530008M17Rik	-1.06684	0.547689	-4.45487	0.00391091	NA
Acacb	-1.0559	5.79104	-4.49746	0.00373166	NA
Sgcb	-1.05106	1.2273	-5.34803	0.00154175	NA
Sept1	-1.04577	5.8439	-17.0894	1.77422e-06	NA
Snta1	-1.04522	3.05453	-9.34224	6.74672e-05	NA
Matn2	-1.04483	-0.0916404	-5.83723	0.00096749	NA
Prdm5	-1.03767	3.12612	-4.214	0.00512498	NA
Slc25a31	-1.03642	-0.608494	-5.18128	0.00181948	NA
Dlg4	-1.03223	0.197215	-4.6962	0.00300834	Axon_guidance,Glutamate_Binding_Activation_of_AMPA_Receptors,L1CAM_interactions,Neuronal_System,Neurotransmitter_Receptor_Binding_And_Downstream,NrCAM_interactions,Trafficking_of_AMPA_receptors,Transmission_across_Chemical_Synapses
Ak3	-1.03011	2.25562	-5.03413	0.00211218	NA
AC099934.1	-1.02634	12.8553	-6.16719	0.000717809	NA
AC157822.1	-1.02238	12.9981	-6.42558	0.000572922	NA
Pirt	-1.02125	3.26259	-4.54504	0.00354225	NA
Grip1	-1.02031	0.165338	-4.27252	0.00479539	Glutamate_Binding_Activation_of_AMPA_Receptors,Neuronal_System,Neurotransmitter_Receptor_Binding_And_Downstream,Trafficking_of_AMPA_receptors,Transmission_across_Chemical_Synapses
Hspa4l	-1.01654	2.39732	-5.1869	0.00180924	NA
1700010I14Rik	-1.0038	0.124675	-4.10798	0.00578845	NA
Lrrc9	-0.998818	0.714002	-5.76251	0.00103692	NA
Crim1	-0.997036	1.46822	-6.94292	0.000372299	NA
Nucb2	-0.994685	1.6751	-8.96004	8.61824e-05	NA
Plch1	-0.991826	3.14548	-8.06185	0.000159113	NA
Acbd7	-0.99122	-0.373925	-4.24342	0.00495625	NA
Rhobtb3	-0.988293	3.49151	-9.23902	7.20152e-05	NA
Snora73b	-0.985256	7.04365	-5.04406	0.00209083	NA
Pcyt1b	-0.984073	4.55053	-8.07069	0.000158112	NA
S1pr1	-0.983164	3.6292	-6.31803	0.00062875	NA
Scarna6	-0.975264	4.03449	-4.21216	0.00513572	NA
Gulp1	-0.971953	2.54484	-4.68916	0.00303111	NA
Cyp39a1	-0.969788	1.27962	-5.09122	0.00199272	NA
Il1rap	-0.968365	1.60042	-4.18189	0.00531655	NA
1700034H14Rik	-0.965029	3.35158	-10.441	3.4965e-05	NA
Pde5a	-0.963488	2.70798	-6.40481	0.000583249	NA
Cryl1	-0.963327	1.30588	-5.57516	0.00123734	NA
Tnfrsf19	-0.962924	4.27503	-15.3216	3.45921e-06	NA
Spin2	-0.956641	1.08796	-6.02281	0.000816742	NA
P4ha1	-0.954543	4.9996	-13.0521	9.16151e-06	NA
Eml1	-0.952048	1.47803	-4.44402	0.00395811	NA
SCARNA6	-0.951391	3.33255	-4.69391	0.00301572	NA
Chst10	-0.949342	2.36169	-3.96613	0.00683059	NA
Tek	-0.946676	4.88078	-15.9616	2.69434e-06	Axon_guidance
Gm8909	-0.94047	4.61786	-12.044	1.48792e-05	NA
B230120H23Rik	-0.939214	4.45225	-4.63672	0.00320684	NA
Sfmbt2	-0.937993	5.20668	-7.53388	0.000234559	NA
Epb4.1l3	-0.937072	3.46352	-7.31249	0.000277882	NA
Nap1l3	-0.930879	0.925202	-6.00499	0.000829994	NA
Mfsd6	-0.930115	1.61315	-5.35102	0.00153722	NA
Mpdz	-0.928891	3.17433	-10.3682	3.64481e-05	NA
Magee1	-0.926128	0.723848	-4.56502	0.00346593	NA
Il17d	-0.925213	0.36754	-4.13438	0.00561472	NA
snoU6-77	-0.924874	1.98849	-4.38415	0.00423026	NA
Elavl3	-0.923515	0.391018	-5.61022	0.00119671	NA
Cmpk2	-0.92107	0.603018	-4.09053	0.00590655	NA
Gm5124	-0.919244	0.548727	-4.97469	0.00224521	NA
Tub	-0.914635	2.1861	-4.06508	0.00608364	NA
Gm7334	-0.911381	3.58092	-10.328	3.72998e-05	NA
Map3k15	-0.906949	1.18305	-5.04797	0.00208249	NA
Perp	-0.905602	2.83859	-5.54851	0.00126927	NA
Ifngr1	-0.904469	1.92432	-4.19874	0.00521503	NA
Ptbp2	-0.903533	5.35127	-15.4336	3.30873e-06	NA
Telomerase-vert	-0.903468	4.60792	-3.93503	0.00708592	NA
Syce1	-0.903202	3.45833	-10.0319	4.4323e-05	NA
Pkd1l2	-0.901295	1.75561	-7.29896	0.000280815	NA
Serpini1	-0.900284	2.7177	-5.50397	0.00132474	NA
Elavl4	-0.900181	0.970487	-5.49576	0.00133527	NA
Sec14l1	-0.899108	7.07179	-4.10149	0.00583206	NA
Nup62cl	-0.886899	4.52085	-11.4497	2.01622e-05	NA
Slco5a1	-0.885209	4.25869	-7.39839	0.000260066	NA
Lhpp	-0.884331	4.36143	-4.26832	0.00481822	NA
Akt3	-0.883128	3.95143	-7.028	0.000347674	NA
Ndn	-0.881474	1.72556	-7.38426	0.000262907	NA
2900011O08Rik	-0.879153	3.19189	-4.0677	0.00606519	LEIN_NEURON_MARKERS
Slc36a4	-0.879106	0.44624	-3.77964	0.00853106	NA
Hormad2	-0.878037	2.23195	-6.44534	0.000563291	NA
Rps6ka2	-0.877958	6.35376	-4.07298	0.00602809	Axon_guidance,L1CAM_interactions,Neuronal_System,Neurotransmitter_Receptor_Binding_And_Downstream,Transmission_across_Chemical_Synapses
Nbea	-0.876019	3.17218	-6.17803	0.000710952	NA
Reep1	-0.87499	4.5057	-3.89328	0.00744557	NA
Socs3	-0.874613	6.21102	-11.1518	2.36085e-05	NA
Sult6b1	-0.871091	3.18998	-8.40308	0.000125219	NA
Otub2	-0.866829	1.84602	-5.40064	0.00146433	NA
2610002M06Rik	-0.866004	2.35683	-4.37971	0.00425124	NA
Ntn1	-0.863206	6.74063	-6.54731	0.000516427	Axon_guidance
Pam	-0.851952	2.8412	-4.92995	0.00235157	NA
Zxda	-0.85036	0.560866	-4.17201	0.00537707	NA
Zfp54	-0.840793	1.15513	-4.74638	0.00285157	NA
Dbn1	-0.836581	2.25531	-4.59421	0.00335769	NA
Gm3512	-0.836191	0.409118	-4.65868	0.00313189	NA
Schip1	-0.836052	6.27649	-10.5577	3.27276e-05	NA
Car12	-0.833628	1.9364	-4.63199	0.00322322	NA
Gpr98	-0.832939	3.47805	-4.18413	0.00530288	NA
Rps6kl1	-0.831785	3.51537	-5.36473	0.00151668	NA
Rnf113a1	-0.831002	1.88251	-6.62235	0.00048478	NA
Btg3	-0.830461	3.67846	-11.414	2.0543e-05	NA
Amhr2	-0.828193	2.21006	-4.53578	0.00357824	NA
Tagln3	-0.825306	1.33157	-4.43617	0.00399264	NA
Kcnt2	-0.824399	0.861349	-4.30231	0.00463673	NA
Tro	-0.823902	4.24993	-4.47408	0.00382893	NA
SNORA73	-0.823813	5.38342	-4.53223	0.00359217	NA
Serinc5	-0.823352	3.35999	-6.95283	0.00036933	NA
AK129341	-0.818783	2.32193	-7.39765	0.000260215	NA
Slc4a5	-0.816965	4.08268	-10.537	3.31113e-05	NA
Ift57	-0.816402	3.21523	-9.57784	5.82703e-05	NA
Trim21	-0.815768	1.01469	-5.65421	0.00114785	NA
Pls3	-0.814721	6.44807	-8.64439	0.000106234	NA
Ppt2	-0.810153	1.93797	-5.7518	0.00104734	NA
Slc30a1	-0.807634	5.42375	-4.16649	0.0054112	Metal_ion_SLC_transporters
H2-M5	-0.807176	4.90575	-5.30291	0.00161185	NA
Ccdc39	-0.804885	1.49081	-5.46673	0.00137324	NA
9330159M07Rik	-0.803439	0.874196	-3.67834	0.00964751	NA
Ets2	-0.802094	5.13817	-7.75724	0.000198509	NA
Plxdc2	-0.80084	1.60745	-4.97875	0.00223583	NA
Snora78	-0.799981	3.52027	-4.32964	0.00449631	NA
Ptpmt1	-0.799773	3.44093	-6.23784	0.000674423	NA
AC156953.1	-0.789423	4.3854	-3.89186	0.00745807	NA
Ugdh	-0.788885	5.99678	-4.97545	0.00224345	NA
Rsph1	-0.787729	1.67703	-3.74298	0.00891772	NA
Elovl4	-0.786636	2.05723	-4.13877	0.0055864	NA
Enah	-0.786624	7.81568	-6.19213	0.000702142	Axon_guidance
Nhedc1	-0.782857	2.4636	-4.37249	0.00428564	NA
Itpka	-0.780577	4.80392	-6.3386	0.000617607	NA
RP23-349B16.3	-0.780251	0.398328	-4.00599	0.00651811	NA
3110003A17Rik	-0.778386	3.68723	-4.40383	0.00413857	NA
Serpinb1b	-0.778177	0.678874	-4.16583	0.00541528	NA
Yaf2	-0.777455	1.93001	-6.23816	0.000674233	NA
Ero1lb	-0.77588	1.76402	-6.4859	0.000544093	NA
Golim4	-0.775586	2.51309	-7.3029	0.000279956	NA
Uprt	-0.773202	1.04961	-3.76618	0.00867076	NA
Morc4	-0.772375	1.23943	-3.95596	0.00691291	NA
Pip5kl1	-0.767848	0.260754	-3.74734	0.00887073	NA
Arxes1	-0.764138	3.08933	-5.61702	0.001189	NA
Myo6	-0.763952	4.17877	-12.5212	1.17735e-05	Glutamate_Binding_Activation_of_AMPA_Receptors,Neuronal_System,Neurotransmitter_Receptor_Binding_And_Downstream,Trafficking_of_AMPA_receptors,Transmission_across_Chemical_Synapses
Prodh	-0.762842	3.93241	-5.69092	0.00110881	NA
Ccnd1	-0.761865	7.2031	-4.63541	0.00321138	NA
Gm9766	-0.760282	0.968402	-3.88955	0.0074786	NA
Tubb6	-0.759501	3.9868	-5.9085	0.000906133	NA
Cited2	-0.757063	3.25889	-4.82497	0.00262416	NA
Uhrf2	-0.753043	5.19052	-12.3117	1.30341e-05	NA
6530418L21Rik	-0.751533	1.06442	-4.75916	0.00281312	NA
Tspan6	-0.749866	3.73775	-3.78242	0.00850248	NA
Zic2	-0.749233	5.12597	-3.79186	0.0084063	NA
Ccdc46	-0.74861	0.164903	-4.53437	0.00358376	NA
Irak1bp1	-0.746008	2.75989	-6.49107	0.000541698	NA
Zfp768	-0.737538	1.72669	-4.45427	0.00391354	NA
Hdac8	-0.735857	2.3947	-5.51269	0.00131367	NA
Prps2	-0.73394	2.99605	-5.96774	0.000858493	NA
Slc25a12	-0.732883	4.87159	-11.6212	1.84417e-05	NA
Fam26e	-0.732849	2.80057	-5.38991	0.00147976	NA
Erap1	-0.732072	1.92759	-3.68956	0.00951628	NA
Trp53inp2	-0.72918	2.89484	-4.26586	0.00483165	NA
Pim2	-0.726758	2.88797	-6.58995	0.000498166	NA
Tmx4	-0.724106	3.41808	-7.27312	0.000286513	NA
Nxt2	-0.722524	5.12714	-5.992	0.000839808	NA
Cisd3	-0.720891	4.27561	-4.05378	0.00616417	NA
Gpr125	-0.720645	6.00797	-5.46577	0.00137451	NA
Snord17	-0.720474	3.80796	-4.86901	0.00250569	NA
Tbc1d16	-0.720214	4.49684	-10.2856	3.82226e-05	NA
Gjb4	-0.716275	2.72614	-4.52632	0.00361543	NA
Dnahc8	-0.713464	6.08286	-4.06546	0.00608099	NA
Dsel	-0.713417	3.74884	-6.89139	0.000388181	NA
Arxes2	-0.713235	3.84984	-4.14937	0.00551869	NA
Stxbp5	-0.712468	2.55709	-4.14508	0.00554601	NA
Pabpc4l	-0.708278	0.496276	-4.03005	0.00633714	NA
Lrig1	-0.707994	6.11576	-4.20339	0.00518739	NA
Itgb3bp	-0.70755	2.17021	-5.17972	0.00182232	NA
Nab1	-0.705751	2.55969	-4.2536	0.00489928	NA
Pgm2	-0.704294	4.15468	-5.06334	0.00205008	NA
Prrg3	-0.704227	2.17198	-3.71446	0.00923185	NA
Sh3bgrl	-0.704087	4.83749	-5.79026	0.00101049	NA
Vgll3	-0.703008	1.69958	-4.02346	0.00638616	NA
Lrrc15	-0.702326	5.34684	-7.85393	0.000184903	NA
Atp8b2	-0.701222	7.90434	-5.79489	0.00100616	NA
9430020K01Rik	-0.700327	3.35016	-4.65269	0.00315214	NA
Sri	-0.698884	3.58496	-6.50237	0.000536512	NA
D1Ertd622e	-0.698392	2.86625	-6.66716	0.000466934	NA
Cxx1b	-0.696205	1.58468	-4.67365	0.00308191	NA
l7Rn6	-0.695933	5.4333	-13.0095	9.34463e-06	NA
Neto2	-0.689236	2.35829	-4.07721	0.00599856	NA
U1	-0.685841	6.04871	-5.98404	0.000845889	NA
Rab13	-0.685524	1.25539	-3.72552	0.00910858	NA
Dzip1l	-0.685503	2.39813	-5.23005	0.0017328	NA
Gnai1	-0.682197	3.99591	-4.79347	0.00271278	Neuronal_System,Neurotransmitter_Receptor_Binding_And_Downstream,Transmission_across_Chemical_Synapses
9230110C19Rik	-0.680892	0.485819	-4.38403	0.00423082	NA
Acadvl	-0.678865	3.61945	-8.3282	0.000131882	NA
Stmn2	-0.67755	6.97162	-8.05257	0.000160172	NA
Stard4	-0.669987	4.59174	-5.9839	0.000845991	NA
Zrsr1	-0.667424	3.82354	-9.21983	7.28993e-05	NA
Acsl6	-0.665829	2.60436	-4.52778	0.00360968	NA
Zxdb	-0.665638	1.62774	-4.99234	0.00220475	NA
Oat	-0.664259	6.5285	-7.85072	0.000185337	NA
Armcx2	-0.662676	3.95827	-9.39319	6.53444e-05	NA
Snhg11	-0.658274	3.8514	-6.82603	0.00040945	NA
Gli2	-0.6568	4.97356	-4.78848	0.00272712	NA
Tmem17	-0.655881	1.7203	-3.91872	0.00722409	NA
Ccdc73	-0.655677	1.61234	-4.14811	0.00552666	NA
Nfatc4	-0.65265	4.82197	-9.84129	4.96484e-05	NA
Mkx	-0.64881	1.66101	-4.32375	0.00452617	NA
Homez	-0.647786	2.33998	-4.199	0.00521349	NA
SNORA48	-0.647484	3.72172	-5.5736	0.00123918	NA
St3gal3	-0.645329	4.56995	-5.90224	0.000911346	NA
Gm10499	-0.642491	5.98518	-7.17877	0.000308468	NA
Dnajc3	-0.640352	6.1328	-5.67599	0.0011245	NA
Fkbp7	-0.63971	0.874758	-4.11815	0.00572083	NA
Lemd2	-0.638676	5.44975	-8.93125	8.78188e-05	NA
Ripk2	-0.638483	3.36118	-6.73056	0.000442957	NA
Morn4	-0.638151	2.79168	-5.29417	0.00162585	NA
Itm2a	-0.637108	4.07972	-9.08392	7.95293e-05	NA
Ppm1h	-0.635212	2.98882	-5.88606	0.000924959	NA
RNase_MRP	-0.63229	11.8503	-4.28963	0.00470352	NA
Msl3l2	-0.632115	0.727877	-3.84091	0.00792548	NA
Gpcpd1	-0.631173	3.73438	-7.50094	0.000240486	NA
1500009L16Rik	-0.630163	2.26616	-3.72048	0.00916461	NA
E130012A19Rik	-0.628936	6.76755	-5.98736	0.000843347	NA
D16Ertd472e	-0.627478	4.81251	-8.67249	0.000104246	NA
Rcor2	-0.625644	6.29134	-6.82796	0.000408804	NA
Khdrbs3	-0.623773	4.37705	-4.48115	0.00379921	NA
Nr3c1	-0.622349	3.20661	-3.74869	0.00885626	NA
Calb2	-0.619943	3.80097	-4.8148	0.00265243	NA
N6amt2	-0.617022	3.82319	-5.89007	0.000921567	NA
Lpar6	-0.615187	4.03603	-6.59381	0.000496549	NA
Ldha	-0.613532	8.37507	-4.17668	0.00534838	NA
BC016423	-0.613193	6.04902	-9.21877	7.29486e-05	NA
Spats1	-0.612357	2.07261	-5.41566	0.00144305	NA
Pid1	-0.611202	4.29859	-5.78676	0.00101379	NA
B3gnt3	-0.608615	3.19365	-4.31708	0.00456027	NA
Zfp280c	-0.608554	4.86108	-10.3304	3.72477e-05	NA
Gm10391	-0.607529	1.13993	-3.77662	0.00856214	NA
Adcy1	-0.607304	3.46399	-6.87804	0.000392421	Neuronal_System,Neurotransmitter_Receptor_Binding_And_Downstream,Transmission_across_Chemical_Synapses
Errfi1	-0.606165	3.6687	-4.56342	0.00347196	NA
Cfp	-0.60596	5.22548	-4.58013	0.00340942	NA
Tnfrsf8	-0.605619	3.81944	-5.28877	0.00163456	NA
Ahr	-0.605155	3.9215	-5.21232	0.00176376	NA
Hsd17b7	-0.60416	3.93476	-7.48233	0.000243911	NA
Slc30a4	-0.603522	4.21042	-5.20731	0.00177261	NA
Gm14680	-0.601752	4.75743	-7.08653	0.000331814	NA
Fam102b	-0.600319	1.9723	-3.69006	0.00951048	NA
Sms	-0.600067	5.43357	-10.1178	4.21393e-05	NA
Smtnl1	-0.599529	1.77165	-4.39175	0.00419457	NA
Siah2	-0.59408	1.60621	-4.79123	0.0027192	Axon_guidance
Rfx3	-0.592401	3.18337	-4.78303	0.00274288	NA
Stim1	-0.589244	3.0868	-4.19235	0.00525328	NA
Epha7	-0.588491	2.39613	-5.65372	0.00114838	Axon_guidance
Nt5c	-0.585544	3.99899	-6.73092	0.000442822	NA
Slc33a1	-0.585319	4.18475	-7.08302	0.000332742	NA
Top2b	-0.584768	6.25389	-5.01474	0.00215456	NA
Ankrd37	-0.58179	1.63813	-3.86434	0.00770668	NA

## Sheet: Neural up in Dnttip1 KO vs WT
Gene	log2FC	AveExpr	T.Value	P.Value	Reactome
Id1	1.4101	0.236099	6.35463	0.00060908	NA
Pvrl1	1.30594	3.86269	8.67664	0.000103956	NA
Pacsin1	1.15416	0.283706	4.23737	0.00499041	LEIN_NEURON_MARKERS
Kndc1	1.09648	2.67305	4.47775	0.00381347	NA
Chd5	1.08473	2.24875	6.53527	0.000521725	NA
Sema4a	1.07755	1.68619	4.877	0.00248485	Developmental_Biology
Sema3b	1.01181	4.28829	3.84484	0.0078883	NA
Epha4	0.93101	7.48866	7.96669	0.000170367	Developmental_Biology
Nkx6-2	0.914509	4.98429	7.00274	0.000354787	NA
Sema6c	0.905929	4.71619	4.82655	0.00261981	NA
Lamb2	0.864733	6.29818	11.1528	2.35963e-05	Extracellular_matrix_organization
Satb2	0.844407	1.88064	4.77723	0.00275976	NA
Notch1	0.817027	5.65847	4.24968	0.00492113	Developmental_Biology
Etv1	0.802762	2.51567	6.31212	0.000631995	NA
Csnk1e	0.795276	5.55948	3.84451	0.00789145	NA
Unc5b	0.752094	6.1199	13.6085	7.11504e-06	Developmental_Biology
Fry	0.751946	5.46636	5.35121	0.00153694	NA
Sdc4	0.706962	8.12248	4.91099	0.00239835	Extracellular_matrix_organization
Fzd10	0.702766	5.85718	4.72825	0.00290713	NA
Cacna1a	0.70082	5.38012	4.16993	0.00538987	NA
Nek3	0.667441	3.88646	4.61873	0.00326973	NA
Cdh1	0.633158	9.26589	14.3306	5.19794e-06	Extracellular_matrix_organization,Immune_System
Lrfn1	0.593435	2.40175	3.93765	0.00706397	NA

## Sheet: Neural down in Dnttip1 KO vs WT
Gene	log2FC	AveExpr	T.Value	P.Value	Reactome
En1	-4.24524	-1.72945	-14.0213	5.93507e-06	NA
Nnat	-4.07876	-1.15523	-7.16781	0.000311142	NA
Slit3	-3.78917	-0.762156	-8.53647	0.000114283	Axon_guidance
Foxn4	-3.1654	0.124568	-11.7023	1.76884e-05	NA
Trpc6	-2.55953	0.494394	-4.45215	0.00392268	Axon_guidance
Gsx2	-2.37664	-1.35934	-7.4858	0.000243268	NA
Alcam	-2.3555	1.49469	-4.48428	0.00378614	LEIN_NEURON_MARKERS,Axon_guidance,L1CAM_interactions
Wnt7b	-2.32762	-0.0875739	-6.51751	0.000529648	NA
Prex2	-1.94288	0.872448	-10.2608	3.87733e-05	NA
Nrp2	-1.82949	4.45172	-4.68559	0.0030427	Axon_guidance,L1CAM_interactions,NrCAM_interactions
Nrcam	-1.62236	2.44213	-5.53472	0.00128615	Axon_guidance,L1CAM_interactions,NrCAM_interactions
Nfasc	-1.57212	0.467619	-6.21698	0.000686917	Axon_guidance,L1CAM_interactions
Pak3	-1.5443	0.0292801	-4.52535	0.00361931	Axon_guidance
Fgfr2	-1.53309	1.93795	-12.153	1.40935e-05	Axon_guidance
Cend1	-1.3932	-0.549045	-4.31651	0.0045632	NA
Ncam1	-1.36977	5.0058	-24.5902	1.88558e-07	Axon_guidance,L1CAM_interactions
Gpc1	-1.29916	4.19716	-11.7116	1.76043e-05	Axon_guidance
Pcsk9	-1.2384	2.84557	-3.69279	0.00947882	NA
Gabrb2	-1.23072	0.198809	-7.61751	0.000220248	Neuronal_System,Neurotransmitter_Receptor_Binding_And_Downstream,Transmission_across_Chemical_Synapses
Gja1	-1.21141	6.10636	-24.9143	1.73884e-07	NA
Lef1	-1.18777	0.768919	-4.87898	0.00247973	NA
Ugt8a	-1.17265	3.1706	-12.3562	1.27539e-05	NA
Matn2	-1.04483	-0.0916404	-5.83723	0.00096749	NA
Dlg4	-1.03223	0.197215	-4.6962	0.00300834	Axon_guidance,Glutamate_Binding_Activation_of_AMPA_Receptors,L1CAM_interactions,Neuronal_System,Neurotransmitter_Receptor_Binding_And_Downstream,NrCAM_interactions,Trafficking_of_AMPA_receptors,Transmission_across_Chemical_Synapses
Grip1	-1.02031	0.165338	-4.27252	0.00479539	Glutamate_Binding_Activation_of_AMPA_Receptors,Neuronal_System,Neurotransmitter_Receptor_Binding_And_Downstream,Trafficking_of_AMPA_receptors,Transmission_across_Chemical_Synapses
S1pr1	-0.983164	3.6292	-6.31803	0.00062875	NA
Epb4.1l3	-0.937072	3.46352	-7.31249	0.000277882	NA
Ndn	-0.881474	1.72556	-7.38426	0.000262907	NA
Ntn1	-0.863206	6.74063	-6.54731	0.000516427	Axon_guidance
Pls3	-0.814721	6.44807	-8.64439	0.000106234	NA
Enah	-0.786624	7.81568	-6.19213	0.000702142	Axon_guidance
Rab13	-0.685524	1.25539	-3.72552	0.00910858	NA
Gli2	-0.6568	4.97356	-4.78848	0.00272712	NA
E130012A19Rik	-0.628936	6.76755	-5.98736	0.000843347	NA
Zfp280c	-0.608554	4.86108	-10.3304	3.72477e-05	NA
Adcy1	-0.607304	3.46399	-6.87804	0.000392421	Neuronal_System,Neurotransmitter_Receptor_Binding_And_Downstream,Transmission_across_Chemical_Synapses
Siah2	-0.59408	1.60621	-4.79123	0.0027192	Axon_guidance
Epha7	-0.588491	2.39613	-5.65372	0.00114838	Axon_guidance
Top2b	-0.584768	6.25389	-5.01474	0.00215456	NA

## Sheet: All in Elmsan1 KO vs WT
Gene	log2FC	AveExpr	T.Value	P.Value
0610005C13Rik	-0.0841001	0.535849	-0.207182	0.842237
0610007C21Rik	0.375913	4.73622	1.3879	0.211084
0610007L01Rik	-0.0345842	6.92997	-0.542754	0.605481
0610007N19Rik	0.330518	2.42259	1.25365	0.253371
0610007P08Rik	0.136548	5.50304	2.04847	0.0830132
0610007P14Rik	-0.00318643	5.2739	-0.0528072	0.959479
0610007P22Rik	-0.0134424	4.61062	-0.133607	0.897773
0610009B22Rik	0.0466117	4.23976	0.442257	0.672708
0610009D07Rik	-0.0562613	5.53695	-1.03754	0.336699
0610009O20Rik	0.124807	5.48457	0.777775	0.464188
0610010F05Rik	-0.137011	4.90409	-0.598116	0.570097
0610010O12Rik	-0.0906153	3.42993	-0.414626	0.691816
0610011F06Rik	0.0238555	3.31463	0.0804687	0.938297
0610011L14Rik	-0.186123	5.3535	-1.9546	0.0949343
0610012G03Rik	0.0365806	4.54279	0.442496	0.672543
0610030E20Rik	0.57683	4.5806	4.14913	0.0051068
0610031J06Rik	-0.296481	5.97989	-5.19869	0.00160226
0610037L13Rik	0.0525875	4.96137	0.49011	0.640235
0610037P05Rik	0.0691976	4.77352	0.837533	0.43214
0610043K17Rik	-0.593612	0.155355	-1.78537	0.120859
0910001L09Rik	-0.165536	4.22034	-1.34143	0.224954
1110001A16Rik	0.0610128	4.90273	0.253374	0.80784
1110001J03Rik	0.340015	4.12261	2.68803	0.0335974
1110002B05Rik	-0.175362	5.05282	-1.02937	0.340246
1110002J07Rik	-0.142206	0.535066	-0.348578	0.738472
1110002L01Rik	0.097534	3.57545	0.876168	0.412286
1110002N22Rik	-0.0971503	4.60237	-1.07046	0.322714
1110003E01Rik	-0.216588	4.74833	-1.937	0.0973519
1110004E09Rik	-0.065206	4.13875	-0.804839	0.449473
1110004F10Rik	-0.152549	6.60192	-1.74355	0.128262
1110005A03Rik	-0.140021	4.13588	-1.06817	0.323673
1110007C09Rik	0.120012	2.07753	0.297389	0.77549
1110008F13Rik	-0.090808	5.91127	-1.04477	0.333586
1110008J03Rik	0.179846	3.4222	1.77134	0.123296
1110008L16Rik	-0.146728	5.36618	-2.0273	0.0855638
1110008P14Rik	-0.0824062	2.87997	-0.651359	0.537254
1110012J17Rik	-0.398667	6.11154	-4.5032	0.00339345
1110012L19Rik	0.0915371	4.18551	0.945222	0.378497
1110014N23Rik	-0.0146368	4.42723	-0.147712	0.887067
1110018G07Rik	0.0706277	5.6984	1.05365	0.329795
1110018J18Rik	-0.041309	4.23883	-0.121229	0.907188
1110019D14Rik	0.202489	2.85801	1.80173	0.118077
1110020G09Rik	-0.116688	6.73947	-1.49991	0.180767
1110021J02Rik	0.202694	2.86449	0.928736	0.386366
1110021L09Rik	-0.0917155	3.25486	-0.523325	0.618186
1110028C15Rik	0.0831554	2.196	0.568513	0.588865
1110031I02Rik	0.0998991	3.12653	0.631954	0.549086
1110032A03Rik	-0.250858	1.47888	-1.05223	0.330398
1110032F04Rik	-0.281079	0.187457	-0.954113	0.374305
1110034A24Rik	0.135166	4.68124	1.27818	0.245129
1110034B05Rik	-0.292928	4.10631	-3.88117	0.00704568
1110034G24Rik	0.124128	2.75533	0.916025	0.392519
1110037F02Rik	0.161194	6.82903	2.06612	0.0809446
1110038B12Rik	0.00941299	6.71234	0.0678232	0.947974
1110038D17Rik	0.0716509	4.34893	0.766366	0.47049
1110038F14Rik	-0.110507	4.19625	-1.4548	0.192463
1110049F12Rik	0.0499383	5.46444	0.727958	0.492137
1110051M20Rik	-0.437509	3.45546	-1.47972	0.18592
1110054O05Rik	0.0165887	5.59546	0.116127	0.911073
1110057K04Rik	-0.27956	5.06808	-4.36798	0.00395802
1110058L19Rik	0.195914	3.25873	1.21533	0.266722
1110059E24Rik	-0.0840296	5.42029	-0.828356	0.436956
1110059G10Rik	-0.102865	3.11654	-0.964004	0.369682
1110065P20Rik	0.11248	2.94441	0.768876	0.469099
1110067D22Rik	-0.138907	5.20073	-1.67998	0.140359
1190002H23Rik	0.809036	2.70842	2.87857	0.0258406
1190002N15Rik	-0.325778	5.14278	-5.3046	0.00143751
1190003J15Rik	-0.0332264	2.40702	-0.271754	0.794277
1190005F20Rik	-0.157537	4.75161	-1.91026	0.101143
1190005I06Rik	0.16959	1.71455	0.417255	0.689987
1190007F08Rik	0.0314505	0.225752	0.119178	0.90875
1190007I07Rik	0.203242	3.52889	1.36515	0.217775
1200011I18Rik	-0.0733399	5.98846	-1.02971	0.340098
1200011M11Rik	-0.0997449	5.42011	-1.17739	0.280531
1200014J11Rik	0.063539	6.6436	0.769107	0.468971
1200016B10Rik	-0.363563	6.34603	-6.50524	0.000462178
1300001I01Rik	0.0607146	7.53419	0.585157	0.578269
1300002E11Rik	0.0850413	3.49289	0.540864	0.606711
1300002K09Rik	1.01137	0.927588	2.17045	0.0697375
1300010F03Rik	0.0458063	5.03987	0.162788	0.875652
1300014I06Rik	1.47978	-0.719672	1.95042	0.095503
1300018I17Rik	0.448171	3.52639	4.30313	0.00426528
1300018J18Rik	0.825262	2.2777	1.61362	0.154145
1500001M20Rik	0.149692	6.01196	1.70059	0.136323
1500002O20Rik	0.358448	5.49506	4.99125	0.00199021
1500003O03Rik	-0.277092	5.20263	-2.90602	0.0248903
1500009L16Rik	-0.444616	2.39499	-1.69211	0.137969
1500010J02Rik	0.0264815	6.8519	0.238806	0.818643
1500011B03Rik	0.0334944	2.79036	0.195068	0.851323
1500011H22Rik	-0.255144	4.18905	-1.41082	0.204526
1500011K16Rik	0.137187	2.92019	0.709892	0.502546
1500012F01Rik	0.108821	6.62948	1.4993	0.180921
1500031L02Rik	-0.124714	4.38188	-1.34176	0.224851
1500032L24Rik	-0.133885	5.27723	-1.82512	0.114207
1520401A03Rik	1.82888	-0.0477059	5.45669	0.00123323
1520402A15Rik	-0.436513	1.72503	-1.40734	0.205512
1600002H07Rik	0.214564	4.93506	3.15127	0.0178889
1600002K03Rik	-0.43079	2.20085	-2.07432	0.0800014
1600012F09Rik	0.436354	5.11774	4.81409	0.00240623
1600012H06Rik	0.0335623	4.57602	0.366374	0.725772
1600014C10Rik	0.142932	2.57974	1.0828	0.317595
1600016N20Rik	0.669123	2.35415	2.25146	0.062132
1600020E01Rik	0.341047	4.11045	1.51133	0.177913
1600021P15Rik	0.0228503	4.49752	0.191038	0.854351
1600027N09Rik	0.173822	4.72828	2.16475	0.0703074
1600029D21Rik	0.465616	4.05358	2.75742	0.0305193
1700001L05Rik	0.219535	3.98644	2.33453	0.0552112
1700001P01Rik	-0.526502	0.355276	-1.17241	0.282389
1700003M02Rik	-3.03165	-0.820437	-5.38589	0.00132395
1700007K13Rik	-0.272665	3.14338	-2.11762	0.0752018
1700007L15Rik	0.34141	1.30033	0.611591	0.561673
1700008O03Rik	-0.588432	0.584982	-2.30469	0.0576012
1700010I14Rik	-0.618822	0.381503	-3.2043	0.0166738
1700011J10Rik	0.714074	1.46089	1.63602	0.149353
1700012A16Rik	1.08762	0.727215	2.43777	0.0477043
1700012B15Rik	0.0709337	2.61046	0.585108	0.5783
1700017B05Rik	0.333427	5.11187	3.65685	0.0093023
1700019D03Rik	-0.0431465	6.52779	-0.248866	0.811178
1700019E19Rik	-0.359935	2.75764	-2.78599	0.0293403
1700019G17Rik	-0.0070309	0.985974	-0.0161976	0.987565
1700020I14Rik	-0.0364807	6.98649	-0.747618	0.480974
1700020O03Rik	-0.19698	4.22391	-2.4338	0.0479723
1700021C14Rik	-0.120227	0.938579	-0.620933	0.555877
1700021F05Rik	0.0117252	4.20724	0.129469	0.900919
1700021K19Rik	0.215924	4.21189	2.6358	0.0361297
1700023L04Rik	0.817312	1.08629	3.08396	0.0195706
1700024B05Rik	-2.14739	0.370246	-6.95501	0.000314609
1700025G04Rik	0.302183	3.31595	2.79031	0.0291661
1700025K23Rik	0.609621	0.781096	1.0716	0.322238
1700029F09Rik	-0.171664	4.27376	-1.4762	0.186831
1700029G01Rik	-0.200309	2.67233	-0.640046	0.544132
1700029I01Rik	-0.130098	6.49965	-1.08788	0.315506
1700029P11Rik	0.537262	1.90293	1.03613	0.337308
1700030C10Rik	-0.694723	2.72798	-2.20873	0.0660319
1700030J22Rik	-0.026696	1.39072	-0.122421	0.906281
1700030K09Rik	0.497923	3.72784	2.65169	0.0353385
1700034H14Rik	-1.14426	3.22057	-7.87068	0.000152335
1700037H04Rik	-0.0560259	4.75057	-0.468299	0.654935
1700040I03Rik	0.40355	3.99899	4.46261	0.00355288
1700042O10Rik	-0.361679	1.1104	-1.11137	0.305996
1700047I17Rik2	-0.256629	2.49077	-0.985175	0.359938
1700048O20Rik	-3.4408	-1.89389	-5.74398	0.000930542
1700049G17Rik	0.220163	2.67642	1.1328	0.297529
1700052N19Rik	0.0847665	5.78514	1.32686	0.229467
1700054N08Rik	0.241942	3.5728	2.1242	0.0744976
1700061G19Rik	0.284002	6.27364	2.45986	0.0462403
1700066B19Rik	0.697478	0.333741	1.34022	0.225326
1700066M21Rik	0.0779788	4.52511	0.754133	0.477313
1700067K01Rik	0.702957	0.429898	1.48144	0.185475
1700081L11Rik	-0.0371547	6.42798	-0.65671	0.53402
1700086O06Rik	0.158937	0.201104	0.709649	0.502687
1700086P04Rik	1.22114	-0.227341	2.67519	0.0342019
1700094D03Rik	0.00663103	1.80992	0.0428829	0.967088
1700101E01Rik	0.0814861	-0.132135	0.260759	0.802382
1700102P08Rik	-0.0663407	0.632704	-0.306888	0.768569
1700106N22Rik	-0.0962071	2.35764	-0.630025	0.550271
1700109H08Rik	0.222062	0.262294	0.732357	0.489624
1700113A16Rik	0.0686184	-0.166631	0.215165	0.836262
1700123O20Rik	-0.0784119	4.78543	-0.509236	0.627488
1810006K21Rik	0.0504	5.73574	0.962238	0.370504
1810008A18Rik	-0.100134	5.01759	-0.839021	0.431363
1810009A15Rik	-0.114666	6.03809	-1.95387	0.0950335
1810012P15Rik	0.282513	2.42233	0.958731	0.372141
1810013D10Rik	0.330642	3.93659	3.3538	0.0137043
1810013L24Rik	0.0920305	6.24079	1.48077	0.185649
1810014B01Rik	-0.296191	1.53033	-1.39579	0.208805
1810014F10Rik	0.3163	3.17317	0.9943	0.3558
1810019D21Rik	1.19016	1.25751	4.54772	0.00322769
1810019J16Rik	0.82865	2.66376	4.09842	0.00542299
1810020D17Rik	-0.278998	3.23024	-1.44725	0.194488
1810022K09Rik	-0.121666	5.64382	-1.61056	0.15481
1810024B03Rik	-0.0394679	0.897131	-0.221491	0.831538
1810026J23Rik	-0.12176	5.10212	-1.42584	0.200331
1810027O10Rik	-0.0332477	5.36739	-0.20562	0.843407
1810029B16Rik	0.21113	5.57238	1.40474	0.206249
1810030N24Rik	0.17929	2.83029	0.766504	0.470414
1810030O07Rik	-0.0376973	5.43163	-0.61499	0.55956
1810031K17Rik	0.14062	3.07787	0.271893	0.794175
1810032O08Rik	-0.0557906	4.82264	-0.495687	0.636504
1810035L17Rik	-0.323429	5.40724	-5.42461	0.00127344
1810037I17Rik	-0.137012	6.21911	-1.94265	0.0965697
1810043G02Rik	0.0509765	3.44667	0.422446	0.686382
1810043H04Rik	0.00733686	2.81299	0.047535	0.963521
1810046J19Rik	-0.227985	4.15514	-2.79154	0.0291167
1810048J11Rik	0.125206	4.26741	0.859992	0.420516
1810049H13Rik	-0.15144	0.900893	-0.321464	0.757993
1810055G02Rik	-0.0448645	4.78162	-0.643275	0.542163
1810058I24Rik	0.4238	5.43395	5.86629	0.0008279
1810063B05Rik	0.214009	3.73537	1.92945	0.0984084
1810063B07Rik	0.385884	1.80458	1.36179	0.21878
1810074P20Rik	0.0140879	5.29212	0.108777	0.916676
2010001M06Rik	0.908598	0.995178	1.84325	0.111293
2010002N04Rik	-0.456674	1.29266	-3.07966	0.0196837
2010003O02Rik	-0.0128775	0.738109	-0.066547	0.948952
2010011I20Rik	0.0310455	3.10531	0.141764	0.891579
2010012O05Rik	-0.509764	1.46891	-2.1657	0.0702122
2010012P19Rik	-0.245561	-0.137928	-0.558333	0.5954
2010015L04Rik	-0.549587	2.36204	-3.52843	0.0109437
2010015M23Rik	0.171615	0.517964	0.732259	0.48968
2010106G01Rik	-0.0160807	5.23712	-0.206255	0.842931
2010107E04Rik	-0.00809224	6.36813	-0.0766973	0.941182
2010107G12Rik	-0.631317	1.50937	-1.4344	0.197978
2010107G23Rik	0.847691	2.44845	2.46047	0.0462003
2010107H07Rik	0.106903	1.9343	0.61418	0.560063
2010109K11Rik	-0.450766	2.49485	-4.14319	0.00514274
2010111I01Rik	0.134074	5.40148	2.0741	0.080026
2010204K13Rik	0.311127	2.79773	2.8047	0.0285944
2010305A19Rik	-0.157497	5.04532	-1.5075	0.178865
2010317E24Rik	0.042179	4.69436	0.458556	0.661557
2010321M09Rik	-0.0422003	5.3839	-0.706909	0.504279
2210009G21Rik	0.00551202	4.20238	0.0478615	0.96327
2210010C17Rik	1.20142	0.761339	2.98544	0.0223461
2210011C24Rik	1.15596	1.63332	5.09672	0.00178118
2210012G02Rik	0.154612	2.9463	0.990634	0.357457
2210013O21Rik	-0.118514	3.52597	-0.759277	0.474436
2210015D19Rik	0.361345	3.91605	3.68657	0.00896209
2210016F16Rik	0.0785758	3.96016	0.612166	0.561315
2210016L21Rik	-0.165963	5.01628	-2.50024	0.0436833
2210018M11Rik	0.0165072	5.25435	0.193054	0.852837
2210021J22Rik	0.595384	3.94221	2.12068	0.0748736
2210403K04Rik	-0.233721	1.10034	-0.883234	0.408729
2210404J11Rik	-0.51545	4.30048	-2.93177	0.024033
2210404O09Rik	-0.358862	3.06558	-1.77495	0.122664
2210408I21Rik	-0.335755	2.27906	-2.15632	0.0711579
2210409E12Rik	-2.59006	1.04674	-9.94321	3.72117e-05
2210411K11Rik	-0.350645	1.52356	-1.30838	0.235304
2210418O10Rik	-0.316932	5.10669	-1.28062	0.244322
2300002M23Rik	-0.23699	5.0798	-0.948103	0.377135
2300009A05Rik	0.36976	1.19792	1.49356	0.182373
2310001A20Rik	-0.046559	4.45132	-0.490543	0.639946
2310002J15Rik	0.439064	0.552533	2.18312	0.0684885
2310003C23Rik	-0.0261018	5.72091	-0.159376	0.878233
2310003F16Rik	-0.144861	1.54696	-0.695722	0.510811
2310003H01Rik	0.318794	4.664	2.91358	0.0246355
2310003L06Rik	-0.493384	0.817286	-0.722803	0.495092
2310003L22Rik	-0.0990257	4.14175	-0.544754	0.604181
2310004I24Rik	-0.133164	3.69727	-1.45349	0.192814
2310004N24Rik	-0.244363	3.04578	-1.7593	0.125424
2310008H04Rik	-0.0341089	5.5823	-0.452133	0.66594
2310008H09Rik	-0.368871	7.4034	-2.0242	0.0859439
2310009B15Rik	-0.150616	0.538909	-0.668048	0.527207
2310010G23Rik	0.0965638	1.21808	0.545134	0.603935
2310011J03Rik	-0.0765058	4.54837	-0.669912	0.526092
2310014L17Rik	-0.714568	1.82896	-3.49958	0.0113544
2310015A10Rik	0.902371	1.6268	4.24909	0.00454165
2310016M24Rik	0.328637	4.26442	2.17172	0.0696113
2310021P13Rik	-0.106795	4.47208	-0.453016	0.665337
2310022A10Rik	0.196526	4.43585	2.51662	0.0426891
2310022B05Rik	0.26009	4.50853	2.37518	0.0521192
2310028H24Rik	-0.150656	0.665487	-0.621155	0.55574
2310030G06Rik	0.0788141	2.18035	0.34217	0.743067
2310030N02Rik	-0.0356461	3.88069	-0.311471	0.765238
2310033P09Rik	-0.183261	3.40018	-1.50641	0.179137
2310035C23Rik	-0.141259	5.82523	-0.897073	0.401828
2310035K24Rik	0.265652	2.22718	1.34646	0.223414
2310036O22Rik	0.228278	6.33156	1.50698	0.178996
2310037I24Rik	-0.137092	6.76426	-1.83124	0.113215
2310039H08Rik	0.344712	2.6146	1.38224	0.21273
2310043M15Rik	-0.573027	5.78228	-3.59979	0.00999574
2310044G17Rik	-0.182637	5.01884	-1.69231	0.13793
2310044H10Rik	0.245485	6.80625	4.69279	0.00274711
2310045N01Rik	0.231919	4.25978	1.85951	0.108742
2310046O06Rik	0.331599	4.68086	1.97519	0.0921815
2310047B19Rik	0.0757304	3.77254	0.523121	0.618319
2310047M10Rik	-0.0888553	2.4497	-0.356508	0.732802
2310057M21Rik	-0.0698551	3.63871	-0.748864	0.480273
2310058D17Rik	-0.163627	0.729574	-0.492201	0.638835
2310061C15Rik	0.417465	4.18945	5.17017	0.00165019
2310061I04Rik	0.167868	3.51411	0.871978	0.414406
2310067B10Rik	0.204337	5.52659	0.917239	0.391928
2310079F23Rik	-0.586964	5.49572	-5.20011	0.00159992
2400001E08Rik	0.0336999	6.3114	0.331304	0.750886
2400003C14Rik	0.291569	7.07839	3.50281	0.0113076
2400009B08Rik	-0.200096	0.471048	-0.455977	0.663315
2410001C21Rik	-0.0646741	5.94273	-0.505118	0.630221
2410002F23Rik	-0.0380968	6.9758	-0.634364	0.547608
2410002I01Rik	0.172058	4.50863	2.00346	0.0885295
2410002O22Rik	-0.216886	6.26408	-2.17658	0.0691306
2410003K15Rik	0.290222	4.40049	1.86488	0.107912
2410003L11Rik	-0.281733	4.31614	-3.49764	0.0113827
2410004A20Rik	0.671012	4.96462	0.47942	0.647419
2410004B18Rik	-0.178872	4.18185	-1.05025	0.331243
2410004N09Rik	-0.0981143	4.66821	-1.09428	0.312893
2410006H16Rik	0.720732	7.48924	2.83858	0.0272944
2410012M07Rik	-0.265191	1.03154	-1.22185	0.264408
2410015M20Rik	-0.333936	4.96563	-4.27527	0.00440537
2410016O06Rik	-0.172712	4.93308	-1.60109	0.156886
2410017I17Rik	0.313836	2.23916	0.911394	0.394778
2410017P09Rik	-0.200911	2.98304	-1.09651	0.311987
2410018L13Rik	0.233711	3.73468	1.93495	0.0976376
2410018M08Rik	-0.131292	5.59593	-1.155	0.288962
2410019O14Rik	-0.245915	2.76174	-1.56085	0.166009
2410022L05Rik	0.168409	5.34233	2.72305	0.0320046
2410042D21Rik	-0.140601	5.33018	-1.21052	0.26844
2410066E13Rik	-0.425356	2.09495	-2.27667	0.0599426
2410075B13Rik	0.431504	3.21011	2.96537	0.0229616
2410076I21Rik	-0.38253	3.02935	-1.10329	0.30924
2410089E03Rik	0.522098	6.16151	6.59173	0.000428553
2410091C18Rik	0.0326602	4.40674	0.209089	0.840808
2410124H12Rik	0.51409	0.353459	1.95011	0.095545
2410127L17Rik	-0.318656	6.25898	-3.33888	0.0139731
2410131K14Rik	-0.0157898	5.47652	-0.239878	0.817847
2410137F16Rik	0.627326	4.18709	1.32686	0.229467
2410137M14Rik	-0.532204	2.80312	-4.44899	0.00360823
2410141K09Rik	0.0275763	4.72976	0.214721	0.836595
2500002B13Rik	0.417128	4.22063	2.80597	0.0285443
2500003M10Rik	0.0187505	7.84914	0.366033	0.726014
2500004C02Rik	0.178552	1.64419	1.00325	0.351777
2510002D24Rik	0.114839	3.76542	1.24255	0.257176
2510003E04Rik	-0.0634242	4.74381	-0.955768	0.373528
2510006D16Rik	0.079731	6.07871	1.38713	0.211307
2510009E07Rik	-0.0486398	0.708556	-0.219001	0.833397
2510012J08Rik	-0.0648152	5.63572	-0.309227	0.766868
2510039O18Rik	-0.132309	6.06694	-2.57231	0.0394807
2610001J05Rik	0.325705	4.56976	2.8442	0.027085
2610002D18Rik	-0.119649	4.65582	-0.475419	0.650118
2610002I17Rik	-0.190418	3.90894	-1.61909	0.152962
2610002J02Rik	0.206679	4.13755	1.28618	0.242493
2610002M06Rik	-0.508377	2.59368	-3.19988	0.0167716
2610005L07Rik	0.467078	7.2581	3.53366	0.0108709
2610008E11Rik	-0.354709	3.8035	-3.732	0.00846828
2610015P09Rik	-0.031998	3.68205	-0.166977	0.872486
2610018G03Rik	-0.0708474	3.75331	-0.476489	0.649396
2610019E17Rik	-0.237194	3.54681	-1.9882	0.0904829
2610019F03Rik	-0.794866	5.93198	-12.8175	7.72598e-06
2610020C07Rik	0.108862	0.432077	0.505221	0.630153
2610020H08Rik	-0.113556	2.89484	-0.431021	0.680448
2610021A01Rik	-0.213981	6.26515	-2.1467	0.072142
2610021K21Rik	-0.129289	2.71513	-0.665594	0.528677
2610027L16Rik	0.0410816	6.19445	0.537109	0.609157
2610029G23Rik	-0.094561	5.95657	-1.47075	0.188251
2610029I01Rik	-0.0980574	3.12023	-0.295434	0.776917
2610034B18Rik	-0.0195736	2.02333	-0.131796	0.89915
2610035D17Rik	0.46982	2.13592	1.25983	0.251271
2610037D02Rik	0.341126	3.31393	2.62833	0.0365076
2610039C10Rik	6.22781e-05	4.65234	0.00071204	0.999453
2610101N10Rik	-0.200148	8.22859	-1.61409	0.154042
2610301B20Rik	-0.321468	3.67183	-2.21142	0.0657793
2610301G19Rik	-0.0597011	5.8859	-1.10425	0.308856
2610305D13Rik	-0.0487796	7.45254	-0.479893	0.647101
2610318N02Rik	0.0806764	4.79641	0.510351	0.626749
2610507B11Rik	0.278489	8.75368	5.26991	0.00148928
2610507I01Rik	-0.149006	0.579165	-0.699642	0.508516
2610524H06Rik	-0.0066906	4.64325	-0.0499314	0.961683
2610528B01Rik	0.350478	1.13427	2.04142	0.083853
2610528E23Rik	-0.129036	3.25754	-1.00106	0.352757
2610528J11Rik	1.55762	1.28903	8.18598	0.000120599
2700007P21Rik	0.034015	6.03741	0.482403	0.645411
2700016F22Rik	0.846244	-0.392162	1.89676	0.103112
2700023E23Rik	-0.392564	3.92211	-3.93892	0.00656748
2700029M09Rik	0.612291	5.61739	7.39656	0.000219746
2700038G22Rik	-0.23889	2.76986	-1.57313	0.163173
2700046G09Rik	0.0802677	1.02674	0.222013	0.831148
2700049A03Rik	0.211011	5.94814	1.56437	0.165192
2700050L05Rik	0.159063	6.31374	2.63708	0.0360651
2700060E02Rik	-0.190854	7.36269	-3.01915	0.0213514
2700062C07Rik	-0.0140577	3.97975	-0.129208	0.901118
2700073G19Rik	-0.259882	1.94641	-1.19487	0.274095
2700078E11Rik	-0.159532	6.94437	-1.82686	0.113924
2700081O15Rik	-0.0597459	5.42113	-0.29135	0.779901
2700089E24Rik	0.212988	5.14609	2.58174	0.0389632
2700094K13Rik	-0.034379	7.39068	-0.562702	0.59259
2700097O09Rik	0.0157386	4.52347	0.182433	0.860827
2810001G20Rik	-0.0476914	1.60187	-0.296758	0.77595
2810002D19Rik	0.111796	1.65664	0.449739	0.667578
2810002N01Rik	0.62441	4.7987	4.7986	0.00244699
2810004N23Rik	0.480787	6.58052	9.22522	5.87484e-05
2810006K23Rik	0.332998	4.12049	3.19725	0.0168301
2810008D09Rik	-0.000250294	4.03426	-0.000769465	0.999409
2810008M24Rik	-0.0555632	5.82175	-0.633132	0.548363
2810011L19Rik	0.470658	2.2427	2.68573	0.0337047
2810021B07Rik	0.278423	4.34266	3.26971	0.0152965
2810021J22Rik	-0.102947	3.75955	-1.03634	0.337218
2810025M15Rik	-0.0183667	5.85593	-0.229287	0.825724
2810030E01Rik	0.269968	3.06111	2.1963	0.0672129
2810046L04Rik	0.0761906	3.24411	0.587095	0.577042
2810055F11Rik	0.465074	1.28069	1.67645	0.141062
2810403A07Rik	-0.00990853	6.30859	-0.128515	0.901645
2810403D21Rik	-0.404676	2.21893	-2.42341	0.0486818
2810405K02Rik	0.181581	3.05586	1.27148	0.247356
2810407C02Rik	-0.101971	7.23148	-1.30811	0.235392
2810408A11Rik	0.837578	3.13873	3.58347	0.0102043
2810408I11Rik	0.118935	2.07744	0.850178	0.425567
2810408M09Rik	-0.258244	3.65941	-2.77468	0.029801
2810410L24Rik	0.208853	1.36956	0.792305	0.456246
2810417H13Rik	-0.751815	5.52922	-4.02305	0.00593369
2810422J05Rik	0.476626	5.58793	5.92989	0.000779626
2810422O20Rik	-0.182887	3.39154	-1.43295	0.198375
2810428I15Rik	0.440305	4.7653	2.89404	0.0253005
2810429I04Rik	-0.153471	2.97864	-1.12917	0.298949
2810432D09Rik	0.117735	4.76304	1.03412	0.338181
2810442I21Rik	-0.760888	0.352779	-3.37871	0.0132678
2810453I06Rik	0.194967	4.40604	1.89239	0.103757
2810455O05Rik	0.049268	0.0492857	0.224665	0.829169
2810474O19Rik	0.272698	7.46878	1.71908	0.132794
2900005J15Rik	-0.521133	-0.0899377	-1.12571	0.30031
2900010M23Rik	0.236088	5.49519	3.9201	0.00671926
2900011O08Rik	-0.480223	3.46112	-1.94394	0.0963919
2900026A02Rik	0.117637	3.97804	1.27016	0.247799
2900041M22Rik	0.958196	0.98593	2.98097	0.0224814
2900052L18Rik	0.126636	2.43736	0.353951	0.734628
2900053A13Rik	0.535247	4.48048	3.41291	0.0126931
2900056M20Rik	-0.00719562	-0.258864	-0.0205676	0.98421
2900064A13Rik	-0.0155969	4.9834	-0.146035	0.888339
2900076A07Rik	0.215884	1.99579	0.726441	0.493005
2900092E17Rik	0.195785	3.37102	1.7433	0.128308
2900097C17Rik	-0.210896	3.42113	-1.00957	0.34896
3000002C10Rik	-0.138416	1.34171	-0.823653	0.439439
3010026O09Rik	0.0764667	3.43713	0.288253	0.782167
3110001D03Rik	-0.0810852	4.45962	-0.856498	0.422309
3110001I22Rik	-0.434031	3.02145	-1.4997	0.180821
3110002H16Rik	-0.346987	6.75283	-2.63391	0.0362246
3110003A17Rik	-0.775116	3.68644	-7.13553	0.000271094
3110007F17Rik	0.31099	1.46303	1.50681	0.179036
3110009E18Rik	-0.596275	0.667014	-2.74416	0.0310834
3110040N11Rik	0.391709	3.50748	2.42195	0.0487822
3110043O21Rik	-0.11206	4.28076	-1.0578	0.328034
3110047P20Rik	-2.47151	-1.35091	-8.74395	8.12185e-05
3110052M02Rik	-0.146549	0.639333	-0.622797	0.554724
3110053B16Rik	0.0790064	2.60968	0.652021	0.536853
3110056K07Rik	-0.147279	1.43689	-0.708575	0.50331
3110056O03Rik	-0.131202	4.39477	-1.01328	0.347313
3110057O12Rik	-0.339729	1.58474	-1.9632	0.0937743
3110062M04Rik	0.667536	2.97771	2.76838	0.0300613
3110082I17Rik	-0.126312	4.36102	-1.54152	0.170565
3200002M19Rik	0.0166857	5.60996	0.249255	0.81089
3222401L13Rik	0.218318	2.57814	1.62486	0.151721
3230401D17Rik	-0.120515	4.95049	-0.861662	0.419661
3300002I08Rik	0.0445385	1.72003	0.235289	0.821257
3632451O06Rik	-1.06156	4.12881	-3.16344	0.0176018
3830406C13Rik	-0.345401	1.63076	-1.47965	0.185937
3830431G21Rik	-0.347275	1.82293	-0.639735	0.544322
4631405K08Rik	1.21778	0.155584	1.7443	0.128126
4632404H12Rik	0.520943	1.46921	1.96783	0.0931555
4632411B12Rik	-0.0592012	6.05146	-1.12546	0.300408
4632415K11Rik	0.707234	3.85713	2.90771	0.0248331
4632415L05Rik	0.34314	2.19887	2.3088	0.0572659
4632419I22Rik	0.0582086	5.02461	0.680812	0.519603
4632427E13Rik	0.0643205	4.03063	0.377464	0.717904
4632434I11Rik	0.0337296	6.03176	0.53826	0.608407
4732418C07Rik	-0.0782219	5.08713	-1.09037	0.314487
4732444A12Rik	-1.24611	1.36061	-6.81256	0.000354596
4732471D19Rik	0.469754	2.71742	3.06258	0.0201397
4831426I19Rik	1.08882	1.45177	2.59467	0.0382645
4833407H14Rik	0.960393	1.19417	4.30771	0.00424275
4833417C18Rik	-0.0856467	1.51758	-0.35717	0.732329
4833420G17Rik	-0.144273	5.48192	-1.94308	0.0965103
4833439L19Rik	0.0645775	6.67686	0.719523	0.496979
4833442J19Rik	0.287586	2.54705	1.43136	0.198811
4921513D23Rik	0.132173	6.15131	2.12666	0.0742368
4921517L17Rik	0.160406	0.428436	0.567316	0.589631
4921524J17Rik	0.0777095	4.29339	0.83348	0.434262
4922501C03Rik	0.0959496	5.09966	1.33002	0.228481
4930402H24Rik	0.130851	4.46302	1.08043	0.318575
4930420K17Rik	0.00183671	3.43407	0.0169887	0.986958
4930422G04Rik	0.134406	5.26161	2.23301	0.0637866
4930427A07Rik	0.0846101	5.68309	0.629567	0.550552
4930429B21Rik	-0.2288	1.21322	-1.40375	0.206531
4930430F08Rik	0.115521	3.80424	0.745944	0.481918
4930432K21Rik	1.15547	2.16625	4.77052	0.00252289
4930443B20Rik	-0.0869106	3.33961	-0.465537	0.656809
4930444A02Rik	0.392599	5.62483	2.17852	0.0689389
4930447C04Rik	-0.130527	2.20811	-0.486585	0.6426
4930452B06Rik	0.0944514	2.49113	0.293958	0.777995
4930453N24Rik	-0.106337	6.03523	-0.706448	0.504547
4930455C21Rik	0.297389	4.16579	1.23099	0.261193
4930455F23Rik	0.0359888	2.60148	0.113814	0.912836
4930461G14Rik	0.60827	2.71912	1.72418	0.131838
4930471M23Rik	0.239842	5.00633	3.37946	0.0132549
4930473A06Rik	0.171416	3.29285	1.60044	0.157031
4930480K23Rik	0.157911	0.733079	0.591685	0.574144
4930481B07Rik	0.167373	-0.0613466	0.379652	0.716356
4930500J02Rik	-1.60154	3.80575	-4.34836	0.00404827
4930502E18Rik	-1.78917	1.03176	-9.8542	3.93153e-05
4930503L19Rik	-0.243981	4.60165	-2.4557	0.0465122
4930506M07Rik	0.14894	1.45684	0.622751	0.554753
4930513N10Rik	0.115415	1.18127	0.567792	0.589326
4930518I15Rik	0.0933322	-0.106795	0.363317	0.727947
4930519F16Rik	-0.0431174	3.81625	-0.167907	0.871784
4930520O04Rik	0.366943	-0.136628	0.869003	0.415917
4930522L14Rik	-0.349346	4.19702	-2.99468	0.0220686
4930526A20Rik	0.149765	0.29709	0.592485	0.573639
4930526L06Rik	-1.63553	-0.722302	-5.50512	0.0011752
4930534B04Rik	-0.100945	4.6009	-1.3893	0.210675
4930539E08Rik	0.499616	3.45923	5.06492	0.00184149
4930547N16Rik	0.0401275	4.90509	0.522418	0.618782
4930550L24Rik	-1.49627	-0.0770035	-6.58764	0.000430079
4930556M19Rik	0.716702	1.39481	1.79551	0.119127
4930558J18Rik	0.23149	2.08925	0.968151	0.367758
4930563E22Rik	0.656801	-0.201312	0.996975	0.354594
4930566F21Rik	0.148757	4.6101	1.73428	0.129961
4930572J05Rik	0.519062	2.44766	1.33455	0.227074
4930578N16Rik	0.037639	0.187131	0.134873	0.896811
4930579G24Rik	0.0427662	4.64349	0.408192	0.696302
4930581F22Rik	0.00881763	1.2455	0.0293783	0.977448
4930583H14Rik	-0.357674	1.69738	-0.557551	0.595904
4931406C07Rik	0.00867656	2.24159	0.0275443	0.978856
4931406P16Rik	-0.168005	6.09028	-1.4637	0.190103
4931414P19Rik	0.373246	2.72165	3.11503	0.0187739
4931428F04Rik	0.283602	3.12218	2.59763	0.0381068
4931440P22Rik	-0.0470744	0.282147	-0.231459	0.824107
4932415G12Rik	0.503088	0.436651	1.48332	0.184991
4932425I24Rik	-0.141709	-0.436001	-0.292017	0.779413
4932438A13Rik	0.32339	6.21133	2.11323	0.0756743
4933403F05Rik	0.0502777	6.05106	0.526194	0.6163
4933403G14Rik	0.758753	3.99462	3.84175	0.00739411
4933404O12Rik	0.361124	1.55314	0.801894	0.451058
4933407C03Rik	0.504523	4.54784	4.90975	0.00217065
4933407H18Rik	-0.00596393	2.34806	-0.0319274	0.975492
4933407K13Rik	-0.0366377	2.94124	-0.274681	0.792124
4933411K20Rik	0.450571	4.81319	2.50633	0.0433107
4933415A04Rik	0.195929	-0.0409077	0.510648	0.626552
4933421E11Rik	-0.250844	3.50824	-2.38515	0.0513889
4933424B01Rik	0.371537	7.10757	3.35734	0.0136414
4933426M11Rik	0.116111	5.58516	1.78186	0.121465
4933427D06Rik	-1.34486	-0.0894914	-4.33686	0.00410227
4933427D14Rik	0.0808614	4.2312	0.983339	0.360775
4933431E20Rik	0.422296	0.761734	1.30724	0.235669
4933433G15Rik	0.576993	-0.0445715	0.842386	0.429609
4933433P14Rik	0.0462444	2.55103	0.198562	0.8487
4933434E20Rik	-0.193123	4.97172	-2.32252	0.0561607
4933436C20Rik	0.0184767	1.0951	0.0602973	0.953739
4933437F05Rik	-0.103285	1.7794	-0.484907	0.643727
4933439C10Rik	0.152106	1.304	0.863302	0.418822
4933439F18Rik	0.0390632	6.34989	0.773106	0.46676
4933440M02Rik	1.24944	-0.515157	2.55116	0.0406683
5031425E22Rik	0.0149369	2.61454	0.108689	0.916742
5031439G07Rik	-0.111156	5.08096	-1.79674	0.118919
5033414D02Rik	0.124521	3.0656	0.624215	0.553849
5133400J02Rik	-0.406606	1.05808	-1.95844	0.094414
5133401N09Rik	0.300454	3.11491	1.04644	0.332872
5330426P16Rik	0.902385	0.00851672	1.89119	0.103935
5330438D12Rik	0.201296	0.415612	0.513638	0.624574
5430403G16Rik	-0.297412	4.4921	-2.00212	0.0886994
5430405H02Rik	-0.0365353	1.02162	-0.185437	0.858565
5430407P10Rik	-0.262298	0.0879287	-0.950171	0.376159
5430411K18Rik	0.246358	4.9757	2.65527	0.0351625
5430416N02Rik	0.201961	4.93077	1.8614	0.108449
5430417L22Rik	-0.145981	1.10936	-0.474035	0.651053
5430437P03Rik	0.42841	5.78226	7.14063	0.000269967
5530601H04Rik	-0.120593	3.16531	-1.21831	0.265664
5730403B10Rik	0.162284	5.6681	2.8793	0.0258147
5730405O15Rik	0.0679026	0.995108	0.186973	0.857409
5730409E04Rik	0.388015	1.93209	1.59407	0.158443
5730419I09Rik	0.887652	6.67447	16.9062	1.34953e-06
5730437N04Rik	0.0992704	4.53475	1.01038	0.348598
5730455O13Rik	-0.215055	3.54123	-1.25283	0.25365
5730455P16Rik	0.0700113	4.4922	0.342359	0.742932
5730469M10Rik	-0.832104	4.81608	-3.09452	0.019296
5730494M16Rik	0.0692323	4.41939	0.803158	0.450377
5730494N06Rik	0.0483766	4.1245	0.260038	0.802915
5730507C01Rik	0.078432	4.31315	0.494923	0.637015
5730508B09Rik	0.0962767	0.463373	0.438541	0.675263
5730528L13Rik	-0.0987714	4.84056	-0.343217	0.742316
5730559C18Rik	0.632843	3.54079	4.39524	0.00383628
5730590G19Rik	-0.199295	6.47195	-0.813627	0.444766
5830415F09Rik	-0.0163962	4.14987	-0.105387	0.919261
5830416P10Rik	1.73682	0.675338	2.54204	0.0411921
5830417I10Rik	0.193912	5.97901	2.86366	0.0263726
5830418K08Rik	0.0733738	6.57176	1.46299	0.190289
5830418P13Rik	0.393247	-0.642385	0.505483	0.629979
5830428H23Rik	-0.0189418	2.31305	-0.127702	0.902263
5830433M19Rik	-0.372276	4.15148	-3.52797	0.0109501
5830444B04Rik	-0.420399	0.0855926	-1.67625	0.141101
5830454E08Rik	0.684928	-0.254232	1.74076	0.128771
5930412G12Rik	0.135336	1.12847	0.763128	0.47229
5930416I19Rik	0.330223	5.31886	5.10657	0.00176296
5930434B04Rik	-0.0670563	2.61975	-0.395794	0.704983
5S_rRNA	0.027331	0.714563	0.110827	0.915113
6030419C18Rik	-1.08242	0.625659	-4.91983	0.00214737
6030422M02Rik	-0.319542	1.84145	-1.89318	0.10364
6030429G01Rik	-0.354141	2.65805	-1.17973	0.279663
6030442K20Rik	0.275845	0.0364595	1.28622	0.242479
6030446N20Rik	0.0731925	3.12972	0.210612	0.839668
6030455H03Rik	0.655854	1.44694	2.53515	0.0415923
6030458C11Rik	-0.0145775	6.54477	-0.298395	0.774756
6230409E13Rik	0.105825	0.622552	0.505678	0.629849
6230427J02Rik	0.754515	0.43242	0.941019	0.380492
6330403K07Rik	-0.546095	0.0594898	-1.30114	0.237627
6330403L08Rik	0.0591266	1.65013	0.316275	0.761752
6330407J23Rik	-0.159266	0.818977	-0.318682	0.760008
6330408A02Rik	0.191914	2.65638	0.837551	0.432131
6330409N04Rik	0.0546987	3.7498	0.356429	0.732858
6330416G13Rik	0.910809	4.4947	2.50293	0.0435185
6330418K02Rik	0.153819	0.243013	0.648521	0.538974
6330439K17Rik	-0.944223	-0.220583	-3.8579	0.00724917
6330503K22Rik	-0.133321	6.07157	-2.47735	0.0451141
6330545A04Rik	0.324983	0.147002	1.43091	0.198934
6330549D23Rik	0.0773507	0.958178	0.251655	0.809113
6330578E17Rik	0.103364	6.64622	1.72612	0.131476
6430527G18Rik	-0.643719	6.14842	-7.43083	0.000213866
6430573F11Rik	0.742064	0.759704	1.29044	0.241097
6430598A04Rik	0.710104	2.57806	3.804	0.0077457
6430704M03Rik	-2.08236	2.25514	-12.4627	9.2071e-06
6530401N04Rik	0.194305	4.48043	1.14948	0.291071
6530418L21Rik	-0.674625	1.11443	-2.98522	0.0223527
6720401G13Rik	-0.0225381	4.50601	-0.119373	0.908602
6720456B07Rik	0.572935	6.78821	10.4159	2.79872e-05
6720456H20Rik	0.249589	3.0312	1.04856	0.331964
6720463M24Rik	0.0516352	5.67411	0.745249	0.48231
6720489N17Rik	-0.405274	0.670499	-1.80146	0.118122
6820431F20Rik	0.50238	6.61647	3.79356	0.00784612
7SK	-0.161695	13.9979	-1.51769	0.176342
8030462N17Rik	-0.0907774	6.14773	-1.16503	0.28516
8030474K03Rik	0.287907	0.492091	0.726566	0.492934
8430406I07Rik	0.140002	5.44087	1.63708	0.149129
8430410A17Rik	0.104359	6.70844	0.401341	0.701092
8430410K20Rik	-0.162294	6.02507	-2.65716	0.0350702
8430419L09Rik	0.976191	3.72692	2.4463	0.0471328
8430427H17Rik	0.272854	3.14343	1.62874	0.150895
9030025P20Rik	-0.0399114	2.47573	-0.158072	0.87922
9030418K01Rik	-0.992227	0.635426	-3.94459	0.00652253
9030425E11Rik	-0.500732	2.61074	-1.02129	0.34378
9030617O03Rik	-1.41792	2.89987	-14.2173	4.03239e-06
9030624G23Rik	-0.338087	2.21541	-2.60036	0.0379616
9030624J02Rik	-0.322311	6.37001	-5.13524	0.00171108
9030625A04Rik	-0.433853	1.55661	-1.31143	0.234334
9130011E15Rik	0.239468	4.46329	3.01901	0.0213555
9130011J15Rik	0.339176	6.34319	5.57699	0.00109469
9130017N09Rik	0.843393	2.85109	1.63581	0.149398
9130019O22Rik	0.0579936	2.96237	0.379798	0.716253
9130020K20Rik	0.506963	0.0610682	1.74073	0.128777
9130023H24Rik	0.446749	2.18952	3.07182	0.0198915
9130221H12Rik	0.0599582	3.00369	0.469046	0.65443
9130401M01Rik	-0.0176823	5.28376	-0.237415	0.819677
9230110C19Rik	-0.213927	0.808099	-0.521699	0.619255
9230112E08Rik	0.0137849	0.87929	0.0638297	0.951033
9230114K14Rik	0.222461	1.81713	0.788043	0.458566
9230116N13Rik	0.536318	-0.00618443	1.56239	0.165651
9330020H09Rik	0.375757	0.766191	1.27	0.247851
9330104G04Rik	0.292692	-0.0112383	0.529135	0.614371
9330133O14Rik	0.891746	1.90966	2.30896	0.0572534
9330151L19Rik	0.353603	1.50028	0.696267	0.510492
9330159M07Rik	-0.649054	0.970557	-2.91055	0.0247372
9330182L06Rik	0.166481	1.01101	0.362691	0.728392
9330185C12Rik	0.0453941	0.887131	0.183136	0.860297
9430008C03Rik	0.130822	5.60128	1.25242	0.253788
9430015G10Rik	0.150903	5.0806	1.04001	0.335633
9430016H08Rik	-0.234184	4.57257	-2.81886	0.0280431
9430020K01Rik	-0.208553	3.68361	-0.565442	0.590832
9430023L20Rik	-0.223857	4.98121	-1.36434	0.218015
9430037G07Rik	0.0335253	0.823269	0.128007	0.902031
9430038I01Rik	-0.00365728	3.22372	-0.0273249	0.979024
9530008L14Rik	0.720788	0.479757	0.837025	0.432406
9530068E07Rik	-0.268852	5.32939	-4.80382	0.00243316
9530077C05Rik	-0.0433619	0.786955	-0.194838	0.851496
9530082P21Rik	0.763755	-0.0817117	1.33835	0.2259
9630033F20Rik	0.199746	7.12478	1.64785	0.14688
9830001H06Rik	0.361852	3.74001	1.27766	0.245302
9830144P21Rik	-0.0291124	0.618015	-0.0582007	0.955345
9830147E19Rik	-0.115662	5.67566	-1.14	0.294726
9930012K11Rik	0.29732	1.35381	1.64105	0.148296
9930013L23Rik	-0.684724	0.947432	-1.46913	0.188675
9930014A18Rik	0.897552	1.15092	4.21992	0.00469904
9930021J03Rik	0.0290598	5.13543	0.341987	0.743199
9930104L06Rik	-0.0628694	4.47545	-0.72769	0.49229
A030009H04Rik	-0.163391	2.31658	-0.515988	0.623021
A130010J15Rik	0.272045	3.54685	2.33864	0.0548908
A130022J15Rik	0.68841	5.5298	9.10476	6.36196e-05
A230046K03Rik	-0.135054	7.46415	-1.94857	0.0957552
A230050P20Rik	0.300794	3.27538	1.8436	0.111237
A230051G13Rik	0.167395	3.26503	0.770786	0.468042
A230072C01Rik	-0.184519	1.11112	-0.767294	0.469975
A2ld1	0.166844	3.26523	1.21032	0.268512
A2m	-1.67122	3.12387	-6.64378	0.000409659
A330021E22Rik	-0.655924	-0.299532	-1.91547	0.100393
A330023F24Rik	-0.585344	0.00736579	-2.30685	0.0574247
A330035P11Rik	-0.0530702	0.54849	-0.21558	0.835953
A330049M08Rik	0.107735	1.85685	0.560172	0.594217
A330069E16Rik	0.396944	-0.578133	0.787239	0.459004
A430005L14Rik	0.200494	4.86157	2.40231	0.0501559
A430033K04Rik	-0.513758	3.81366	-4.88232	0.00223543
A430046D13Rik	0.40386	0.429374	0.859371	0.420834
A430057M04Rik	-0.116928	0.275045	-0.483371	0.644759
A430104N18Rik	0.319784	1.89352	1.09001	0.314637
A4galt	0.655986	6.59945	6.49932	0.000464587
A530017D24Rik	0.184745	2.70132	1.51178	0.177801
A530054K11Rik	0.00198413	5.76751	0.0286781	0.977986
A630007B06Rik	0.138241	5.20929	1.91302	0.100745
A630052C17Rik	0.206126	1.57146	0.864347	0.418288
A630055G03Rik	0.414059	3.16085	4.02662	0.00590832
A730011L01Rik	0.0980916	3.23171	0.714599	0.49982
A730036I17Rik	0.181384	0.775563	0.769984	0.468485
A730049H05Rik	-0.831394	2.36769	-1.78851	0.120321
A730085A09Rik	-0.748543	1.44112	-1.64359	0.147766
A830007P12Rik	0.615903	3.52717	3.16305	0.0176109
A830010M20Rik	0.161074	2.05563	0.353242	0.735135
A830018L16Rik	-0.418048	3.65189	-4.74839	0.00258458
A830080D01Rik	-0.155217	6.40309	-2.67793	0.0340718
A930001C03Rik	0.909612	0.26663	1.52446	0.174681
A930001N09Rik	-0.100855	4.69981	-1.28901	0.241564
A930004D18Rik	-0.0975868	1.55934	-0.484268	0.644156
A930011O12Rik	-0.705445	2.0076	-3.76754	0.00810275
A930015D03Rik	0.162776	0.333701	0.564	0.591757
A930024E05Rik	0.204251	-0.0488147	0.789321	0.457869
AA386476	0.831876	1.29335	3.61111	0.00985376
AA414768	-0.880041	0.658739	-2.82031	0.0279874
AA467197	-0.743649	3.23453	-2.34448	0.0544376
AA960436	0.707294	4.00074	4.88637	0.00222574
AA986860	0.251782	2.08099	0.273033	0.793336
AA987161	0.0124806	5.8553	0.184704	0.859117
AC027184.1	0.240664	12.5715	0.914659	0.393184
AC099934.1	-0.244744	13.371	-0.799008	0.452615
AC120136.1	-0.18898	0.874271	-0.678122	0.5212
AC120136.2	-0.00948623	-0.298938	-0.0250979	0.980733
AC120136.3	-0.460892	5.53393	-0.83541	0.433251
AC125484.1	-0.586613	1.27097	-3.67237	0.00912292
AC134325.1	-0.52919	1.02661	-2.86842	0.0262015
AC147142.1	0.32186	0.755743	1.63885	0.148758
AC150277.1	-0.517505	1.03153	-2.2863	0.0591267
AC156953.1	-0.139194	4.82672	-0.305444	0.769619
AC157822.1	-0.26908	13.4948	-0.862002	0.419487
AC158898.1	-1.27863	-0.00495366	-4.44249	0.003635
AC161763.1	-0.586366	2.21582	-3.90353	0.00685613
AC175035.1	0.17964	4.62817	1.67221	0.14191
AI314180	-0.172177	5.56051	-2.56193	0.0400589
AI314976	0.420144	6.26923	7.2622	0.000244643
AI316807	0.682278	2.75184	1.73814	0.129252
AI413582	0.546424	3.00139	1.51271	0.17757
AI427809	0.874697	-0.161199	1.99072	0.0901564
AI428936	0.0839592	3.7454	0.616166	0.55883
AI462493	-0.334688	4.05419	-4.08403	0.0055166
AI464131	0.451275	5.55421	2.63826	0.0360059
AI467606	0.0525919	3.5871	0.494319	0.637419
AI480526	-0.188981	2.29758	-1.15032	0.290752
AI480653	-0.0262135	4.97914	-0.173084	0.867875
AI481877	0.802479	-0.098567	1.14803	0.291628
AI597468	-0.0220993	5.37752	-0.250034	0.810313
AI597479	0.120278	5.47237	1.52587	0.174337
AI606181	-0.230555	1.61808	-0.474408	0.650801
AI661453	0.740542	1.49632	4.22145	0.00469066
AI662270	-2.23638	4.3709	-9.70439	4.31711e-05
AI837181	0.0553158	4.4354	0.566889	0.589904
AI846148	-0.143667	5.1737	-0.884919	0.407884
AI848100	-0.0108299	6.26731	-0.155855	0.880898
AI854703	0.714282	1.20356	1.42405	0.200827
AI987944	-0.0258544	3.29484	-0.155262	0.881347
AK129341	-0.951348	2.22935	-7.40963	0.000217482
AK157302	-0.0165476	2.18748	-0.106738	0.918231
AL591712.1	-0.269451	3.3002	-1.26691	0.248887
AL645948.1	0.247811	-0.0630548	0.803964	0.449943
AL646020.1	0.131299	1.812	0.63144	0.549402
AL672228.1	-0.297761	-0.150198	-0.586986	0.577112
AU015836	0.260115	0.948513	0.794313	0.455156
AU018091	-0.0797699	5.85404	-1.38444	0.212087
AU019823	-0.0975278	5.30062	-1.46703	0.189227
AU022252	-0.121443	5.5129	-2.01232	0.0874157
AU040320	0.214003	3.94466	0.605378	0.565548
AU041133	0.0203987	2.09566	0.102649	0.92135
AV099323	0.0558279	0.0600019	0.174689	0.866664
AW146020	0.572745	5.10036	5.32062	0.00141429
AW146154	-0.0377381	2.64032	-0.276594	0.790718
AW209491	-0.0315673	3.74589	-0.291978	0.779442
AW549877	-0.0585824	6.43652	-0.563552	0.592044
AW551984	-1.35414	-0.405805	-6.23839	0.000586371
AW554918	0.0394123	3.75263	0.262805	0.800872
AW555464	0.861942	5.72084	4.00139	0.00609013
AY036118	-9.61094	6.30496	-8.51049	9.55693e-05
Aaas	-0.0068355	6.43512	-0.101678	0.922091
Aacs	-0.0297321	5.81372	-0.277701	0.789905
Aagab	0.0831561	5.65304	1.24231	0.25726
Aak1	0.567316	3.12371	5.03695	0.00189643
Aamp	-0.0988521	7.24884	-1.22017	0.265004
Aard	-1.0511	0.66713	-3.84042	0.0074062
Aars	0.543523	9.55238	5.83979	0.000849001
Aars2	0.0367439	5.87905	0.491755	0.639134
Aarsd1	-0.054928	5.90206	-0.547969	0.602096
Aasdh	0.569307	4.20003	1.82444	0.114319
Aasdhppt	-0.0428406	6.24862	-0.693521	0.512103
Aatf	-0.105258	5.94589	-0.769498	0.468754
Abat	-1.09637	0.412446	-2.11574	0.0754032
Abca1	0.855442	5.23479	3.2625	0.0154421
Abca2	0.104584	4.18784	0.383899	0.713356
Abca3	0.538812	4.00516	1.09791	0.311417
Abca5	0.0838965	2.17823	0.277401	0.790125
Abca7	0.748161	5.80461	5.82408	0.000861802
Abca8b	0.701461	0.460272	2.41833	0.0490323
Abcb10	0.395216	5.06573	4.36674	0.00396367
Abcb1a	-0.440241	4.44303	-5.68507	0.000985042
Abcb1b	-0.511736	5.34503	-2.23156	0.0639181
Abcb6	0.112412	5.66921	0.734031	0.48867
Abcb7	-0.356384	6.87972	-6.65782	0.000404727
Abcb8	0.0331285	5.55387	0.456733	0.662799
Abcc1	0.216785	6.69267	1.59223	0.158854
Abcc10	0.359224	3.16009	1.04064	0.335362
Abcc2	-2.62153	-0.764378	-7.85984	0.000153585
Abcc4	0.00820956	6.58646	0.114033	0.912669
Abcc5	0.0935353	7.03271	1.59423	0.158408
Abcc6	1.41424	-0.879728	1.90157	0.102406
Abcc8	0.0157841	1.03621	0.0511128	0.960778
Abcd1	0.34485	2.94032	2.76166	0.0303414
Abcd3	-0.169218	5.98844	-2.08618	0.0786567
Abcd4	0.803425	5.84565	2.24135	0.0630333
Abce1	0.197962	9.44493	2.5485	0.0408206
Abcf1	-0.0257905	7.66065	-0.507033	0.62895
Abcf2	-0.0536886	7.57433	-0.574177	0.585246
Abcf3	-0.165967	5.69845	-2.70377	0.0328716
Abcg1	0.768136	5.75557	7.15799	0.000266174
Abcg2	0.135721	6.13562	0.99598	0.355042
Abhd1	-0.0914981	0.928335	-0.327987	0.753279
Abhd10	-0.00722547	4.8197	-0.0822342	0.936946
Abhd11	0.456748	5.16236	6.52124	0.00045574
Abhd12	0.0312324	5.30304	0.186607	0.857684
Abhd13	0.369671	5.91109	6.3026	0.000553347
Abhd14a	0.0191449	4.51936	0.168728	0.871163
Abhd14b	0.402011	1.49523	2.41187	0.049482
Abhd16a	-0.306847	4.22615	-2.94603	0.0235719
Abhd2	0.297725	6.57882	5.26833	0.00149168
Abhd4	0.0108082	5.29541	0.0668791	0.948697
Abhd5	-0.378976	2.87754	-2.69537	0.0332565
Abhd6	-0.449793	2.23493	-2.1266	0.0742428
Abhd8	0.568619	3.99521	3.85821	0.00724636
Abi1	-0.0869687	6.00642	-1.51929	0.175947
Abi2	-0.0153597	6.33247	-0.247432	0.812241
Abi3	0.103837	0.748933	0.455565	0.663597
Abl1	0.00907361	6.43926	0.0652345	0.949957
Abl2	0.103013	6.9011	0.735012	0.488112
Ablim1	0.49488	6.52624	9.7668	4.15145e-05
Ablim2	0.903864	3.88751	2.24352	0.0628385
Abr	0.277376	6.07374	1.92684	0.0987752
Abt1	0.168591	4.88226	2.03274	0.0849005
Abtb1	0.0709469	5.1845	0.712817	0.500851
Abtb2	-0.656164	1.76679	-3.3572	0.0136437
Acaa1a	-0.048878	5.68053	-0.552691	0.59904
Acaa1b	-0.0111099	1.27614	-0.0511498	0.960749
Acaa2	0.0929011	4.45722	1.02082	0.343987
Acaca	0.111551	6.68921	0.826299	0.438041
Acacb	-1.05544	5.79038	-4.58692	0.00308916
Acad10	0.629156	2.64242	1.52117	0.175486
Acad11	0.245364	4.82455	2.79465	0.0289924
Acad12	0.205887	1.6072	0.631854	0.549147
Acad8	0.0207647	4.78071	0.193244	0.852694
Acad9	-0.101256	5.97982	-1.75221	0.126693
Acadl	0.38053	4.26822	1.25764	0.252015
Acadm	-0.179159	6.7623	-1.83388	0.11279
Acads	0.308891	5.77565	3.82508	0.00754719
Acadsb	-0.158455	4.93712	-1.32296	0.230688
Acadvl	-0.532531	3.72242	-2.39084	0.0509766
Acap1	0.334668	3.50972	0.875536	0.412605
Acap2	-0.0708782	5.99034	-1.20055	0.272031
Acap3	-0.0111257	4.08365	-0.0579001	0.955576
Acat1	-0.0995383	4.25943	-0.367839	0.724731
Acat2	-0.238334	6.77538	-2.84438	0.0270783
Acat3	-0.291658	3.37961	-2.33755	0.0549754
Acbd3	0.14885	5.47905	1.56349	0.165394
Acbd4	0.164121	3.80953	0.716159	0.498919
Acbd5	-0.08578	5.20957	-1.06556	0.324764
Acbd6	-0.232113	4.23478	-3.18531	0.0170983
Acbd7	-0.605222	-0.123138	-1.94331	0.0964784
Accn2	-0.0756837	1.11215	-0.370737	0.722672
Accs	-0.188653	2.39288	-1.63945	0.148632
Accsl	-1.9342	2.59063	-12.5945	8.62161e-06
Acd	0.380686	4.85826	5.60378	0.00106628
Ace	-0.402559	0.0749966	-1.01691	0.345709
Acer2	-0.237144	3.80635	-1.85929	0.108776
Acer3	-0.031447	3.90147	-0.125139	0.904212
Acin1	0.00544564	7.89091	0.0468134	0.964074
Acly	-0.0710988	9.29286	-0.669678	0.526231
Acn9	0.492428	3.44086	3.4002	0.0129035
Aco1	0.0686266	6.75876	1.35117	0.221981
Aco2	0.0776773	8.63929	0.578288	0.582629
Acot1	-0.725269	1.64822	-3.34802	0.0138077
Acot11	0.584314	0.433455	1.15446	0.289169
Acot13	0.734665	4.02849	2.51355	0.0428733
Acot2	0.0232048	1.80306	0.0647407	0.950335
Acot7	0.0405049	5.65948	0.550176	0.600666
Acot8	-0.0592253	4.01025	-0.463786	0.657999
Acot9	-0.14136	6.31173	-1.11637	0.304003
Acox1	-0.110108	5.4004	-1.1301	0.298583
Acox3	-0.759265	5.67475	-9.76504	4.15601e-05
Acoxl	0.164087	0.436389	0.404736	0.698717
Acp1	-0.0516021	6.7334	-0.945918	0.378168
Acp2	-0.492798	4.36492	-5.96685	0.000753044
Acp5	0.230199	1.1123	0.72358	0.494646
Acp6	-0.139182	4.53144	-0.629347	0.550688
Acpl2	0.279511	2.1505	0.960402	0.37136
Acpp	0.467861	3.43544	4.60475	0.00302836
Acrbp	0.86969	4.09492	1.82591	0.11408
Acsbg2	0.669091	1.47253	1.84576	0.110895
Acsf2	-0.971666	2.87319	-7.4201	0.000215688
Acsf3	0.367224	3.48215	2.15254	0.0715435
Acsl1	0.187407	5.62041	1.21715	0.266075
Acsl3	0.116894	6.94885	1.26357	0.25001
Acsl4	-0.0665984	4.62815	-0.836437	0.432713
Acsl5	0.349925	4.44911	1.61257	0.154372
Acsl6	0.0603347	3.11411	0.0895003	0.931391
Acss1	0.51895	6.47903	2.89525	0.0252586
Acss2	0.139122	3.77188	0.549696	0.600978
Actb	0.0448051	11.5961	0.333027	0.749643
Actg1	-0.254058	9.5625	-1.70033	0.136371
Actl6a	-0.198243	7.629	-2.16435	0.0703475
Actn1	0.153618	7.69611	2.20111	0.0667535
Actn3	-0.605238	0.229426	-2.19214	0.0676124
Actn4	0.230443	7.12752	2.04545	0.0833717
Actr10	-0.259984	5.59872	-3.76457	0.00813258
Actr1a	-0.123811	6.63162	-2.05019	0.0828094
Actr1b	0.141433	6.73833	1.91077	0.101069
Actr2	0.0762577	8.22808	1.00364	0.351602
Actr3	-0.0141751	7.75431	-0.246766	0.812735
Actr3b	-0.0821479	3.05944	-0.263999	0.799991
Actr5	0.0583186	3.769	0.33399	0.74895
Actr6	-0.121909	4.34912	-1.43369	0.198172
Actr8	0.052775	5.5955	0.797404	0.453482
Acvr1	-0.0895906	2.6199	-0.464147	0.657753
Acvr1b	0.607623	5.43358	5.30645	0.00143481
Acvr2a	-0.0746908	4.68337	-0.438919	0.675002
Acvr2b	0.250712	3.90953	2.35487	0.0536411
Acy1	-0.316416	5.20664	-3.35329	0.0137134
Acy3	0.640774	0.470027	1.52269	0.175115
Acyp1	-0.0723265	3.70043	-0.289605	0.781178
Acyp2	-0.79359	0.388106	-2.25775	0.0615784
Ada	0.503932	3.48424	2.45697	0.0464286
Adal	0.00976834	4.70961	0.127834	0.902162
Adam10	-0.177492	5.09344	-1.22643	0.262794
Adam11	-0.113322	1.20964	-0.340482	0.74428
Adam15	-0.0575052	4.93572	-0.28296	0.786045
Adam17	-0.0359458	6.1419	-0.626216	0.552615
Adam19	-0.334857	7.36358	-7.01567	0.000299156
Adam22	0.222889	4.08175	0.867123	0.416873
Adam23	0.341452	3.90466	1.14442	0.293018
Adam9	0.475115	5.55143	4.9482	0.00208334
Adamts1	-0.658283	0.592025	-1.27384	0.246569
Adamts10	0.601566	2.97425	1.76671	0.124111
Adamts13	-0.44887	0.521402	-1.39421	0.209259
Adamts14	0.642042	2.593	1.87948	0.105688
Adamts15	-1.34786	0.775036	-6.68282	0.000396108
Adamts17	-0.419879	-0.132031	-1.01648	0.345897
Adamts4	-0.157196	2.53139	-0.785198	0.460119
Adamts7	-0.0159329	1.55466	-0.0842781	0.935383
Adamts8	-1.46443	-0.104846	-5.89645	0.000804602
Adamts9	0.0726399	5.83124	0.762447	0.472669
Adamtsl1	0.96946	2.87353	3.61155	0.0098483
Adamtsl4	-0.774701	0.39568	-1.78983	0.120094
Adamtsl5	1.10634	1.23871	1.45052	0.193607
Adap1	-0.0451354	4.89562	-0.102545	0.92143
Adap2	0.107353	2.69654	0.524455	0.617443
Adar	0.11734	5.93371	2.10229	0.0768665
Adarb1	0.12057	2.99896	0.800946	0.451569
Adat1	0.232078	4.44777	2.24436	0.0627631
Adat2	-0.161721	3.70737	-1.13331	0.297327
Adat3	-0.102848	2.87907	-0.713715	0.500331
Adc	0.843053	3.68102	1.47981	0.185897
Adck1	-0.0831285	4.34697	-0.867507	0.416677
Adck2	0.65541	2.94213	1.72501	0.131682
Adck3	0.137697	2.80749	0.807158	0.448227
Adck4	-0.279142	3.40978	-1.0475	0.332419
Adck5	-0.0745323	3.93328	-0.893288	0.403706
Adcy1	-0.102167	3.80688	-0.290893	0.780235
Adcy3	0.574563	4.19037	1.1159	0.304189
Adcy6	0.701997	3.12228	4.59185	0.00307222
Adcy7	0.36909	-0.205724	1.43511	0.197782
Adcy9	-0.006893	1.62815	-0.0215246	0.983476
Add1	-0.0754284	6.57354	-1.27773	0.245278
Add3	-0.143153	6.00846	-2.61701	0.037089
Adh1	-0.555105	3.2455	-3.57721	0.0102855
Adh5	0.0288113	8.0604	0.526209	0.616291
Adh7	0.826651	-1.51194	0.533261	0.61167
Adhfe1	0.218151	3.00215	0.802958	0.450485
Adi1	0.0769135	5.04115	0.900074	0.400343
Adipor1	-0.114313	7.04164	-1.23413	0.2601
Adipor2	0.275805	8.38194	4.76489	0.00253844
Adk	-0.134358	5.67542	-2.02889	0.0853687
Adm2	1.60607	-0.0338112	1.60286	0.156496
Adnp	0.0528822	0.0662912	0.25522	0.806475
Adnp2	-0.108036	6.74537	-1.34574	0.223632
Ado	0.0278567	6.1322	0.469241	0.654297
Adpgk	0.169051	6.32752	1.21223	0.267828
Adprh	0.55292	6.30406	9.20179	5.96613e-05
Adprhl2	0.253798	5.75026	2.69113	0.0334527
Adrb2	0.13375	0.750157	0.37824	0.717356
Adrb3	0.664817	3.95504	2.89532	0.0252561
Adrbk1	-0.000588561	5.87113	-0.00857268	0.993418
Adrbk2	-1.26705	0.304393	-3.35943	0.0136043
Adrm1	-0.202671	6.23068	-2.00671	0.0881195
Adsl	0.0810791	7.08274	1.68937	0.138506
Adss	-0.134954	7.58268	-1.24884	0.255012
Adssl1	1.83343	2.61088	1.71344	0.133862
Aebp1	-0.0699523	1.36273	-0.336904	0.746853
Aebp2	0.149299	6.67211	0.713887	0.500232
Aen	-0.143963	6.37701	-1.82036	0.114985
Aes	0.395125	6.66995	3.93219	0.0066213
Afap1	0.114881	4.73185	1.23379	0.260218
Afap1l1	0.348796	1.66363	2.14491	0.0723274
Afap1l2	0.858951	2.21915	2.08982	0.0782486
Aff1	-0.331189	7.15201	-4.88992	0.00221726
Aff3	0.114809	1.43222	0.567969	0.589213
Aff4	-0.115213	7.77932	-1.14395	0.293198
Afg3l1	0.324278	6.3981	4.99376	0.00198493
Afg3l2	0.0162827	6.29944	0.260052	0.802904
Afmid	0.626428	0.848111	2.04681	0.0832104
Aftph	-0.0768128	5.65949	-1.15428	0.289236
Aga	0.808295	3.76651	1.59656	0.15789
Agap1	0.270841	5.63409	3.87581	0.00709201
Agap3	0.0966161	5.30873	1.00096	0.352802
Agbl5	0.0723992	3.47688	0.509964	0.627006
Agfg1	-0.0949043	6.86321	-0.638914	0.544824
Agfg2	0.185219	3.89027	1.57227	0.16337
Aggf1	-0.0518819	6.13897	-0.402736	0.700115
Agk	0.292667	6.30806	4.50864	0.00337267
Agl	-0.121357	4.79283	-1.04815	0.332139
Agpat1	-0.0753167	5.92128	-1.10368	0.309082
Agpat2	0.416332	4.69786	2.81782	0.0280832
Agpat3	0.529699	4.27554	2.97467	0.022674
Agpat4	0.21868	3.51803	0.517502	0.622021
Agpat5	0.169309	6.34239	2.84365	0.0271055
Agpat6	0.32455	6.55338	6.2317	0.000589939
Agpat9	0.016835	3.81295	0.18574	0.858337
Agphd1	-0.134852	2.62185	-0.735524	0.48782
Agps	0.172682	7.44484	3.24466	0.015809
Agrn	0.334849	7.34959	6.30063	0.000554332
Agtpbp1	-0.499245	4.30731	-6.47537	0.000474481
Agtrap	0.118191	7.01625	1.73428	0.129962
Agxt2l2	0.0925101	2.96146	0.40164	0.700883
Ahctf1	0.0708596	8.35165	0.777394	0.464397
Ahcy	-0.0607198	7.95136	-0.733245	0.489118
Ahcyl1	0.101282	6.25201	0.76147	0.473213
Ahcyl2	0.2026	5.51265	1.91824	0.0999973
Ahdc1	0.163703	6.08241	1.69565	0.137279
Ahi1	0.198708	3.55464	0.40084	0.701443
Ahnak	0.610775	8.46974	1.98408	0.0910172
Ahnak2	0.64979	6.01674	1.82659	0.113969
Ahr	-0.307118	4.11177	-3.15621	0.0177717
Ahrr	0.125629	2.55427	0.671104	0.525379
Ahsa1	-0.158294	8.15871	-2.28569	0.0591779
Ahsa2	-0.499342	4.83441	-4.91453	0.00215958
Ahsg	-1.1623	0.279349	-5.79467	0.000886354
Aida	-0.151793	4.36041	-1.93216	0.098028
Aif1l	-0.0602943	2.02637	-0.149715	0.885549
Aifm1	-0.0836592	6.17165	-1.47244	0.187811
Aifm2	0.404086	2.22088	0.93356	0.384051
Aifm3	0.485933	2.32875	2.26021	0.0613629
Aig1	0.457742	3.67605	0.869205	0.415814
Aim1l	1.0068	3.92309	7.48098	0.000205583
Aim2	-0.150649	6.50342	-1.71454	0.133654
Aimp1	-0.147634	6.06878	-1.49972	0.180817
Aimp2	-0.207569	5.38416	-1.58966	0.159429
Aip	-0.0207768	4.43696	-0.234079	0.822157
Aipl1	0.656065	-0.595065	0.708601	0.503295
Aire	-1.82778	-0.66915	-7.25497	0.000246071
Ak1	0.273544	6.31178	2.00896	0.0878367
Ak2	0.243428	7.55675	4.63346	0.00293326
Ak3	-0.274707	2.76341	-1.04069	0.335341
Ak3l2-ps	-0.351383	3.32882	-2.52193	0.0423715
Ak4	-0.456663	7.88135	-5.72648	0.000946366
Akap1	-0.155932	7.73226	-1.89607	0.103214
Akap10	0.0580681	5.32716	0.782913	0.461369
Akap11	0.204052	6.13342	2.32043	0.056328
Akap12	0.0419301	10.4883	0.730542	0.49066
Akap13	0.163303	5.54784	0.765219	0.471127
Akap17b	-0.235758	3.97705	-2.63542	0.0361485
Akap5	0.422398	2.16739	0.96473	0.369345
Akap7	0.2314	4.56805	1.35003	0.222328
Akap8	-0.140816	7.792	-0.821068	0.440808
Akap8l	-0.409774	4.94743	-3.1557	0.0177838
Akap9	0.147874	6.12407	1.00498	0.351004
Akirin1	-0.273939	5.786	-2.93974	0.0237742
Akirin2	-0.189364	5.96229	-2.09363	0.0778236
Akna	-0.0688969	3.55187	-0.711002	0.501903
Akr1a1	-0.00034257	7.91023	-0.00567519	0.995643
Akr1b10	-0.510137	2.06061	-2.08208	0.0791187
Akr1b3	0.150313	6.97613	1.36412	0.218083
Akr1b8	0.846557	1.61613	1.82889	0.113595
Akr1e1	-0.217093	3.32621	-0.749018	0.480186
Akr7a5	0.0501904	4.69738	0.335659	0.747748
Akt1	-0.0258292	5.72191	-0.186063	0.858094
Akt1s1	0.0473465	5.03063	0.329984	0.751838
Akt2	0.068291	6.06374	0.447434	0.669156
Akt2-ps	-0.323383	0.410758	-1.13841	0.295343
Akt3	-0.538194	4.19314	-1.55191	0.168101
Aktip	0.599428	5.62017	6.21096	0.000601156
Alad	0.235362	5.04269	2.38281	0.0515593
Alas1	0.151402	4.71518	2.10391	0.0766885
Alcam	-2.68384	1.28807	-18.5605	7.45721e-07
Aldh16a1	-0.0708686	5.79414	-0.675227	0.522922
Aldh18a1	0.495609	7.34114	3.24467	0.0158086
Aldh1a2	-0.708424	1.76213	-2.72759	0.0318044
Aldh1a3	0.214231	3.02961	0.573396	0.585744
Aldh1b1	0.454099	4.35638	4.52315	0.00331802
Aldh1l1	1.18745	6.04666	4.94791	0.00208397
Aldh1l2	-0.161182	2.10838	-1.07647	0.320214
Aldh2	-0.23406	7.01461	-3.37235	0.0133778
Aldh3a1	-1.17011	-0.296558	-2.03222	0.0849642
Aldh3a2	0.0185558	5.4429	0.14148	0.891794
Aldh4a1	0.275245	5.71157	1.81604	0.115695
Aldh5a1	0.84889	3.40853	1.78142	0.121541
Aldh6a1	-0.013705	4.88894	-0.038444	0.970493
Aldh7a1	0.174752	6.50642	2.49126	0.0442391
Aldh9a1	0.0384115	6.47003	0.620867	0.555918
Aldoa	-0.343617	9.79266	-4.897	0.00220049
Aldoc	-0.300243	3.75654	-2.82494	0.0278102
Alg1	0.100828	4.66021	1.08271	0.317633
Alg10b	0.194329	5.83491	3.23957	0.0159152
Alg11	0.203703	6.59826	3.62711	0.00965687
Alg12	0.0411576	3.59696	0.341244	0.743733
Alg13	-0.0467864	9.07174	-0.773139	0.466742
Alg14	0.031173	2.80664	0.259502	0.80331
Alg2	0.161055	4.69456	2.1757	0.0692167
Alg3	-0.0741486	3.99291	-0.286205	0.783667
Alg5	-0.0466621	4.56132	-0.381458	0.71508
Alg6	0.193455	5.33185	1.3573	0.220128
Alg8	0.215908	4.22441	0.914219	0.393398
Alg9	-0.0641369	4.68615	-0.684876	0.517197
Alkbh1	-0.0718679	5.62263	-0.689644	0.514384
Alkbh2	-0.0239132	3.72483	-0.163333	0.87524
Alkbh3	0.0665147	3.72832	0.461753	0.65938
Alkbh4	0.114207	3.86132	0.911574	0.39469
Alkbh5	-0.0172118	7.12862	-0.355645	0.733418
Alkbh6	-0.0146252	3.98449	-0.16595	0.873262
Alkbh7	-0.135571	3.62713	-1.45723	0.191817
Alkbh8	-0.0550342	5.01392	-0.47822	0.648228
Alms1	0.594936	7.04946	3.80766	0.00771084
Alms1-ps1	0.549838	0.707129	1.51093	0.178012
Alms1-ps2	0.560607	1.29069	1.80333	0.117808
Alox12	-0.213445	2.54626	-0.749444	0.479946
Aloxe3	0.188032	0.395072	0.265454	0.798918
Alpk3	0.00520884	3.83706	0.0569931	0.956271
Alpl	-0.214249	8.16709	-3.90807	0.00681837
Als2	0.193917	6.09218	3.0913	0.0193791
Als2cl	0.107395	3.50904	0.255625	0.806176
Als2cr4	-0.0446039	3.88209	-0.198112	0.849037
Alyref	-0.349604	7.5107	-1.87326	0.106629
Amacr	0.206054	3.90489	1.76023	0.125258
Ambra1	0.105046	6.00384	1.60268	0.156537
Amd-ps3	-0.227899	5.00908	-1.60353	0.156348
Amd-ps4	-0.307676	3.45672	-1.46618	0.189449
Amd1	-0.171012	7.49437	-1.26804	0.248506
Amd2	-0.131379	6.0524	-0.827345	0.437489
Amdhd2	0.258036	5.58617	1.83296	0.112939
Amfr	0.743258	5.32853	1.96943	0.0929434
Amhr2	-0.427967	2.4894	-0.745926	0.481928
Amigo1	0.370053	2.45726	2.95913	0.0231567
Amigo3	-0.299001	1.08983	-1.22303	0.263992
Ammecr1	0.0812143	5.04995	1.10948	0.306755
Ammecr1l	-0.0937768	4.69705	-1.01849	0.345013
Amn1	0.825371	2.97535	2.68388	0.0337913
Amot	0.0135347	2.71693	0.0935068	0.92833
Amotl1	-0.151159	4.96483	-0.828859	0.436691
Amotl2	0.447561	6.15668	3.41845	0.0126025
Ampd2	0.0411527	5.50283	0.595658	0.571642
Ampd3	1.34272	2.53321	1.99534	0.0895633
Amph	-0.0761358	2.97677	-0.379478	0.71648
Amt	-0.0298997	7.06291	-0.53006	0.613765
Amz1	0.390163	0.446246	0.749951	0.479661
Amz2	0.135951	5.27821	1.45914	0.19131
Anapc1	0.050073	7.88993	0.572678	0.586203
Anapc10	0.0523474	5.41285	0.820221	0.441257
Anapc11	-0.0317616	5.42822	-0.440237	0.674096
Anapc13	-0.0765861	3.67222	-0.771765	0.4675
Anapc16	-0.00661511	4.62703	-0.0438744	0.966328
Anapc2	-0.00991342	5.43672	-0.148293	0.886626
Anapc4	-0.0388646	6.32303	-0.539939	0.607313
Anapc5	-0.065489	8.3755	-1.06047	0.32691
Anapc7	0.0384697	6.46385	0.4537	0.66487
Angel1	0.317573	3.21987	0.912221	0.394374
Angel2	-0.0531532	5.35216	-0.584654	0.578587
Angptl2	-0.105913	1.45713	-0.628597	0.551149
Angptl4	0.124472	4.18076	1.50105	0.180482
Angptl6	0.456681	1.40589	1.20982	0.268691
Ank	-0.809729	2.59704	-2.43161	0.048121
Ank2	-0.234705	3.91573	-0.984906	0.36006
Ank3	0.67624	5.10521	1.96001	0.0942029
Ankfy1	0.080378	6.54948	1.11988	0.302612
Ankhd1	0.10023	7.20498	1.04025	0.335529
Ankib1	-0.034676	5.50259	-0.596909	0.570856
Ankle1	0.465442	4.55788	2.36284	0.0530385
Ankle2	-0.184711	6.73663	-3.64735	0.00941396
Ankmy2	0.0997065	5.44511	1.64589	0.147286
Ankra2	0.252371	3.90487	1.30112	0.237636
Ankrd10	0.156073	7.02601	0.691945	0.513029
Ankrd11	0.361445	8.30099	4.59322	0.00306754
Ankrd12	-0.167504	4.77952	-2.22562	0.0644614
Ankrd13a	-0.0301029	6.92938	-0.539783	0.607414
Ankrd13b	-0.0758876	1.81547	-0.413062	0.692905
Ankrd13c	-0.349803	5.82829	-2.9621	0.0230635
Ankrd13d	0.137953	2.26888	0.411036	0.694317
Ankrd16	-0.0120285	4.37452	-0.077483	0.940581
Ankrd17	-0.0351024	7.52731	-0.387977	0.71048
Ankrd23	0.24161	0.747244	0.880779	0.409962
Ankrd24	0.0111368	4.08207	0.0470048	0.963927
Ankrd26	0.483276	5.2046	7.18487	0.00026042
Ankrd27	0.0599397	6.00789	1.13106	0.298207
Ankrd28	0.0753332	6.25934	0.786586	0.459361
Ankrd32	-0.21285	5.12528	-2.67833	0.0340527
Ankrd33b	0.271842	2.2332	0.434942	0.677742
Ankrd35	-1.86959	4.85537	-25.2774	1.03591e-07
Ankrd37	-0.579008	1.63986	-2.83057	0.0275959
Ankrd39	-0.0316818	2.25118	-0.188522	0.856243
Ankrd40	-0.0524126	5.29667	-0.780395	0.462749
Ankrd42	-0.221522	0.825202	-1.25829	0.251793
Ankrd45	-0.905834	1.43311	-4.89131	0.00221396
Ankrd46	-0.0303324	4.78399	-0.320232	0.758885
Ankrd49	0.0911888	4.78161	0.847388	0.427011
Ankrd50	-0.0730788	5.04953	-0.413993	0.692257
Ankrd52	0.27079	4.52066	2.21143	0.0657781
Ankrd54	0.056487	4.5228	0.72418	0.494302
Ankrd6	-0.112011	4.98471	-0.780685	0.46259
Ankrd9	0.128056	3.80374	0.817607	0.442646
Anks1	0.144224	4.93245	1.33103	0.228165
Anks3	0.0937645	4.41857	1.10187	0.309815
Ankzf1	-0.290304	4.41424	-2.97349	0.0227102
Anln	-0.0229754	7.78131	-0.46103	0.659873
Ano1	-2.38519	0.966206	-6.01134	0.000722386
Ano10	1.23606	0.567642	1.18838	0.276472
Ano3	-1.65935	1.29618	-6.23931	0.000585883
Ano6	0.351462	5.57937	5.07919	0.00181414
Ano8	0.770901	3.99946	3.60111	0.00997897
Ano9	0.477385	6.12543	2.02912	0.0853413
Anp32a	-0.401466	8.09259	-4.2028	0.00479425
Anp32b	-0.298358	6.81376	-2.32865	0.0556741
Anp32b-ps1	-0.13323	1.92331	-0.785461	0.459975
Anp32e	-0.274306	7.25752	-4.03518	0.00584805
Antxr1	0.202898	2.94071	0.460733	0.660074
Anubl1	0.299076	2.20762	1.00736	0.349942
Anxa1	-1.24398	1.80072	-4.51878	0.00333437
Anxa11	-0.149299	5.08083	-2.24383	0.0628111
Anxa2	1.02082	1.84907	5.09251	0.00178903
Anxa4	0.746784	4.2758	2.40433	0.0500127
Anxa5	0.874775	4.12805	3.02747	0.0211135
Anxa6	0.231487	7.68168	1.94759	0.0958896
Anxa7	0.0113147	6.62045	0.137879	0.894528
Anxa8	0.673923	2.88073	1.08323	0.317418
Anxa9	0.556692	-0.0400181	1.9013	0.102445
Aoah	0.203592	3.15543	0.258085	0.804357
Aoc2	0.163064	1.36411	0.865833	0.41753
Aox1	-0.0210153	0.803627	-0.101665	0.922101
Aox3	-1.84486	0.869264	-1.76329	0.124715
Ap1ar	0.0527919	5.7519	0.700818	0.507829
Ap1b1	0.214807	6.26601	3.83482	0.00745734
Ap1g1	0.301017	6.92284	4.92988	0.00212442
Ap1g2	-0.128076	3.33021	-1.1965	0.273501
Ap1m1	0.140234	5.8444	1.25261	0.253725
Ap1m2	1.17998	5.89775	8.47635	9.79013e-05
Ap1s1	0.108371	4.88424	1.55453	0.167486
Ap1s2	-0.450096	4.54751	-4.41715	0.00374143
Ap1s3	-0.279058	1.04226	-1.42765	0.199832
Ap2a1	0.00216263	6.84472	0.0372126	0.971437
Ap2a2	0.129936	7.81088	2.28627	0.0591297
Ap2b1	0.0663263	7.40855	1.1476	0.291794
Ap2m1	0.0800912	7.37169	1.20945	0.268824
Ap2s1	0.0203611	5.51196	0.17056	0.86978
Ap3b1	0.0277077	7.37167	0.47838	0.64812
Ap3b2	0.278614	4.72976	0.813461	0.444855
Ap3d1	0.0879726	7.41847	1.63496	0.149577
Ap3m1	0.0484523	6.09242	0.815948	0.443529
Ap3m2	-0.0179158	3.11992	-0.094448	0.927611
Ap3s1	-0.161944	4.84333	-2.15141	0.0716585
Ap3s1-ps1	-0.131766	1.05304	-0.795134	0.454712
Ap3s1-ps2	0.0508614	1.43222	0.25691	0.805226
Ap3s2	-0.0604258	5.48267	-0.907726	0.396574
Ap4b1	-0.0283517	4.76923	-0.323391	0.756599
Ap4e1	0.031632	4.91681	0.405431	0.698231
Ap4m1	-0.0641696	4.98035	-0.7551	0.476771
Ap4s1	-0.37816	2.85351	-1.16498	0.28518
Apaf1	0.24656	6.45236	3.26052	0.0154823
Apba2	-1.67259	1.71027	-3.52629	0.0109735
Apba3	-0.032951	4.91487	-0.42957	0.68145
Apbb1	0.123744	4.06166	1.07988	0.318801
Apbb2	0.0622215	5.596	1.03523	0.3377
Apbb3	0.199013	3.94461	1.01596	0.346126
Apc	0.0560003	7.39685	0.57457	0.584996
Apc2	-0.266854	0.888302	-0.858912	0.421069
Apcdd1	-0.624684	2.52595	-4.86975	0.00226586
Apeh	-0.0480504	5.16089	-0.77053	0.468183
Apex1	-0.36597	7.88054	-3.0043	0.0217837
Apex2	-0.170306	4.29353	-0.971933	0.366009
Aph1a	0.117675	5.35401	1.76953	0.123612
Aph1b	0.383041	1.41301	0.53178	0.612639
Aph1c	0.16991	1.81117	0.236382	0.820444
Api5	-0.131042	7.84217	-1.52525	0.174489
Apip	-0.272625	3.90102	-3.31813	0.0143566
Apitd1	0.0168005	3.99813	0.0884363	0.932205
Aplf	0.541483	4.50269	5.97415	0.000747913
Aplp1	0.259133	3.94796	1.53388	0.172398
Aplp2	-0.0968766	8.50627	-0.82529	0.438574
Apoa1bp	0.0583037	4.81573	0.224721	0.829128
Apoa2	0.0980334	4.2707	0.860489	0.420261
Apobec1	0.396586	2.60246	0.693014	0.512401
Apobec2	0.857151	3.37021	5.11047	0.0017558
Apobec3	-0.204984	6.17852	-4.08086	0.00553744
Apobr	-0.0564543	1.4074	-0.264559	0.799578
Apoc1	0.70194	4.25709	1.77079	0.123392
Apoc2	-0.214471	0.21382	-0.599135	0.569457
Apod	-0.0159268	1.7114	-0.0476709	0.963416
Apoe	0.0846715	10.1291	0.764093	0.471753
Apol6	-0.583133	0.706743	-0.807419	0.448087
Apol7d	0.501097	0.778365	1.93838	0.0971599
Apold1	-0.972717	0.667684	-4.35733	0.00400672
Apoo	0.0241229	3.3967	0.204275	0.844415
Apoo-ps	-0.0333992	3.07117	-0.227479	0.827071
Apool	-0.196039	4.38467	-1.79909	0.118522
App	-0.385196	4.81839	-0.884126	0.408281
Appbp2	-0.235752	7.13325	-1.36066	0.219117
Appl1	0.121932	6.50532	2.25926	0.0614459
Appl2	-0.0698871	4.16485	-0.242877	0.81562
Aprt	0.287491	7.1945	4.73012	0.00263676
Aptx	0.129426	3.71781	1.31793	0.232271
Aqp11	0.723914	1.4757	1.86239	0.108296
Aqp3	0.333372	6.59914	1.1976	0.273102
Aqp8	0.179601	1.62336	0.199884	0.847708
Aqr	-0.0753841	7.26508	-0.890849	0.40492
Araf	-0.0200249	5.8889	-0.229145	0.82583
Arap1	-0.0148215	4.47304	-0.150949	0.884613
Arap2	0.197861	4.3479	0.935583	0.383083
Arc	0.593569	3.41763	3.01789	0.0213879
Arcn1	0.165854	8.50196	2.51322	0.0428932
Arf1	0.0878645	8.13234	1.38331	0.212416
Arf2	-0.0318836	4.80542	-0.391886	0.707729
Arf3	-0.0898894	6.41824	-0.736951	0.487009
Arf4	-0.062953	6.44341	-0.963197	0.370058
Arf5	0.496132	6.22058	4.23623	0.00461027
Arf6	-0.184408	7.5745	-2.42335	0.0486857
Arfgap1	-0.0864026	5.7264	-1.26312	0.250159
Arfgap2	-0.0628547	5.79091	-0.81026	0.446565
Arfgap3	0.547033	4.29836	3.66049	0.00925982
Arfgef1	-0.0873608	5.7452	-1.3714	0.215916
Arfgef2	0.299374	6.24189	4.31621	0.00420124
Arfip1	-0.12552	4.92355	-1.55272	0.167911
Arfip2	0.115782	5.34844	1.31423	0.233442
Arfrp1	-0.00329062	4.50668	-0.039769	0.969476
Arglu1	0.129339	6.65395	1.75274	0.126599
Arhgap1	0.0242989	6.29595	0.267808	0.797183
Arhgap10	0.354443	2.38675	0.779532	0.463223
Arhgap11a	-0.0390501	5.99864	-0.371341	0.722243
Arhgap12	0.0466497	6.53608	0.54309	0.605262
Arhgap17	-0.133523	5.52848	-1.89342	0.103604
Arhgap18	0.39474	1.42325	0.869247	0.415793
Arhgap19	0.0764914	6.5654	1.43835	0.196897
Arhgap20	-0.636358	0.211272	-1.74779	0.127492
Arhgap21	-0.0578271	6.24611	-0.957053	0.372926
Arhgap22	0.35595	0.596982	0.558909	0.595029
Arhgap23	0.0307954	4.42704	0.391804	0.707787
Arhgap26	-0.0787922	2.52318	-0.315645	0.762209
Arhgap27	0.243853	1.97705	0.381856	0.714799
Arhgap28	0.187522	3.67229	1.04339	0.334179
Arhgap29	-0.232468	2.63972	-1.91263	0.100801
Arhgap30	0.129022	2.25848	0.384545	0.7129
Arhgap31	-0.109969	0.100199	-0.149467	0.885737
Arhgap32	0.0114028	5.91962	0.047507	0.963542
Arhgap39	-0.026564	4.48539	-0.295478	0.776885
Arhgap4	0.0808939	1.93661	0.524229	0.617591
Arhgap42	-0.0327371	4.49425	-0.236045	0.820695
Arhgap44	-0.246338	2.37808	-1.0289	0.340451
Arhgap5	-0.0765106	7.41777	-0.795237	0.454656
Arhgap8	0.71297	3.89889	2.76795	0.0300791
Arhgap9	0.532971	3.19435	1.62367	0.151976
Arhgdia	-0.0242506	7.8247	-0.189281	0.855672
Arhgef1	0.270236	5.70406	1.80042	0.118298
Arhgef10	0.620716	2.55324	1.68155	0.140047
Arhgef10l	0.203741	5.12689	2.67824	0.0340572
Arhgef11	0.0342222	5.33432	0.515742	0.623183
Arhgef12	0.103751	6.44694	1.10645	0.307968
Arhgef15	0.308032	3.52338	1.44275	0.195704
Arhgef16	1.23352	4.28166	9.07726	6.47954e-05
Arhgef17	0.616665	4.68764	5.48635	0.00119732
Arhgef18	0.295272	7.31244	2.05489	0.0822547
Arhgef19	0.443933	2.93037	2.15696	0.0710937
Arhgef2	0.704817	6.29606	3.2681	0.0153289
Arhgef25	0.604428	5.0822	2.37232	0.0523306
Arhgef3	-0.0085362	3.4384	-0.0217071	0.983336
Arhgef4	-0.0319258	1.58811	-0.0752951	0.942255
Arhgef40	-0.0685876	0.129352	-0.115839	0.911293
Arhgef5	0.952217	3.54832	4.76384	0.00254134
Arhgef7	0.335585	5.54422	2.83294	0.0275064
Arid1a	-0.134408	6.13135	-1.12187	0.301822
Arid1b	-0.27559	5.46596	-3.13232	0.018346
Arid2	-0.219858	6.43876	-3.9162	0.00675126
Arid3a	0.400646	5.1356	5.74775	0.000927166
Arid3b	-0.291686	5.49055	-3.33905	0.01397
Arid4a	-0.161389	5.36426	-1.53998	0.170931
Arid4b	-0.196684	5.81209	-2.96458	0.0229861
Arid5a	0.151281	3.17344	1.32099	0.231307
Arid5b	-0.177808	7.03361	-1.43779	0.197051
Arih1	0.0338773	7.1542	0.607887	0.563981
Arih2	-0.427488	7.68143	-3.04002	0.0207598
Arl1	-0.105399	6.54747	-1.96794	0.0931418
Arl10	0.108512	3.00579	0.663538	0.52991
Arl11	0.878718	0.315868	2.11205	0.0758022
Arl13b	-0.0159657	4.78542	-0.162485	0.875881
Arl15	0.0167592	6.0426	0.17218	0.868557
Arl16	-0.114524	2.86285	-0.826806	0.437773
Arl2	0.077865	4.30403	0.643685	0.541914
Arl2bp	0.236937	5.00979	3.45561	0.0120132
Arl3	0.00805742	4.85591	0.0690096	0.947066
Arl4a	-0.581665	4.62049	-4.81563	0.00240221
Arl4c	-0.114968	1.52693	-0.406899	0.697205
Arl4d	0.225701	0.404082	0.680655	0.519696
Arl5a	-0.084101	6.34671	-1.19794	0.272978
Arl5b	-0.196925	6.68744	-3.59867	0.0100098
Arl5c	0.126198	2.29491	0.280092	0.788149
Arl6	-0.201201	4.30114	-2.41247	0.0494404
Arl6ip1	0.0339334	8.68972	0.59908	0.569492
Arl6ip4	-0.170892	4.98288	-2.40942	0.0496538
Arl6ip5	0.555136	4.83263	1.70997	0.134522
Arl6ip6	-0.153227	5.53596	-2.52862	0.0419754
Arl8a	-0.429289	4.10446	-2.37793	0.0519163
Arl8b	0.356963	7.05648	5.83908	0.00084958
Armc1	-0.131824	6.20913	-1.33895	0.225716
Armc10	-0.0576342	6.72542	-0.599723	0.569089
Armc5	0.241443	4.29431	1.67365	0.141621
Armc6	0.477501	4.4823	2.84113	0.027199
Armc7	-0.399049	2.57443	-3.25893	0.0155148
Armc8	-0.175914	6.03719	-1.74425	0.128135
Armc9	-0.265779	3.71092	-2.24534	0.0626754
Armcx1	-0.616933	4.21398	-5.31195	0.00142681
Armcx2	-0.637006	3.97357	-5.26117	0.00150266
Armcx3	-0.51641	0.870093	-1.34347	0.224328
Armcx4	-0.471707	3.63848	-3.36886	0.0134386
Armcx5	-0.0711011	3.70596	-0.728861	0.491621
Armcx6	-0.190703	0.216727	-0.541753	0.606132
Arnt	-0.216431	5.85838	-3.80888	0.00769925
Arnt2	-0.4224	0.78564	-2.44558	0.0471812
Arntl	-0.308235	4.93062	-3.88422	0.00701948
Arntl2	-2.97678	1.14112	-9.62995	4.52473e-05
Arpc1a	-0.0312625	6.09941	-0.33333	0.749425
Arpc1b	-0.114502	6.66126	-1.09958	0.310741
Arpc2	-0.0672702	6.76412	-1.21933	0.265303
Arpc3	-0.1282	6.45179	-1.88108	0.105446
Arpc4	0.33584	7.00739	3.40214	0.0128711
Arpc5	-0.170609	6.32038	-2.12883	0.0740071
Arpc5l	0.0845264	5.38163	0.7355	0.487834
Arpp19	-0.187645	6.53071	-2.94683	0.0235464
Arrb1	-1.2226	1.06154	-6.04085	0.000702834
Arrb2	0.14797	5.25921	1.96743	0.0932093
Arrdc1	0.323253	3.14574	1.35592	0.220544
Arrdc2	0.744394	4.69927	3.01987	0.0213309
Arrdc3	0.0760287	7.30304	1.30432	0.236605
Arrdc4	0.235678	5.30953	3.57609	0.0103001
Arsa	0.415669	4.39772	1.0241	0.342545
Arsg	1.17595	1.00386	1.74167	0.128606
Arsk	0.276758	2.90036	1.49869	0.181077
Art5	0.458985	1.26476	2.32978	0.0555847
Artn	1.34523	-0.220872	1.7981	0.118688
Arv1	0.727076	3.19937	4.78171	0.00249235
Arvcf	0.648066	5.79375	7.60057	0.000187262
Arxes1	-0.626312	3.17968	-3.46984	0.0117956
Arxes2	-0.529147	3.9717	-5.04245	0.00188549
As3mt	-0.214216	2.69442	-1.29797	0.238653
Asah1	0.0497635	8.03565	0.372826	0.72119
Asap1	-0.00591203	5.10534	-0.0639164	0.950966
Asap2	-0.117919	4.38469	-1.165	0.285172
Asap3	0.108067	3.69625	0.40976	0.695207
Asb1	0.0576747	4.37489	0.612576	0.56106
Asb13	-0.0291433	3.11974	-0.21437	0.836857
Asb16	-0.154957	0.930178	-0.51697	0.622372
Asb3	-0.219944	3.90182	-2.52406	0.0422452
Asb6	-0.0432142	4.93278	-0.282656	0.786268
Asb7	0.0102138	4.80811	0.137806	0.894584
Asb8	0.291975	5.15853	1.57724	0.162236
Ascc1	0.0464965	4.57851	0.464573	0.657464
Ascc2	-0.111782	5.0359	-1.08438	0.316945
Ascc3	-0.0741606	6.57928	-1.24265	0.257142
Ascl2	0.26311	0.228195	0.538014	0.608567
Asf1a	-0.265598	5.39349	-4.10483	0.00538183
Asf1b	0.342492	5.44039	2.44241	0.0473923
Ash1l	0.102875	5.33108	1.04407	0.333889
Ash2l	0.422869	8.92092	6.23372	0.00058886
Asl	-0.269341	4.34811	-0.889127	0.405779
Asna1	0.34916	7.86714	4.89532	0.00220447
Asns	0.235317	10.4868	3.23701	0.0159689
Asnsd1	0.0731691	6.56533	1.46804	0.18896
Aspa	-1.20434	1.05906	-5.18864	0.00161896
Aspg	0.304858	0.326875	0.525112	0.617011
Asph	-0.0104761	5.62207	-0.0412911	0.968309
Asphd2	-0.463237	0.0577701	-0.624652	0.55358
Aspm	0.131181	7.20035	1.77508	0.122641
Aspscr1	-0.310849	6.41068	-4.02004	0.00595516
Asrgl1	-0.425447	4.33904	-1.64479	0.147516
Ass1	0.459617	7.83469	6.87037	0.00033771
Aste1	-0.135131	3.95601	-0.770186	0.468374
Asxl1	-0.171301	6.8589	-0.917984	0.391565
Asxl2	-0.118563	6.56618	-0.901232	0.39977
Asxl3	0.344091	2.0471	2.61834	0.0370202
Asz1	-0.153515	0.283494	-0.253155	0.808002
Atad1	0.065684	6.6822	0.60701	0.564529
Atad2	0.174125	8.30228	1.73689	0.129482
Atad2b	-0.293755	5.51136	-2.26876	0.0606205
Atad3a	0.0799478	6.9437	1.13853	0.295298
Atad5	-0.0673365	6.75508	-0.68063	0.519711
Atat1	-0.0726027	3.04167	-0.489453	0.640676
Ate1	0.0481183	5.6711	0.810029	0.446689
Atf1	-0.0854869	5.52059	-0.714479	0.499889
Atf2	-0.212061	6.35972	-2.01425	0.0871745
Atf3	1.2862	1.77363	1.49355	0.182377
Atf4	0.3103	8.49012	5.48162	0.00120297
Atf5	-0.385922	3.52766	-2.18284	0.068516
Atf6	-0.0906344	5.35723	-0.69526	0.511083
Atf6b	-0.0558568	5.3745	-0.895495	0.40261
Atf7	0.0930719	2.56662	0.737574	0.486656
Atf7ip	0.33528	6.56364	3.76788	0.00809931
Atf7ip2	-0.760751	3.25478	-5.06406	0.00184315
Atg10	0.320974	0.969739	1.31787	0.232291
Atg12	-0.0665322	5.90774	-0.886787	0.406948
Atg13	-0.0374308	5.75684	-0.149045	0.886057
Atg14	-0.292311	5.13295	-1.05826	0.32784
Atg16l1	-0.209837	6.03362	-2.24643	0.0625783
Atg16l2	0.292804	2.33941	1.69622	0.137169
Atg2a	-0.116179	5.73979	-0.365611	0.726315
Atg2b	0.0805638	6.3023	1.08396	0.317119
Atg3	-0.0111454	4.59041	-0.155975	0.880807
Atg4a	-0.260788	2.06809	-1.72971	0.130807
Atg4a-ps	-0.0641567	0.337078	-0.20634	0.842868
Atg4b	0.00550446	5.78651	0.0503669	0.961349
Atg4c	0.244716	3.12725	1.94294	0.0965295
Atg4d	0.108592	4.99332	1.39516	0.208985
Atg5	0.0259346	5.62214	0.338329	0.745827
Atg7	0.47045	4.46188	5.37071	0.00134437
Atg9a	-0.015727	3.62759	-0.104846	0.919674
Atg9b	0.0417575	3.42336	0.20001	0.847613
Athl1	0.212201	4.77181	1.26577	0.249268
Atic	0.102369	8.08242	0.902624	0.399084
Atl1	0.0442389	1.09186	0.106691	0.918267
Atl2	-0.0249801	5.78784	-0.325886	0.754796
Atl3	-0.045267	5.77355	-0.457622	0.662193
Atm	0.21306	6.90871	1.02609	0.341675
Atmin	0.0334859	7.1194	0.526501	0.616099
Atn1	0.192285	2.58084	1.3077	0.235522
Atox1	-0.255105	5.80798	-2.67699	0.0341164
Atp10a	0.0688471	4.06614	0.350276	0.737256
Atp10d	0.310769	3.75426	3.16185	0.0176391
Atp11a	0.331617	5.33703	4.8616	0.00228583
Atp11b	0.159044	5.93572	2.60551	0.0376894
Atp11c	0.0124067	5.65824	0.179011	0.863405
Atp12a	1.27502	1.07064	6.83677	0.00034741
Atp13a1	0.313571	6.98567	5.11002	0.00175662
Atp13a2	0.21249	5.31342	1.88273	0.105198
Atp13a3	-0.0956886	7.79631	-1.57441	0.16288
Atp1a1	-0.1065	8.95426	-1.75481	0.126227
Atp1b1	-0.0549152	7.42253	-0.335237	0.748052
Atp1b2	0.556959	0.696428	1.48717	0.184004
Atp1b3	0.0541326	6.51421	0.870819	0.414994
Atp2a2	-0.19693	8.41281	-2.3023	0.0577973
Atp2a3	1.07131	5.55485	12.2055	1.04857e-05
Atp2b1	-0.0743508	7.54372	-1.33083	0.228229
Atp2b4	-0.945703	4.94443	-2.33995	0.0547886
Atp2c1	-0.106937	7.21557	-0.939907	0.381021
Atp5a1	-0.0557673	10.4066	-0.692797	0.512529
Atp5b	-0.0514455	10.9102	-0.891693	0.4045
Atp5c1	-0.113546	8.35966	-2.084	0.0789026
Atp5d	0.0277847	6.83939	0.364789	0.726899
Atp5e	0.137414	6.1081	1.23041	0.261397
Atp5f1	0.0383071	8.08661	0.709608	0.502711
Atp5g1	-0.00115798	7.24147	-0.0100464	0.992287
Atp5g2	-0.11285	6.3541	-1.98781	0.0905334
Atp5g3	-0.000747334	7.76639	-0.00602827	0.995372
Atp5h	-0.0981867	7.1638	-1.67319	0.141713
Atp5j	-0.121206	6.33883	-1.19144	0.275348
Atp5j2	0.0166778	7.17554	0.224147	0.829556
Atp5k	-0.291064	6.45507	-2.24224	0.062953
Atp5l	-0.0181277	5.88631	-0.242014	0.81626
Atp5l-ps1	0.278767	0.503315	1.19046	0.275706
Atp5l2	0.0601005	2.79121	0.422298	0.686485
Atp5o	0.0126845	7.85074	0.154172	0.882172
Atp5s	0.147933	1.8586	0.40117	0.701213
Atp5sl	-0.0103762	5.12581	-0.0969627	0.925691
Atp6ap1	-0.0667698	6.7631	-0.4594	0.660982
Atp6ap2	-0.0933862	7.23862	-1.59641	0.157923
Atp6v0a1	0.0759867	4.90829	0.583905	0.579062
Atp6v0a2	0.072273	5.67829	1.22199	0.264361
Atp6v0a4	0.518939	2.96608	2.00656	0.0881379
Atp6v0b	0.141797	6.52113	0.777269	0.464466
Atp6v0c	-0.106535	7.5261	-1.85468	0.109495
Atp6v0d1	0.309406	6.37376	3.28693	0.0149548
Atp6v0e	-0.120192	5.3451	-1.9525	0.0952201
Atp6v0e2	0.563772	4.24525	2.05317	0.0824565
Atp6v1a	-0.245173	7.80152	-1.60472	0.156088
Atp6v1b2	0.322592	7.67492	5.25501	0.00151215
Atp6v1c1	-0.249258	6.71556	-2.97014	0.0228136
Atp6v1d	-0.256965	6.1098	-4.32234	0.00417157
Atp6v1e1	0.316861	7.15617	2.97814	0.0225678
Atp6v1f	0.440937	6.28099	3.63689	0.00953861
Atp6v1g1	0.0141692	6.77595	0.149581	0.885651
Atp6v1h	-0.259231	6.74603	-2.76551	0.0301802
Atp7a	-0.146271	4.90946	-1.87823	0.105875
Atp7b	0.0203969	3.2201	0.118426	0.909323
Atp8a1	-0.139653	4.64634	-0.649366	0.538462
Atp8b2	-0.760452	7.85986	-7.07369	0.000285178
Atp8b3	0.635743	-0.0979347	0.919048	0.391049
Atp9a	0.282824	6.15246	3.62271	0.00971062
Atp9b	-0.0664114	5.51006	-1.05987	0.327162
Atpaf1	-0.195312	4.40963	-1.50478	0.179545
Atpaf2	0.123399	4.90286	1.28354	0.243361
Atpbd4	-0.178187	4.33573	-1.68525	0.139316
Atpif1	-0.0255472	6.8607	-0.372631	0.721328
Atr	0.266269	6.81677	4.58687	0.00308932
Atrip	-0.0890743	4.59538	-1.16968	0.283409
Atrn	0.0291515	4.70773	0.4122	0.693506
Atrnl1	0.47693	4.87734	2.75328	0.0306943
Atrx	-0.0571901	8.75631	-0.365188	0.726615
Atxn10	0.0574452	7.5669	1.0231	0.342987
Atxn1l	0.171969	5.61541	2.70692	0.0327281
Atxn2	-0.0722139	4.93159	-0.970756	0.366553
Atxn2l	0.0760954	6.48155	0.720357	0.496499
Atxn3	-0.0707251	6.56982	-1.31958	0.23175
Atxn7	-0.0665601	3.663	-0.495571	0.636582
Atxn7l1	-0.46414	2.07111	-1.21483	0.266901
Atxn7l2	-0.0401358	3.53185	-0.206431	0.842799
Atxn7l3	-0.116805	6.93737	-1.03199	0.339105
Atxn7l3b	-0.049691	6.36668	-0.8499	0.425711
Auh	0.0564487	4.7146	0.434618	0.677965
Aup1	0.449192	5.7426	3.30442	0.0146162
Aurka	-0.178077	6.97176	-2.75718	0.0305295
Aurkaip1	-0.0372899	5.85994	-0.604811	0.565902
Aurkb	0.0290701	6.48924	0.424911	0.684674
Auts2	-0.00565439	4.338	-0.0362051	0.97221
Aven	-0.160348	4.438	-0.87696	0.411886
Avl9	0.323918	7.01374	5.39149	0.00131652
Avpi1	-0.193103	5.91757	-2.46887	0.0456562
Axin1	-0.0480332	6.37328	-0.415194	0.691421
Axin2	-0.110249	5.62041	-1.16424	0.285457
Axl	-0.418927	0.00998178	-0.837225	0.432301
Azi1	0.168601	3.91163	1.05332	0.329934
Azi2	0.0010879	5.60146	0.020444	0.984305
Azin1	-0.358665	7.39171	-3.33449	0.0140533
B130006D01Rik	0.62034	-0.219708	2.05378	0.0823852
B130055M24Rik	-0.289048	1.4652	-0.812399	0.445421
B230118H07Rik	-0.303216	2.99053	-2.04064	0.0839473
B230120H23Rik	-0.236441	4.92271	-0.736478	0.487278
B230206F22Rik	0.422521	1.64816	1.57784	0.162099
B230206L02Rik	0.364552	1.51513	0.4904	0.640041
B230208H17Rik	0.24083	5.89895	2.85724	0.0266053
B230217C12Rik	0.150384	1.29699	0.483661	0.644564
B230219D22Rik	0.129654	6.74067	1.66201	0.143971
B230307C23Rik	0.0122564	3.21949	0.126992	0.902802
B230312A22Rik	-0.188015	3.10815	-1.0345	0.338013
B230312C02Rik	-0.892855	-0.206045	-3.00316	0.0218171
B230314M03Rik	-2.33603	0.461368	-11.7468	1.33081e-05
B230325K18Rik	-0.0683181	0.20205	-0.25774	0.804612
B230354K17Rik	-0.162645	5.76972	-0.999996	0.353236
B230369F24Rik	-0.352816	-0.144271	-1.34338	0.224354
B2m	-0.394429	4.21525	-2.31028	0.0571456
B330016D10Rik	0.191248	0.140848	0.534131	0.611101
B3galnt1	-0.971702	1.30758	-5.50488	0.00117549
B3galnt2	-0.172166	5.84828	-1.82854	0.113652
B3galt4	0.0297136	2.17201	0.170484	0.869837
B3galt6	0.138377	3.90547	1.50938	0.178396
B3galtl	-0.115027	5.1945	-0.956624	0.373127
B3gat3	-0.31695	3.99314	-2.01063	0.0876274
B3gnt1	0.250259	4.15324	1.55573	0.167204
B3gnt2	-0.537367	0.301504	-2.14947	0.071858
B3gnt3	-0.216763	3.46028	-0.561023	0.593669
B3gnt5	-0.0868789	5.6582	-0.628675	0.551101
B3gnt7	0.119413	4.81389	0.410463	0.694717
B3gnt9-ps	0.286061	0.261807	0.566641	0.590063
B3gntl1	0.130986	3.9193	1.04409	0.333881
B4galnt1	0.166064	1.46598	0.249218	0.810918
B4galnt2	0.00781122	-0.422239	0.0124545	0.990438
B4galnt3	0.841972	6.56111	7.20857	0.000255466
B4galnt4	-0.00218429	7.14372	-0.0205169	0.984249
B4galt1	0.131646	5.54704	2.06016	0.0816367
B4galt2	0.303373	2.94659	1.30215	0.237302
B4galt3	0.0997526	5.01184	1.57055	0.163766
B4galt4	0.0555114	2.78353	0.101469	0.922251
B4galt5	0.38304	5.93437	2.79741	0.0288826
B4galt6	-0.0668006	7.30847	-1.2163	0.266377
B4galt7	-0.050364	4.01185	-0.324271	0.755963
B630005N14Rik	0.182469	4.96338	1.21152	0.268085
B930036N10Rik	-0.365875	-0.56012	-0.483208	0.644869
B930041F14Rik	0.600033	3.56766	1.5619	0.165765
B9d1	-0.113031	3.35326	-1.16387	0.285598
B9d2	-0.298271	1.36859	-1.76001	0.125297
BC002059	-0.305642	3.89479	-2.00188	0.0887297
BC002163	-0.144994	2.68666	-1.26311	0.250163
BC002230	-0.119868	5.34926	-0.681276	0.519328
BC003266	-0.00353917	4.69408	-0.044148	0.966118
BC003331	-0.0101845	4.74749	-0.0672788	0.948391
BC003965	0.0249473	5.18143	0.415173	0.691435
BC004004	0.320121	4.58829	2.16963	0.069819
BC005537	0.222311	6.79698	1.86103	0.108507
BC005561	0.0746968	4.68402	0.741106	0.484652
BC005624	-0.0279897	4.96635	-0.229238	0.825761
BC013529	-0.210084	3.75421	-0.771456	0.467672
BC016423	-0.175737	6.33537	-1.59987	0.157156
BC016495	-0.109449	4.49374	-0.666831	0.527935
BC017158	0.02524	3.74378	0.166733	0.872671
BC017612	0.339476	1.50859	1.10268	0.309487
BC017643	-0.193654	4.21946	-2.04103	0.0839007
BC017647	-0.341498	3.65314	-1.8251	0.114211
BC018242	-0.188257	1.29079	-0.509151	0.627544
BC018507	0.102675	6.92495	0.877784	0.41147
BC021614	0.860757	1.56114	3.11552	0.0187618
BC022687	-0.254949	2.2467	-2.04732	0.0831496
BC023829	-0.0604219	3.61434	-0.600723	0.568461
BC024479	0.0680975	5.21473	0.300137	0.773485
BC024659	-0.0566614	3.9666	-0.629234	0.550757
BC024978	-0.358484	2.84162	-3.21826	0.016369
BC025920	0.628225	0.284067	1.42203	0.201388
BC026585	0.546759	2.25996	1.13859	0.295274
BC026590	-0.277487	3.55507	-2.90219	0.0250206
BC027231	-0.102444	5.64653	-0.540879	0.606701
BC028528	-0.0711411	0.830392	-0.116671	0.910659
BC029214	0.502343	0.677801	1.34077	0.225155
BC029722	0.189999	1.7195	1.15284	0.289785
BC030307	-0.181804	0.00297477	-0.637094	0.545936
BC030336	-0.18756	4.74009	-1.61302	0.154275
BC030499	-0.145366	-0.0114	-0.421238	0.687221
BC030867	0.0578395	4.77374	0.287068	0.783035
BC031181	-0.0176739	5.22493	-0.280223	0.788053
BC031353	0.300588	2.5872	1.50914	0.178457
BC031781	-0.180411	6.73939	-2.4793	0.0449903
BC032203	-0.558122	5.96973	-2.71515	0.0323569
BC033916	-0.249975	2.44579	-0.782847	0.461405
BC034090	1.42437	0.371941	5.80159	0.000880503
BC037034	0.0541133	4.2851	0.399268	0.702545
BC039771	0.105103	0.316541	0.413557	0.692561
BC046331	0.104737	4.65647	0.81301	0.445095
BC046404	1.2899	0.778473	2.37174	0.0523739
BC048355	0.237828	4.8969	2.45211	0.0467486
BC048403	0.162176	3.37917	1.69831	0.136763
BC051077	-0.564909	0.478878	-1.96671	0.0933055
BC051226	0.772493	1.83506	2.4711	0.0455131
BC052040	0.0633014	3.68557	0.729287	0.491377
BC053393	-2.08937	-0.433842	-3.7092	0.00871222
BC053749	0.33267	1.9159	2.13132	0.0737442
BC055111	1.20021	1.85093	1.16901	0.283663
BC055324	-0.171898	6.22102	-1.9135	0.100676
BC056474	0.390845	4.94192	4.32601	0.00415392
BC057022	-0.220121	2.02773	-1.6411	0.148287
BC057079	0.405301	5.23562	1.28266	0.243648
BC060267	0.264866	1.72107	1.00245	0.352135
BC064078	-2.18193	1.61625	-5.92992	0.000779607
BC065397	0.0850607	2.10497	0.546422	0.603099
BC067068	-0.483347	3.28335	-2.83224	0.0275329
BC067074	-0.263934	4.47646	-2.13694	0.073155
BC068281	-0.0379338	3.76533	-0.376593	0.718521
BC088983	0.4427	5.04309	4.38129	0.00389806
Baat1	0.282346	4.9258	2.45727	0.046409
Bace1	-0.501472	5.48843	-4.8385	0.0023435
Bach1	-0.121597	6.93035	-1.81112	0.116508
Bach2	0.390443	0.900769	1.67854	0.140644
Bad	-0.153248	3.42047	-1.13782	0.295575
Bag1	0.138266	6.21321	1.42912	0.199427
Bag2	-1.08053	1.61942	-2.96347	0.0230206
Bag3	-0.553472	3.45401	-2.65307	0.0352704
Bag4	0.412331	6.70479	5.10807	0.00176019
Bag5	0.00751336	4.99052	0.0393282	0.969815
Bag6	-0.0704469	7.67617	-1.09379	0.31309
Bahcc1	0.23993	4.87587	0.861485	0.419751
Bahd1	0.0512162	5.03634	0.563807	0.591881
Bai1	0.0682061	3.18475	0.431007	0.680457
Baiap2	0.294201	3.95983	1.89589	0.103241
Baiap2l1	0.399523	0.139166	1.01328	0.347311
Bak1	-0.255979	4.88945	-2.56787	0.039727
Bambi	-0.674242	3.36744	-6.70847	0.000387479
Banf1	-0.0173593	7.07673	-0.247561	0.812145
Banp	0.614821	5.13895	3.92604	0.00667099
Bap1	0.0568542	6.64845	0.722928	0.495021
Bard1	-0.0407718	5.72932	-0.375785	0.719093
Basp1	-0.947287	3.94459	-5.75456	0.000921111
Bax	0.0437468	7.20114	0.791686	0.456583
Baz1a	-0.218212	4.01525	-0.90957	0.39567
Baz1b	0.0652835	7.93205	0.374809	0.719785
Baz2a	-0.0165909	7.76037	-0.171314	0.86921
Baz2b	-0.222668	6.42842	-3.95197	0.00646446
Bbc3	0.328189	4.0946	1.19168	0.275262
Bbip1	-0.0123542	3.27913	-0.101513	0.922217
Bbs1	-0.0472353	2.0062	-0.263202	0.800579
Bbs10	-0.0183619	2.94382	-0.128249	0.901847
Bbs12	-0.265222	1.93112	-1.77836	0.12207
Bbs2	0.341255	4.24988	3.98136	0.0062389
Bbs4	0.041335	4.32829	0.259914	0.803006
Bbs5	-0.35148	2.97104	-3.52171	0.0110378
Bbs7	-0.229672	3.04842	-1.15087	0.29054
Bbs9	-0.316725	4.52613	-1.2879	0.241928
Bbx	0.00843267	5.54022	0.0270312	0.97925
Bcam	0.549282	6.41725	4.32923	0.00413854
Bcap29	-0.151335	3.97605	-0.511382	0.626066
Bcap31	0.122323	6.57876	1.56315	0.165474
Bcar1	0.108105	4.99845	0.954824	0.37397
Bcar3	0.349715	5.86908	3.97189	0.00631062
Bcas2	-0.121798	7.32186	-1.9581	0.0944598
Bcas3	-0.584254	5.66899	-10.9744	2.02839e-05
Bcat1	-0.339407	8.94977	-2.66741	0.0345738
Bcat2	0.138926	6.70139	1.26987	0.247895
Bccip	-0.0710628	6.55319	-0.724401	0.494175
Bcdin3d	0.292859	2.67949	0.919928	0.390622
Bche	-0.975988	3.01722	-8.63389	8.76524e-05
Bckdha	-0.156062	5.3106	-1.24845	0.255146
Bckdhb	-0.196043	5.0486	-2.25735	0.0616131
Bckdk	0.14138	5.68678	2.08793	0.07846
Bcl10	-0.0377679	5.48511	-0.467123	0.655733
Bcl11a	0.00861568	0.535047	0.0186449	0.985686
Bcl11b	0.141346	0.370423	0.281893	0.786828
Bcl2l1	-0.173066	4.74649	-1.22434	0.26353
Bcl2l11	0.280708	3.61278	2.30459	0.0576095
Bcl2l12	-0.134163	4.49384	-1.16226	0.286205
Bcl2l13	0.509498	6.32596	5.74204	0.000932281
Bcl2l14	-0.152209	2.05741	-0.75	0.479634
Bcl2l15	-1.35157	-0.661757	-5.56582	0.00110679
Bcl2l2	-0.13402	4.06175	-0.708804	0.503178
Bcl3	0.143349	4.65524	0.811712	0.445789
Bcl6	0.71687	2.46082	2.68791	0.033603
Bcl6b	0.445425	2.38294	0.908728	0.396083
Bcl7a	0.0995964	4.29812	1.08944	0.314866
Bcl7b	0.0551079	4.30404	0.363543	0.727786
Bcl7c	0.237011	4.97315	2.21732	0.0652287
Bcl9	-0.0301763	2.6998	-0.188847	0.855999
Bcl9l	0.291113	2.83924	0.981558	0.361588
Bclaf1	-0.39439	8.60106	-2.18759	0.0680528
Bcor	-0.388709	5.79525	-3.10081	0.0191342
Bcorl1	0.017738	1.84349	0.12876	0.901458
Bcr	0.0712542	5.0277	0.996871	0.354641
Bcs1l	0.124543	3.92673	1.3795	0.213531
Bdh1	0.177926	5.34071	1.71276	0.133991
Bdh2	-0.304478	0.938705	-1.07749	0.319791
Bdkrb2	1.29823	2.9687	1.89633	0.103176
Bdnf	0.172866	1.49437	0.902193	0.399296
Bdp1	-0.0170561	6.8633	-0.174464	0.866834
Becn1	-0.0182749	6.13702	-0.326335	0.754472
Bend3	-0.44188	5.91277	-2.63849	0.0359941
Bend4	-0.0810524	5.19908	-0.636862	0.546078
Bend5	0.261254	0.485635	0.832822	0.434608
Bend7	0.839867	0.812297	1.14077	0.29443
Bet1	0.502352	4.87164	2.50294	0.0435179
Bet1l	-0.0184713	4.30967	-0.153661	0.88256
Bex1	-0.304251	6.25199	-1.57278	0.163253
Bex2	-0.175501	5.17176	-1.9992	0.0890702
Bex4	-0.37514	6.10973	-3.82065	0.00758838
Bfar	0.0723024	4.82635	0.777896	0.464121
Bglap-rs1	-1.17595	0.256045	-5.60253	0.00106759
Bhlhb9	0.102895	4.49721	0.968206	0.367732
Bhlhe40	1.17986	5.30749	2.39154	0.0509262
Bhlhe41	-0.05447	1.99324	-0.0642802	0.950688
Bhmt	-2.39357	0.165627	-2.65234	0.0353067
Bhmt2	-1.78881	0.0501947	-4.72028	0.00266535
Bicc1	-0.330364	0.0798711	-0.789172	0.457951
Bicd1	-0.117392	4.58637	-1.46684	0.189275
Bicd2	0.00840297	4.95709	0.0720282	0.944755
Bid	0.409901	6.60875	7.62885	0.000183206
Bin1	-1.05634	2.42365	-2.78293	0.0294641
Bin2	0.896813	3.36794	7.62072	0.000184362
Bin3	-0.0487569	3.73715	-0.454938	0.664024
Birc2	0.169517	6.08331	2.91155	0.0247036
Birc3	-0.0757225	2.59979	-0.509169	0.627532
Birc5	0.0992434	6.85128	1.5551	0.167351
Birc6	0.318919	8.44138	0.986378	0.35939
Birc7	-0.290271	1.40586	-1.74017	0.128879
Bivm	0.0352797	4.76182	0.254905	0.806708
Blcap	-0.0853613	4.44926	-1.07157	0.322253
Blm	0.0705266	6.80467	1.37508	0.21483
Blmh	-0.17837	6.88913	-2.36869	0.0526008
Blnk	0.48172	1.49241	0.858914	0.421068
Bloc1s2	0.115604	4.55499	0.701746	0.507287
Bloc1s3	-0.146917	3.70248	-1.0995	0.310774
Blvra	-0.0998724	2.60035	-0.631284	0.549497
Blvrb	0.0673454	5.36178	0.416364	0.690607
Blzf1	-0.256568	5.05758	-3.31948	0.0143313
Bmf	-0.273108	3.69523	-1.57911	0.16181
Bmi1	-0.0504746	5.03261	-0.693003	0.512407
Bmp1	-0.729108	0.0175567	-1.6073	0.155523
Bmp2k	0.365992	2.7416	1.88596	0.104714
Bmp7	0.724158	3.18351	1.32006	0.2316
Bmpr1a	-0.108661	6.8434	-1.92348	0.0992503
Bmpr2	-0.0521149	3.41092	-0.242123	0.81618
Bms1	0.367865	7.83701	7.26732	0.000243637
Bmyc	0.360323	2.30776	1.91063	0.10109
Bnc2	-0.139241	4.77745	-1.09927	0.310864
Bnip1	0.0782027	3.84887	0.534518	0.610848
Bnip2	-0.0157304	5.3627	-0.20648	0.842762
Bnip3	-0.316303	3.1332	-1.77621	0.122444
Bnip3l	-0.383356	6.12375	-3.97861	0.00625962
Bnipl	0.264283	0.392603	1.02839	0.340671
Bod1	-0.0848562	5.27982	-0.972478	0.365758
Bod1l	0.142415	6.64705	1.04386	0.333978
Bok	0.0220483	3.43719	0.20863	0.841153
Bola1	0.299118	3.84549	1.69498	0.13741
Bola2	-0.135923	5.54438	-1.98744	0.0905805
Bola3	0.327434	3.91829	2.14568	0.0722476
Boll	-1.54559	-0.758201	-5.88926	0.000810085
Bop1	-0.204137	6.72181	-2.1912	0.0677032
Bpgm	0.331064	4.28122	3.12961	0.0184123
Bphl	0.312042	2.20339	0.726057	0.493226
Bpifb5	0.367896	0.74242	0.737691	0.486589
Bpnt1	-0.356405	6.57423	-3.01855	0.0213688
Bptf	0.0591491	7.64316	0.354746	0.73406
Braf	0.503268	5.91903	4.50358	0.00339199
Brap	-0.0433222	5.00342	-0.545267	0.603848
Brca1	0.0457443	7.76627	0.3394	0.745057
Brca2	0.672434	6.97904	7.74342	0.00016777
Brcc3	-0.0985722	5.24872	-1.52475	0.174611
Brd1	-0.0506292	7.60006	-0.812648	0.445288
Brd2	0.101276	8.22097	1.08391	0.317139
Brd3	-0.0940073	6.41058	-0.759779	0.474156
Brd4	-0.0112614	5.88108	-0.102195	0.921697
Brd7	0.495601	6.34513	7.44797	0.000210992
Brd8	-0.0991372	7.44658	-1.77996	0.121793
Brd9	-0.134196	5.3947	-1.21885	0.265471
Bre	0.22528	4.62005	1.1645	0.285359
Brf1	-0.0582206	4.58842	-0.478659	0.647932
Brf2	0.432418	4.4019	3.53313	0.0108782
Bri3	-0.0994655	4.07382	-1.18522	0.277633
Bri3bp	-0.161195	6.42833	-3.22967	0.0161244
Brip1	-0.0102358	4.94235	-0.157169	0.879903
Brix1	-0.156287	6.78564	-1.9061	0.101745
Brms1	-0.1611	4.45412	-0.778534	0.463771
Brms1l	-0.0872412	4.86269	-0.808676	0.447413
Brox	-0.292945	4.96708	-3.93094	0.00663141
Brp44	-0.100869	3.31006	-0.836407	0.432729
Brp44l	0.226988	3.07343	1.45063	0.19358
Brpf1	0.29246	6.3926	3.40936	0.0127515
Brpf3	-0.0618692	5.0652	-0.31526	0.762487
Brsk1	-0.206223	2.96866	-1.76665	0.124121
Brsk2	-0.0189688	0.526838	-0.0290562	0.977696
Brwd1	-0.256908	8.02775	-1.83008	0.113403
Brwd3	-0.193825	5.75796	-2.83415	0.0274605
Bscl2	0.201222	5.02279	1.28089	0.244233
Bsdc1	-0.0795279	5.57981	-1.41865	0.202332
Bsg	0.12271	8.36851	1.77576	0.122523
Bsn	0.0624388	1.2709	0.259473	0.803332
Bspry	0.636817	4.34779	4.00914	0.00603366
Bst1	-1.2153	-0.387313	-5.13494	0.00171162
Bst2	1.6477	6.56264	4.60829	0.00301647
Btaf1	-0.0204356	7.4261	-0.167314	0.872232
Btbd1	-0.178199	5.12506	-1.11159	0.305911
Btbd10	0.050923	5.27933	0.799257	0.452481
Btbd11	-1.1938	3.98609	-16.0471	1.87807e-06
Btbd19	0.102089	4.83072	1.13855	0.295288
Btbd2	0.12875	6.1943	2.13975	0.0728615
Btbd3	-0.0610801	4.62568	-0.564641	0.591346
Btbd6	-0.0247049	2.81694	-0.139069	0.893625
Btbd7	0.153538	5.21526	1.71841	0.132922
Btbd8	0.0995691	-0.0588366	0.188211	0.856478
Btbd9	0.124783	4.879	1.17806	0.280284
Btd	-0.282249	2.99117	-2.2924	0.0586165
Btf3	-0.182343	8.65792	-3.19761	0.016822
Btf3l4	-0.0588375	5.85502	-0.911536	0.394709
Btg1	-0.242322	6.6078	-1.22905	0.261873
Btg2	0.765422	6.19538	3.76355	0.00814291
Btg3	-0.592323	3.84039	-3.01485	0.0214756
Btla	-1.06765	-0.354447	-2.85342	0.0267448
Btn2a2	0.40972	0.445119	1.62362	0.151988
Btnl7	0.135473	0.817489	0.259458	0.803343
Btrc	-0.152771	4.95068	-1.33582	0.226683
Bub1	-0.0243978	7.58889	-0.442473	0.672559
Bub1b	-0.10659	7.6887	-2.04533	0.083386
Bub3	-0.0963954	6.83642	-0.93668	0.382559
Bud13	-0.174358	4.63223	-1.48545	0.184444
Bud31	-0.0699885	5.92471	-0.8748	0.412978
Bysl	-0.0363429	6.08737	-0.325396	0.75515
Bzrap1	0.386378	1.81048	1.41691	0.202817
Bzw1	-0.147098	9.04717	-0.939712	0.381114
Bzw2	0.0292696	7.16598	0.593553	0.572967
C030006K11Rik	0.227728	2.76111	1.1845	0.277898
C030034I22Rik	0.502921	0.239555	1.58959	0.159444
C030039L03Rik	0.228713	1.56824	1.18442	0.277928
C030044B11Rik	0.145111	1.68328	0.847915	0.426738
C030046E11Rik	-0.0061112	6.10097	-0.0624104	0.95212
C030046I01Rik	0.0497635	4.67628	0.525151	0.616985
C030048B08Rik	-0.177345	4.32393	-1.38703	0.211334
C130022K22Rik	0.494264	5.05786	6.7578	0.000371485
C130036L24Rik	0.597018	0.498392	2.28722	0.05905
C130039O16Rik	-0.183533	5.26746	-2.69637	0.0332105
C130074G19Rik	-0.0340112	4.89361	-0.210085	0.840063
C1d	-0.208616	5.15399	-2.62105	0.0368803
C1galt1	0.297652	5.83891	4.7523	0.00257356
C1galt1c1	-0.291058	3.30439	-2.2618	0.0612238
C1qbp	-0.111351	7.40534	-2.24377	0.0628159
C1ql1	0.577679	0.129107	1.68476	0.139413
C1ql3	-1.81092	-0.7372	-7.39929	0.00021927
C1qtnf6	-0.750029	0.785815	-2.30353	0.0576967
C1rl	0.392769	2.48235	1.15004	0.290859
C1s	0.0901179	3.78755	0.673048	0.52422
C2	0.367964	0.0842325	0.884488	0.4081
C230035I16Rik	0.398692	0.395397	0.852298	0.424472
C230052I12Rik	-0.0609034	3.63584	-0.511346	0.62609
C230081A13Rik	-0.132593	4.14797	-1.5858	0.160296
C230096C10Rik	-0.0954105	7.16059	-1.98229	0.0912499
C2cd2	0.388987	3.30821	0.992048	0.356818
C2cd2l	0.184185	3.45817	1.45627	0.192071
C2cd3	-0.0456327	5.13431	-0.372555	0.721383
C2cd4c	0.647391	-0.388084	1.42563	0.200391
C330002G04Rik	-0.757848	-0.145788	-2.05149	0.0826553
C330005M16Rik	0.229746	0.893727	1.0756	0.320575
C330006A16Rik	0.401699	5.11761	3.63429	0.00956995
C330006D17Rik	0.331768	0.534324	1.55752	0.166786
C330006K01Rik	-0.0782681	4.59004	-0.840864	0.430402
C330007P06Rik	-0.0163288	5.12478	-0.216435	0.835313
C330008G21Rik	-4.53794	0.441839	-19.2117	5.98692e-07
C330011M18Rik	0.90363	-0.0656567	3.93111	0.00663002
C330013F16Rik	0.360509	2.2696	1.21837	0.26564
C330013J21Rik	0.128503	1.68595	0.874332	0.413214
C330018A13Rik	0.238178	2.29781	0.529966	0.613826
C330018D20Rik	0.220441	2.15856	0.661573	0.531091
C330019G07Rik	0.188349	6.65073	1.85979	0.108699
C330021F23Rik	0.908619	2.84042	2.39884	0.0504023
C330027C09Rik	-0.115085	7.13215	-1.30377	0.236781
C330046G13Rik	-0.381281	1.6083	-1.73761	0.129348
C430002E04Rik	0.548761	3.35186	3.03535	0.0208906
C430042M11Rik	-0.0420612	0.519089	-0.177642	0.864437
C430048L16Rik	-0.167185	4.91501	-1.31431	0.233417
C4a	0.106126	0.304625	0.366573	0.72563
C530008M17Rik	-0.897583	0.667035	-2.60778	0.03757
C530028O21Rik	1.11989	2.37732	2.86528	0.0263142
C630004H02Rik	-0.203273	1.36278	-0.809069	0.447203
C77080	0.075409	6.37147	1.16267	0.28605
C77370	-0.465651	5.7118	-0.975289	0.364463
C78339	-0.135936	5.51052	-1.33538	0.226818
C80913	0.0390872	6.09445	0.670134	0.525959
C85492	-0.221043	1.25596	-1.06729	0.324039
C87436	0.439213	4.01732	3.46166	0.0119202
[truncated: 11,637 more rows]

## Sheet: Up in Elmsan1 KO vs WT
Gene	log2FC	AveExpr	T.Value	P.Value	Reactome
Dnahc17	2.39274	2.2639	6.48059	0.000472303	NA
Scnn1a	2.09674	1.7519	7.06127	0.000288108	NA
Gm2694	2.02012	1.0181	3.65625	0.00930926	NA
Epha1	1.94171	2.49881	5.23992	0.00153572	NA
Chi3l1	1.88506	1.53034	8.20021	0.000119356	NA
1520401A03Rik	1.82888	-0.0477059	5.45669	0.00123323	NA
S100a16	1.81413	0.117459	4.48049	0.00348166	NA
Nod2	1.78323	2.09327	11.1776	1.81085e-05	Signaling_by_Interleukins
Inf2	1.75728	2.89376	5.01566	0.0019395	NA
Hmha1	1.72447	5.31329	6.47856	0.000473148	NA
Gm13029	1.709	0.0173727	4.57382	0.00313471	NA
E330020D12Rik	1.68829	5.54818	3.88345	0.00702608	NA
Bst2	1.6477	6.56264	4.60829	0.00301647	NA
Pwwp2b	1.62356	1.8066	7.66263	0.000178493	NA
Tmem125	1.60814	1.26449	6.4211	0.000497792	NA
Gm757	1.60811	0.134989	4.90987	0.00217036	NA
Gsn	1.59916	1.64805	4.14791	0.00511417	Apoptotic_cleavage_of_cellular_proteins,Caspase-mediated_cleavage_of_cytoskeletal_proteins
2610528J11Rik	1.55762	1.28903	8.18598	0.000120599	NA
Lrrc8e	1.47266	0.173635	5.55057	0.00112355	NA
Efcab4a	1.47145	1.13778	3.62688	0.00965961	NA
BC034090	1.42437	0.371941	5.80159	0.000880503	NA
Cntn2	1.41933	0.859779	4.33335	0.00411889	NA
Cntnap2	1.38601	2.79983	3.61759	0.00977351	NA
Slco4a1	1.37751	2.8839	6.43843	0.000490207	NA
Rassf5	1.37493	2.31864	7.54997	0.000194776	NA
Gpr56	1.36803	5.21854	6.38229	0.000515258	NA
S100a14	1.36566	-0.120927	4.18381	0.00490232	NA
Il12rb1	1.36213	-0.177301	3.64674	0.00942121	Signaling_by_Interleukins
Fam19a4	1.33823	2.47103	9.1882	6.01984e-05	NA
Slc41a3	1.33355	2.23674	7.71301	0.000171718	NA
Snx20	1.3069	1.71232	5.0813	0.00181014	NA
Itpkb	1.30673	3.16725	8.61333	8.89174e-05	NA
Eps8	1.27696	5.47942	9.09543	6.40158e-05	NA
Atp12a	1.27502	1.07064	6.83677	0.00034741	NA
Cblc	1.26909	2.33356	3.99321	0.00615041	NA
Hist1h4i	1.25569	6.59098	8.50678	9.58192e-05	NA
Hydin	1.25303	2.09879	3.68469	0.00898319	NA
Pik3cd	1.24798	5.05789	13.2939	6.14798e-06	Downstream_signal_transduction,NGF_signalling_via_TRKA_from_the_plasma_membrane,Signaling_by_FGFR,Signaling_by_FGFR2,Signaling_by_Interleukins,Signalling_by_NGF
Nlrx1	1.24511	2.92834	6.06734	0.000685793	NA
Espn	1.23785	1.43385	3.83664	0.00744064	NA
Arhgef16	1.23352	4.28166	9.07726	6.47954e-05	Signalling_by_NGF
Esrp1	1.23315	4.80809	12.004	1.16313e-05	Signaling_by_FGFR,Signaling_by_FGFR2
Glipr2	1.22291	6.35752	16.2948	1.70442e-06	NA
Card11	1.20867	-0.432265	4.22883	0.00465034	NA
Inpp5d	1.19921	5.75053	4.55141	0.00321435	Signaling_by_Interleukins
1810019D21Rik	1.19016	1.25751	4.54772	0.00322769	NA
Aldh1l1	1.18745	6.04666	4.94791	0.00208397	NA
Rab25	1.18116	2.71166	7.74508	0.000167558	NA
Ap1m2	1.17998	5.89775	8.47635	9.79013e-05	NA
Tekt5	1.17948	0.176822	4.52794	0.00330019	NA
Mcam	1.17802	7.55204	10.2728	3.04712e-05	NA
Trerf1	1.16487	2.00238	3.8113	0.00767632	NA
E230016M11Rik	1.16382	0.824945	4.00523	0.00606205	NA
Gpx2	1.15896	6.99369	17.2911	1.16988e-06	NA
Lrp1	1.1579	5.43777	4.85449	0.0023034	NA
2210011C24Rik	1.15596	1.63332	5.09672	0.00178118	NA
4930432K21Rik	1.15547	2.16625	4.77052	0.00252289	NA
Gfra2	1.14957	-0.175946	4.00308	0.00607779	Downstream_signal_transduction,NGF_signalling_via_TRKA_from_the_plasma_membrane,Signaling_by_FGFR,Signaling_by_FGFR2,Signaling_by_Interleukins,Signalling_by_NGF
Plaur	1.14813	2.8615	5.65094	0.00101827	NA
Cldn7	1.14547	4.74039	4.57635	0.00312585	Cell-cell_junction_organization,Cell_junction_organization
Mcf2l	1.13213	5.71511	14.3465	3.80921e-06	Signalling_by_NGF
Crb2	1.12156	2.20157	3.88018	0.00705423	NA
Tspan15	1.12155	4.544	7.36109	0.000226026	NA
Cpe	1.10933	6.06781	6.40347	0.00050564	NA
Elmo3	1.09396	3.93923	8.77126	7.97067e-05	NA
Nfe2l3	1.09016	2.52039	4.17429	0.00495753	NA
Crip1	1.08652	5.01257	10.3428	2.92262e-05	NA
Gm15351	1.07999	0.990944	4.05837	0.00568801	NA
Igfbp7	1.07673	0.505969	4.50852	0.00337316	NA
Atp2a3	1.07131	5.55485	12.2055	1.04857e-05	NA
Cux2	1.06917	2.83964	5.41274	0.00128869	NA
Plec	1.06753	7.70265	11.2668	1.72395e-05	Apoptotic_cleavage_of_cellular_proteins,Caspase-mediated_cleavage_of_cytoskeletal_proteins,Cell_junction_organization
Unc13a	1.06329	3.52311	3.88041	0.00705226	NA
Gpr146	1.05369	1.55393	3.73316	0.00845602	NA
Grin1	1.05347	3.90323	7.82056	0.000158212	Downstream_signal_transduction,NGF_signalling_via_TRKA_from_the_plasma_membrane,Signaling_by_FGFR,Signaling_by_FGFR2,Signaling_by_Interleukins,Signalling_by_NGF
Dtx1	1.05097	6.44013	6.34016	0.000535014	NA
Wnk2	1.04594	1.17164	4.53587	0.00327089	NA
Rnf166	1.03351	4.35318	10.1831	3.21547e-05	NA
Cpne9	1.03147	2.24621	5.15781	0.00167145	NA
Anxa2	1.02082	1.84907	5.09251	0.00178903	NA
Capg	1.01024	3.9387	5.20392	0.00159365	NA
Tmem37	1.00879	0.758202	3.71974	0.00859853	NA
Aim1l	1.0068	3.92309	7.48098	0.000205583	NA
Fgl2	1.00078	0.186068	3.71695	0.00862844	NA
Epcam	0.998827	6.82483	6.94187	0.000318074	NA
Crb3	0.997418	4.81781	7.34797	0.000228401	NA
Tjp3	0.991728	5.87673	4.48918	0.00344761	NA
Tdrd5	0.985513	2.79211	6.00674	0.000725491	NA
Hist1h2bp	0.982075	6.1295	7.10299	0.000278403	NA
Piwil2	0.970868	3.9181	3.71637	0.00863468	NA
Adamtsl1	0.96946	2.87353	3.61155	0.0098483	NA
Cnksr1	0.962124	0.295223	3.78525	0.00792713	Downstream_signal_transduction,NGF_signalling_via_TRKA_from_the_plasma_membrane,Signaling_by_FGFR,Signaling_by_FGFR2,Signaling_by_Interleukins,Signalling_by_NGF
4833407H14Rik	0.960393	1.19417	4.30771	0.00424275	NA
Palm3	0.954935	4.75506	10.3503	2.9095e-05	NA
Arhgef5	0.952217	3.54832	4.76384	0.00254134	NA
Sh3tc1	0.947914	5.47979	8.14823	0.00012397	NA
Pvrl1	0.94708	3.61308	3.90541	0.00684049	Cell-cell_junction_organization,Cell_junction_organization
Pdpn	0.93955	5.02851	6.19742	0.000608607	NA
Slc7a2	0.935678	1.90909	4.77863	0.0025007	NA
Galr2	0.924305	0.0802031	3.63512	0.00955997	NA
Smagp	0.922449	4.25681	7.97826	0.000140541	NA
Tgfb1	0.913177	2.35735	4.0174	0.00597411	NA
Zfp69	0.910403	2.63437	5.54983	0.00112436	NA
Cldn6	0.907963	4.74164	5.11989	0.00173864	Cell-cell_junction_organization,Cell_junction_organization
Padi4	0.907912	4.36073	4.61454	0.00299557	NA
Plxna1	0.907516	6.80351	7.48761	0.000204514	NA
Mdk	0.906989	4.80564	8.89967	7.30169e-05	NA
C330011M18Rik	0.90363	-0.0656567	3.93111	0.00663002	NA
2310015A10Rik	0.902371	1.6268	4.24909	0.00454165	NA
Mapk4	0.901601	4.00961	8.14446	0.000124312	NA
Nuak2	0.901066	4.03029	10.1813	3.21909e-05	NA
9930014A18Rik	0.897552	1.15092	4.21992	0.00469904	NA
Bin2	0.896813	3.36794	7.62072	0.000184362	NA
Mmp15	0.894265	2.39123	3.72243	0.00856975	NA
Gadd45b	0.893417	3.70316	4.60338	0.00303299	NA
Kcnh2	0.890583	2.80898	5.33643	0.00139179	NA
5730419I09Rik	0.887652	6.67447	16.9062	1.34953e-06	NA
Tnfrsf1a	0.879687	3.22673	4.10169	0.00540191	NA
Mocos	0.875517	3.56562	6.38328	0.000514806	NA
Slc7a5	0.867683	8.34772	6.76219	0.000370097	NA
Krcc1	0.867569	4.63062	4.54531	0.00323641	NA
Ephb2	0.867435	3.97706	6.19982	0.000607278	NA
Dusp3	0.866258	2.20922	3.96379	0.0063727	NGF_signalling_via_TRKA_from_the_plasma_membrane,Signalling_by_NGF
Tbc1d2	0.864284	4.08027	7.54825	0.000195037	NA
AW555464	0.861942	5.72084	4.00139	0.00609013	NA
Apobec2	0.857151	3.37021	5.11047	0.0017558	NA
Unc5cl	0.857082	0.968958	4.76378	0.00254151	NA
Nup210	0.851862	8.3571	16.8606	1.37286e-06	NA
Palm	0.84543	4.86229	4.28622	0.0043497	NA
Iffo2	0.844108	4.03294	7.34768	0.000228453	NA
B4galnt3	0.841972	6.56111	7.20857	0.000255466	NA
Grtp1	0.841645	5.71847	11.9594	1.19037e-05	NA
Nos1	0.837855	2.80001	4.01627	0.00598217	NA
Gm10121	0.835522	1.66936	5.13324	0.00171465	NA
Ddx19b	0.833573	7.11142	4.76122	0.0025486	NA
AA386476	0.831876	1.29335	3.61111	0.00985376	NA
Zbtb32	0.829908	3.08246	6.04252	0.000701747	NA
Pik3c2b	0.829588	3.38448	5.00592	0.00195955	NA
1810019J16Rik	0.82865	2.66376	4.09842	0.00542299	NA
Plekha6	0.827514	1.30703	4.00997	0.00602766	NA
Fgf10	0.827345	3.42265	3.68937	0.00893074	Downstream_signal_transduction,NGF_signalling_via_TRKA_from_the_plasma_membrane,Signaling_by_FGFR,Signaling_by_FGFR2,Signaling_by_Interleukins,Signalling_by_NGF
Slc12a4	0.82388	4.89013	4.45569	0.0035809	NA
Ptpn3	0.821665	5.18143	6.64631	0.000408765	NA
Nav1	0.821487	4.74905	4.78018	0.00249649	NA
Usp43	0.819761	3.55636	3.70107	0.00880113	NA
Mctp2	0.806684	3.37323	3.83677	0.0074395	NA
Mapk13	0.806511	4.4174	6.2767	0.000566411	NGF_signalling_via_TRKA_from_the_plasma_membrane,Signalling_by_NGF
Rassf3	0.800643	3.91999	5.90166	0.000800652	NA
Kank1	0.796684	5.52967	12.6425	8.4194e-06	NA
Ppp1r14a	0.795228	1.44352	4.00973	0.00602935	NA
Fam83g	0.793794	3.77355	5.49893	0.00118245	NA
Gpt2	0.791661	7.09676	4.40662	0.00378667	NA
Csnk1e	0.788455	5.55131	7.15363	0.000267122	NA
Hhex	0.784828	1.78207	4.06665	0.00563206	NA
Klk1	0.782975	1.5775	3.6125	0.00983648	NA
Gm5514	0.779467	2.69271	4.99815	0.00197572	NA
Hs3st3b1	0.777193	3.28902	6.36808	0.000521825	NA
Gm9853	0.773998	4.65278	8.90706	7.26514e-05	NA
Tmem98	0.771315	2.60451	4.25662	0.00450196	NA
Ano8	0.770901	3.99946	3.60111	0.00997897	NA
S1pr2	0.769702	4.72674	4.54258	0.00324633	NA
Fam125a	0.768742	5.39484	6.822	0.000351775	NA
Abcg1	0.768136	5.75557	7.15799	0.000266174	NA
Jakmip1	0.767383	5.51017	9.81127	4.03783e-05	LEIN_NEURON_MARKERS
Krtcap3	0.765742	3.17391	4.77715	0.00250474	NA
Btg2	0.765422	6.19538	3.76355	0.00814291	NA
Cdh3	0.764024	5.52155	9.74191	4.21663e-05	Cell-cell_junction_organization,Cell_junction_organization
Mtmr7	0.761849	6.13152	5.14985	0.0016853	NA
Irs2	0.760686	3.61285	4.31996	0.00418309	Downstream_signal_transduction,NGF_signalling_via_TRKA_from_the_plasma_membrane,Signaling_by_FGFR,Signaling_by_FGFR2,Signaling_by_Interleukins,Signalling_by_NGF
4933403G14Rik	0.758753	3.99462	3.84175	0.00739411	NA
Dsp	0.757011	6.35876	9.25661	5.75501e-05	Apoptotic_cleavage_of_cellular_proteins
Erbb3	0.756143	6.55865	7.95107	0.000143421	Downstream_signal_transduction,NGF_signalling_via_TRKA_from_the_plasma_membrane,Signaling_by_FGFR,Signaling_by_FGFR2,Signaling_by_Interleukins,Signalling_by_NGF
Ildr1	0.751619	6.46659	13.8961	4.6556e-06	NA
Abca7	0.748161	5.80461	5.82408	0.000861802	NA
Gpr19	0.747486	4.74134	3.79289	0.00785264	NA
AI661453	0.740542	1.49632	4.22145	0.00469066	NA
Cmtm4	0.736305	4.30156	8.82504	7.68231e-05	NA
Casz1	0.732643	2.77258	5.669	0.00100054	NA
Calca	0.728309	3.43231	3.87011	0.00714161	NA
Arv1	0.727076	3.19937	4.78171	0.00249235	NA
Eomes	0.726458	3.43507	7.0192	0.000298284	NA
Susd2	0.726372	6.55334	4.51297	0.00335628	NA
Slc3a2	0.724885	7.9749	3.73506	0.00843606	NA
Sdc4	0.723797	8.1289	10.9203	2.09125e-05	NA
Camkk1	0.722527	3.84097	6.14738	0.000637072	NA
Spint2	0.722525	6.32907	11.48	1.53486e-05	NA
Tk2	0.720868	4.74284	4.1472	0.00511845	NA
Cnn2	0.720064	4.48588	4.09399	0.00545163	NA
Ggta1	0.716643	5.58409	4.07828	0.00555451	NA
Nrarp	0.715993	2.46394	5.07855	0.00181537	NA
Kcnd1	0.711458	1.58252	3.642	0.0094775	NA
Notch3	0.710556	5.14002	5.51923	0.00115889	NA
6430598A04Rik	0.710104	2.57806	3.804	0.0077457	NA
Zfhx3	0.70983	4.36106	3.84954	0.00732381	NA
AA960436	0.707294	4.00074	4.88637	0.00222574	NA
Pfkfb2	0.706883	5.84123	7.12192	0.000274124	NA
Tex15	0.70622	5.71707	7.42977	0.000214045	NA
Cldn4	0.706095	7.75504	4.11653	0.00530765	Cell-cell_junction_organization,Cell_junction_organization
Gfpt1	0.704808	6.1115	10.4083	2.81128e-05	NA
Junb	0.704796	3.76838	5.11754	0.00174291	NA
Adcy6	0.701997	3.12228	4.59185	0.00307222	Downstream_signal_transduction,NGF_signalling_via_TRKA_from_the_plasma_membrane,Signaling_by_FGFR,Signaling_by_FGFR2,Signalling_by_NGF
Nfu1	0.700733	6.49992	13.5197	5.53169e-06	NA
Ripk4	0.696934	4.38862	5.44976	0.0012418	NA
Polr1a	0.695317	8.25915	9.81039	4.04004e-05	NA
Smarca2	0.693796	3.59441	5.34323	0.00138224	LEIN_NEURON_MARKERS
Gm17296	0.69062	5.70663	11.1389	1.85016e-05	NA
A130022J15Rik	0.68841	5.5298	9.10476	6.36196e-05	NA
Jak3	0.687278	6.8257	9.54749	4.76816e-05	Downstream_signal_transduction,NGF_signalling_via_TRKA_from_the_plasma_membrane,Signaling_by_FGFR,Signaling_by_FGFR2,Signaling_by_Interleukins,Signalling_by_NGF
Rpusd3	0.685141	4.31164	3.90358	0.00685568	NA
Hook2	0.683509	6.48879	8.22612	0.000117129	NA
Hsdl1	0.682563	5.67301	8.58911	9.04349e-05	NA
Peli3	0.682027	2.05742	4.5574	0.00319285	Signaling_by_Interleukins
Myo9b	0.681965	7.24959	11.217	1.77191e-05	NA
Ccdc130	0.681361	3.7839	4.06655	0.00563276	NA
Fry	0.680896	5.41359	6.11593	0.00065573	NA
Haus8	0.679389	6.22885	10.2415	3.10466e-05	NA
Glt25d1	0.678129	8.25056	4.66412	0.00283537	NA
Mthfd2	0.677761	7.14211	4.47464	0.00350477	NA
Mboat2	0.67674	5.22419	5.70317	0.000967921	NA
Tmem209	0.675779	7.09612	3.70019	0.00881088	NA
Brca2	0.672434	6.97904	7.74342	0.00016777	NA
Dennd1c	0.672425	3.08392	5.3014	0.0014422	NA
Engase	0.671199	4.05991	4.58719	0.00308825	NA
Ptrf	0.669244	4.34737	4.07014	0.00560866	NA
Exoc4	0.668921	7.90414	3.94207	0.00654244	NA
Plekha2	0.66864	6.47937	9.80183	4.06165e-05	NA
Pex26	0.664781	4.77012	3.68684	0.00895914	NA
Ptp4a3	0.662655	4.01313	5.72154	0.000950885	NA
Copg2	0.662482	7.25387	4.25655	0.00450231	NA
Pgbd5	0.662246	3.26079	4.16786	0.00499524	NA
Vamp8	0.661312	3.98303	3.71132	0.00868923	NA
Lpar5	0.660197	1.75664	4.1805	0.00492147	NA
Spg7	0.659616	6.11002	5.12664	0.00172645	NA
Lamb2	0.659412	6.15468	9.52188	4.84682e-05	NA
Pdk1	0.658406	5.85682	8.62746	8.8046e-05	NA
A4galt	0.655986	6.59945	6.49932	0.000464587	NA
Ldhb	0.654369	8.72064	10.2724	3.04768e-05	NA
Wdr91	0.653035	4.95057	5.85246	0.000838843	NA
Grb7	0.651478	4.34123	4.71989	0.0026665	Downstream_signal_transduction
Jund	0.650632	6.32622	3.79859	0.00779753	NA
Tcl1	0.65011	5.89556	7.34532	0.000228884	NA
Dgka	0.649135	5.49654	9.44939	5.07756e-05	NA
Arvcf	0.648066	5.79375	7.60057	0.000187262	NA
Nr2f6	0.646818	4.62754	4.75706	0.00256022	NA
Fam65a	0.645022	2.28776	3.60639	0.00991268	NA
Gcdh	0.641244	6.61252	4.32945	0.00413749	NA
Tia1	0.63704	6.65562	6.33797	0.000536061	Signaling_by_FGFR,Signaling_by_FGFR2
Mtus1	0.636905	5.92012	10.4295	2.77646e-05	NA
Bspry	0.636817	4.34779	4.00914	0.00603366	NA
Zfp192	0.636455	4.5173	5.10982	0.00175698	NA
Dpysl2	0.63644	5.95588	8.90078	7.29619e-05	NA
Caprin2	0.636268	5.49532	4.6986	0.00272961	NA
Txnip	0.635398	7.54171	4.01615	0.00598302	NA
Whsc1l1	0.634122	5.01536	8.78039	7.92085e-05	NA
Frmd4b	0.633866	5.69224	10.0191	3.55205e-05	NA
Gm9844	0.633199	4.40255	4.00944	0.00603146	NA
5730559C18Rik	0.632843	3.54079	4.39524	0.00383628	NA
Casp3	0.63249	6.17557	10.4688	2.71292e-05	Apoptotic_cleavage_of_cellular_proteins,Caspase-mediated_cleavage_of_cytoskeletal_proteins,Signaling_by_Interleukins,Signalling_by_NGF
Cttnbp2	0.631339	3.82645	3.65267	0.00935119	NA
Srl	0.631043	5.12059	5.62229	0.00104714	NA
Epha4	0.630099	7.28375	3.67577	0.00908419	NA
Zfp184	0.629796	4.50489	7.23164	0.000250745	NA
Nacc2	0.628435	2.56943	4.16548	0.00500924	NA
Setd5	0.628102	8.39115	10.8508	2.17538e-05	NA
Mpv17l2	0.626213	3.73831	3.67203	0.0091268	NA
2810002N01Rik	0.62441	4.7987	4.7986	0.00244699	NA
Cdh1	0.624195	9.25528	11.1226	1.86701e-05	Apoptotic_cleavage_of_cellular_proteins,Cell-cell_junction_organization,Cell_junction_organization
Ppp1r3b	0.622933	3.63069	6.03032	0.000709742	NA
Zfp398	0.621938	3.41016	4.2461	0.00455752	NA
Upf1	0.61974	8.05322	8.41758	0.000102071	NA
Syne1	0.619333	3.68024	5.25851	0.00150675	NA
Gm7866	0.617052	4.45444	5.14623	0.00169165	Downstream_signal_transduction,NGF_signalling_via_TRKA_from_the_plasma_membrane,Signaling_by_FGFR,Signaling_by_FGFR2,Signaling_by_Interleukins,Signalling_by_NGF
Arhgef17	0.616665	4.68764	5.48635	0.00119732	Signalling_by_NGF
Cyld	0.614974	4.9273	6.67056	0.000400307	NA
Banp	0.614821	5.13895	3.92604	0.00667099	NA
2700029M09Rik	0.612291	5.61739	7.39656	0.000219746	NA
Sft2d2	0.612284	5.54214	3.66741	0.00917978	NA
Plekha4	0.610586	2.73424	4.02782	0.00589984	NA
Zxdc	0.609607	5.35579	4.01107	0.00601965	NA
Casp7	0.607727	4.02327	6.19582	0.000609492	Apoptotic_cleavage_of_cellular_proteins,Caspase-mediated_cleavage_of_cytoskeletal_proteins
Acvr1b	0.607623	5.43358	5.30645	0.00143481	NA
Itpr3	0.606221	6.02667	8.70801	8.32583e-05	Downstream_signal_transduction,NGF_signalling_via_TRKA_from_the_plasma_membrane,Signaling_by_FGFR,Signaling_by_FGFR2,Signalling_by_NGF
Sipa1l2	0.605638	7.22587	9.12317	6.28459e-05	NA
Tnk1	0.603701	4.41646	6.87222	0.000337185	NA
Aktip	0.599428	5.62017	6.21096	0.000601156	NA
Itpr1	0.598319	6.42657	3.64079	0.00949199	Downstream_signal_transduction,NGF_signalling_via_TRKA_from_the_plasma_membrane,Signaling_by_FGFR,Signaling_by_FGFR2,Signalling_by_NGF
Psmg4	0.597748	4.35105	5.85848	0.000834056	NA
Tmco7	0.597043	5.06714	6.03447	0.000707014	NA
Lphn1	0.5958	6.947	9.70612	4.31242e-05	NA
Csrnp1	0.595238	3.23155	5.67152	0.000998086	NA
Lrrc16a	0.595042	3.60011	5.74587	0.00092885	NA
Alms1	0.594936	7.04946	3.80766	0.00771084	NA
Map2k6	0.592218	5.07105	7.61234	0.000185562	Signaling_by_Interleukins
Wrn	0.589214	5.07607	4.80874	0.00242021	NA
Eefsec	0.588861	5.65141	6.12737	0.000648871	NA
Cdca7l	0.588192	5.50558	6.74083	0.0003769	NA
Ppargc1b	0.58708	2.80688	4.31857	0.0041898	NA
H2-T3	0.585343	2.80979	3.73274	0.00846045	NA
Wnk1	0.584318	7.99603	10.7842	2.25963e-05	NA
Rasgef1a	0.58388	3.75361	4.48133	0.00347832	Downstream_signal_transduction,NGF_signalling_via_TRKA_from_the_plasma_membrane,Signaling_by_FGFR,Signaling_by_FGFR2,Signaling_by_Interleukins,Signalling_by_NGF
Pvrl2	0.582564	5.51033	6.16641	0.000626073	Cell-cell_junction_organization,Cell_junction_organization
Rimklb	0.582486	6.10514	5.16927	0.00165172	NA
Eif4ebp1	0.58202	7.93418	4.97205	0.00203114	NA
Chd9	0.582011	5.8363	4.82248	0.00238445	NA
Gm5903	0.581406	4.74304	6.1163	0.000655506	NA
Pgpep1	0.580495	5.90725	7.33977	0.000229899	NA

## Sheet: Down in Elmsan1 KO vs WT
Gene	log2FC	AveExpr	T.Value	P.Value	Reactome
AY036118	-9.61094	6.30496	-8.51049	9.55693e-05	NA
Meg3	-7.13189	-2.69159	-11.4894	1.52709e-05	NA
Rian	-7.06107	-1.04585	-8.65905	8.61318e-05	NA
Rgs6	-5.16012	-2.4899	-8.73101	8.19463e-05	NA
En1	-4.55061	-1.9376	-10.951	2.05531e-05	NA
C330008G21Rik	-4.53794	0.441839	-19.2117	5.98692e-07	NA
Gm10801	-4.52482	-2.14257	-13.5826	5.37291e-06	NA
Slit3	-4.43476	-1.1859	-14.1254	4.20046e-06	Axon_guidance,Developmental_Biology
Peg10	-4.43041	3.38818	-28.2013	5.13126e-08	NA
Xlr5a	-3.76121	-2.13936	-12.0203	1.15335e-05	NA
1700048O20Rik	-3.4408	-1.89389	-5.74398	0.000930542	NA
Nxf3	-3.28006	2.46083	-7.42149	0.000215451	NA
Sp100	-3.26948	-0.736955	-7.90648	0.00014829	NA
Slfn3	-3.16566	-0.452993	-10.2317	3.12285e-05	NA
Kcnq5	-3.16475	-1.18409	-6.35854	0.00052629	Neuronal_System
Pou3f2	-3.13231	-1.62894	-4.96042	0.00205641	NA
Trpc6	-3.11444	0.135692	-10.6406	2.45425e-05	Axon_guidance,Developmental_Biology,Gastrin-CREB_signalling_pathway_via_PKC_and_MAPK
Chrna4	-3.03619	-0.604073	-11.951	1.19562e-05	Neuronal_System,Neurotransmitter_Receptor_Binding_And_Downstream_Transmission,Transmission_across_Chemical_Synapses
1700003M02Rik	-3.03165	-0.820437	-5.38589	0.00132395	NA
Dner	-2.98335	2.37758	-12.265	1.01729e-05	NA
Ccnd2	-2.97795	-0.356812	-5.66931	0.00100024	NA
Arntl2	-2.97678	1.14112	-9.62995	4.52473e-05	NA
Cdkl4	-2.90282	0.191521	-13.2694	6.21966e-06	NA
Cd59a	-2.88146	-0.00352918	-6.96083	0.000313086	NA
Otx2	-2.84671	3.30953	-5.25439	0.00151311	NA
Gm2832	-2.83111	-1.64051	-8.30295	0.0001108	NA
Gm9	-2.82504	-1.70984	-5.44459	0.00124823	NA
Slc24a5	-2.79671	2.63211	-21.1842	3.20922e-07	NA
Alcam	-2.68384	1.28807	-18.5605	7.45721e-07	LEIN_NEURON_MARKERS,Axon_guidance,Developmental_Biology,L1CAM_interactions
Pla2g16	-2.63694	-0.396651	-7.01613	0.000299041	NA
Rhox2a	-2.6313	-1.42365	-4.70757	0.00270283	NA
Abcc2	-2.62153	-0.764378	-7.85984	0.000153585	NA
Ccrn4l	-2.61784	5.22917	-36.752	9.33851e-09	NA
2210409E12Rik	-2.59006	1.04674	-9.94321	3.72117e-05	NA
Mmp16	-2.51112	1.42781	-10.0156	3.55961e-05	NA
Hck	-2.50923	-0.565151	-3.75	0.00828093	Interleukin-3_5_and_GM-CSF_signaling
Ptgs2	-2.50727	1.26261	-14.655	3.33146e-06	NA
Gria4	-2.5011	-0.542866	-8.91548	7.22384e-05	LEIN_NEURON_MARKERS,Neuronal_System,Neurotransmitter_Receptor_Binding_And_Downstream_Transmission,Transmission_across_Chemical_Synapses
Wnt7b	-2.48314	-0.191149	-8.92119	7.19596e-05	NA
Gm15564	-2.47743	-0.443488	-4.69555	0.00273878	NA
3110047P20Rik	-2.47151	-1.35091	-8.74395	8.12185e-05	NA
Gm15698	-2.46736	0.0418833	-5.51816	0.00116011	NA
Slc39a8	-2.45654	-0.641452	-7.71825	0.00017103	NA
Foxn4	-2.44293	0.612206	-10.9774	2.02502e-05	NA
Xlr4a	-2.43842	0.546076	-4.90897	0.00217245	NA
Gsx2	-2.43289	-1.36825	-3.88465	0.00701581	NA
Sall3	-2.38598	0.572291	-4.71644	0.00267663	NA
Hhip	-2.38592	0.865851	-11.041	1.95394e-05	NA
Ano1	-2.38519	0.966206	-6.01134	0.000722386	NA
Efhc2	-2.37463	-0.293361	-4.99714	0.00197784	NA
Hist1h1t	-2.37205	0.947286	-7.73007	0.00016949	NA
Gm11427	-2.36935	1.12891	-5.15052	0.00168413	NA
B230314M03Rik	-2.33603	0.461368	-11.7468	1.33081e-05	NA
Gm12209	-2.33476	-0.705906	-7.20039	0.000257164	NA
Xlr3b	-2.33227	1.68849	-5.21875	0.00156949	NA
Gm9732	-2.33036	1.17691	-8.50594	9.58765e-05	NA
Colec12	-2.29152	1.87984	-10.7645	2.28522e-05	NA
Syt4	-2.28902	-1.10228	-6.29182	0.000558743	NA
Cyp2b23	-2.28296	-1.20656	-7.39084	0.000220745	NA
Sgce	-2.26756	0.775107	-6.85878	0.000341021	NA
Ror1	-2.2588	-0.467323	-6.4753	0.00047451	NA
Heph	-2.2575	2.67323	-8.67882	8.4958e-05	NA
AI662270	-2.23638	4.3709	-9.70439	4.31711e-05	NA
Sox21	-2.22183	1.82259	-15.129	2.72547e-06	NA
Hs6st2	-2.21383	-0.88576	-4.8878	0.00222232	NA
Vstm2a	-2.19996	0.208394	-10.6571	2.43099e-05	NA
Rsph4a	-2.19732	-0.163413	-5.44109	0.0012526	NA
BC064078	-2.18193	1.61625	-5.92992	0.000779607	NA
Slc30a10	-2.17098	0.207212	-5.81684	0.000867771	NA
Fndc1	-2.14753	-0.780176	-6.29467	0.000557311	NA
1700024B05Rik	-2.14739	0.370246	-6.95501	0.000314609	NA
Gdpd3	-2.12224	1.11947	-8.04049	0.000134197	NA
Smoc1	-2.09704	2.34041	-17.3837	1.1309e-06	NA
Mthfd2l	-2.09381	2.01792	-14.6396	3.35368e-06	NA
BC053393	-2.08937	-0.433842	-3.7092	0.00871222	NA
6430704M03Rik	-2.08236	2.25514	-12.4627	9.2071e-06	NA
Gpr64	-2.08086	-0.948979	-6.94844	0.000316335	NA
Fgf15	-2.06878	-1.13761	-5.86639	0.000827822	Axon_guidance,Developmental_Biology,Gastrin-CREB_signalling_pathway_via_PKC_and_MAPK,Interleukin-3_5_and_GM-CSF_signaling,MAPK1MAPK3_signaling,MAPK_family_signaling_cascades
Gja1	-2.04704	5.53123	-5.51614	0.00116244	NA
Penk	-2.0454	-0.0923204	-7.73478	0.000168881	NA
Hmgcll1	-2.0314	-0.875666	-6.63794	0.000411731	NA
Gm364	-1.99655	-0.970692	-5.37034	0.00134488	NA
Mep1b	-1.98954	1.02127	-4.0097	0.00602961	NA
Limch1	-1.98824	0.581237	-7.03706	0.000293915	NA
Serpina3m	-1.979	1.024	-5.22702	0.00155621	NA
Cpvl	-1.96282	1.31687	-11.1188	1.87091e-05	NA
She	-1.95891	1.10971	-10.8535	2.17198e-05	NA
Accsl	-1.9342	2.59063	-12.5945	8.62161e-06	NA
Fermt1	-1.92849	2.50455	-14.4003	3.72056e-06	NA
Nlrp4c	-1.92683	-0.523941	-4.48221	0.00347487	NA
Spats2l	-1.92243	3.96036	-11.7081	1.35838e-05	NA
Ncam1	-1.9196	4.63254	-25.018	1.10672e-07	Axon_guidance,Developmental_Biology,Gastrin-CREB_signalling_pathway_via_PKC_and_MAPK,Interleukin-3_5_and_GM-CSF_signaling,L1CAM_interactions,MAPK1MAPK3_signaling,MAPK_family_signaling_cascades
Flt4	-1.91554	0.692948	-4.08874	0.00548574	NA
Tmem28	-1.9139	0.689385	-9.75809	4.17413e-05	NA
Gm20548	-1.88864	-0.584528	-5.10824	0.00175988	NA
Nlrp4a	-1.8843	0.685427	-8.63175	8.77829e-05	NA
Edil3	-1.88273	0.318445	-10.2471	3.0943e-05	NA
Kctd12b	-1.87559	0.505192	-6.5427	0.000447262	NA
Sema3e	-1.87242	-0.688973	-5.72213	0.00095035	Axon_guidance,Developmental_Biology
Ankrd35	-1.86959	4.85537	-25.2774	1.03591e-07	NA
Pcsk1	-1.85641	1.96595	-9.51944	4.85438e-05	NA
Dmgdh	-1.84094	1.14754	-5.38322	0.00132752	NA
Nrp2	-1.83576	4.43153	-12.8425	7.63244e-06	Axon_guidance,Developmental_Biology,L1CAM_interactions
Aire	-1.82778	-0.66915	-7.25497	0.000246071	NA
Gm1564	-1.81965	2.22513	-11.3061	1.68713e-05	NA
C1ql3	-1.81092	-0.7372	-7.39929	0.00021927	NA
Tcfl5	-1.80957	1.13024	-11.0379	1.95733e-05	NA
Gm11019	-1.79465	6.24631	-7.10554	0.000277823	NA
Mobp	-1.79072	0.439347	-8.17351	0.000121701	NA
4930502E18Rik	-1.78917	1.03176	-9.8542	3.93153e-05	NA
Bhmt2	-1.78881	0.0501947	-4.72028	0.00266535	NA
Tbx15	-1.77588	1.01521	-4.68453	0.00277222	NA
Fst	-1.76514	3.42036	-19.4103	5.60732e-07	NA
Itga7	-1.7635	-0.230734	-8.17575	0.000121502	NA
Nefm	-1.7621	1.06852	-8.22036	0.00011762	NA
Ephx2	-1.7368	3.9149	-4.34108	0.00408239	NA
Inhbb	-1.7356	0.377916	-5.54332	0.00113161	NA
Htr1b	-1.73459	-0.955461	-5.13963	0.00170328	NA
Tcf15	-1.72664	-0.814564	-4.32404	0.0041634	NA
Napsa	-1.71899	0.182952	-5.05453	0.00186169	NA
Dkk3	-1.71858	1.61192	-6.93182	0.000320753	NA
Saa3	-1.70993	2.95934	-9.80787	4.04639e-05	NA
Gm14074	-1.70419	1.51214	-5.30039	0.00144368	NA
Trim36	-1.69979	-0.253057	-7.61286	0.000185488	NA
Hmgn3	-1.69979	0.392675	-7.63225	0.000182726	NA
Xlr4b	-1.69507	0.507405	-3.84018	0.00740841	NA
A2m	-1.67122	3.12387	-6.64378	0.000409659	NA
Hist3h2ba	-1.66897	3.8644	-7.7066	0.000172563	Developmental_Biology
Frk	-1.66589	0.12841	-8.78049	7.92034e-05	NA
Pkd1l2	-1.66587	1.2156	-3.66849	0.00916734	NA
Gng2	-1.6645	1.68302	-3.83041	0.00749783	Gastrin-CREB_signalling_pathway_via_PKC_and_MAPK,Neuronal_System,Neurotransmitter_Receptor_Binding_And_Downstream_Transmission,Transmission_across_Chemical_Synapses
Ano3	-1.65935	1.29618	-6.23931	0.000585883	NA
Otud6a	-1.65731	-0.313153	-5.96933	0.000751294	NA
Cend1	-1.65572	-0.746114	-4.89483	0.00220563	NA
4930526L06Rik	-1.63553	-0.722302	-5.50512	0.0011752	NA
Fbp2	-1.62737	0.037151	-5.06592	0.00183956	NA
Glrx	-1.62486	2.53292	-7.52165	0.000199131	NA
Gm12260	-1.62445	2.18782	-9.82137	4.01254e-05	NA
Tbx18	-1.60218	1.40964	-5.86642	0.000827798	NA
4930500J02Rik	-1.60154	3.80575	-4.34836	0.00404827	NA
Pdzrn3	-1.60065	2.57303	-9.18138	6.04702e-05	NA
Pla2g4a	-1.59948	2.9042	-5.43366	0.00126195	NA
Gad2	-1.58446	0.403726	-5.34327	0.00138218	Neuronal_System,Transmission_across_Chemical_Synapses
Gsc	-1.58075	1.28928	-10.8955	2.1209e-05	Developmental_Biology
Smpdl3a	-1.57447	0.56718	-5.48157	0.00120303	NA
Crispld1	-1.54934	1.81357	-8.81065	7.75827e-05	NA
Boll	-1.54559	-0.758201	-5.88926	0.000810085	NA
Kif1a	-1.54513	1.70534	-4.45627	0.00357851	NA
Tgfbr3	-1.53564	1.21783	-6.03364	0.000707559	NA
Eml1	-1.53346	1.08997	-8.23437	0.00011643	NA
Cdh2	-1.52836	2.87101	-8.324	0.000109135	Developmental_Biology
Gm3512	-1.51899	-0.0400189	-4.88696	0.00222433	NA
Rhbdl2	-1.50228	1.01822	-8.64413	8.70297e-05	NA
Efhb	-1.50066	1.54645	-9.1541	6.15704e-05	NA
4930550L24Rik	-1.49627	-0.0770035	-6.58764	0.000430079	NA
Nfasc	-1.49227	0.516882	-6.30486	0.000552227	Axon_guidance,Developmental_Biology,L1CAM_interactions
Chrna9	-1.49215	1.07097	-5.54215	0.00113292	Neuronal_System,Neurotransmitter_Receptor_Binding_And_Downstream_Transmission,Transmission_across_Chemical_Synapses
Hecw2	-1.48948	1.04967	-7.31509	0.000234476	NA
Card6	-1.47506	0.516415	-8.97415	6.94316e-05	NA
Nkx1-2	-1.47025	2.91018	-8.37516	0.000105206	NA
Adamts8	-1.46443	-0.104846	-5.89645	0.000804602	NA
Ptprd	-1.46148	0.456474	-5.66938	0.00100017	NA
Crym	-1.45727	-0.447021	-6.24347	0.000583678	NA
Nptx2	-1.45362	1.70005	-5.71721	0.000954878	NA
Zfp629	-1.44043	1.06091	-8.55842	9.24008e-05	NA
Klhl13	-1.43608	5.95202	-6.43247	0.000492802	NA
Zscan5b	-1.43118	0.24562	-5.09478	0.0017848	NA
Tex13	-1.42775	2.57624	-4.98963	0.00199363	NA
Cabp7	-1.4273	0.0177125	-4.71399	0.00268382	NA
Xlr3c	-1.42403	-0.829811	-5.70745	0.000963928	NA
Rgnef	-1.41958	-0.187362	-5.80487	0.000877748	NA
9030617O03Rik	-1.41792	2.89987	-14.2173	4.03239e-06	NA
Tmem90b	-1.41346	0.577481	-6.56923	0.000437026	NA
Tceal1	-1.4023	-0.252164	-5.22651	0.00155702	NA
Cnksr2	-1.39626	1.21483	-4.17661	0.00494402	Axon_guidance,Developmental_Biology,Gastrin-CREB_signalling_pathway_via_PKC_and_MAPK,Interleukin-3_5_and_GM-CSF_signaling,MAPK1MAPK3_signaling,MAPK_family_signaling_cascades
Luzp4	-1.39617	-0.608084	-3.64053	0.00949509	NA
Mn1	-1.38568	0.278002	-6.28535	0.000562008	NA
Npr3	-1.37554	2.94678	-5.19086	0.00161525	NA
Itga10	-1.36779	0.19631	-3.90229	0.00686652	Axon_guidance,Developmental_Biology,L1CAM_interactions
Usp26	-1.36463	1.40195	-7.59592	0.000187938	NA
Kank4	-1.36401	0.251353	-6.15302	0.000633787	NA
Sarm1	-1.36059	0.79451	-5.8587	0.000833881	NA
AW551984	-1.35414	-0.405805	-6.23839	0.000586371	NA
Scarf1	-1.35188	-0.646612	-4.08621	0.0055023	NA
Bcl2l15	-1.35157	-0.661757	-5.56582	0.00110679	NA
Gm5124	-1.34877	0.259816	-6.20613	0.000603798	NA
Prr5l	-1.34861	1.38226	-7.98089	0.000140267	NA
Adamts15	-1.34786	0.775036	-6.68282	0.000396108	NA
4933427D06Rik	-1.34486	-0.0894914	-4.33686	0.00410227	NA
Lrig3	-1.34376	4.53539	-14.78	3.15777e-06	NA
Thbd	-1.34084	-0.317394	-4.20854	0.00476209	NA
Klhl3	-1.33465	-0.497082	-4.70009	0.00272515	NA
Rims1	-1.32986	3.80736	-4.67639	0.00279721	Neuronal_System,Transmission_across_Chemical_Synapses
Krtdap	-1.32941	1.73279	-9.94102	3.72618e-05	NA
Pde3b	-1.32892	2.66691	-4.02649	0.00590929	NA
Zc3h12b	-1.3225	-0.49067	-3.77607	0.00801761	NA
Pramef17	-1.3205	-0.431812	-5.7692	0.000908252	NA
Prex2	-1.31361	1.27768	-6.84849	0.000343993	NA
Gm16503	-1.30615	-0.575993	-6.02437	0.00071368	NA
Sec14l1	-1.29753	6.80257	-18.2517	8.29725e-07	NA
Gprc5b	-1.29573	3.09808	-8.3913	0.000104001	NA
Notum	-1.29166	6.90562	-21.4658	2.94953e-07	NA
Hr	-1.28625	1.60776	-9.89138	3.84204e-05	NA
Slc37a2	-1.28356	1.86827	-7.42248	0.000215282	NA
Pstpip2	-1.27945	-0.475572	-4.54387	0.00324165	NA
AC158898.1	-1.27863	-0.00495366	-4.44249	0.003635	NA
Gabrb2	-1.27103	0.169372	-5.68846	0.000981811	Neuronal_System,Neurotransmitter_Receptor_Binding_And_Downstream_Transmission,Transmission_across_Chemical_Synapses
Rab39b	-1.26754	1.00071	-4.11765	0.00530059	NA
Pdzrn4	-1.26577	2.7791	-9.77056	4.14171e-05	NA
Dpp6	-1.26545	3.46135	-5.67257	0.000997074	LEIN_NEURON_MARKERS
Fat2	-1.25999	3.557	-4.93565	0.0021114	NA
Efcab1	-1.25064	-0.6157	-4.05195	0.00573181	NA
Ccdc85a	-1.24623	2.74628	-11.2644	1.7262e-05	NA
4732444A12Rik	-1.24611	1.36061	-6.81256	0.000354596	NA
Anxa1	-1.24398	1.80072	-4.51878	0.00333437	Gastrin-CREB_signalling_pathway_via_PKC_and_MAPK
Fez1	-1.24003	3.12827	-8.41269	0.000102427	NA
Igsf10	-1.22441	0.339662	-5.6273	0.00104203	NA
Reep1	-1.22274	4.27511	-17.0853	1.26226e-06	NA
Stard8	-1.22269	2.52804	-9.57665	4.68042e-05	NA
Arrb1	-1.2226	1.06154	-6.04085	0.000702834	Axon_guidance,Developmental_Biology,Gastrin-CREB_signalling_pathway_via_PKC_and_MAPK,Interleukin-3_5_and_GM-CSF_signaling,MAPK1MAPK3_signaling,MAPK_family_signaling_cascades
Ccdc89	-1.22049	-0.231294	-4.85474	0.00230279	NA
Lrrc15	-1.2174	5.00006	-19.0857	6.24336e-07	NA
Bst1	-1.2153	-0.387313	-5.13494	0.00171162	NA
Osr2	-1.21264	-0.215563	-3.65603	0.00931185	NA
Aspa	-1.20434	1.05906	-5.18864	0.00161896	NA
T	-1.20305	-0.348221	-3.80454	0.00774054	NA
Ffar2	-1.19935	-0.501891	-3.78807	0.00789949	Gastrin-CREB_signalling_pathway_via_PKC_and_MAPK
H2-M5	-1.19411	4.64667	-17.4683	1.09657e-06	NA
Btbd11	-1.1938	3.98609	-16.0471	1.87807e-06	NA
Tanc2	-1.19343	2.01289	-8.49952	9.63119e-05	NA
Vax2os1	-1.18081	0.220305	-4.71734	0.00267396	NA
Bglap-rs1	-1.17595	0.256045	-5.60253	0.00106759	NA
Cyp2j6	-1.1717	0.862014	-4.89503	0.00220516	NA
Sstr2	-1.17089	1.73858	-5.70614	0.000965149	NA
H2-D1	-1.17028	1.57675	-5.05658	0.00185769	NA
Gm13128	-1.16613	2.03902	-5.70988	0.000961661	NA
Lyn	-1.16573	0.969708	-3.99072	0.00616892	Axon_guidance,Developmental_Biology,Interleukin-3_5_and_GM-CSF_signaling
Ahsg	-1.1623	0.279349	-5.79467	0.000886354	NA
Dcaf12l1	-1.16096	2.57595	-10.032	3.524e-05	NA
Pdgfra	-1.15979	-0.590447	-3.97485	0.00628811	Axon_guidance,Developmental_Biology,Gastrin-CREB_signalling_pathway_via_PKC_and_MAPK,Interleukin-3_5_and_GM-CSF_signaling,MAPK1MAPK3_signaling,MAPK_family_signaling_cascades
Fgfr2	-1.15743	2.16946	-4.21684	0.00471603	Axon_guidance,Developmental_Biology,Gastrin-CREB_signalling_pathway_via_PKC_and_MAPK,Interleukin-3_5_and_GM-CSF_signaling,MAPK1MAPK3_signaling,MAPK_family_signaling_cascades
Fndc4	-1.15303	1.51908	-4.69627	0.00273661	NA
Rbmxl2	-1.15146	4.49949	-11.3775	1.62259e-05	NA
Sh3gl3	-1.15067	0.510665	-5.93527	0.000775695	NA
Trpm1	-1.14891	4.95765	-3.86397	0.00719551	NA
F2r	-1.14805	4.77588	-8.98846	6.8766e-05	Gastrin-CREB_signalling_pathway_via_PKC_and_MAPK
1700034H14Rik	-1.14426	3.22057	-7.87068	0.000152335	NA
Ubd	-1.1386	4.11949	-7.65313	0.000179805	NA
Cdc42ep3	-1.13765	2.64829	-3.6155	0.0097993	MAPK_family_signaling_cascades
Steap3	-1.13632	-0.367265	-4.18445	0.00489864	NA
Efhd1	-1.13359	-0.0870546	-3.70423	0.00876648	NA
Ept1	-1.1294	5.02016	-5.49404	0.00118821	NA
Pdgfc	-1.12831	4.74644	-13.4234	5.78539e-06	NA
Grm4	-1.12413	0.641982	-5.71497	0.000956944	NA
Enah	-1.12236	7.58874	-6.59287	0.00042813	Axon_guidance,Developmental_Biology
Cited2	-1.12111	3.00938	-8.84661	7.57003e-05	NA
Zcchc18	-1.11309	0.429776	-5.45862	0.00123086	NA
Dach2	-1.11216	0.712927	-3.8729	0.00711727	NA
Ets2	-1.10998	4.9325	-7.96698	0.000141728	NA
Rcbtb2	-1.103	4.46574	-14.7151	3.24663e-06	NA
Dpp4	-1.10074	0.64919	-5.03802	0.00189431	NA
Pcyt1b	-1.09955	4.45599	-4.59591	0.00305834	NA
Tril	-1.09559	-0.320348	-4.37189	0.0039403	NA
D630039A03Rik	-1.09203	3.49729	-12.1141	1.09886e-05	NA
E130012A19Rik	-1.09137	6.45592	-5.46918	0.00121796	NA
Pak3	-1.08321	0.355663	-5.62636	0.00104298	Axon_guidance,Developmental_Biology,MAPK_family_signaling_cascades
6030419C18Rik	-1.08242	0.625659	-4.91983	0.00214737	NA
Itpka	-1.07943	4.59909	-13.9644	4.51442e-06	NA
Scml2	-1.07551	1.19756	-7.02092	0.000297861	NA
Cpne8	-1.06972	0.167426	-4.0162	0.00598269	NA
Loxl4	-1.06672	3.76161	-3.83541	0.0074519	NA
Hist3h2bb-ps	-1.06353	3.52567	-4.50208	0.00339772	Developmental_Biology
Fam59b	-1.06244	0.798548	-4.28508	0.00435545	NA
Acacb	-1.05544	5.79038	-4.58692	0.00308916	NA
Fbxo16	-1.0526	0.283396	-4.26732	0.00444627	NA
Plch1	-1.05183	3.09855	-10.9467	2.06032e-05	NA
Fabp5	-1.05177	5.71421	-4.01397	0.00599876	NA
Aard	-1.0511	0.66713	-3.84042	0.0074062	NA
Nefl	-1.04228	4.04353	-5.58105	0.00109033	LEIN_NEURON_MARKERS,Axon_guidance,Developmental_Biology,Gastrin-CREB_signalling_pathway_via_PKC_and_MAPK,Interleukin-3_5_and_GM-CSF_signaling,MAPK1MAPK3_signaling,MAPK_family_signaling_cascades,Neuronal_System,Neurotransmitter_Receptor_Binding_And_Downstream_Transmission,Transmission_across_Chemical_Synapses
Mlf1	-1.03708	-0.430963	-4.85292	0.00230731	NA
Serpinb6b	-1.0353	0.765615	-4.24536	0.00456143	NA
Meis2	-1.03403	1.56532	-5.75157	0.000923768	NA
Raet1c	-1.02171	2.18229	-4.83089	0.00236286	NA
Wls	-1.01866	3.85944	-4.51382	0.00335307	NA
Gsto1	-1.01252	6.64425	-16.3848	1.64598e-06	NA
Gm13227	-1.00877	0.266217	-4.12546	0.00525174	NA
Itgal	-1.00615	1.2777	-6.70743	0.000387826	NA
Kng2	-1.00093	-0.428055	-3.98736	0.00619393	Gastrin-CREB_signalling_pathway_via_PKC_and_MAPK
Nlrp4f	-0.998028	4.2151	-14.459	3.62642e-06	NA
Sfrp2	-0.994907	1.88415	-4.58082	0.00311028	NA
Clip3	-0.994658	1.18062	-6.2066	0.000603541	NA
9030418K01Rik	-0.992227	0.635426	-3.94459	0.00652253	NA
Ntn1	-0.988073	6.6531	-15.3559	2.48092e-06	Axon_guidance,Developmental_Biology
Mfsd1	-0.985268	7.06458	-12.1171	1.09714e-05	NA
Stk30	-0.984874	3.4766	-10.4222	2.78835e-05	NA
Fam198b	-0.984538	1.31837	-4.30045	0.00427853	NA
Ccdc30	-0.979321	1.43561	-4.90518	0.00218129	NA
Bche	-0.975988	3.01722	-8.63389	8.76524e-05	Neuronal_System,Transmission_across_Chemical_Synapses
Nudt10	-0.975462	0.256211	-4.87619	0.00225021	NA
Kiss1	-0.975258	0.291893	-4.02622	0.00591117	Gastrin-CREB_signalling_pathway_via_PKC_and_MAPK
Msc	-0.973062	4.38893	-4.42464	0.0037096	NA
Apold1	-0.972717	0.667684	-4.35733	0.00400672	NA
Gm13228	-0.971957	-0.452479	-3.76352	0.00814318	NA
B3galnt1	-0.971702	1.30758	-5.50488	0.00117549	NA
Acsf2	-0.971666	2.87319	-7.4201	0.000215688	NA
Ugt8a	-0.97086	3.30286	-8.40091	0.00010329	NA
Samd9l	-0.970675	2.31358	-8.14074	0.000124651	NA
Gnal	-0.963068	0.590949	-4.32805	0.00414418	Neuronal_System,Neurotransmitter_Receptor_Binding_And_Downstream_Transmission,Transmission_across_Chemical_Synapses
Tnfrsf19	-0.959913	4.26982	-9.47312	5.00067e-05	NA
Glod5	-0.958075	0.482026	-4.54346	0.00324313	NA
Mex3b	-0.951622	3.42295	-4.55354	0.00320669	NA
AK129341	-0.951348	2.22935	-7.40963	0.000217482	NA
Casp8	-0.950695	0.282776	-4.4392	0.0036486	NA
Dlgap1	-0.950549	1.66855	-6.13837	0.000642357	NA
Basp1	-0.947287	3.94459	-5.75456	0.000921111	NA
Pygl	-0.946884	0.655788	-3.63137	0.00960523	NA
Zfp951	-0.945651	4.13055	-6.51599	0.000457841	NA
6330439K17Rik	-0.944223	-0.220583	-3.8579	0.00724917	NA
Zmiz1	-0.934192	0.113092	-3.64531	0.00943816	NA
Gm13147	-0.933638	5.17433	-12.2644	1.01756e-05	NA
Celf4	-0.932231	2.40532	-7.11443	0.000275807	NA
Snap91	-0.927958	1.08757	-6.03049	0.000709634	NA
Gm13154	-0.92367	5.69225	-5.84716	0.000843071	NA
Nkx6-3	-0.921989	3.42486	-4.22064	0.0046951	NA
Vasn	-0.921481	0.6893	-5.52911	0.00114762	NA
Zcchc24	-0.911761	2.55438	-7.00586	0.000301597	NA
Car2	-0.909938	2.96413	-8.00908	0.000137358	NA
Rnf130	-0.909547	2.92666	-3.68315	0.00900057	NA
Gulp1	-0.907463	2.5999	-5.12546	0.00172858	NA
Ankrd45	-0.905834	1.43311	-4.89131	0.00221396	NA
Cisd3	-0.905626	4.15312	-10.1126	3.35554e-05	NA
Syce1	-0.905151	3.4589	-8.53039	9.42389e-05	NA
Zeb1	-0.897639	3.5632	-9.07037	6.50939e-05	NA
Nucb2	-0.891154	1.74913	-4.01783	0.00597098	NA
Gm16629	-0.888609	0.132448	-4.08058	0.00553931	NA
Gm16627	-0.888246	0.001657	-3.72606	0.00853109	NA
Dlg4	-0.886879	0.279621	-3.9118	0.00678745	Axon_guidance,Developmental_Biology,Gastrin-CREB_signalling_pathway_via_PKC_and_MAPK,Interleukin-3_5_and_GM-CSF_signaling,L1CAM_interactions,MAPK1MAPK3_signaling,MAPK_family_signaling_cascades,Neuronal_System,Neurotransmitter_Receptor_Binding_And_Downstream_Transmission,Transmission_across_Chemical_Synapses
Pirt	-0.88457	3.34684	-8.82928	7.66011e-05	NA
Sept1	-0.880023	5.94962	-5.52702	0.00114998	NA
Nudt11	-0.875086	1.98875	-6.27037	0.000569653	NA
Plekhg1	-0.873706	2.61562	-7.36617	0.000225114	NA
Nup62cl	-0.872644	4.53404	-3.84234	0.0073888	NA
Coil	-0.861173	5.47243	-6.34825	0.000531154	NA
Dirc2	-0.858279	4.81925	-12.9999	7.07238e-06	NA
CT571271.1	-0.855725	1.66385	-4.29867	0.00428735	NA
Scn2b	-0.848993	0.852164	-4.40876	0.00377743	Axon_guidance,Developmental_Biology,L1CAM_interactions
Serpinb1b	-0.845393	0.637483	-4.97437	0.00202615	NA
Lix1l	-0.844671	2.05342	-3.72175	0.00857697	NA
Spin2	-0.844369	1.1544	-3.99588	0.00613068	NA
Prrc1	-0.843009	6.22655	-14.7829	3.15395e-06	NA
Nmb	-0.842917	0.296413	-3.85091	0.00731151	Gastrin-CREB_signalling_pathway_via_PKC_and_MAPK
Gm13230	-0.840057	3.94917	-7.73629	0.000168687	NA
Igfbp2	-0.838687	7.2621	-3.95615	0.0064318	NA
Ptbp2	-0.838317	5.3882	-7.64103	0.000181491	NA
Rab17	-0.835963	2.15013	-6.83897	0.000346767	NA
Gabrb3	-0.826815	2.15352	-4.527	0.00330369	Neuronal_System,Neurotransmitter_Receptor_Binding_And_Downstream_Transmission,Transmission_across_Chemical_Synapses
Egfr	-0.824121	1.04797	-3.65139	0.00936628	Axon_guidance,Developmental_Biology,Gastrin-CREB_signalling_pathway_via_PKC_and_MAPK,Interleukin-3_5_and_GM-CSF_signaling,L1CAM_interactions,MAPK1MAPK3_signaling,MAPK_family_signaling_cascades
Mpdz	-0.823761	3.23829	-8.37286	0.00010538	NA
Fgf17	-0.823187	3.33012	-6.47993	0.000472576	Axon_guidance,Developmental_Biology,Gastrin-CREB_signalling_pathway_via_PKC_and_MAPK,Interleukin-3_5_and_GM-CSF_signaling,MAPK1MAPK3_signaling,MAPK_family_signaling_cascades
Gm9766	-0.817302	0.93073	-3.77138	0.00806429	NA
Fstl1	-0.816942	4.8357	-6.78566	0.000362782	NA
Gpr125	-0.816752	5.93982	-14.6192	3.38324e-06	NA
Gpr85	-0.814	0.999442	-3.73412	0.008446	NA
Vax2	-0.812104	2.46442	-5.24891	0.00152163	NA
Mxd4	-0.800149	1.13674	-4.77784	0.00250286	NA
Htra1	-0.799866	4.06493	-9.66483	4.42605e-05	NA
Sept6	-0.799359	3.0349	-4.0587	0.00568577	NA
Rnf113a1	-0.798223	1.8962	-6.45873	0.000481493	NA
Stk36	-0.79671	2.64551	-4.5685	0.00315342	NA
2610019F03Rik	-0.794866	5.93198	-12.8175	7.72598e-06	NA
CAAA01202134.1.17058.1	-0.790743	1.1226	-3.94388	0.00652814	NA
Gm12655	-0.790375	0.88951	-4.29082	0.00432655	NA
Sod2	-0.786332	7.88823	-7.03501	0.000294411	NA
Crisp1	-0.784381	3.28196	-6.04795	0.000698218	NA
Socs3	-0.783772	6.26605	-10.72	2.3443e-05	NA
H2-M6-ps	-0.781132	3.79641	-9.05896	6.55921e-05	NA
Tagln3	-0.776308	1.35727	-5.23169	0.00154875	NA
3110003A17Rik	-0.775116	3.68644	-7.13553	0.000271094	NA
Cxadr	-0.775028	5.67428	-4.62863	0.00294902	NA
Col2a1	-0.769647	1.9435	-4.03715	0.00583427	NA
Itga9	-0.769314	2.22938	-5.14155	0.00169989	Axon_guidance,Developmental_Biology,L1CAM_interactions
Ttc32	-0.767989	1.78057	-5.1052	0.00176548	NA
Sfmbt2	-0.767715	5.31209	-5.9245	0.000783593	NA
Pkig	-0.765095	2.40005	-6.08884	0.000672304	NA
Cds2	-0.764487	7.34764	-10.9863	2.01488e-05	NA
Atf7ip2	-0.760751	3.25478	-5.06406	0.00184315	NA
Atp8b2	-0.760452	7.85986	-7.07369	0.000285178	NA
Sms	-0.759633	5.31746	-4.04458	0.00578258	NA
Acox3	-0.759265	5.67475	-9.76504	4.15601e-05	NA
Neto2	-0.754754	2.31394	-5.88301	0.000814894	NA
Six1	-0.752904	2.10608	-5.47159	0.00121504	NA
2810417H13Rik	-0.751815	5.52922	-4.02305	0.00593369	NA
Ppm1e	-0.750272	0.00941986	-3.62842	0.009641	NA
H2-Q4	-0.74865	1.57364	-4.43688	0.00365828	NA
Zfp57	-0.746778	7.69013	-12.7324	8.05466e-06	NA
Jam2	-0.744811	7.56034	-15.3285	2.5091e-06	NA
Ugdh	-0.744133	6.02335	-12.7538	7.97039e-06	NA
Pea15a	-0.743933	1.3862	-4.66169	0.00284298	Axon_guidance,Developmental_Biology,Gastrin-CREB_signalling_pathway_via_PKC_and_MAPK,Interleukin-3_5_and_GM-CSF_signaling,MAPK1MAPK3_signaling,MAPK_family_signaling_cascades
Kctd21	-0.742258	0.656059	-3.63223	0.00959473	NA
Zfp711	-0.740613	2.91551	-6.52113	0.000455782	NA
Il6ra	-0.738725	2.94149	-6.56017	0.000440488	MAPK1MAPK3_signaling,MAPK_family_signaling_cascades
Efnb1	-0.737296	0.725197	-3.84941	0.00732498	Axon_guidance,Developmental_Biology
Srgap3	-0.73265	2.11385	-3.61563	0.00979764	Axon_guidance,Developmental_Biology
Uprt	-0.731077	1.05931	-4.27424	0.00441063	NA
Gli2	-0.72691	4.92536	-8.92462	7.17927e-05	NA
Zrsr1	-0.720945	3.78837	-6.56004	0.000440542	NA
Schip1	-0.719299	6.35016	-14.0461	4.35183e-06	NA
Ecm1	-0.718534	0.475083	-3.63226	0.00959446	NA
Ccdc73	-0.715946	1.57636	-4.60594	0.00302437	NA
Id4	-0.71013	4.41811	-4.88494	0.00222916	NA
Ube2e2	-0.709588	2.73511	-6.63446	0.000412972	NA
Frmd6	-0.707745	6.04538	-13.2755	6.20171e-06	NA
A930011O12Rik	-0.705445	2.0076	-3.76754	0.00810275	NA
Sorl1	-0.70423	6.87011	-5.96804	0.000752202	NA
Stmn2	-0.702941	6.951	-7.88022	0.000151245	NA
Glb1l	-0.697951	3.1308	-5.24945	0.00152079	NA
Gm16211	-0.697626	1.48383	-4.18054	0.00492119	NA
Lpar6	-0.697452	3.98274	-6.17302	0.000622304	Gastrin-CREB_signalling_pathway_via_PKC_and_MAPK
Rrm2b	-0.693626	4.88956	-4.34416	0.00406793	NA
Dzip1l	-0.69158	2.38971	-5.12629	0.00172709	NA
Zfp300	-0.690986	1.43109	-4.14553	0.00512852	NA
Efnb2	-0.689406	1.59628	-4.14365	0.00513995	Axon_guidance,Developmental_Biology
Ctbp2	-0.685066	7.18087	-4.90961	0.00217097	NA
Col11a1	-0.679743	3.72666	-4.2505	0.00453421	NA
Bambi	-0.674242	3.36744	-6.70847	0.000387479	NA
Zswim6	-0.673137	2.808	-3.74957	0.00828532	NA
Pim2	-0.672465	2.91724	-6.69674	0.000391399	NA
Ccdc46	-0.670738	0.210753	-3.71286	0.00867264	NA
Ccnd1	-0.667139	7.26144	-6.13753	0.000642849	NA
Unc13b	-0.666744	5.28306	-11.2887	1.70331e-05	Neuronal_System,Transmission_across_Chemical_Synapses
Endod1	-0.661934	2.17476	-4.91141	0.00216679	NA
Gm13241	-0.66092	1.13801	-4.35797	0.00400379	NA
Ddc	-0.658436	5.11551	-6.37222	0.000519905	NA
Rab7l1	-0.657921	2.26815	-5.55835	0.00111496	NA
Elk3	-0.656455	2.91899	-4.07913	0.00554886	NA
Ly75	-0.654622	7.71317	-4.54716	0.0032297	NA
Tnfrsf8	-0.649554	3.7868	-5.43628	0.00125864	NA
Dazl	-0.648552	3.37815	-6.1933	0.000610894	NA
Rsph1	-0.647762	1.76196	-4.3559	0.00401333	NA
6430527G18Rik	-0.643719	6.14842	-7.43083	0.000213866	NA
Dsel	-0.641123	3.79884	-5.49144	0.00119128	NA
Armcx2	-0.637006	3.97357	-5.26117	0.00150266	NA
Lxn	-0.633057	2.24163	-4.77469	0.00251145	NA
Gm9833	-0.632901	4.76133	-4.85298	0.00230715	NA
Chrna7	-0.63125	2.00416	-3.99582	0.0061311	Neuronal_System,Neurotransmitter_Receptor_Binding_And_Downstream_Transmission,Transmission_across_Chemical_Synapses
Igfbp3	-0.631029	3.89281	-7.58579	0.000189422	NA
Chka	-0.625662	5.22523	-6.94188	0.000318073	NA
Apcdd1	-0.624684	2.52595	-4.86975	0.00226586	NA
D1Ertd622e	-0.621583	2.9138	-3.98801	0.00618904	NA
Slc30a1	-0.620189	5.54762	-7.4742	0.000206681	NA
Armcx1	-0.616933	4.21398	-5.31195	0.00142681	NA
Fut10	-0.612764	3.74684	-4.46792	0.00353154	NA
Tpbg	-0.609858	5.01779	-4.91093	0.0021679	NA
Rcor2	-0.605623	6.29939	-8.51194	9.54714e-05	NA
Nid1	-0.59828	7.54767	-7.73069	0.00016941	NA
Mcts2	-0.596992	3.7326	-5.32186	0.00141251	NA
Sp5	-0.596485	3.18496	-4.09375	0.00545317	NA
Pls3	-0.594411	6.59036	-7.86093	0.000153459	NA
Mcc	-0.591851	3.14552	-5.43093	0.0012654	NA
Rnpep	-0.588157	4.82442	-5.67256	0.00099708	NA
Slc25a20	-0.587504	5.8659	-6.98928	0.000305769	NA
2310079F23Rik	-0.586964	5.49572	-5.20011	0.00159992	NA
AC125484.1	-0.586613	1.27097	-3.67237	0.00912292	NA
AC161763.1	-0.586366	2.21582	-3.90353	0.00685613	NA
Bcas3	-0.584254	5.66899	-10.9744	2.02839e-05	NA
Arl4a	-0.581665	4.62049	-4.81563	0.00240221	NA
Nbea	-0.581051	3.35872	-5.18931	0.00161785	NA

## Sheet: Neural up in Elmsan1 KO vs WT
Gene	log2FC	AveExpr	T.Value	P.Value	Reactome
Cntn2	1.41933	0.859779	4.33335	0.00411889	NA
Cntnap2	1.38601	2.79983	3.61759	0.00977351	NA
Pvrl1	0.94708	3.61308	3.90541	0.00684049	Cell-cell_junction_organization,Cell_junction_organization
Galr2	0.924305	0.0802031	3.63512	0.00955997	NA
Plxna1	0.907516	6.80351	7.48761	0.000204514	NA
Ephb2	0.867435	3.97706	6.19982	0.000607278	NA
Csnk1e	0.788455	5.55131	7.15363	0.000267122	NA
Btg2	0.765422	6.19538	3.76355	0.00814291	NA
Eomes	0.726458	3.43507	7.0192	0.000298284	NA
Sdc4	0.723797	8.1289	10.9203	2.09125e-05	NA
Notch3	0.710556	5.14002	5.51923	0.00115889	NA
Fry	0.680896	5.41359	6.11593	0.00065573	NA
Lamb2	0.659412	6.15468	9.52188	4.84682e-05	NA
Nr2f6	0.646818	4.62754	4.75706	0.00256022	NA
Dpysl2	0.63644	5.95588	8.90078	7.29619e-05	NA
Casp3	0.63249	6.17557	10.4688	2.71292e-05	Apoptotic_cleavage_of_cellular_proteins,Caspase-mediated_cleavage_of_cytoskeletal_proteins,Signaling_by_Interleukins,Signalling_by_NGF
Epha4	0.630099	7.28375	3.67577	0.00908419	NA
Cdh1	0.624195	9.25528	11.1226	1.86701e-05	Apoptotic_cleavage_of_cellular_proteins,Cell-cell_junction_organization,Cell_junction_organization
Wnk1	0.584318	7.99603	10.7842	2.25963e-05	NA

[truncated: 1 more sheets: Neural down in Elmsan1 KO vs WT]
