# Supplementary material for: The histone deacetylase complex MiDAC regulates a neurodevelopmental gene expression program to control neurite outgrowth
Source: eLife. 2020 Apr 16;9:e57519. doi: 10.7554/eLife.57519 (PMC7192582; doi:10.7554/eLife.57519)
Supplement: Supplementary file 3. [file elife-57519-supp3.xlsx]

## Sheet: Dnttip1 Binding Sites
Chr	Start	End	Distance to TSS	RefSeqID	Annotation	Gene
chr1	3052559	3053287	608656	NM_001011874	Intergenic	Xkr4
chr1	3333702	3333947	327754	NM_001011874	intron	Xkr4
chr1	3450861	3451142	210577	NM_001011874	intron	Xkr4
chr1	3472908	3473534	188358	NM_001011874	intron	Xkr4
chr1	3639076	3639404	22339	NM_001011874	intron	Xkr4
chr1	3660518	3661235	702	NM_001011874	exon	Xkr4
chr1	3671589	3671987	-10209	NM_001011874	Intergenic	Xkr4
chr1	3943653	3943999	-282247	NM_001011874	Intergenic	Xkr4
chr1	3972015	3972446	-310652	NM_001011874	Intergenic	Xkr4
chr1	4126503	4126932	223677	NM_011283	Intergenic	Rp1
chr1	4140876	4141308	209303	NM_011283	Intergenic	Rp1
chr1	4481918	4482159	5396	NM_001289464	exon	Sox17
chr1	4482378	4482904	4794	NM_001289464	exon	Sox17
chr1	4483409	4483649	3906	NM_001289464	5'UTR	Sox17
chr1	4534129	4534671	-46965	NM_001289465	Intergenic	Sox17
chr1	4561508	4562361	-74500	NM_001289465	Intergenic	Sox17
chr1	4588503	4588889	-101261	NM_001289465	Intergenic	Sox17
chr1	4650268	4650618	125364	NR_033530	Intergenic	Mrpl15
chr1	4678782	4679029	96901	NR_033530	Intergenic	Mrpl15
chr1	4712627	4713066	62960	NR_033530	Intergenic	Mrpl15
chr1	4775358	4776134	61	NR_033530	promoter-TSS	Mrpl15
chr1	4792555	4793386	-5003	NM_008866	Intergenic	Lypla1
chr1	4797230	4798485	-116	NM_008866	promoter-TSS	Lypla1
chr1	4799917	4801011	2490	NM_008866	intron	Lypla1
chr1	4809487	4810094	11817	NM_008866	intron	Lypla1
chr1	4816138	4816378	18284	NM_008866	intron	Lypla1
chr1	4845179	4846787	-1792	NM_001159750	Intergenic	Tcea1
chr1	4847096	4847344	-555	NM_001159750	promoter-TSS	Tcea1
chr1	4847508	4848775	-267	NM_001159751	promoter-TSS	Tcea1
chr1	4962340	4962801	46244	NM_001290372	intron	Rgs20
chr1	4967905	4968355	40685	NM_001290372	intron	Rgs20
chr1	5073144	5073784	297	NM_001310442	intron	Atp6v1h
chr1	5124667	5125173	51753	NM_001310442	intron	Atp6v1h
chr1	5127170	5127425	54131	NM_001310442	intron	Atp6v1h
chr1	5217983	5218246	144948	NM_001310442	Intergenic	Atp6v1h
chr1	5222208	5222802	149338	NM_001310442	Intergenic	Atp6v1h
chr1	5222929	5223331	149963	NM_001310442	Intergenic	Atp6v1h
chr1	5251163	5251901	178365	NM_001310442	Intergenic	Atp6v1h
chr1	5768770	5769010	138589	NM_010342	Intergenic	Npbwr1
chr1	6049168	6049618	-141914	NM_010342	Intergenic	Npbwr1
chr1	6107665	6108014	-96903	NM_009826	Intergenic	Rb1cc1
chr1	6132734	6133259	-71746	NM_009826	Intergenic	Rb1cc1
chr1	6204117	6205079	-145	NM_009826	promoter-TSS	Rb1cc1
chr1	6272338	6272759	67806	NM_009826	Intergenic	Rb1cc1
chr1	6437970	6439575	-38539	NM_001244693	Intergenic	St18
chr1	6447975	6448713	-28968	NM_001244693	Intergenic	St18
chr1	6719366	6719676	-611	NR_045189	promoter-TSS	St18
chr1	6888287	6888527	168275	NR_045188	Intergenic	St18
chr1	6921035	6921280	-157843	NM_183028	Intergenic	Pcmtd1
chr1	6980030	6980701	-98635	NM_183028	Intergenic	Pcmtd1
chr1	7002572	7003070	-76180	NM_183028	Intergenic	Pcmtd1
chr1	7010744	7011013	-68122	NM_183028	Intergenic	Pcmtd1
chr1	7037298	7037856	-41424	NM_183028	Intergenic	Pcmtd1
chr1	7078334	7079968	150	NM_183028	5'UTR	Pcmtd1
chr1	7082487	7082733	3609	NM_183028	intron	Pcmtd1
chr1	7095892	7096140	17015	NM_183028	intron	Pcmtd1
chr1	7114648	7115699	36173	NM_183028	intron	Pcmtd1
chr1	7115910	7116892	37400	NM_183028	intron	Pcmtd1
chr1	7119975	7120244	41109	NM_183028	intron	Pcmtd1
chr1	7196595	7197635	118114	NM_183028	Intergenic	Pcmtd1
chr1	7288003	7288347	209174	NM_183028	Intergenic	Pcmtd1
chr1	7303470	7303937	224703	NM_183028	Intergenic	Pcmtd1
chr1	7309392	7309743	230567	NM_183028	Intergenic	Pcmtd1
chr1	7387695	7388070	308882	NM_183028	Intergenic	Pcmtd1
chr1	7508926	7509204	430064	NM_183028	Intergenic	Pcmtd1
chr1	7523521	7523841	444680	NM_183028	Intergenic	Pcmtd1
chr1	7576499	7576975	497736	NM_183028	Intergenic	Pcmtd1
chr1	7581318	7581751	502534	NM_183028	Intergenic	Pcmtd1
chr1	7661418	7662401	582909	NM_183028	Intergenic	Pcmtd1
chr1	7722711	7723216	643963	NM_183028	Intergenic	Pcmtd1
chr1	8486296	8486707	803456	NM_001290390	intron	Sntg1
chr1	8571384	8572964	717784	NM_001290390	intron	Sntg1
chr1	8573135	8573412	716684	NM_001290390	intron	Sntg1
chr1	8615640	8616062	674107	NM_001290390	intron	Sntg1
chr1	8925694	8927397	363412	NM_001290390	intron	Sntg1
chr1	8927985	8929708	361111	NM_001290390	intron	Sntg1
chr1	8930075	8932250	358795	NM_001290390	intron	Sntg1
chr1	9289668	9290095	76	NM_001290390	promoter-TSS	Sntg1
chr1	9432926	9433470	-102291	NM_021511	Intergenic	Rrs1
chr1	9459904	9461092	-74991	NM_021511	Intergenic	Rrs1
chr1	9525560	9526232	-9593	NM_021511	Intergenic	Rrs1
chr1	9535194	9536268	242	NM_021511	exon	Rrs1
chr1	9537094	9537341	-909	NM_175236	promoter-TSS	Adhfe1
chr1	9537689	9538707	71	NR_027664	promoter-TSS	Adhfe1
chr1	9562048	9562639	24217	NR_027664	intron	Adhfe1
chr1	9639390	9639748	-18396	NR_015470	Intergenic	2610203C22Rik
chr1	9689793	9691452	-333	NM_008651	promoter-TSS	Mybl1
chr1	9691985	9692688	-2047	NM_008651	Intergenic	Mybl1
chr1	9738425	9738778	-139	NM_173443	promoter-TSS	Vcpip1
chr1	9745792	9746055	-7461	NM_173443	intron	Vcpip1
chr1	9758792	9759175	-20521	NM_173443	intron	Vcpip1
chr1	9838043	9838785	52	NM_001037759	promoter-TSS	Sgk3
chr1	9879682	9880241	-18757	NM_177722	intron	Mcmdc2
chr1	9899153	9899530	623	NM_177722	intron	Mcmdc2
chr1	9932873	9933461	-543	NR_004410	promoter-TSS	Snord87
chr1	9933666	9934375	178	NR_024067	intron	Snhg6
chr1	9941566	9942889	-8029	NR_024067	Intergenic	Snhg6
chr1	9943041	9943919	-9281	NR_024067	Intergenic	Snhg6
chr1	9957221	9958356	-223	NM_001285425	promoter-TSS	Tcf24
chr1	9998941	9999556	-32	NM_145692	promoter-TSS	Ppp1r42
chr1	10021436	10022417	6313	NR_102282	intron	Cops5
chr1	10027620	10028103	378	NR_102282	promoter-TSS	Cops5
chr1	10029499	10030490	1696	NM_026493	intron	Cspp1
chr1	10075835	10076262	47750	NM_026493	intron	Cspp1
chr1	10216984	10217229	5644	NM_001102430	intron	Arfgef1
chr1	10222491	10223501	-245	NM_001102430	promoter-TSS	Arfgef1
chr1	10370895	10371241	-148317	NM_001102430	intron	Arfgef1
chr1	10385625	10386021	-163072	NM_001102430	intron	Arfgef1
chr1	10466838	10467326	242944	NM_001289497	intron	Cpa6
chr1	10868182	10868986	-114962	NM_029525	Intergenic	Prex2
chr1	10869923	10870793	-113188	NM_029525	Intergenic	Prex2
chr1	11014605	11015048	31281	NM_029525	intron	Prex2
chr1	11087441	11087693	104021	NM_029525	intron	Prex2
chr1	11139475	11139804	-114404	NM_001033636	intron	Prex2
chr1	11141336	11141621	-112565	NM_001033636	intron	Prex2
chr1	11241062	11241625	-12700	NM_001033636	intron	Prex2
chr1	11267658	11268607	14089	NM_001033636	intron	Prex2
chr1	11319483	11321003	66199	NM_001033636	Intergenic	Prex2
chr1	11385627	11386797	-17974	NM_001310451	Intergenic	A830018L16Rik
chr1	11391139	11391770	-12731	NM_001310451	Intergenic	A830018L16Rik
chr1	11403707	11404714	25	NM_001160371	promoter-TSS	A830018L16Rik
chr1	11413894	11414147	9835	NM_001160371	intron	A830018L16Rik
chr1	11417316	11418023	13484	NM_001160371	intron	A830018L16Rik
chr1	11456881	11457752	53131	NM_001160371	intron	A830018L16Rik
chr1	11491610	11492208	87723	NM_001160371	intron	A830018L16Rik
chr1	11738477	11738915	334510	NM_001160371	intron	A830018L16Rik
chr1	12010626	12011140	-405184	NR_105759	Intergenic	Mir6341
chr1	12015846	12016307	-399990	NR_105759	Intergenic	Mir6341
chr1	12116673	12117095	-299183	NR_105759	Intergenic	Mir6341
chr1	12286012	12286411	-129855	NR_105759	Intergenic	Mir6341
chr1	12362864	12363430	-52920	NR_105759	Intergenic	Mir6341
chr1	12603935	12604177	-53588	NR_045297	Intergenic	Gm17644
chr1	12681140	12681546	-1168	NM_001198565	Intergenic	Sulf1
chr1	12682014	12682582	-213	NM_001198565	promoter-TSS	Sulf1
chr1	12708114	12709235	49	NM_172294	promoter-TSS	Sulf1
chr1	12734406	12735371	26263	NM_172294	intron	Sulf1
chr1	12743957	12744488	35597	NM_172294	intron	Sulf1
chr1	12753255	12753658	44831	NM_172294	intron	Sulf1
chr1	12771997	12772721	63733	NM_172294	intron	Sulf1
chr1	12797358	12797617	88862	NM_172294	intron	Sulf1
chr1	12804665	12804966	96190	NM_172294	intron	Sulf1
chr1	12826028	12826490	117633	NM_172294	exon	Sulf1
chr1	12876706	12877066	104330	NM_172841	intron	Slco5a1
chr1	12920893	12921138	60200	NM_172841	intron	Slco5a1
chr1	12939857	12940254	41160	NM_172841	intron	Slco5a1
chr1	12944314	12944559	36779	NM_172841	intron	Slco5a1
chr1	12980244	12981576	306	NM_172841	5'UTR	Slco5a1
chr1	12982718	12983085	-1686	NM_172841	Intergenic	Slco5a1
chr1	12987334	12988410	-6656	NM_172841	Intergenic	Slco5a1
chr1	13005565	13006408	-24771	NM_172841	Intergenic	Slco5a1
chr1	13042139	13042610	-61159	NM_172841	Intergenic	Slco5a1
chr1	13047892	13048213	-66837	NM_172841	Intergenic	Slco5a1
chr1	13049659	13050344	67242	NM_001081209	Intergenic	Prdm14
chr1	13060222	13060531	56867	NM_001081209	Intergenic	Prdm14
chr1	13061066	13061830	55796	NM_001081209	Intergenic	Prdm14
chr1	13063515	13065756	52608	NM_001081209	Intergenic	Prdm14
chr1	13066250	13067192	50523	NM_001081209	Intergenic	Prdm14
chr1	13068330	13068612	48773	NM_001081209	Intergenic	Prdm14
chr1	13069771	13070011	47353	NM_001081209	Intergenic	Prdm14
chr1	13070878	13071216	46197	NM_001081209	Intergenic	Prdm14
chr1	13073533	13074008	43473	NM_001081209	Intergenic	Prdm14
chr1	13074148	13074398	42971	NM_001081209	Intergenic	Prdm14
chr1	13074504	13075790	42097	NM_001081209	Intergenic	Prdm14
chr1	13084370	13086697	31710	NM_001081209	Intergenic	Prdm14
chr1	13090835	13091562	26045	NM_001081209	Intergenic	Prdm14
chr1	13093595	13094689	23102	NM_001081209	Intergenic	Prdm14
chr1	13094817	13095521	22075	NM_001081209	Intergenic	Prdm14
chr1	13098596	13098842	18525	NM_001081209	Intergenic	Prdm14
chr1	13109884	13110131	7236	NM_001081209	intron	Prdm14
chr1	13114167	13114407	2957	NM_001081209	intron	Prdm14
chr1	13115640	13116846	1001	NM_001081209	intron	Prdm14
chr1	13116965	13119077	-777	NM_001081209	promoter-TSS	Prdm14
chr1	13121495	13122767	-4887	NM_001081209	Intergenic	Prdm14
chr1	13132409	13133061	-15491	NM_001081209	3'UTR	Prdm14
chr1	13136368	13136920	-19400	NM_001081209	intron	Prdm14
chr1	13187194	13187484	-70095	NM_001081209	intron	Prdm14
chr1	13206160	13206987	-89330	NM_001081209	intron	Prdm14
chr1	13243325	13243956	118869	NM_001302702	intron	Ncoa2
chr1	13266933	13267442	95322	NM_001302702	intron	Ncoa2
chr1	13287450	13288171	74699	NM_001302702	intron	Ncoa2
chr1	13362730	13365076	261	NM_008678	intron	Ncoa2
chr1	13445710	13446071	-81727	NM_008678	Intergenic	Ncoa2
chr1	13457916	13458330	-93959	NM_008678	Intergenic	Ncoa2
chr1	13484872	13485117	94996	NM_028173	Intergenic	Tram1
chr1	13496879	13498138	82482	NM_028173	Intergenic	Tram1
chr1	13521566	13521818	58299	NM_028173	Intergenic	Tram1
chr1	13525015	13525444	54761	NM_028173	Intergenic	Tram1
chr1	13579477	13580364	70	NM_028173	promoter-TSS	Tram1
chr1	13607328	13607594	-27470	NM_028173	Intergenic	Tram1
chr1	13649505	13651404	135	NM_145381	exon	Lactb2
chr1	13761732	13762326	14981	NR_004447	Intergenic	Gm5523
chr1	13836524	13837025	-59765	NR_004447	Intergenic	Gm5523
chr1	13991027	13991548	-214278	NR_004447	Intergenic	Gm5523
chr1	14017106	14017351	-240219	NR_004447	Intergenic	Gm5523
chr1	14085623	14085929	214504	NM_001310459	Intergenic	Eya1
chr1	14130039	14130300	170110	NM_001310459	Intergenic	Eya1
chr1	14152138	14152378	148022	NM_001310459	Intergenic	Eya1
chr1	14155193	14155515	144926	NM_001310459	Intergenic	Eya1
chr1	14171727	14172193	128320	NM_001310459	intron	Eya1
chr1	14176301	14177143	123558	NM_001310459	intron	Eya1
chr1	14215538	14216126	84448	NM_001310459	intron	Eya1
chr1	14281807	14282082	18335	NM_001310459	intron	Eya1
chr1	14282206	14283001	17676	NM_001310459	intron	Eya1
chr1	14284220	14284948	15696	NM_001310459	intron	Eya1
chr1	14294632	14295198	5365	NM_001310459	intron	Eya1
chr1	14299927	14300476	78	NM_001310459	promoter-TSS	Eya1
chr1	14302409	14303031	-2440	NM_010164	Intergenic	Eya1
chr1	14411025	14411527	-110996	NM_010164	Intergenic	Eya1
chr1	14481014	14481464	-180959	NM_010164	Intergenic	Eya1
chr1	14621530	14622546	124009	NM_010827	Intergenic	Msc
chr1	14640518	14640820	105378	NM_010827	Intergenic	Msc
chr1	14695532	14696084	50239	NM_010827	Intergenic	Msc
chr1	14696281	14696553	49630	NM_010827	Intergenic	Msc
chr1	14729864	14730301	15964	NM_010827	Intergenic	Msc
chr1	14732653	14734136	12652	NM_010827	Intergenic	Msc
chr1	14745120	14746455	259	NM_010827	exon	Msc
chr1	14746632	14747653	-1096	NM_010827	Intergenic	Msc
chr1	14908453	14909190	121	NM_177781	exon	Trpa1
chr1	15019683	15019933	-110865	NM_177781	Intergenic	Trpa1
chr1	15276633	15276939	-25747	NM_001098528	Intergenic	Kcnb2
chr1	15639824	15640301	-155664	NM_009352	intron	Terf1
chr1	15642666	15642922	-152933	NM_009352	intron	Terf1
chr1	15742757	15743010	-52843	NM_009352	Intergenic	Terf1
chr1	15760890	15761225	-34669	NM_009352	Intergenic	Terf1
chr1	15781143	15782318	-13996	NM_009352	Intergenic	Terf1
chr1	15795946	15796263	378	NM_001286628	intron	Terf1
chr1	15805169	15805611	9663	NM_001286628	intron	Terf1
chr1	15898684	15899057	-16068	NM_001033288	Intergenic	Sbspon
chr1	16094526	16095932	-715	NM_011291	promoter-TSS	Rpl7
chr1	16109714	16110004	13896	NM_133832	intron	Rdh10
chr1	16119869	16120851	24397	NM_133832	intron	Rdh10
chr1	16167745	16168107	71963	NM_133832	Intergenic	Rdh10
chr1	16258791	16259113	162989	NM_133832	intron	Rdh10
chr1	16508790	16509269	353	NM_025303	intron	Stau2
chr1	16608985	16609681	86	NM_025773	promoter-TSS	Ube2w
chr1	16640493	16640738	6330	NM_026456	intron	Eloc
chr1	16645012	16645257	1811	NM_026456	intron	Eloc
chr1	16646573	16647049	135	NM_026456	promoter-TSS	Eloc
chr1	16655005	16656035	248	NM_026392	exon	Tmem70
chr1	16677306	16677920	-924	NM_001159711	promoter-TSS	Ly96
chr1	16678573	16678979	239	NM_016923	intron	Ly96
chr1	16814014	16815234	136087	NM_016923	Intergenic	Ly96
chr1	16858550	16859199	180338	NM_016923	Intergenic	Ly96
chr1	17135291	17135736	60	NM_010267	promoter-TSS	Gdap1
chr1	17197450	17198169	62356	NM_010267	Intergenic	Gdap1
chr1	17240415	17241569	105538	NM_010267	Intergenic	Gdap1
chr1	17676988	17677436	-40286	NM_031402	intron	Crispld1
chr1	17717295	17717955	102	NR_130314	non-coding	Gm16070
chr1	17921934	17922974	204678	NM_030033	Intergenic	Crisp4
chr1	18258995	18259382	-3970	NM_001040027	Intergenic	Defb41
chr1	18277522	18277925	-22505	NM_001040027	Intergenic	Defb41
chr1	18629394	18629976	-374466	NM_001040027	Intergenic	Defb41
chr1	20733675	20734608	13156	NM_010552	Intergenic	Il17a
chr1	20749878	20750810	24007	NM_145856	Intergenic	Il17f
chr1	20751309	20752234	22579	NM_145856	Intergenic	Il17f
chr1	20764124	20764373	10102	NM_145856	Intergenic	Il17f
chr1	20785461	20785701	-11230	NM_145856	Intergenic	Il17f
chr1	20810120	20810607	-70	NM_008563	promoter-TSS	Mcm3
chr1	20857122	20858684	22651	NR_040492	Intergenic	6720483E21Rik
chr1	20860220	20860499	20194	NR_040492	Intergenic	6720483E21Rik
chr1	20876054	20876363	4345	NR_040492	Intergenic	6720483E21Rik
chr1	20879999	20881349	-29	NM_028829	promoter-TSS	Paqr8
chr1	20881841	20882081	1258	NM_028829	intron	Paqr8
chr1	20886129	20887041	5882	NM_028829	intron	Paqr8
chr1	20891969	20892249	11406	NM_028829	intron	Paqr8
chr1	20892471	20892796	11931	NM_028829	intron	Paqr8
chr1	20895793	20896469	15428	NM_028829	intron	Paqr8
chr1	20897907	20899769	18135	NM_028829	intron	Paqr8
chr1	20902405	20903855	22427	NM_028829	intron	Paqr8
chr1	20911063	20911489	-30431	NM_027974	intron	Efhc1
chr1	20941601	20942061	124	NM_027974	exon	Efhc1
chr1	20944918	20945623	3564	NM_027974	intron	Efhc1
chr1	20964687	20965308	23291	NM_027974	exon	Efhc1
chr1	20976114	20976433	34567	NM_027974	intron	Efhc1
chr1	20988219	20988650	46728	NM_027974	Intergenic	Efhc1
chr1	21004568	21004813	62984	NM_027974	intron	Efhc1
chr1	21057710	21057961	11470	NM_177409	intron	Tram2
chr1	21068888	21069936	-106	NM_177409	promoter-TSS	Tram2
chr1	21070098	21070705	-1096	NM_177409	Intergenic	Tram2
chr1	21086937	21087603	-17964	NM_177409	Intergenic	Tram2
chr1	21156496	21157341	-51737	NM_001290679	Intergenic	Tmem14a
chr1	21208695	21209247	315	NM_029398	intron	Tmem14a
chr1	21209375	21209659	861	NM_029398	intron	Tmem14a
chr1	21215710	21216130	7264	NM_029398	intron	Tmem14a
chr1	21221434	21222448	-8725	NM_001288617	Intergenic	Gsta3
chr1	21238093	21238362	7562	NM_010356	intron	Gsta3
chr1	21244060	21244300	13514	NM_010356	intron	Gsta3
chr1	21245886	21246163	15359	NM_010356	intron	Gsta3
chr1	21246290	21247638	16298	NM_010356	intron	Gsta3
chr1	21250068	21250443	19590	NM_010356	exon	Gsta3
chr1	21261134	21261751	26950	NR_002858	Intergenic	Gm4956
chr1	21274505	21274841	13720	NR_002858	TTS	Gm4956
chr1	21294699	21295013	-6463	NR_002858	Intergenic	Gm4956
chr1	21314278	21314690	-25274	NM_183322	Intergenic	Khdc1a
chr1	21706984	21707304	244879	NM_001160139	intron	Kcnq5
chr1	21951009	21951620	708	NM_001160139	exon	Kcnq5
chr1	22089948	22090266	-137376	NM_001310477	Intergenic	Kcnq5
chr1	22090552	22091272	-138181	NM_001310477	Intergenic	Kcnq5
chr1	22283966	22284368	-331436	NM_001310477	intron	Kcnq5
chr1	22367295	22368015	-414924	NM_001310477	intron	Kcnq5
chr1	22473211	22474391	338762	NM_001012625	intron	Rims1
chr1	22514479	22515040	297803	NM_001012625	intron	Rims1
chr1	22516180	22516505	296220	NM_001012625	intron	Rims1
chr1	22526015	22526923	286094	NM_001012625	intron	Rims1
chr1	22539790	22540659	272338	NM_001012625	intron	Rims1
chr1	22544916	22545159	267525	NM_001012625	intron	Rims1
chr1	23262641	23263003	-16286	NR_029533	Intergenic	Mir30a
chr1	23263142	23264250	-15412	NR_029533	Intergenic	Mir30a
chr1	23389558	23389930	270	NM_001081079	exon	Ogfrl1
chr1	23610928	23611188	-157707	NM_172124	Intergenic	B3gat2
chr1	23611467	23611936	-157063	NM_172124	Intergenic	B3gat2
chr1	23769341	23770004	908	NM_172124	exon	B3gat2
chr1	23910154	23910480	6258	NR_110972	intron	Smap1
chr1	23941836	23942209	-12803	NM_028534	Intergenic	Smap1
chr1	23975201	23975585	37086	NM_026503	Intergenic	Sdhaf4
chr1	23977865	23978271	34411	NM_026503	Intergenic	Sdhaf4
chr1	24012228	24012507	111	NM_026503	intron	Sdhaf4
chr1	24017840	24018113	-5498	NM_026503	3'UTR	Sdhaf4
chr1	24170975	24171238	-13342	NM_007740	Intergenic	Col9a1
chr1	24684210	24684855	-850	NM_026719	promoter-TSS	Lmbrd1
chr1	24685227	24685529	-5	NM_026719	promoter-TSS	Lmbrd1
chr1	24826970	24827221	141339	NM_001310483	Intergenic	Lmbrd1
chr1	25069554	25070139	264952	NM_001204913	Intergenic	Gm20172
chr1	25235163	25235988	99223	NM_001204913	intron	Gm20172
chr1	25238647	25239188	95881	NM_001204913	intron	Gm20172
chr1	25285306	25285714	49289	NM_001204913	intron	Gm20172
chr1	25299346	25299863	35194	NM_001204913	intron	Gm20172
chr1	25367027	25367272	-32351	NM_001204913	intron	Gm20172
chr1	25519567	25519812	-184891	NM_001204913	intron	Gm20172
chr1	25887495	25887812	-1102	NM_175642	Intergenic	Adgrb3
chr1	25944678	25945297	-58436	NM_175642	Intergenic	Adgrb3
chr1	26286574	26287092	-400281	NM_175642	Intergenic	Adgrb3
chr1	26396710	26397843	347028	NM_001033764	Intergenic	4931408C20Rik
chr1	26584541	26585115	159477	NM_001033764	Intergenic	4931408C20Rik
chr1	28870742	28871028	-33788	NM_001013750	Intergenic	Gm597
chr1	30034975	30035925	557117	NR_105760	Intergenic	Mir6342
chr1	30605440	30606125	314318	NM_001081080	Intergenic	Phf3
chr1	30861643	30862507	58026	NM_001081080	exon	Phf3
chr1	30904354	30905356	15246	NM_001081080	intron	Phf3
chr1	30924413	30924946	-4579	NM_001081080	Intergenic	Phf3
chr1	30930304	30931320	-10711	NM_001081080	Intergenic	Phf3
chr1	30931503	30931849	-11575	NM_001081080	Intergenic	Phf3
chr1	30994245	30994619	12123	NR_002688	Intergenic	Gm13363
chr1	31003579	31003824	2853	NR_002688	intron	Gm13363
chr1	31005869	31007147	47	NR_002688	promoter-TSS	Gm13363
chr1	31160265	31160557	-72869	NM_153601	Intergenic	Lgsn
chr1	31213044	31213343	-20086	NM_153601	intron	Lgsn
chr1	31290350	31290959	10971	NM_029062	Intergenic	Pih1d3
chr1	31392190	31392435	70621	NR_015347	Intergenic	Gm4850
chr1	31735302	31735921	413920	NR_015347	Intergenic	Gm4850
chr1	33328329	33328874	398037	NM_008922	Intergenic	Prim2
chr1	33561151	33561636	165245	NM_008922	intron	Prim2
chr1	33612432	33613131	113857	NM_008922	intron	Prim2
chr1	33693183	33693927	33084	NM_008922	intron	Prim2
chr1	33699367	33699617	27147	NM_008922	intron	Prim2
chr1	33726193	33727228	42	NR_033199	promoter-TSS	1700001G17Rik
chr1	33771411	33772150	-4960	NM_008999	Intergenic	Rab23
chr1	33776497	33776888	-48	NM_008999	promoter-TSS	Rab23
chr1	33799758	33800196	14618	NM_145392	TTS	Bag2
chr1	33812575	33813095	1760	NM_145392	intron	Bag2
chr1	33814188	33814846	78	NM_145392	promoter-TSS	Bag2
chr1	33870635	33871619	313	NM_133817	intron	Zfp451
chr1	33917730	33918206	-22209	NM_001161816	intron	Gm15455
chr1	33960384	33960766	3891	NM_177235	intron	Bend6
chr1	33962945	33963432	1277	NM_177235	intron	Bend6
chr1	33963809	33965313	51	NM_001310484	promoter-TSS	Bend6
chr1	33965972	33966217	1025	NM_001276764	intron	Dst
chr1	33983687	33984071	18809	NM_001276764	intron	Dst
chr1	34001675	34002895	37215	NM_001276764	intron	Dst
chr1	34003062	34003818	38370	NM_001276764	intron	Dst
chr1	34020054	34020740	-48273	NM_133833	intron	Dst
chr1	34021220	34021885	-47117	NM_133833	intron	Dst
chr1	34026077	34026330	-42466	NM_133833	intron	Dst
chr1	34031332	34031858	-37075	NM_133833	intron	Dst
chr1	34034264	34034504	-34286	NM_133833	intron	Dst
chr1	34062136	34062666	-6269	NM_133833	intron	Dst
chr1	34063110	34064491	-4869	NM_133833	intron	Dst
chr1	34067919	34068858	-281	NM_133833	promoter-TSS	Dst
chr1	34076965	34077853	8739	NM_134448	intron	Dst
chr1	34093566	34093995	25111	NM_134448	intron	Dst
chr1	34094163	34094490	25657	NM_134448	intron	Dst
chr1	34095585	34096224	27235	NM_134448	intron	Dst
chr1	34097895	34098514	29535	NM_134448	intron	Dst
chr1	34102322	34103056	34019	NM_134448	intron	Dst
chr1	34108025	34108393	39539	NM_134448	intron	Dst
chr1	34109353	34109620	40817	NM_134448	intron	Dst
chr1	34112907	34113904	44736	NM_134448	intron	Dst
chr1	34114840	34115475	46488	NM_134448	intron	Dst
chr1	34115994	34116557	47606	NM_134448	intron	Dst
chr1	34117189	34117818	48834	NM_134448	intron	Dst
chr1	34125472	34125728	-48604	NR_105861	intron	Mir6896
chr1	34127118	34127505	-46892	NR_105861	intron	Mir6896
chr1	34130195	34132153	-43030	NR_105861	intron	Mir6896
chr1	34132944	34133247	-41108	NR_105861	intron	Mir6896
chr1	34133664	34134612	-40066	NR_105861	intron	Mir6896
chr1	34153677	34154715	-20008	NR_105861	intron	Mir6896
chr1	34159421	34161247	-13870	NR_105861	intron	Mir6896
chr1	34163516	34164586	-10153	NR_105861	intron	Mir6896
chr1	34165527	34166215	-8333	NR_105861	intron	Mir6896
chr1	34166477	34166785	-7573	NR_105861	intron	Mir6896
chr1	34167387	34168316	-6352	NR_105861	intron	Mir6896
chr1	34169634	34170009	-4382	NR_105861	intron	Mir6896
chr1	34171276	34171540	-2796	NR_105861	intron	Mir6896
chr1	34173266	34173520	-811	NR_105861	promoter-TSS	Mir6896
chr1	34177885	34178248	3863	NR_105861	intron	Mir6896
chr1	34184857	34185152	10801	NR_105861	intron	Mir6896
chr1	34190679	34191392	16832	NR_105861	intron	Mir6896
chr1	34196107	34198022	-20110	NM_010081	intron	Dst
chr1	34200181	34200821	-16674	NM_010081	intron	Dst
chr1	34203726	34204023	-13300	NM_010081	intron	Dst
chr1	34212802	34213067	-4240	NM_010081	intron	Dst
chr1	34214162	34214545	-2821	NM_010081	intron	Dst
chr1	34226231	34226478	9180	NM_010081	intron	Dst
chr1	34231962	34232209	14911	NM_010081	intron	Dst
chr1	34233811	34234774	17118	NM_010081	intron	Dst
chr1	34235018	34235533	18101	NM_010081	exon	Dst
chr1	34248865	34249381	31948	NM_010081	exon	Dst
chr1	34275357	34275622	58315	NM_010081	intron	Dst
chr1	34293169	34293585	76202	NM_010081	intron	Dst
chr1	34302778	34303148	85788	NM_010081	intron	Dst
chr1	34309720	34310006	92688	NM_010081	intron	Dst
chr1	34345718	34346160	128764	NM_010081	intron	Dst
chr1	34458811	34459615	30831	NR_039562	Intergenic	Mir5103
chr1	34461992	34462266	27915	NR_039562	Intergenic	Mir5103
chr1	34489426	34490398	132	NR_039562	TTS	Mir5103
chr1	34490831	34491135	-939	NR_039562	promoter-TSS	Mir5103
chr1	34491589	34492069	-1785	NR_039562	Intergenic	Mir5103
chr1	34495974	34496993	33	NM_027159	promoter-TSS	Ccdc115
chr1	34525054	34525675	8774	NM_011206	intron	Ptpn18
chr1	34526646	34526898	10181	NM_011206	intron	Ptpn18
chr1	34593185	34594467	1333	NM_007685	intron	Cfc1
chr1	34603872	34604406	11646	NM_007685	Intergenic	Cfc1
chr1	34604817	34605133	12482	NM_007685	Intergenic	Cfc1
chr1	34626565	34626936	-8963	NM_009356	Intergenic	Prss40
chr1	34636260	34636598	-109	NM_213727	promoter-TSS	Amer3
chr1	34757152	34757717	-64380	NR_033627	Intergenic	AA619741
chr1	34806186	34806866	-52041	NM_183019	Intergenic	Arhgef4
chr1	34858036	34859450	176	NM_183019	5'UTR	Arhgef4
chr1	34862956	34863213	4518	NM_183019	intron	Arhgef4
chr1	34894849	34895327	4807	NM_001160235	intron	Fam168b
chr1	34897151	34897470	2584	NM_001160235	intron	Fam168b
chr1	34898839	34900548	201	NM_001160235	5'UTR	Fam168b
chr1	34906608	34907233	117	NM_145516	intron	Plekhb2
chr1	34909880	34910306	3289	NM_145516	intron	Plekhb2
chr1	34916567	34917565	10262	NM_145516	intron	Plekhb2
chr1	34921262	34921911	14783	NM_145516	intron	Plekhb2
chr1	34933991	34934313	27348	NM_145516	3'UTR	Plekhb2
chr1	34940468	34941090	33975	NM_145516	Intergenic	Plekhb2
chr1	35289263	35290125	382890	NM_145516	Intergenic	Plekhb2
chr1	35415928	35416249	509285	NM_145516	Intergenic	Plekhb2
chr1	35491763	35492020	585088	NM_145516	Intergenic	Plekhb2
chr1	35492617	35493114	586062	NM_145516	Intergenic	Plekhb2
chr1	35499908	35500235	593268	NM_145516	Intergenic	Plekhb2
chr1	35509236	35509723	602676	NM_145516	Intergenic	Plekhb2
chr1	35738842	35739105	-386271	NM_015818	Intergenic	Hs6st1
chr1	35754439	35755173	-370439	NM_015818	Intergenic	Hs6st1
chr1	35806762	35807746	-317991	NM_015818	Intergenic	Hs6st1
chr1	35820428	35820700	-304681	NM_015818	Intergenic	Hs6st1
chr1	35868133	35868667	-256845	NM_015818	Intergenic	Hs6st1
chr1	35879179	35880043	-245634	NM_015818	Intergenic	Hs6st1
chr1	35881139	35881521	-243915	NM_015818	Intergenic	Hs6st1
chr1	35896207	35896712	-228785	NM_015818	Intergenic	Hs6st1
chr1	35898422	35898938	-226565	NM_015818	Intergenic	Hs6st1
chr1	35903164	35903844	-221741	NM_015818	Intergenic	Hs6st1
chr1	35907413	35908221	-217428	NM_015818	Intergenic	Hs6st1
chr1	35912856	35913745	-211944	NM_015818	Intergenic	Hs6st1
chr1	35938430	35938882	-186589	NM_015818	Intergenic	Hs6st1
chr1	35962146	35963101	-162621	NM_015818	Intergenic	Hs6st1
chr1	35983706	35983955	-141414	NM_015818	Intergenic	Hs6st1
chr1	35987761	35988307	-137211	NM_015818	Intergenic	Hs6st1
chr1	35996770	35997027	-128346	NM_015818	Intergenic	Hs6st1
chr1	35998263	35998788	-126719	NM_015818	Intergenic	Hs6st1
chr1	36000454	36002455	-123790	NM_015818	Intergenic	Hs6st1
chr1	36008503	36008961	-116513	NM_015818	Intergenic	Hs6st1
chr1	36035211	36036074	-89602	NM_015818	Intergenic	Hs6st1
chr1	36067731	36068112	-57323	NM_015818	Intergenic	Hs6st1
chr1	36070173	36071595	-54361	NM_015818	Intergenic	Hs6st1
chr1	36073842	36074424	-51112	NM_015818	Intergenic	Hs6st1
chr1	36087337	36087702	-37725	NM_015818	Intergenic	Hs6st1
chr1	36111239	36112233	-13509	NM_015818	Intergenic	Hs6st1
chr1	36115879	36116330	-9140	NM_015818	Intergenic	Hs6st1
chr1	36116521	36118948	-7510	NM_015818	Intergenic	Hs6st1
chr1	36119097	36119466	-5963	NM_015818	Intergenic	Hs6st1
chr1	36119609	36120541	-5170	NM_015818	Intergenic	Hs6st1
chr1	36121467	36122533	-3245	NM_015818	Intergenic	Hs6st1
chr1	36124027	36124326	-1068	NM_015818	Intergenic	Hs6st1
chr1	36124579	36126727	408	NM_015818	exon	Hs6st1
chr1	36127409	36127775	2347	NM_015818	intron	Hs6st1
chr1	36131119	36131543	6086	NM_015818	intron	Hs6st1
chr1	36133804	36134485	8900	NM_015818	intron	Hs6st1
chr1	36145113	36147185	20904	NM_015818	intron	Hs6st1
chr1	36163328	36163573	37707	NR_105862	TTS	Mir6897
chr1	36178344	36178651	22660	NR_105862	Intergenic	Mir6897
chr1	36214841	36215684	-14105	NR_105862	intron	Mir6897
chr1	36296213	36297916	4082	NM_198899	intron	Uggt1
chr1	36298893	36299265	2068	NM_198899	intron	Uggt1
chr1	36300561	36301374	179	NM_198899	exon	Uggt1
chr1	36303427	36303818	-2476	NM_198899	Intergenic	Uggt1
chr1	36308250	36308971	-7464	NM_198899	Intergenic	Uggt1
chr1	36309132	36309372	-8105	NM_198899	Intergenic	Uggt1
chr1	36355023	36355486	-9323	NM_001290727	Intergenic	Arid5a
chr1	36364427	36365090	181	NM_001172205	intron	Arid5a
chr1	36372010	36373295	8075	NM_001172205	intron	Arid5a
chr1	36380950	36381368	16581	NM_001172205	TTS	Arid5a
chr1	36424560	36425956	768	NM_172652	intron	Kansl3
chr1	36474372	36474908	27476	NM_001310517	exon	Lman2l
chr1	36501760	36502114	179	NM_001310517	exon	Lman2l
chr1	36528018	36528928	31	NM_033570	promoter-TSS	Cnnm4
chr1	36568344	36569083	-7	NM_001039551	promoter-TSS	Cnnm3
chr1	36569320	36569621	750	NM_053186	exon	Cnnm3
chr1	36575711	36575956	7113	NM_053186	exon	Cnnm3
chr1	36585223	36585532	7206	NM_153502	TTS	Ankrd23
chr1	36603743	36604288	81	NM_001310533	promoter-TSS	Ankrd39
chr1	36612482	36612785	1768	NM_001304330	intron	Sema4c
chr1	36613140	36613538	1063	NM_001304330	intron	Sema4c
chr1	36613654	36614628	261	NM_001304330	intron	Sema4c
chr1	36614805	36615410	118	NM_001126047	promoter-TSS	Sema4c
chr1	36624803	36625313	-9832	NM_001126047	intron	Sema4c
chr1	36630336	36630798	-15341	NM_001126047	intron	Sema4c
chr1	36634168	36634408	15889	NM_027957	intron	Fam178b
chr1	36636854	36637968	12766	NM_027957	intron	Fam178b
chr1	36640360	36640630	9682	NM_027957	intron	Fam178b
chr1	36665234	36665656	-15268	NM_027957	intron	Fam178b
chr1	36670291	36671086	-20512	NM_027957	intron	Fam178b
chr1	36687102	36687883	-37316	NM_027957	intron	Fam178b
chr1	36689629	36690121	-39698	NM_027957	intron	Fam178b
chr1	36747977	36748943	128	NM_009942	exon	Cox5b
chr1	36764524	36765305	1855	NM_146107	intron	Actr1b
chr1	36766107	36766878	277	NM_146107	intron	Actr1b
chr1	36815971	36816281	-2517	NM_009539	Intergenic	Zap70
chr1	36824254	36824627	662	NM_001289765	intron	Zap70
chr1	36826721	36827203	3183	NM_001289765	intron	Zap70
chr1	36841499	36842137	5989	NM_001289612	Intergenic	Zap70
chr1	36842333	36842673	6674	NM_001289612	Intergenic	Zap70
chr1	36860867	36861874	25542	NM_001289612	exon	Zap70
chr1	36871053	36871432	35414	NM_001289612	intron	Zap70
chr1	36887828	36888824	52497	NM_001289612	intron	Zap70
chr1	36901973	36902292	66304	NM_001289612	intron	Zap70
chr1	36911149	36911447	75469	NM_001289612	intron	Zap70
chr1	36912437	36912704	76742	NM_001289612	intron	Zap70
chr1	36913870	36914292	78252	NM_001289612	intron	Zap70
chr1	36940765	36941332	55323	NM_018872	intron	Tmem131
chr1	36955633	36956054	40528	NM_018872	intron	Tmem131
chr1	36960648	36960951	35572	NM_018872	intron	Tmem131
chr1	36996395	36997358	-505	NM_018872	promoter-TSS	Tmem131
chr1	37000277	37001394	-4464	NM_018872	Intergenic	Tmem131
chr1	37018928	37020506	-23345	NM_018872	Intergenic	Tmem131
chr1	37033983	37034228	-37734	NM_018872	Intergenic	Tmem131
chr1	37039328	37039729	-43157	NM_018872	Intergenic	Tmem131
chr1	37040680	37041734	-44835	NM_018872	Intergenic	Tmem131
chr1	37041918	37045872	-47523	NM_018872	Intergenic	Tmem131
chr1	37105841	37106474	-109786	NM_018872	Intergenic	Tmem131
chr1	37117240	37117572	-121034	NM_018872	Intergenic	Tmem131
chr1	37142038	37142397	-132905	NM_001282010	Intergenic	Cnga3
chr1	37186788	37187356	-88051	NM_001282010	Intergenic	Cnga3
chr1	37356459	37356931	12	NM_001290797	promoter-TSS	Inpp4a
chr1	37381208	37381963	24903	NM_001290797	intron	Inpp4a
chr1	37456077	37456504	30229	NM_001290799	intron	Inpp4a
chr1	37458741	37459016	28069	NM_198006	intron	Coa5
chr1	37486312	37487264	160	NM_198006	promoter-TSS	Coa5
chr1	37567104	37567578	-21891	NR_024017	intron	4930594C11Rik
chr1	37597402	37598329	-5	NM_173870	promoter-TSS	Mgat4a
chr1	37599924	37600324	-2263	NM_173870	Intergenic	Mgat4a
chr1	37673256	37673655	-75595	NM_173870	intron	Mgat4a
chr1	37673794	37674034	-76053	NM_173870	intron	Mgat4a
chr1	37681022	37681518	-83409	NM_173870	exon	Mgat4a
chr1	37698328	37698616	78184	NM_028096	intron	2010300C02Rik
chr1	37700798	37701369	75572	NM_028096	intron	2010300C02Rik
chr1	37727930	37728821	48280	NM_028096	intron	2010300C02Rik
chr1	37731703	37732661	44474	NM_028096	intron	2010300C02Rik
chr1	37751312	37751612	25194	NM_028096	intron	2010300C02Rik
chr1	37908781	37909040	3307	NR_110976	intron	Tsga10
chr1	37921309	37922471	37	NM_207228	promoter-TSS	Tsga10
chr1	37929069	37929365	166	NM_001037918	intron	Lipt1
chr1	37946790	37947421	150	NM_026913	promoter-TSS	Mitd1
chr1	37985164	37985562	-12025	NM_001033427	Intergenic	Lyg2
chr1	38054891	38055293	237	NM_198303	5'UTR	Eif5b
chr1	38068888	38069184	14181	NM_198303	intron	Eif5b
chr1	38115228	38115862	60690	NM_198303	intron	Eif5b
chr1	38130793	38131308	55456	NM_019570	intron	Rev1
chr1	38185801	38187113	50	NM_019570	promoter-TSS	Rev1
chr1	38255122	38256016	-69062	NM_019570	intron	Rev1
chr1	38257126	38257609	-70861	NM_019570	intron	Rev1
chr1	38312723	38312997	-126353	NM_019570	intron	Rev1
chr1	38348417	38348773	-162088	NM_019570	intron	Rev1
chr1	38441082	38441616	242740	NM_001290814	intron	Aff3
chr1	38448969	38449309	234950	NM_001290814	intron	Aff3
chr1	38451272	38451987	232459	NM_001290814	intron	Aff3
chr1	38532628	38533043	151253	NM_001290814	intron	Aff3
chr1	38563200	38563954	120512	NM_001290814	intron	Aff3
chr1	38678733	38679099	5173	NM_001290814	intron	Aff3
chr1	38683814	38684472	-54	NM_001290814	promoter-TSS	Aff3
chr1	38826948	38827439	50866	NM_001029878	Intergenic	Lonrf2
chr1	38853709	38854008	24201	NM_001029878	3'UTR	Lonrf2
chr1	38880416	38881495	-2896	NM_001029878	Intergenic	Lonrf2
chr1	38892857	38893479	-15108	NM_001029878	Intergenic	Lonrf2
chr1	38926249	38926658	28551	NM_145142	intron	Chst10
chr1	38930738	38931321	23975	NM_145142	intron	Chst10
chr1	38954507	38955214	144	NM_145142	5'UTR	Chst10
chr1	38960880	38961368	-6119	NM_145142	Intergenic	Chst10
chr1	39026377	39026643	-18149	NM_026850	Intergenic	Pdcl3
chr1	39043978	39044647	-346	NM_026850	promoter-TSS	Pdcl3
chr1	39062462	39063068	18106	NM_026850	Intergenic	Pdcl3
chr1	39126690	39127416	82394	NM_026850	Intergenic	Pdcl3
chr1	39179267	39180487	63960	NR_105767	Intergenic	Mir6349
chr1	39249055	39249341	-1919	NM_008719	Intergenic	Npas2
chr1	39250957	39251197	-40	NM_008719	promoter-TSS	Npas2
chr1	39292226	39292616	41304	NM_008719	intron	Npas2
chr1	39294121	39294997	43442	NM_008719	intron	Npas2
chr1	39348813	39349241	-75669	NM_053257	intron	Rpl31
chr1	39392591	39393057	-31872	NM_053257	intron	Rpl31
chr1	39405817	39406792	-18391	NM_053257	intron	Rpl31
chr1	39419150	39419632	-5305	NM_053257	3'UTR	Rpl31
chr1	39424756	39425946	655	NM_001252218	intron	Rpl31
chr1	39474580	39475008	50098	NM_001252218	intron	Rpl31
chr1	39486818	39487434	48466	NM_018775	intron	Tbc1d8
chr1	39500658	39500903	34811	NM_018775	intron	Tbc1d8
chr1	39513092	39513738	22177	NM_018775	intron	Tbc1d8
chr1	39522676	39523645	12431	NM_018775	intron	Tbc1d8
chr1	39534762	39535902	260	NM_018775	exon	Tbc1d8
chr1	39536578	39536841	-1118	NM_018775	Intergenic	Tbc1d8
chr1	39584005	39585844	-7722	NM_028043	Intergenic	Cnot11
chr1	39592307	39593328	171	NM_028043	exon	Cnot11
chr1	39594530	39594775	2006	NM_028043	intron	Cnot11
chr1	39633518	39634760	53	NM_001033135	promoter-TSS	Rnf149
chr1	39665271	39665689	-31288	NM_001033135	Intergenic	Rnf149
chr1	39669878	39670296	-35895	NM_001033135	Intergenic	Rnf149
chr1	39671124	39672214	36358	NM_170597	Intergenic	Creg2
chr1	39678795	39679660	28799	NM_170597	3'UTR	Creg2
chr1	39706709	39707569	888	NM_170597	intron	Creg2
chr1	39707701	39708102	125	NM_170597	5'UTR	Creg2
chr1	39713386	39714176	-5754	NM_170597	Intergenic	Creg2
chr1	39720359	39720604	-12455	NM_170597	Intergenic	Creg2
chr1	39720858	39721537	-13171	NM_170597	TTS	Creg2
chr1	39722501	39722832	-14640	NM_170597	intron	Creg2
chr1	39735670	39736159	-27888	NM_170597	intron	Creg2
chr1	39756916	39758607	20072	NM_001145660	intron	Rfx8
chr1	39759273	39759849	18273	NM_001145660	intron	Rfx8
chr1	39775320	39775876	2236	NM_001145660	intron	Rfx8
chr1	39777827	39778522	-341	NM_001145660	promoter-TSS	Rfx8
chr1	39787284	39787579	-9598	NM_001145660	Intergenic	Rfx8
chr1	39792299	39792546	-14589	NM_001145660	Intergenic	Rfx8
chr1	39793125	39793365	-15411	NM_001145660	Intergenic	Rfx8
chr1	39795649	39796005	-17993	NM_001145660	Intergenic	Rfx8
chr1	39803523	39803795	-25825	NM_001145660	Intergenic	Rfx8
chr1	39806491	39806861	-28842	NM_001145660	Intergenic	Rfx8
chr1	39818863	39819327	-41261	NM_001145660	Intergenic	Rfx8
chr1	39916122	39916548	-12160	NR_040465	Intergenic	1700066B17Rik
chr1	39924876	39925179	-20853	NR_040465	Intergenic	1700066B17Rik
chr1	39941708	39942044	-15882	NM_001252202	Intergenic	Map4k4
chr1	39952517	39952762	-5118	NM_001252202	Intergenic	Map4k4
chr1	39957043	39958576	52	NM_008696	promoter-TSS	Map4k4
chr1	39959056	39960396	1968	NM_008696	intron	Map4k4
chr1	39975487	39975829	17900	NM_008696	intron	Map4k4
chr1	39979686	39981192	22681	NM_008696	intron	Map4k4
chr1	39993205	39993674	35682	NM_008696	intron	Map4k4
chr1	40001609	40002294	44194	NM_008696	intron	Map4k4
chr1	40006645	40007344	49237	NM_008696	intron	Map4k4
chr1	40013422	40013667	55787	NM_008696	intron	Map4k4
chr1	40020356	40021057	62949	NM_008696	intron	Map4k4
chr1	40059190	40059577	-82229	NM_010555	intron	Il1r2
chr1	40108990	40109326	-32455	NM_010555	Intergenic	Il1r2
chr1	40129129	40129452	-12322	NM_010555	Intergenic	Il1r2
chr1	40142596	40142844	-24	NR_037980	promoter-TSS	Gm16894
chr1	40293058	40293443	11326	NM_008362	intron	Il1r1
chr1	40323189	40323886	107	NM_001123382	5'UTR	Il1r1
chr1	40361041	40361605	-20149	NM_133193	intron	Il1rl2
chr1	40414648	40415456	33580	NM_133193	intron	Il1rl2
chr1	40417414	40417906	36188	NM_133193	intron	Il1rl2
chr1	40722180	40722425	-16254	NM_001033289	Intergenic	Slc9a2
chr1	40736891	40737366	-1428	NM_001033289	Intergenic	Slc9a2
chr1	40737853	40738104	-578	NM_001033289	promoter-TSS	Slc9a2
chr1	41025190	41025617	162958	NM_001081198	Intergenic	Tmem182
chr1	41188025	41188739	49715	NR_040475	Intergenic	4930448I06Rik
chr1	41196689	41197844	40830	NR_040475	Intergenic	4930448I06Rik
chr1	41400254	41400496	-162278	NR_040475	Intergenic	4930448I06Rik
chr1	41446934	41447679	-209210	NR_040475	Intergenic	4930448I06Rik
chr1	42115341	42115820	636089	NR_027826	Intergenic	Pantr1
chr1	42300258	42300551	451265	NR_027826	Intergenic	Pantr1
chr1	42325679	42325994	425833	NR_027826	Intergenic	Pantr1
chr1	42493547	42493805	257994	NR_027826	Intergenic	Pantr1
chr1	42635579	42635861	115950	NR_027826	Intergenic	Pantr1
chr1	42751734	42751995	-195	NR_027826	promoter-TSS	Pantr1
chr1	42752315	42752606	-791	NR_027826	promoter-TSS	Pantr1
chr1	42781811	42782123	-11668	NR_110495	Intergenic	Pantr2
chr1	42783222	42783667	-13146	NR_110495	Intergenic	Pantr2
chr1	42945166	42946709	37860	NM_023514	intron	Mrps9
chr1	42948194	42948852	40445	NM_023514	intron	Mrps9
chr1	42956268	42956541	48327	NM_023514	intron	Mrps9
chr1	42970495	42970735	-39102	NM_053107	Intergenic	Gpr45
chr1	43009681	43009951	99	NM_053107	promoter-TSS	Gpr45
chr1	43051109	43051354	41515	NM_053107	intron	Gpr45
chr1	43148909	43149169	6428	NM_001013025	intron	Tgfbrap1
chr1	43155256	43156050	98	NM_133818	promoter-TSS	AI597479
chr1	43196507	43196871	24117	NM_010212	intron	Fhl2
chr1	43220609	43221389	-193	NM_010212	promoter-TSS	Fhl2
chr1	43224867	43225245	-4250	NM_010212	intron	Fhl2
chr1	43228588	43228998	-7987	NM_010212	intron	Fhl2
chr1	43259082	43259573	-5722	NM_001289533	Intergenic	Fhl2
chr1	43453282	43453721	-49094	NM_010879	Intergenic	Nck2
chr1	43488786	43489124	-13641	NM_010879	Intergenic	Nck2
chr1	43502056	43504137	501	NM_010879	intron	Nck2
chr1	43540675	43541580	38532	NM_010879	intron	Nck2
chr1	43568438	43568683	65965	NM_010879	intron	Nck2
chr1	43627856	43628306	125485	NM_010879	TTS	Nck2
chr1	43841918	43842520	42334	NM_026430	intron	Uxs1
chr1	43877362	43878003	6870	NM_026430	intron	Uxs1
chr1	43884216	43885128	-119	NM_026430	promoter-TSS	Uxs1
chr1	43956053	43956550	-34537	NM_001310540	Intergenic	Tpp2
chr1	43971057	43971310	-19655	NM_001310540	Intergenic	Tpp2
chr1	43990361	43991104	-106	NM_001310540	promoter-TSS	Tpp2
chr1	43994201	43994441	3482	NM_009418	intron	Tpp2
chr1	44159260	44159622	-208	NM_029368	promoter-TSS	Tex30
chr1	44175256	44175826	77	NM_023645	promoter-TSS	Kdelc1
chr1	44175927	44177430	-134	NM_144558	promoter-TSS	Bivm
chr1	44204576	44204838	118	NM_011729	5'UTR	Ercc5
chr1	44388674	44389025	-113074	NM_207281	Intergenic	Mettl21e
chr1	44608201	44608627	-102	NM_028450	promoter-TSS	Gulp1
chr1	44609696	44610169	1417	NM_028450	intron	Gulp1
chr1	44625115	44625511	16797	NM_028450	intron	Gulp1
chr1	44670135	44670809	61956	NM_028450	intron	Gulp1
chr1	44860438	44860840	-58845	NR_040602	Intergenic	4930521E06Rik
chr1	44946660	44946962	-145017	NR_040602	Intergenic	4930521E06Rik
chr1	45414617	45415426	46639	NM_009930	Intergenic	Col3a1
chr1	45416459	45416976	48335	NM_009930	Intergenic	Col3a1
chr1	45464504	45464928	95411	NM_007737	intron	Col5a2
chr1	45559107	45559464	841	NM_007737	intron	Col5a2
chr1	45559668	45559913	336	NM_007737	5'UTR	Col5a2
chr1	45851691	45852657	-172	NM_028599	promoter-TSS	Wdr75
chr1	45875352	45875791	23226	NM_028599	intron	Wdr75
chr1	45982478	45983146	-373	NM_016917	promoter-TSS	Slc40a1
chr1	46123564	46123938	168	NM_001160386	intron	Dnah7b
chr1	46399649	46400132	-82472	NM_001310335	intron	Dnah7c
chr1	46571336	46572008	89309	NM_001310335	intron	Dnah7c
chr1	46706520	46707067	203560	NM_172653	intron	Slc39a10
chr1	46707226	46707703	202889	NM_172653	intron	Slc39a10
chr1	46909570	46910436	351	NM_172653	intron	Slc39a10
chr1	46910778	46911111	-591	NM_172653	promoter-TSS	Slc39a10
chr1	46920276	46920699	-10134	NM_172653	Intergenic	Slc39a10
chr1	46951146	46951408	-40923	NM_172653	Intergenic	Slc39a10
chr1	46973146	46973405	-62922	NM_172653	Intergenic	Slc39a10
chr1	46978399	46978952	-68322	NM_172653	Intergenic	Slc39a10
chr1	47115286	47115593	-205086	NM_172653	Intergenic	Slc39a10
chr1	47133316	47133626	-223117	NM_172653	Intergenic	Slc39a10
chr1	47545351	47545746	-21580	NR_105768	Intergenic	Mir6350
chr1	47884074	47884426	-360281	NR_105768	Intergenic	Mir6350
chr1	47890945	47891518	-367263	NR_105768	Intergenic	Mir6350
chr1	49410253	49410510	-1573985	NM_019790	Intergenic	Tmeff2
chr1	49937731	49937971	-1046516	NM_019790	Intergenic	Tmeff2
chr1	49942172	49942570	-1041996	NM_019790	Intergenic	Tmeff2
chr1	49942850	49943090	-1041397	NM_019790	Intergenic	Tmeff2
chr1	50983856	50984410	-234	NM_019790	promoter-TSS	Tmeff2
chr1	51244151	51244573	-101608	NM_138741	TTS	Sdpr
chr1	51486577	51487092	48408	NM_028696	Intergenic	Nabp1
chr1	51534595	51535872	9	NM_028696	promoter-TSS	Nabp1
chr1	51536432	51536754	-1350	NM_001310549	Intergenic	Nabp1
chr1	51565248	51565663	-30213	NM_001310549	Intergenic	Nabp1
chr1	51565849	51566529	-30946	NM_001310549	Intergenic	Nabp1
chr1	51592805	51593605	-57962	NM_001310549	Intergenic	Nabp1
chr1	51681364	51682179	-146529	NM_001310549	Intergenic	Nabp1
chr1	51703785	51704164	-168732	NM_001310549	Intergenic	Nabp1
chr1	51803279	51803606	169379	NM_001290982	Intergenic	Myo1b
chr1	51803709	51804171	168882	NM_001290982	Intergenic	Myo1b
chr1	51804446	51804706	168246	NM_001290982	Intergenic	Myo1b
chr1	51815498	51815924	157111	NM_001290982	intron	Myo1b
chr1	51859552	51859792	113150	NM_001290982	intron	Myo1b
chr1	51860617	51860944	112041	NM_001290982	intron	Myo1b
chr1	51902053	51902612	70489	NM_001290982	intron	Myo1b
chr1	51908915	51909326	63701	NM_001290982	intron	Myo1b
chr1	51936153	51936688	36401	NM_001290982	intron	Myo1b
chr1	51948823	51949175	23823	NM_001290982	intron	Myo1b
chr1	51952987	51953428	19614	NM_001290982	intron	Myo1b
chr1	51963089	51964043	9256	NM_001290982	intron	Myo1b
chr1	51971783	51973090	385	NM_001290982	intron	Myo1b
chr1	51985303	51985677	-12668	NM_001161817	Intergenic	Myo1b
chr1	51988334	51988846	-15768	NM_001161817	Intergenic	Myo1b
chr1	52065225	52065553	305	NM_011487	5'UTR	Stat4
chr1	52065728	52066615	1088	NM_011487	intron	Stat4
chr1	52136812	52137200	-39276	NM_009283	intron	Stat1
chr1	52170459	52171029	-5538	NM_009283	Intergenic	Stat1
chr1	52175839	52176725	0	NM_009283	promoter-TSS	Stat1
chr1	52206779	52207142	30495	NM_001205313	intron	Stat1
chr1	52221248	52221517	44917	NM_001205313	3'UTR	Stat1
chr1	52289059	52290819	137	NM_001081081	5'UTR	Gls
chr1	52350336	52350647	-60416	NM_001113383	Intergenic	Gls
chr1	52383018	52383298	-93082	NM_001113383	Intergenic	Gls
chr1	52513407	52513801	43688	NM_008667	3'UTR	Nab1
chr1	52556812	52557331	220	NM_008667	5'UTR	Nab1
chr1	52581554	52581819	-24395	NM_008667	Intergenic	Nab1
chr1	52584136	52584763	-27158	NM_008667	Intergenic	Nab1
chr1	52687436	52688392	365	NM_001142647	intron	Nemp2
chr1	52713364	52713908	26087	NM_001142647	3'UTR	Nemp2
chr1	52783408	52783960	478	NM_178081	intron	Mfsd6
chr1	52791066	52791375	-7059	NM_133829	Intergenic	Mfsd6
chr1	52815076	52815359	-31056	NM_133829	Intergenic	Mfsd6
chr1	52874195	52874823	23	NM_008384	promoter-TSS	Inpp1
chr1	53008654	53011069	-178	NM_144953	promoter-TSS	1700019D03Rik
chr1	53011746	53012038	-2208	NM_144953	Intergenic	1700019D03Rik
chr1	53267039	53267441	-22779	NM_027070	intron	1700019A02Rik
chr1	53353644	53354302	34	NM_145517	promoter-TSS	Ormdl1
chr1	53370313	53370900	139	NR_104360	non-coding	Osgepl1
chr1	53409263	53409826	51	NM_001290984	promoter-TSS	Asnsd1
chr1	53442200	53442561	-32785	NM_133728	Intergenic	Asnsd1
chr1	53450825	53451324	-41479	NM_133728	Intergenic	Asnsd1
chr1	53637974	53638816	125233	NM_001252070	intron	Dnah7a
chr1	53688945	53689307	74502	NM_001252070	intron	Dnah7a
chr1	53689448	53689710	74049	NM_001252070	intron	Dnah7a
chr1	53692524	53692853	70939	NM_001252070	intron	Dnah7a
chr1	53763393	53763843	10	NM_001252070	promoter-TSS	Dnah7a
chr1	53772242	53772494	-8740	NM_001252070	Intergenic	Dnah7a
chr1	53802753	53803170	39097	NM_133810	Intergenic	Stk17b
chr1	53804496	53804840	37391	NM_133810	Intergenic	Stk17b
chr1	53805403	53805818	36448	NM_133810	Intergenic	Stk17b
chr1	53806547	53808329	34621	NM_133810	Intergenic	Stk17b
chr1	53841754	53842440	-38	NM_133810	promoter-TSS	Stk17b
chr1	53880547	53880952	-25518	NR_106149	intron	Mir7681
chr1	53924205	53924509	18089	NR_106149	intron	Mir7681
chr1	54243538	54243783	8217	NM_001001883	intron	Hecw2
chr1	54250994	54252151	305	NM_001001883	intron	Hecw2
chr1	54440993	54441550	54598	NM_001033194	Intergenic	Gtf3c3
chr1	54459437	54460004	36149	NM_001033194	intron	Gtf3c3
chr1	54495571	54496031	69	NM_001033194	promoter-TSS	Gtf3c3
chr1	54541256	54542337	-45927	NM_001033194	intron	Gtf3c3
chr1	54555648	54555924	58742	NM_001163314	intron	Pgap1
chr1	54612521	54612761	1887	NM_001163314	intron	Pgap1
chr1	54614343	54614976	-132	NM_001163314	promoter-TSS	Pgap1
chr1	54641728	54643057	-27865	NM_001163314	Intergenic	Pgap1
chr1	54733636	54734598	-119589	NM_001163314	intron	Pgap1
chr1	54844432	54844672	138679	NM_001081433	intron	Ankrd44
chr1	54982873	54983655	-33	NM_001081433	promoter-TSS	Ankrd44
chr1	55086007	55086340	-1852	NM_031179	Intergenic	Sf3b1
chr1	55087735	55088199	-3645	NM_031179	Intergenic	Sf3b1
chr1	55096874	55097165	-12594	NM_026424	Intergenic	Coq10b
chr1	55108967	55109459	-401	NM_026424	promoter-TSS	Coq10b
chr1	55109666	55110079	259	NM_001039710	intron	Coq10b
chr1	55132637	55133029	11943	NM_010477	Intergenic	Hspd1
chr1	55142360	55142676	2258	NM_010477	intron	Hspd1
chr1	55143822	55145752	-11	NM_010477	promoter-TSS	Hspd1
chr1	55150093	55150338	5224	NM_008303	Intergenic	Hspe1
chr1	55160122	55160367	15253	NM_008303	Intergenic	Hspe1
chr1	55165279	55166011	20653	NM_008303	Intergenic	Hspe1
chr1	55187621	55188959	201	NM_025283	intron	Mob4
chr1	55228714	55228970	40753	NM_025283	exon	Mob4
chr1	55243586	55244141	39762	NM_028713	intron	Rftn2
chr1	55248971	55249211	34535	NM_028713	intron	Rftn2
chr1	55251453	55252005	31897	NM_028713	intron	Rftn2
chr1	55253359	55253716	30088	NM_028713	intron	Rftn2
chr1	55255304	55256407	27770	NM_028713	intron	Rftn2
chr1	55262613	55262987	20826	NM_028713	intron	Rftn2
chr1	55267869	55268338	15522	NM_028713	exon	Rftn2
chr1	55269572	55269895	13892	NM_028713	intron	Rftn2
chr1	55270352	55270597	13151	NM_028713	intron	Rftn2
chr1	55291907	55292289	-1923	NM_175439	Intergenic	Mars2
chr1	55293886	55294240	42	NM_175439	promoter-TSS	Mars2
chr1	55320576	55320881	26708	NM_175439	Intergenic	Mars2
chr1	55335861	55336363	42091	NM_175439	Intergenic	Mars2
chr1	55408777	55409135	10595	NM_001113367	intron	Boll
chr1	55437086	55437407	-16934	NM_029267	Intergenic	Boll
chr1	55463388	55463697	753	NM_001114663	intron	Plcl1
chr1	55632776	55633030	170113	NM_001114663	intron	Plcl1
chr1	55723080	55723722	260611	NM_001114663	intron	Plcl1
chr1	55941372	55941750	-46524	NR_045837	Intergenic	9130227L01Rik
chr1	55957464	55957915	-30395	NR_045837	Intergenic	9130227L01Rik
chr1	56023007	56023485	35161	NR_045837	intron	9130227L01Rik
chr1	56681237	56681482	12935	NM_027661	Intergenic	Hsfy2
chr1	56725542	56726099	-31526	NM_027661	Intergenic	Hsfy2
chr1	56741026	56741853	-47145	NM_027661	Intergenic	Hsfy2
chr1	56780380	56780849	-86320	NM_027661	Intergenic	Hsfy2
chr1	56901112	56901791	126726	NM_139146	intron	Satb2
chr1	56995340	56996178	32419	NM_139146	intron	Satb2
chr1	57010169	57010840	17673	NM_139146	intron	Satb2
chr1	57012214	57012578	15782	NM_139146	intron	Satb2
chr1	57028710	57030459	1272	NR_024325	non-coding	9130024F11Rik
chr1	57386531	57386834	47705	NR_037999	Intergenic	4930558J18Rik
chr1	57388835	57389474	45233	NR_037999	Intergenic	4930558J18Rik
chr1	57390346	57391147	43641	NR_037999	Intergenic	4930558J18Rik
chr1	57400270	57400769	33868	NR_037999	Intergenic	4930558J18Rik
chr1	57425929	57426695	8076	NR_037999	intron	4930558J18Rik
chr1	57434456	57434882	205	NM_028546	promoter-TSS	1700066M21Rik
chr1	57463021	57463764	1	NM_001081181	promoter-TSS	Maip1
chr1	57495764	57496144	-32436	NM_001302963	Intergenic	Tyw5
chr1	57526884	57527908	-63878	NM_001302963	Intergenic	Tyw5
chr1	57533478	57534186	-70314	NM_001302963	Intergenic	Tyw5
chr1	57534709	57535040	-71357	NM_001302963	Intergenic	Tyw5
chr1	57566609	57567287	-103430	NM_001302963	Intergenic	Tyw5
chr1	57584244	57584648	-120928	NM_001302963	Intergenic	Tyw5
chr1	57621262	57621560	-157893	NM_001302963	Intergenic	Tyw5
chr1	57664977	57665697	-166368	NM_144882	Intergenic	Spats2l
chr1	57668801	57670629	-161990	NM_144882	Intergenic	Spats2l
chr1	57830731	57831266	-706	NM_144882	promoter-TSS	Spats2l
chr1	57831737	57832395	361	NM_144882	intron	Spats2l
chr1	57836416	57837042	5024	NM_144882	intron	Spats2l
chr1	58026469	58027206	90	NM_001159864	promoter-TSS	Kctd18
chr1	58045825	58046570	4014	NM_001177867	intron	Sgol2a
chr1	58046818	58047349	4900	NM_001177867	intron	Sgol2a
chr1	58051948	58052205	-741	NM_199007	promoter-TSS	Sgol2a
chr1	58052473	58053634	236	NM_199007	5'UTR	Sgol2a
chr1	58054961	58055375	2350	NM_199007	intron	Sgol2a
chr1	58056283	58056701	3674	NM_199007	intron	Sgol2a
chr1	58086430	58087771	288	NM_009676	intron	Aox1
chr1	58089513	58090470	3179	NM_009676	intron	Aox1
chr1	58245266	58245948	-21634	NM_023631	intron	Aox4
chr1	58332799	58333230	-2155	NM_001008419	Intergenic	Aox2
chr1	58346752	58347724	12068	NM_001008419	intron	Aox2
chr1	58353088	58353334	18041	NM_001008419	intron	Aox2
chr1	58360469	58360795	25462	NM_001008419	intron	Aox2
chr1	58401903	58402322	-47867	NM_025824	intron	Bzw1
chr1	58415702	58416136	-34061	NM_025824	exon	Bzw1
chr1	58423460	58425159	-25670	NM_025824	intron	Bzw1
chr1	58426526	58426975	-23229	NM_025824	intron	Bzw1
chr1	58449154	58450795	-5	NM_025824	promoter-TSS	Bzw1
chr1	58457393	58457811	7622	NM_025824	exon	Bzw1
chr1	58479746	58480012	1053	NR_027853	intron	Clk1
chr1	58480229	58480878	378	NR_027853	intron	Clk1
chr1	58481003	58481917	-528	NR_027854	promoter-TSS	Clk1
chr1	58501733	58502863	32	NM_027374	promoter-TSS	Ppil3
chr1	58561354	58561978	287	NM_001271526	5'UTR	Orc2
chr1	58642641	58643731	-9	NM_172513	promoter-TSS	Fam126b
chr1	58746219	58746758	6344	NM_175370	intron	Als2cr12
chr1	58746914	58747219	5766	NM_175370	intron	Als2cr12
chr1	58780361	58781238	-6596	NM_001293805	intron	Cflar
chr1	58817518	58817763	30245	NM_001293805	Intergenic	Cflar
chr1	58818331	58820124	31832	NM_001293805	Intergenic	Cflar
chr1	58825772	58826600	-26032	NM_009812	Intergenic	Casp8
chr1	59008103	59008699	21925	NM_172406	intron	Trak2
chr1	59014633	59015271	15374	NM_172406	intron	Trak2
chr1	59018110	59018609	11966	NM_172406	intron	Trak2
chr1	59029966	59030846	-9	NM_172656	promoter-TSS	Stradb
chr1	59269786	59270080	24004	NM_001159948	intron	Als2
chr1	59277205	59277503	16583	NM_001159948	intron	Als2
chr1	59293733	59294499	-41	NM_146109	promoter-TSS	Als2
chr1	59294627	59294904	-691	NM_146109	promoter-TSS	Als2
chr1	59304607	59305092	-8901	NM_001033373	Intergenic	Cdk15
chr1	59313373	59314208	40	NM_001033373	promoter-TSS	Cdk15
chr1	59371904	59372158	58280	NM_001033373	intron	Cdk15
chr1	59373303	59373647	59724	NM_001033373	intron	Cdk15
chr1	59424778	59425288	111282	NM_001033373	Intergenic	Cdk15
chr1	59432801	59434715	-105233	NM_008057	Intergenic	Fzd7
chr1	59450982	59451227	-87886	NM_008057	Intergenic	Fzd7
chr1	59452907	59453152	-85961	NM_008057	Intergenic	Fzd7
chr1	59456525	59456768	-82344	NM_008057	Intergenic	Fzd7
chr1	59479504	59480772	-58853	NM_008057	Intergenic	Fzd7
chr1	59483633	59484154	-55097	NM_008057	Intergenic	Fzd7
chr1	59505300	59506092	-33295	NM_008057	Intergenic	Fzd7
chr1	59513619	59514061	-25151	NM_008057	Intergenic	Fzd7
chr1	59528901	59530395	-9343	NM_008057	Intergenic	Fzd7
chr1	59532408	59532684	-6445	NM_008057	Intergenic	Fzd7
chr1	59538342	59539694	27	NM_008057	promoter-TSS	Fzd7
chr1	59541809	59542201	3014	NM_008057	3'UTR	Fzd7
chr1	59543966	59545017	5501	NM_008057	TTS	Fzd7
chr1	59572818	59573564	83	NM_001013771	promoter-TSS	Gm973
chr1	59579162	59579620	6283	NM_001013771	intron	Gm973
chr1	59685836	59686444	41538	NM_009460	intron	Sumo1
chr1	59720295	59720800	7130	NM_009460	intron	Sumo1
chr1	59725307	59725593	2228	NM_009460	intron	Sumo1
chr1	59726720	59728001	317	NM_009460	intron	Sumo1
chr1	59741293	59741621	-393	NM_018868	promoter-TSS	Nop58
chr1	59741844	59742851	498	NM_018868	intron	Nop58
chr1	59754071	59755229	5848	NR_028554	intron	Snord70
chr1	59785087	59785902	23843	NR_028521	Intergenic	Snord11
chr1	59806752	59807244	-14125	NM_007561	Intergenic	Bmpr2
chr1	59819516	59820748	-991	NM_007561	promoter-TSS	Bmpr2
chr1	59821363	59821603	360	NM_007561	5'UTR	Bmpr2
chr1	59969450	59971025	388	NM_001037725	exon	Fam117b
chr1	59983036	59983417	13377	NM_001037725	intron	Fam117b
chr1	60099623	60099870	184	NM_027407	5'UTR	Ica1l
chr1	60133383	60134155	20982	NM_021312	TTS	Wdr12
chr1	60154202	60154542	379	NM_021312	promoter-TSS	Wdr12
chr1	60154995	60155580	56	NM_001199060	promoter-TSS	Wdr12
chr1	60194115	60194601	29431	NR_104344	intron	Carf
chr1	60237238	60238203	278	NM_173444	intron	Nbeal1
chr1	60399990	60400664	183	NM_001313721	intron	Cyp20a1
chr1	60465852	60467032	-21	NM_001198571	promoter-TSS	Abi2
chr1	60483309	60483812	17098	NM_001198570	intron	Abi2
chr1	60489291	60489808	23087	NM_001198570	intron	Abi2
chr1	60518452	60518956	52241	NM_001198570	intron	Abi2
chr1	60600647	60600969	22801	NM_001045513	intron	Raph1
chr1	60621967	60622267	1492	NM_001045513	intron	Raph1
chr1	60622691	60624114	206	NM_001045513	intron	Raph1
chr1	60653724	60654014	-30260	NM_001045513	Intergenic	Raph1
chr1	60835380	60836005	32461	NM_007642	Intergenic	Cd28
chr1	60875259	60875880	72338	NM_007642	Intergenic	Cd28
chr1	60893809	60894228	-71850	NM_009843	Intergenic	Ctla4
chr1	60895843	60896608	-69643	NM_009843	Intergenic	Ctla4
chr1	60907126	60911282	-56665	NM_009843	Intergenic	Ctla4
chr1	60913122	60913384	-52616	NM_009843	Intergenic	Ctla4
chr1	60917150	60917393	-48597	NM_009843	Intergenic	Ctla4
chr1	61152243	61152838	117783	NM_017480	Intergenic	Icos
chr1	61322666	61322917	-112484	NR_040483	Intergenic	9530026F06Rik
chr1	61474540	61474836	39412	NR_040483	Intergenic	9530026F06Rik
chr1	62227952	62228743	-521543	NM_001077406	intron	Nrp2
chr1	62371849	62372619	-377657	NM_001077406	intron	Nrp2
chr1	62439388	62439874	-310260	NM_001077406	intron	Nrp2
chr1	62444396	62445445	-304970	NM_001077406	intron	Nrp2
chr1	62545542	62545920	-204160	NM_001077406	intron	Nrp2
chr1	62610837	62611329	-138808	NM_001077406	intron	Nrp2
chr1	62634846	62635328	-114804	NM_001077406	intron	Nrp2
chr1	62694937	62695222	-54811	NM_001077406	Intergenic	Nrp2
chr1	62696857	62697499	-52713	NM_001077406	Intergenic	Nrp2
chr1	62711427	62712277	-38039	NM_001077406	Intergenic	Nrp2
chr1	62725076	62725674	-24516	NM_001077406	Intergenic	Nrp2
chr1	62747703	62748087	-1996	NM_001077406	Intergenic	Nrp2
chr1	62749738	62750218	87	NM_001077405	promoter-TSS	Nrp2
chr1	62752965	62753846	3515	NM_001077405	intron	Nrp2
chr1	62754951	62755372	5271	NM_001077405	intron	Nrp2
chr1	62763570	62764280	14034	NM_001077405	intron	Nrp2
chr1	62782885	62785112	34108	NM_001077405	intron	Nrp2
chr1	62788875	62789393	39243	NM_001077405	intron	Nrp2
chr1	62789700	62790225	40072	NM_001077405	intron	Nrp2
chr1	62799439	62800180	41496	NR_040601	intron	4930487H11Rik
chr1	62806597	62807138	34438	NR_040601	intron	4930487H11Rik
chr1	62813868	62814649	27047	NR_040601	intron	4930487H11Rik
chr1	62818993	62819338	22140	NR_040601	intron	4930487H11Rik
chr1	62823842	62824563	17103	NR_040601	intron	4930487H11Rik
chr1	62829811	62831035	10883	NR_040601	intron	4930487H11Rik
chr1	62840848	62841415	174	NR_040601	non-coding	4930487H11Rik
chr1	62868096	62868496	-26990	NR_040601	Intergenic	4930487H11Rik
chr1	62956493	62956769	-115325	NR_040601	Intergenic	4930487H11Rik
chr1	62957657	62958478	-116762	NR_040601	Intergenic	4930487H11Rik
chr1	62996775	62997412	-155788	NR_040601	Intergenic	4930487H11Rik
chr1	63032955	63033420	127653	NM_001081436	Intergenic	Ino80d
chr1	63037659	63038066	122978	NM_001081436	Intergenic	Ino80d
chr1	63113251	63113491	47470	NM_001081436	intron	Ino80d
chr1	63138329	63138784	22284	NM_001081436	intron	Ino80d
chr1	63156643	63157652	3693	NM_001081436	intron	Ino80d
chr1	63158766	63159051	1932	NM_001081436	intron	Ino80d
chr1	63160001	63160668	506	NM_001081436	promoter-TSS	Ino80d
chr1	63160982	63161422	-112	NR_045914	promoter-TSS	Ino80dos
chr1	63165026	63165448	3923	NR_045914	intron	Ino80dos
chr1	63184331	63185977	23840	NR_045914	intron	Ino80dos
chr1	63222523	63224041	114	NM_145518	promoter-TSS	Ndufs1
chr1	63246471	63247252	-70	NM_001285937	promoter-TSS	Zdbf2
chr1	63248196	63248646	1489	NM_001285936	intron	Zdbf2
chr1	63250633	63251394	4082	NM_001285936	intron	Zdbf2
chr1	63254229	63254603	6439	NM_146250	intron	Gpr1
chr1	63256604	63257241	3932	NM_146250	intron	Gpr1
chr1	63260634	63261162	-43	NM_146250	promoter-TSS	Gpr1
chr1	63284175	63284415	-23440	NM_146250	intron	Gpr1
chr1	63290264	63290812	-29305	NM_028673	intron	Zdbf2
chr1	63293656	63294477	-25776	NM_028673	intron	Zdbf2
chr1	63488432	63489475	-3511	NM_011780	Intergenic	Adam23
chr1	63492182	63493163	195	NM_001177600	5'UTR	NA
chr1	63713796	63714722	19242	NM_001081658	intron	Dytn
chr1	63776922	63777260	-108	NM_172422	promoter-TSS	Fastkd2
chr1	63967235	63967575	-43896	NR_027824	Intergenic	Gm13749
chr1	63967924	63968169	-43254	NR_027824	Intergenic	Gm13749
chr1	63991582	63991899	-19560	NR_027824	Intergenic	Gm13749
chr1	64055604	64056193	33176	NR_105864	Intergenic	Mir6899
chr1	64084900	64085162	4044	NR_105864	intron	Mir6899
chr1	64106912	64107231	-17997	NR_105864	intron	Mir6899
chr1	64126384	64126837	-37536	NR_105864	intron	Mir6899
chr1	64162394	64162634	5449	NM_033563	intron	Klf7
chr1	64167722	64168180	12	NM_033563	promoter-TSS	Klf7
chr1	64168436	64169296	-903	NM_033563	promoter-TSS	Klf7
chr1	64272540	64273416	-105015	NM_033563	Intergenic	Klf7
chr1	64324483	64324910	-156734	NM_033563	Intergenic	Klf7
chr1	64349800	64350190	-182032	NM_033563	Intergenic	Klf7
chr1	64352095	64352508	-184339	NM_033563	Intergenic	Klf7
chr1	64384926	64385446	-194192	NM_133828	Intergenic	Creb1
chr1	64462465	64463335	-116478	NM_133828	Intergenic	Creb1
chr1	64469946	64470240	-109285	NM_133828	Intergenic	Creb1
chr1	64532677	64533170	-46454	NM_133828	Intergenic	Creb1
chr1	64578312	64578828	-808	NM_133828	promoter-TSS	Creb1
chr1	64578997	64579275	-242	NM_133828	promoter-TSS	Creb1
chr1	64623201	64623562	40360	NM_025964	intron	Mettl21a
chr1	64624453	64624733	39149	NM_025964	intron	Mettl21a
chr1	64663609	64664456	-291	NM_025964	promoter-TSS	Mettl21a
chr1	64670129	64671023	-6834	NM_025964	Intergenic	Mettl21a
chr1	64736371	64737421	337	NR_038009	intron	2810408I11Rik
chr1	64737710	64738010	-59	NM_001097644	promoter-TSS	Ccnyl1
chr1	64741805	64742092	4030	NM_001097644	intron	Ccnyl1
chr1	64776763	64777193	7346	NM_001042659	TTS	Fzd5
chr1	64778385	64781693	4285	NM_001042659	3'UTR	Fzd5
chr1	64782418	64783666	1282	NM_001042659	exon	Fzd5
chr1	64783789	64785080	-111	NM_022721	promoter-TSS	Fzd5
chr1	64785226	64785647	-1113	NM_022721	Intergenic	Fzd5
chr1	64826052	64826873	-42139	NM_022721	Intergenic	Fzd5
chr1	64931291	64932135	71685	NM_001039493	intron	Plekhm3
chr1	64963151	64964133	39756	NM_001039493	intron	Plekhm3
chr1	65003010	65003563	111	NM_001039493	5'UTR	Plekhm3
chr1	65024834	65025109	-21574	NM_001039493	Intergenic	Plekhm3
chr1	65027883	65028360	-24724	NM_001039493	Intergenic	Plekhm3
chr1	65028567	65029297	-25534	NM_001039493	Intergenic	Plekhm3
chr1	65087304	65087821	-8230	NM_001310617	Intergenic	Akr1cl
chr1	65098437	65098753	-858	NM_007777	promoter-TSS	Cryge
chr1	65114263	65114839	-4537	NM_007776	Intergenic	Crygd
chr1	65149991	65150317	-217	NM_007774	promoter-TSS	Cryga
chr1	65159357	65159735	-9609	NM_007774	intron	Cryga
chr1	65224506	65226145	390	NM_010497	intron	Idh1
chr1	65232820	65233687	-5	NM_011086	promoter-TSS	Pikfyve
chr1	65468989	65469484	111406	NM_139270	Intergenic	Pth2r
chr1	65582358	65582720	224708	NM_139270	Intergenic	Pth2r
chr1	65846466	65847208	-126259	NM_027010	Intergenic	Crygf
chr1	66050551	66050796	77578	NM_027010	Intergenic	Crygf
chr1	66220185	66220648	-1486	NM_008632	Intergenic	Map2
chr1	66220987	66221926	-446	NM_008632	promoter-TSS	Map2
chr1	66270003	66270283	48240	NM_001039934	intron	Map2
chr1	66313017	66313421	-55079	NM_001310634	intron	Map2
chr1	66375407	66375727	7269	NM_001310634	intron	Map2
chr1	66433381	66433713	65249	NM_001310634	intron	Map2
chr1	66474320	66474807	-40457	NM_175510	intron	Unc80
chr1	66514320	66514658	-532	NM_175510	promoter-TSS	Unc80
chr1	66745936	66747981	-446	NM_025683	promoter-TSS	Rpe
chr1	66751238	66751486	3957	NM_001310644	intron	Rpe
chr1	66863254	66864583	250	NM_177645	intron	Kansl1l
chr1	66909275	66910221	135	NM_007381	exon	Acadl
chr1	66956671	66956925	25142	NM_001113387	Intergenic	Myl1
chr1	66958613	66959682	22792	NM_001113387	Intergenic	Myl1
chr1	67007000	67007859	-15800	NM_021285	Intergenic	Myl1
chr1	67034359	67034916	-43008	NM_021285	Intergenic	Myl1
chr1	67085046	67085296	237	NM_001190984	5'UTR	Lancl1
chr1	67180154	67180394	10673	NM_001080809	intron	Cps1
chr1	67458105	67458467	288685	NM_001080809	Intergenic	Cps1
chr1	67841532	67842023	672177	NM_001080809	Intergenic	Cps1
chr1	67973896	67974198	804446	NM_001080809	Intergenic	Cps1
chr1	67982197	67982845	812920	NM_001080809	Intergenic	Cps1
chr1	68029482	68029854	860067	NM_001080809	Intergenic	Cps1
chr1	68350842	68351537	803443	NM_010154	intron	Erbb4
chr1	68380119	68380799	774174	NM_010154	intron	Erbb4
chr1	69152018	69152814	2217	NM_010154	intron	Erbb4
chr1	69168051	69168292	-13539	NM_010154	Intergenic	Erbb4
chr1	69675991	69676457	56310	NM_011770	intron	Ikzf2
chr1	69703486	69703899	28841	NM_011770	intron	Ikzf2
chr1	69770565	69771004	-38251	NM_011770	Intergenic	Ikzf2
chr1	71082025	71082705	67181	NM_007525	intron	Bard1
chr1	71083460	71084024	65804	NM_007525	intron	Bard1
chr1	71143475	71144120	5748	NM_007525	intron	Bard1
chr1	71146337	71146578	3088	NM_007525	intron	Bard1
chr1	71149116	71150537	-281	NM_007525	promoter-TSS	Bard1
chr1	71164851	71165692	-15726	NM_007525	Intergenic	Bard1
chr1	71268108	71268449	-118733	NM_007525	Intergenic	Bard1
chr1	71534020	71534288	-69576	NM_026195	Intergenic	Atic
chr1	71553796	71554045	-49809	NM_026195	Intergenic	Atic
chr1	71578192	71578572	-25348	NM_026195	Intergenic	Atic
chr1	71603384	71604494	209	NM_026195	intron	Atic
chr1	71615414	71615816	11885	NM_026195	exon	Atic
chr1	71681709	71681992	17957	NM_010233	intron	Fn1
chr1	71682225	71682470	17460	NM_010233	intron	Fn1
chr1	71691882	71693364	7185	NM_010233	intron	Fn1
chr1	71693867	71694129	5810	NM_010233	intron	Fn1
chr1	71694673	71695213	4865	NM_010233	intron	Fn1
chr1	71697107	71698402	2053	NM_010233	intron	Fn1
chr1	71698871	71700548	98	NM_010233	promoter-TSS	Fn1
chr1	71718901	71720787	19935	NR_040308	Intergenic	Apol7d
chr1	71738782	71739551	39258	NR_040308	Intergenic	Apol7d
chr1	71750058	71750541	50391	NR_040308	Intergenic	Apol7d
chr1	71785701	71786147	86015	NR_040308	Intergenic	Apol7d
chr1	71787820	71788143	88073	NR_040308	Intergenic	Apol7d
chr1	71824125	71824423	-110412	NR_027658	Intergenic	Gm8883
chr1	71846756	71847284	-87666	NR_027658	Intergenic	Gm8883
chr1	72013905	72014451	37591	NR_040454	intron	4933417E11Rik
chr1	72052612	72052872	-973	NR_040454	promoter-TSS	4933417E11Rik
chr1	72055801	72056359	-4311	NR_040454	Intergenic	4933417E11Rik
chr1	72060714	72061070	-9123	NR_040454	Intergenic	4933417E11Rik
chr1	72064131	72064926	-12760	NR_040454	Intergenic	4933417E11Rik
chr1	72194417	72194764	64290	NM_001005423	Intergenic	Mreg
chr1	72219401	72220718	38821	NM_001005423	intron	Mreg
chr1	72221484	72221780	37249	NM_001005423	intron	Mreg
chr1	72229384	72230271	29053	NM_001005423	intron	Mreg
chr1	72251543	72252528	6845	NM_001005423	intron	Mreg
chr1	72253858	72254264	4820	NM_001005423	intron	Mreg
chr1	72257160	72257746	1428	NM_001005423	intron	Mreg
chr1	72258235	72259311	108	NM_001005423	5'UTR	Mreg
chr1	72260416	72261217	-1936	NM_001005423	Intergenic	Mreg
chr1	72263487	72263752	-4739	NM_001005423	Intergenic	Mreg
chr1	72265819	72266264	-7161	NM_001005423	Intergenic	Mreg
chr1	72266527	72267036	-7901	NM_001005423	Intergenic	Mreg
chr1	72272397	72273469	-14052	NM_001005423	Intergenic	Mreg
chr1	72275025	72276231	-16747	NM_001005423	Intergenic	Mreg
chr1	72282796	72283424	-24229	NM_001005423	Intergenic	Mreg
chr1	72283679	72283945	-24931	NM_001005423	Intergenic	Mreg
chr1	72289099	72289738	-30538	NM_001005423	Intergenic	Mreg
chr1	72290268	72291542	-32024	NM_001005423	Intergenic	Mreg
chr1	72294651	72294932	-35911	NM_001005423	Intergenic	Mreg
chr1	72295191	72295559	35513	NM_023523	Intergenic	Pecr
chr1	72300883	72302777	29058	NM_023523	Intergenic	Pecr
chr1	72312020	72312341	18707	NM_023523	intron	Pecr
chr1	72330612	72330947	108	NM_023523	promoter-TSS	Pecr
chr1	72353641	72354766	209	NM_009533	intron	Xrcc5
chr1	72356319	72356701	2515	NM_009533	intron	Xrcc5
chr1	72359279	72360305	5797	NM_009533	intron	Xrcc5
chr1	72360587	72360832	6715	NM_009533	intron	Xrcc5
chr1	72363421	72363821	9626	NM_009533	intron	Xrcc5
chr1	72424707	72425037	70877	NM_009533	intron	Xrcc5
chr1	72435880	72436199	82045	NM_009533	intron	Xrcc5
chr1	72461257	72461652	107460	NM_009533	Intergenic	Xrcc5
chr1	72473048	72473345	109941	NM_001045533	TTS	2019-03-04
chr1	72536794	72537939	45771	NM_001045533	intron	2019-03-04
chr1	72620657	72621150	-8921	NM_018817	Intergenic	Smarcal1
chr1	72624007	72624315	-5664	NM_018817	Intergenic	Smarcal1
chr1	72629823	72630176	175	NM_018817	5'UTR	Smarcal1
chr1	72718699	72719188	28194	NM_176980	intron	Ankar
chr1	72757527	72757772	-184	NM_009084	promoter-TSS	Rpl37a
chr1	72758018	72758438	394	NM_009084	intron	Rpl37a
chr1	72758960	72759211	1252	NM_009084	intron	Rpl37a
chr1	72759325	72759577	1617	NM_009084	intron	Rpl37a
chr1	72787953	72788388	30337	NM_009084	Intergenic	Rpl37a
chr1	72800427	72800698	42729	NM_009084	Intergenic	Rpl37a
chr1	72825303	72825770	-45517	NM_008342	Intergenic	Igfbp2
chr1	72837333	72837583	-33596	NM_008342	Intergenic	Igfbp2
chr1	72838819	72840353	-31468	NM_008342	Intergenic	Igfbp2
chr1	72852036	72853233	-18419	NM_008342	Intergenic	Igfbp2
chr1	72857652	72857989	-13233	NM_008342	Intergenic	Igfbp2
chr1	72869817	72871822	-234	NM_008342	promoter-TSS	Igfbp2
chr1	72872504	72873009	796	NM_001310659	intron	Igfbp2
chr1	72873117	72873600	1398	NM_001310659	intron	Igfbp2
chr1	72873913	72875050	2521	NM_001310659	intron	Igfbp2
chr1	72905636	72905919	15661	NM_010518	3'UTR	Igfbp5
chr1	72912341	72912803	8867	NM_010518	intron	Igfbp5
chr1	72916453	72917169	4628	NM_010518	intron	Igfbp5
chr1	72917461	72918064	3676	NM_010518	intron	Igfbp5
chr1	72918412	72918658	2904	NM_010518	intron	Igfbp5
chr1	72920169	72920485	1112	NM_010518	intron	Igfbp5
chr1	72921532	72921824	-239	NM_010518	promoter-TSS	Igfbp5
chr1	72926777	72927461	-5680	NM_010518	Intergenic	Igfbp5
chr1	72983231	72983478	-61916	NM_010518	Intergenic	Igfbp5
chr1	72991541	72992373	70516	NM_009407	Intergenic	Tnp1
chr1	73006375	73007456	55557	NM_009407	Intergenic	Tnp1
chr1	73010031	73010428	52243	NM_009407	Intergenic	Tnp1
chr1	73107067	73107476	36112	NR_038002	Intergenic	1700027A15Rik
chr1	73171924	73172648	101126	NR_038002	Intergenic	1700027A15Rik
chr1	73410392	73411039	-34826	NR_040605	Intergenic	D530049I02Rik
chr1	73436568	73436957	-8779	NR_040605	Intergenic	D530049I02Rik
chr1	73569804	73570269	-115894	NR_003202	Intergenic	Pinc
chr1	73572270	73572621	-118303	NR_003202	Intergenic	Pinc
chr1	73689092	73689809	212698	NR_105769	intron	Mir6351
chr1	73728363	73728709	173613	NR_105769	intron	Mir6351
chr1	73909076	73909577	1713	NR_045311	non-coding	6030407O03Rik
chr1	73927199	73927594	-16357	NR_045311	Intergenic	6030407O03Rik
chr1	73948241	73948781	-37471	NR_045311	Intergenic	6030407O03Rik
chr1	73978454	73978694	-67534	NR_045311	intron	6030407O03Rik
chr1	73979291	73980052	-68632	NR_045311	intron	6030407O03Rik
chr1	73994086	73994534	-83270	NR_045311	intron	6030407O03Rik
chr1	74009598	74009957	-98738	NR_045311	intron	6030407O03Rik
chr1	74013002	74013695	-102309	NR_045311	intron	6030407O03Rik
chr1	74074308	74075420	96157	NM_027884	intron	Tns1
chr1	74077719	74078111	93106	NM_027884	intron	Tns1
chr1	74083327	74083767	87474	NM_027884	intron	Tns1
chr1	74114978	74115282	55891	NM_027884	intron	Tns1
chr1	74130790	74131396	39928	NM_027884	intron	Tns1
chr1	74137639	74138189	33107	NM_027884	intron	Tns1
chr1	74138425	74139339	32139	NM_027884	intron	Tns1
chr1	74141227	74142463	29176	NM_027884	intron	Tns1
chr1	74145228	74145543	25635	NM_027884	intron	Tns1
chr1	74152860	74153218	17982	NM_027884	intron	Tns1
chr1	74157454	74158701	12943	NM_027884	intron	Tns1
chr1	74226112	74226779	14759	NM_178241	Intergenic	Cxcr1
chr1	74251518	74252065	1402	NR_035449	Intergenic	Mir1928
chr1	74255518	74256092	-2611	NR_035449	Intergenic	Mir1928
chr1	74258851	74259110	-5787	NR_035449	Intergenic	Mir1928
chr1	74282569	74283325	-177	NM_029711	promoter-TSS	Arpc2
chr1	74286267	74286655	3337	NM_029711	intron	Arpc2
chr1	74292155	74292512	9210	NM_029711	intron	Arpc2
chr1	74303190	74303962	20452	NM_029711	intron	Arpc2
chr1	74330709	74331206	354	NM_146110	promoter-TSS	Aamp
chr1	74331472	74332326	291	NM_001039509	promoter-TSS	Pnkd
chr1	74350325	74350868	313	NM_027154	intron	Tmbim1
chr1	74353718	74355366	-3632	NM_027154	intron	Tmbim1
chr1	74355902	74356934	-5508	NM_027154	intron	Tmbim1
chr1	74378764	74379082	-261	NM_019999	promoter-TSS	Pnkd
chr1	74379241	74379815	344	NM_019999	intron	Pnkd
chr1	74381256	74382106	2497	NM_019999	intron	Pnkd
chr1	74384116	74384592	5170	NM_019999	intron	Pnkd
chr1	74390805	74391250	11844	NM_019999	intron	Pnkd
chr1	74423129	74423383	1479	NM_013612	intron	Slc11a1
chr1	74425641	74425994	4041	NM_013612	intron	Slc11a1
chr1	74431880	74432465	-6010	NM_153088	3'UTR	Ctdsp1
chr1	74433158	74433848	-4680	NM_153088	TTS	Ctdsp1
chr1	74436466	74437271	-1314	NM_153088	Intergenic	Ctdsp1
chr1	74437580	74439259	237	NM_153088	5'UTR	Ctdsp1
chr1	74443515	74444319	3033	NR_029743	TTS	Mir26b
chr1	74444558	74444902	3846	NR_029743	TTS	Mir26b
chr1	74461684	74462009	5889	NM_009509	intron	Vil1
chr1	74466177	74466417	10339	NM_009509	intron	Vil1
chr1	74552510	74553346	294	NM_021383	promoter-TSS	Cnot9
chr1	74616999	74617239	17483	NM_001310668	exon	Zfp142
chr1	74634236	74634954	7	NM_001310668	promoter-TSS	Zfp142
chr1	74707918	74708610	-64	NM_001014974	promoter-TSS	Ttll4
chr1	74759661	74759995	-281	NM_024264	promoter-TSS	Cyp27a1
chr1	74818337	74818612	9	NM_009526	promoter-TSS	Wnt6
chr1	74825547	74826048	7332	NM_009526	intron	Wnt6
chr1	74841139	74841896	2925	NM_009518	intron	Wnt10a
chr1	74849629	74850050	11247	NM_009518	exon	Wnt10a
chr1	74852961	74853206	14491	NM_009518	Intergenic	Wnt10a
chr1	74853726	74853971	15256	NM_009518	Intergenic	Wnt10a
chr1	74854603	74854991	16204	NM_009518	Intergenic	Wnt10a
chr1	74863544	74864035	25197	NM_009518	Intergenic	Wnt10a
chr1	74871018	74872157	-30015	NM_009872	Intergenic	Cdk5r2
chr1	74897837	74898719	-3325	NM_009872	Intergenic	Cdk5r2
chr1	74901216	74902159	85	NM_009872	promoter-TSS	Cdk5r2
chr1	74904613	74905046	3227	NM_009872	TTS	Cdk5r2
chr1	74939686	74940039	-146	NM_021541	promoter-TSS	Cryba2
chr1	75018185	75018582	-20138	NM_010544	intron	Ihh
chr1	75073416	75074087	48048	NM_029342	intron	Nhej1
chr1	75121131	75121691	389	NM_029342	TTS	Nhej1
chr1	75139162	75139476	-41	NM_170755	promoter-TSS	Fam134a
chr1	75165034	75165893	155	NM_026846	exon	Zfand2b
chr1	75176369	75177536	13	NM_023732	promoter-TSS	Abcb6
chr1	75188327	75189020	-60	NM_001267620	promoter-TSS	Ankzf1
chr1	75205450	75206003	1626	NM_029010	exon	Glb1l
chr1	75207097	75207675	-18	NR_102731	promoter-TSS	Stk16
chr1	75215439	75215714	292	NM_001313723	intron	Tuba4a
chr1	75223768	75224661	-3986	NM_001243091	intron	A630095N17Rik
chr1	75232817	75233627	-55	NM_001159885	promoter-TSS	Dnajb2
chr1	75236311	75236708	3233	NM_001159885	intron	Dnajb2
chr1	75243185	75243769	10200	NM_001159885	TTS	Dnajb2
chr1	75248158	75248709	12349	NM_008985	exon	Ptprn
chr1	75302093	75303357	10867	NM_016878	Intergenic	Dnpep
chr1	75313654	75313943	-207	NM_016878	promoter-TSS	Dnpep
chr1	75314335	75314917	-414	NM_001110831	promoter-TSS	Dnpep
chr1	75340978	75341335	-15710	NM_010043	Intergenic	Des
chr1	75341934	75342290	-14755	NM_010043	Intergenic	Des
chr1	75346064	75346377	-10646	NM_010043	Intergenic	Des
chr1	75367883	75368128	3584	NR_037976	intron	Gm15179
chr1	75377523	75379389	-233	NM_001085371	promoter-TSS	Speg
chr1	75384192	75384504	2163	NM_001085370	intron	Speg
chr1	75395256	75395764	-1150	NM_001173477	intron	Speg
chr1	75410376	75410661	13859	NM_001173477	intron	Speg
chr1	75422270	75422600	-10083	NM_133708	intron	Gmppa
chr1	75432454	75432771	95	NM_133708	promoter-TSS	Gmppa
chr1	75443976	75444439	-2877	NM_183022	Intergenic	Asic4
chr1	75455009	75455408	8124	NM_183022	intron	Asic4
chr1	75475483	75476235	187	NM_001001565	promoter-TSS	Chpf
chr1	75477532	75477781	1550	NM_177056	intron	Tmem198
chr1	75489070	75489519	13188	NM_177056	exon	Tmem198
chr1	75491524	75491799	11365	NM_178884	intron	Obsl1
chr1	75508568	75508813	5039	NM_010564	Intergenic	Inha
chr1	75517767	75518551	55	NM_027886	promoter-TSS	Stk11ip
chr1	75542343	75543807	234	NM_009208	intron	Slc4a3
chr1	75555951	75556204	13237	NM_009208	TTS	Slc4a3
chr1	75585205	75586044	42784	NM_009208	Intergenic	Slc4a3
chr1	75598052	75598775	55573	NM_009208	Intergenic	Slc4a3
chr1	75650237	75650754	107655	NM_009208	Intergenic	Slc4a3
chr1	75659076	75660018	116706	NM_009208	Intergenic	Slc4a3
chr1	75664136	75664998	121726	NM_009208	Intergenic	Slc4a3
chr1	75701310	75701710	158669	NM_009208	Intergenic	Slc4a3
chr1	75801019	75801457	258397	NM_009208	Intergenic	Slc4a3
chr1	75884979	75885681	342489	NM_009208	Intergenic	Slc4a3
chr1	75933159	75933784	390631	NM_009208	Intergenic	Slc4a3
chr1	75977810	75978257	435193	NM_009208	Intergenic	Slc4a3
chr1	76025391	76026508	-459758	NR_038012	Intergenic	Gm17751
chr1	76027991	76028283	-457571	NR_038012	Intergenic	Gm17751
chr1	76032629	76033586	-452600	NR_038012	Intergenic	Gm17751
chr1	76035679	76036117	-449810	NR_038012	Intergenic	Gm17751
chr1	76078962	76079317	-406568	NR_038012	Intergenic	Gm17751
chr1	76127004	76127327	-358542	NR_038012	Intergenic	Gm17751
chr1	76388995	76389287	-96567	NR_038012	Intergenic	Gm17751
chr1	76645924	76646544	140099	NR_105761	Intergenic	Mir6343
chr1	76687630	76687881	181621	NR_105761	Intergenic	Mir6343
chr1	76903886	76904758	398187	NR_105761	Intergenic	Mir6343
chr1	77078393	77078985	414654	NR_105770	Intergenic	Mir6352
chr1	77216324	77216610	276876	NR_105770	Intergenic	Mir6352
chr1	77256212	77256724	236875	NR_105770	Intergenic	Mir6352
chr1	77309571	77309828	183643	NR_105770	Intergenic	Mir6352
chr1	77383410	77383687	109794	NR_105770	intron	Mir6352
chr1	77409478	77410313	83447	NR_105770	intron	Mir6352
chr1	77410449	77410697	82770	NR_105770	intron	Mir6352
chr1	77416647	77417223	76408	NR_105770	intron	Mir6352
chr1	77437006	77437539	56070	NR_105770	intron	Mir6352
chr1	77437940	77439207	54769	NR_105770	intron	Mir6352
chr1	77442439	77444168	50039	NR_105770	intron	Mir6352
chr1	77448894	77449666	44063	NR_105770	intron	Mir6352
chr1	77450293	77451024	42684	NR_105770	intron	Mir6352
chr1	77453144	77454070	39736	NR_105770	intron	Mir6352
chr1	77455699	77455962	37512	NR_105770	intron	Mir6352
chr1	77458091	77458453	35071	NR_105770	intron	Mir6352
chr1	77458611	77459029	34523	NR_105770	intron	Mir6352
chr1	77463930	77464202	29277	NR_105770	intron	Mir6352
chr1	77468904	77470391	23695	NR_105770	intron	Mir6352
chr1	77470577	77471020	22544	NR_105770	intron	Mir6352
chr1	77471488	77471728	21735	NR_105770	intron	Mir6352
chr1	77493143	77493851	-154	NR_105770	promoter-TSS	Mir6352
chr1	77498953	77499827	-6047	NR_105770	intron	Mir6352
chr1	77502762	77503043	8760	NM_007936	intron	Epha4
chr1	77508655	77509690	2490	NM_007936	intron	Epha4
chr1	77510086	77510461	1389	NM_007936	intron	Epha4
chr1	77510785	77511894	323	NM_007936	intron	Epha4
chr1	77512286	77512609	-785	NM_007936	promoter-TSS	Epha4
chr1	77512758	77513601	-1517	NM_007936	Intergenic	Epha4
chr1	77626281	77626793	-114874	NM_007936	Intergenic	Epha4
chr1	77709401	77709841	-197958	NM_007936	Intergenic	Epha4
chr1	77943725	77944082	249807	NM_008781	Intergenic	Pax3
chr1	77955938	77956179	237652	NM_008781	Intergenic	Pax3
chr1	77968766	77969266	224695	NM_008781	Intergenic	Pax3
chr1	78116496	78117012	76957	NM_008781	intron	Pax3
chr1	78164553	78164982	28943	NM_008781	intron	Pax3
chr1	78186083	78186480	7429	NM_008781	intron	Pax3
chr1	78187143	78187494	6392	NM_008781	intron	Pax3
chr1	78307257	78307707	561	NM_001004173	intron	Sgpp2
chr1	78350794	78351034	43993	NM_001004173	intron	Sgpp2
chr1	78351726	78351984	44934	NM_001004173	intron	Sgpp2
chr1	78384501	78385130	77895	NM_001004173	intron	Sgpp2
chr1	78385326	78385804	78644	NM_001004173	intron	Sgpp2
chr1	78482548	78482793	2801	NR_102758	intron	Farsb
chr1	78485423	78486149	-314	NR_102757	promoter-TSS	Farsb
chr1	78564493	78565129	57176	NM_026713	Intergenic	Mogat1
chr1	78598057	78599217	-55763	NM_001033606	Intergenic	Acsl3
chr1	78645830	78646242	-8364	NM_001033606	Intergenic	Acsl3
chr1	78651041	78651483	-3138	NM_001033606	Intergenic	Acsl3
chr1	78653744	78655454	199	NM_001001981	promoter-TSS	Utp14b
chr1	78655623	78656299	946	NM_001136226	intron	Utp14b
chr1	78657909	78658279	3079	NM_001136226	intron	Utp14b
chr1	78661191	78661666	6414	NM_001136226	exon	Utp14b
chr1	79446616	79446998	-10142	NM_001310680	Intergenic	Scg2
chr1	79450613	79451584	-14434	NM_001310680	Intergenic	Scg2
chr1	79577677	79578249	90584	NM_183027	Intergenic	Ap1s3
chr1	79599064	79599392	69319	NM_183027	Intergenic	Ap1s3
chr1	79661762	79662058	6637	NM_183027	intron	Ap1s3
chr1	79664162	79664407	4262	NM_183027	intron	Ap1s3
chr1	79668246	79668874	-13	NM_183027	promoter-TSS	Ap1s3
chr1	79772456	79773169	220	NM_001081210	exon	Mrpl44
chr1	79854918	79855729	-84	NM_009255	promoter-TSS	Serpine2
chr1	80147285	80147636	63058	NM_173425	Intergenic	Fam124b
chr1	80232729	80233219	-22455	NM_173425	Intergenic	Fam124b
chr1	80233348	80233588	-22949	NM_173425	Intergenic	Fam124b
chr1	80233716	80234651	-23665	NM_173425	Intergenic	Fam124b
chr1	80249876	80250207	-39523	NM_173425	Intergenic	Fam124b
chr1	80312242	80312709	24789	NM_001313728	intron	Cul3
chr1	80319913	80320166	17225	NM_001313728	intron	Cul3
chr1	80336649	80336889	496	NM_001313728	intron	Cul3
chr1	80337117	80337719	-153	NM_016716	promoter-TSS	Cul3
chr1	80378010	80378252	-40866	NM_016716	Intergenic	Cul3
chr1	80399740	80400451	-42411	NR_040460	Intergenic	1700016L21Rik
chr1	81589872	81590485	516287	NM_172849	Intergenic	Nyap2
chr1	81606257	81606567	-522079	NR_105762	Intergenic	Mir6344
chr1	82004469	82004745	-123884	NR_105762	Intergenic	Mir6344
chr1	82279442	82281199	7693	NM_010570	intron	Irs1
chr1	82286664	82288644	360	NM_010570	5'UTR	Irs1
chr1	82288761	82289644	-1189	NM_010570	Intergenic	Irs1
chr1	82312862	82313102	-172	NM_029777	promoter-TSS	Rhbdd1
chr1	82313274	82313738	352	NM_029777	intron	Rhbdd1
chr1	82320889	82321221	7901	NM_029777	intron	Rhbdd1
chr1	82356865	82357206	21412	NM_001122685	intron	Rhbdd1
chr1	82721772	82722116	479	NM_001310699	intron	Mff
chr1	82767557	82767997	-2746	NM_025453	Intergenic	Tm4sf20
chr1	82816782	82817745	-18771	NM_001310713	Intergenic	Agfg1
chr1	82823375	82823943	-12376	NM_001310713	Intergenic	Agfg1
chr1	82835467	82837521	459	NM_010472	intron	Agfg1
chr1	82853764	82854090	17892	NM_010472	intron	Agfg1
chr1	82945147	82945664	89617	NM_030556	Intergenic	Slc19a3
chr1	83034386	83035178	241	NM_030556	intron	Slc19a3
chr1	83404391	83404786	186	NM_172430	5'UTR	Sphkap
chr1	83531991	83532363	-127402	NM_172430	Intergenic	Sphkap
chr1	84031794	84032050	183614	NR_105771	TTS	Mir6353
chr1	84100018	84100317	115368	NR_105771	intron	Mir6353
chr1	84150564	84151119	64694	NR_105771	intron	Mir6353
chr1	84173353	84174216	41751	NR_105771	intron	Mir6353
chr1	84178864	84179196	36506	NR_105771	intron	Mir6353
chr1	84202108	84202805	13079	NR_105771	intron	Mir6353
chr1	84214335	84214649	1044	NR_105771	TTS	Mir6353
chr1	84267524	84267854	13531	NM_001003948	intron	Pid1
chr1	84279768	84280131	1270	NM_001003948	intron	Pid1
chr1	84280880	84281636	-38	NM_001003948	promoter-TSS	Pid1
chr1	84329086	84330288	-48467	NM_001003948	Intergenic	Pid1
chr1	84401547	84403006	-121057	NM_001003948	intron	Pid1
chr1	84403384	84403793	-122369	NM_001003948	intron	Pid1
chr1	84491095	84491406	-201163	NR_039588	intron	Mir5126
chr1	84496645	84497121	-195531	NR_039588	intron	Mir5126
chr1	84546045	84546851	-145966	NR_039588	intron	Mir5126
chr1	84613128	84613583	-79058	NR_039588	intron	Mir5126
chr1	84633460	84634327	-58520	NR_039588	intron	Mir5126
chr1	84635897	84636168	-56381	NR_039588	intron	Mir5126
chr1	84636857	84637687	-55142	NR_039588	intron	Mir5126
chr1	84692174	84692995	171	NR_039588	TTS	Mir5126
chr1	84829938	84830427	5696	NM_133975	intron	Trip12
chr1	84834981	84836875	-49	NM_133975	promoter-TSS	Trip12
chr1	84837081	84837352	801	NM_025386	intron	Fbxo36
chr1	84844276	84844648	8046	NM_025386	intron	Fbxo36
chr1	84845301	84845730	9100	NM_025386	intron	Fbxo36
chr1	84847356	84847644	11084	NM_025386	intron	Fbxo36
chr1	84848283	84848862	12157	NM_025386	intron	Fbxo36
chr1	84856805	84858109	21041	NM_025386	intron	Fbxo36
chr1	84863597	84863964	27365	NM_025386	intron	Fbxo36
chr1	84865130	84866012	29155	NM_025386	intron	Fbxo36
chr1	84866181	84866490	29920	NM_025386	intron	Fbxo36
chr1	84868249	84869281	32349	NM_025386	intron	Fbxo36
chr1	84869442	84869969	33290	NM_025386	intron	Fbxo36
chr1	84878661	84879177	42503	NM_025386	intron	Fbxo36
chr1	84886203	84887234	44939	NM_027921	intron	Slc16a14
chr1	84920835	84921117	10682	NM_027921	intron	Slc16a14
chr1	84930210	84931845	630	NM_027921	intron	Slc16a14
chr1	84958345	84958670	-26850	NM_027921	Intergenic	Slc16a14
chr1	87544338	87544778	-2005	NM_001313713	Intergenic	Sp100
chr1	87689910	87690478	172	NM_133781	5'UTR	Cab39
chr1	87690847	87691517	1160	NM_133781	intron	Cab39
chr1	87735869	87736295	46060	NM_133781	intron	Cab39
chr1	87790995	87791475	150	NM_022417	5'UTR	Itm2c
chr1	87791577	87791991	699	NM_022417	intron	Itm2c
chr1	87805148	87806191	14585	NM_022417	TTS	Itm2c
chr1	87811025	87811460	-13815	NR_037692	Intergenic	4933407L21Rik
chr1	87830084	87830637	5303	NR_037692	Intergenic	4933407L21Rik
chr1	87873240	87873490	-15735	NM_001033290	Intergenic	Gpr55
chr1	87904218	87904720	-14048	NM_001122732	Intergenic	Spata3
chr1	87921118	87921358	2721	NM_027029	TTS	Spata3
chr1	87928985	87929234	10593	NM_027029	Intergenic	Spata3
chr1	87959241	87959597	-1775	NM_027357	Intergenic	Psmd1
chr1	87961365	87961645	311	NM_027357	intron	Psmd1
chr1	88051137	88051689	58	NM_001310702	promoter-TSS	Armc9
chr1	88078817	88079200	27654	NM_001310702	intron	Armc9
chr1	88083950	88086017	33629	NM_001310702	intron	Armc9
chr1	88097665	88098416	46686	NM_001310702	intron	Armc9
chr1	88132625	88133581	-66693	NM_145222	intron	B3gnt7
chr1	88191497	88191815	-8140	NM_145222	Intergenic	B3gnt7
chr1	88196714	88197191	-2843	NM_145222	Intergenic	B3gnt7
chr1	88199631	88200539	289	NM_145222	5'UTR	B3gnt7
chr1	88204778	88206791	5989	NM_145222	Intergenic	B3gnt7
chr1	88207025	88208627	8030	NM_145222	Intergenic	B3gnt7
chr1	88210006	88210443	10429	NM_145222	Intergenic	B3gnt7
chr1	88245314	88246003	2201	NR_028478	3'UTR	Snora75
chr1	88254711	88254951	1199	NM_010880	intron	Ncl
chr1	88255278	88255972	405	NM_010880	promoter-TSS	Ncl
chr1	88256360	88257006	534	NR_015507	promoter-TSS	C130036L24Rik
chr1	88277585	88277893	6977	NM_010341	Intergenic	Nmur1
chr1	88317655	88317931	-5111	NM_027966	Intergenic	1700019O17Rik
chr1	88330846	88331525	8282	NM_027966	Intergenic	1700019O17Rik
chr1	88336729	88337619	14270	NM_027966	Intergenic	1700019O17Rik
chr1	88338169	88341048	16705	NM_027966	Intergenic	1700019O17Rik
chr1	88368145	88369593	45965	NM_027966	Intergenic	1700019O17Rik
chr1	88373049	88373343	-50115	NM_008972	Intergenic	Ptma
chr1	88383282	88383717	-39811	NM_008972	Intergenic	Ptma
chr1	88384048	88385829	-38372	NM_008972	Intergenic	Ptma
chr1	88386098	88386678	-36923	NM_008972	Intergenic	Ptma
chr1	88388246	88389325	-34525	NM_008972	Intergenic	Ptma
chr1	88390737	88390977	-32454	NM_008972	Intergenic	Ptma
chr1	88394063	88395197	-28681	NM_008972	Intergenic	Ptma
chr1	88398508	88398815	-24649	NM_008972	Intergenic	Ptma
chr1	88398995	88399844	-23891	NM_008972	Intergenic	Ptma
chr1	88399991	88401487	-22572	NM_008972	Intergenic	Ptma
chr1	88401736	88402472	-21207	NM_008972	Intergenic	Ptma
chr1	88405577	88406444	-17300	NM_008972	Intergenic	Ptma
chr1	88408573	88408938	-14555	NM_008972	Intergenic	Ptma
chr1	88418437	88419338	-4423	NM_008972	Intergenic	Ptma
chr1	88420385	88421864	-2186	NM_008972	Intergenic	Ptma
chr1	88422322	88425342	521	NM_008972	intron	Ptma
chr1	88428080	88429176	5317	NM_008972	Intergenic	Ptma
chr1	88446267	88446977	23311	NM_008972	intron	Ptma
chr1	88478893	88479358	-50	NM_008801	promoter-TSS	Pde6d
chr1	88483216	88483869	-132	NM_172974	promoter-TSS	Cops7b
chr1	88528323	88528600	38686	NM_010933	Intergenic	Nppc
chr1	88543969	88544705	22811	NM_010933	Intergenic	Nppc
chr1	88566606	88567207	241	NM_010933	intron	Nppc
chr1	88600038	88600911	96	NM_001172157	promoter-TSS	Dis3l2
chr1	88615635	88616391	15634	NM_001172157	intron	Dis3l2
chr1	88646189	88646868	46150	NM_001172157	intron	Dis3l2
chr1	88649945	88650479	49833	NM_001172157	intron	Dis3l2
chr1	88654456	88655035	54367	NM_001172157	intron	Dis3l2
chr1	88755411	88756319	155486	NM_001172157	intron	Dis3l2
chr1	88814550	88814937	171759	NM_007433	intron	Alppl2
chr1	89059155	89059707	-6500	NM_021306	Intergenic	Ecel1
chr1	89071075	89071320	-8691	NM_027084	Intergenic	Prss56
chr1	89072493	89073165	-7060	NM_027084	Intergenic	Prss56
chr1	89081747	89082494	2232	NM_027084	exon	Prss56
chr1	89110221	89111752	473	NM_001039169	5'UTR	Eif4e2
chr1	89121303	89123946	12111	NM_001039169	intron	Eif4e2
chr1	89126758	89127834	16782	NM_001039169	intron	Eif4e2
chr1	89139614	89140107	-21078	NM_028889	Intergenic	Efhd1
chr1	89142991	89143605	-17641	NM_028889	Intergenic	Efhd1
chr1	89194044	89194438	-29332	NM_146112	exon	Gigyf2
chr1	89223003	89223885	-129	NM_146112	promoter-TSS	Gigyf2
chr1	89329384	89329705	-37294	NM_028473	intron	3110079O15Rik
chr1	89371908	89372432	5331	NM_028473	TTS	3110079O15Rik
chr1	89406742	89407055	38	NM_019867	promoter-TSS	Ngef
chr1	89447526	89447816	22774	NM_001111314	intron	Ngef
chr1	89554791	89555247	38132	NM_001110193	intron	Inpp5d
chr1	89570242	89571107	53788	NM_001110193	intron	Inpp5d
chr1	89572232	89573122	55790	NM_001110193	intron	Inpp5d
chr1	89625597	89626188	-26693	NM_029846	Intergenic	Atg16l1
chr1	89652214	89652983	13	NM_001205392	promoter-TSS	Atg16l1
chr1	89713993	89714662	14073	NM_009118	intron	Sag
chr1	89749653	89750166	48	NM_177646	promoter-TSS	Dgkd
chr1	89966128	89966495	-1042	NM_201644	intron	Ugt1a9
chr1	90116975	90117321	-6447	NM_001281466	TTS	Mroh2a
chr1	90159020	90159502	6722	NR_040291	TTS	6430706D22Rik
chr1	90169421	90169847	-3651	NR_040291	intron	6430706D22Rik
chr1	90173528	90174340	198	NM_172505	intron	A730008H23Rik
chr1	90254115	90254465	-49295	NM_029269	intron	Spp2
chr1	90360942	90361564	45388	NM_008132	Intergenic	Glrp1
chr1	90363157	90363720	43202	NM_008132	Intergenic	Glrp1
chr1	90371285	90371525	35236	NM_008132	Intergenic	Glrp1
chr1	90410176	90410582	-3738	NM_008132	Intergenic	Glrp1
chr1	90498727	90499056	50800	NR_037971	Intergenic	Gm19589
chr1	90502270	90502690	54388	NR_037971	Intergenic	Gm19589
chr1	90509244	90510247	61654	NR_037971	Intergenic	Gm19589
chr1	90542269	90542615	56324	NM_177305	Intergenic	Arl4c
chr1	90565344	90566326	32931	NM_177305	Intergenic	Arl4c
chr1	90570548	90570788	28098	NM_177305	Intergenic	Arl4c
chr1	90575037	90575320	23587	NM_177305	Intergenic	Arl4c
chr1	90598195	90599274	31	NM_177305	promoter-TSS	Arl4c
chr1	90642029	90642278	-9311	NR_040493	Intergenic	Platr5
chr1	90647215	90647528	-4093	NR_040493	Intergenic	Platr5
chr1	90648831	90649142	-2478	NR_040493	Intergenic	Platr5
chr1	90657290	90657670	6015	NR_040493	Intergenic	Platr5
chr1	90670747	90671535	19676	NR_040493	Intergenic	Platr5
chr1	90696047	90696332	44725	NR_040493	Intergenic	Platr5
chr1	90696658	90697721	45725	NR_040493	Intergenic	Platr5
chr1	90703260	90704111	52221	NR_040493	Intergenic	Platr5
chr1	90706215	90706933	55109	NR_040493	Intergenic	Platr5
chr1	90709832	90710341	58622	NR_040493	Intergenic	Platr5
chr1	90735965	90736508	84772	NR_040493	Intergenic	Platr5
chr1	90818213	90818770	-94196	NR_040471	Intergenic	1700067G17Rik
chr1	90820537	90821260	-91789	NR_040471	Intergenic	1700067G17Rik
chr1	90853936	90854388	-58526	NR_040471	Intergenic	1700067G17Rik
chr1	90869163	90869535	-43339	NR_040471	Intergenic	1700067G17Rik
chr1	90911935	90912628	-406	NR_040471	promoter-TSS	1700067G17Rik
chr1	90921390	90922179	9097	NR_040471	Intergenic	1700067G17Rik
chr1	90925945	90926247	13408	NR_040471	Intergenic	1700067G17Rik
chr1	90954290	90954776	-12504	NM_133816	Intergenic	Sh3bp4
chr1	90965032	90965848	-1597	NM_133816	Intergenic	Sh3bp4
chr1	90966234	90966774	-533	NM_133816	promoter-TSS	Sh3bp4
chr1	90967050	90967390	183	NM_133816	intron	Sh3bp4
chr1	90967564	90967860	675	NM_133816	intron	Sh3bp4
chr1	90968571	90969534	2016	NM_133816	intron	Sh3bp4
chr1	90975375	90975972	8637	NM_133816	intron	Sh3bp4
chr1	90985043	90985799	18384	NM_133816	intron	Sh3bp4
chr1	90988260	90990124	22155	NM_133816	intron	Sh3bp4
chr1	90990965	90991555	24223	NM_133816	intron	Sh3bp4
chr1	90991984	90994024	25967	NM_133816	intron	Sh3bp4
chr1	90998731	90999801	32229	NM_133816	intron	Sh3bp4
chr1	91000682	91000931	33770	NM_133816	intron	Sh3bp4
chr1	91006106	91006844	39438	NM_133816	intron	Sh3bp4
chr1	91008924	91009823	42337	NM_133816	intron	Sh3bp4
chr1	91027562	91028686	61087	NM_133816	intron	Sh3bp4
chr1	91029708	91030581	63108	NM_133816	intron	Sh3bp4
chr1	91079704	91080485	113058	NM_133816	Intergenic	Sh3bp4
chr1	91087276	91088257	120730	NM_133816	Intergenic	Sh3bp4
chr1	91142060	91142451	160452	NR_040482	Intergenic	C030007H22Rik
chr1	91179026	91179556	123417	NR_040482	Intergenic	C030007H22Rik
chr1	91210383	91210681	92176	NR_040482	Intergenic	C030007H22Rik
chr1	91219208	91219459	83374	NR_040482	Intergenic	C030007H22Rik
chr1	91350873	91351775	-62	NM_178119	promoter-TSS	Agap1
chr1	91352034	91352443	853	NM_001037136	intron	Agap1
chr1	91361894	91362779	10951	NM_001037136	intron	Agap1
chr1	91409823	91410579	58815	NM_001037136	intron	Agap1
chr1	91412592	91413416	61618	NM_001037136	intron	Agap1
chr1	91414412	91414935	63288	NM_001037136	intron	Agap1
chr1	91416684	91417253	65583	NM_001037136	intron	Agap1
chr1	91476458	91477179	103648	NR_015540	intron	4933400F21Rik
chr1	91477635	91477987	102656	NR_015540	intron	4933400F21Rik
chr1	91503197	91503659	77039	NR_015540	intron	4933400F21Rik
chr1	91504640	91504983	75655	NR_015540	intron	4933400F21Rik
chr1	91530736	91530982	49608	NR_015540	exon	4933400F21Rik
chr1	91543300	91543756	36939	NR_015540	intron	4933400F21Rik
chr1	91585533	91585917	-5258	NR_015540	intron	4933400F21Rik
chr1	91620725	91621230	-40511	NR_015540	intron	4933400F21Rik
chr1	91621433	91621725	-41112	NR_015540	intron	4933400F21Rik
chr1	91635421	91636381	-55434	NR_015540	intron	4933400F21Rik
chr1	91652731	91653526	-72662	NR_015540	intron	4933400F21Rik
chr1	91720084	91721072	107173	NM_010262	intron	Gbx2
chr1	91756760	91757019	70861	NM_010262	intron	Gbx2
chr1	91767029	91767684	60394	NM_010262	intron	Gbx2
chr1	91772822	91773771	54454	NM_010262	intron	Gbx2
chr1	91775031	91775387	52542	NM_010262	intron	Gbx2
chr1	91782219	91782608	45337	NM_010262	intron	Gbx2
chr1	91819356	91819837	8154	NM_010262	Intergenic	Gbx2
chr1	91826599	91827381	761	NM_010262	exon	Gbx2
chr1	91827488	91827970	22	NM_010262	promoter-TSS	Gbx2
chr1	91832242	91832856	-4798	NM_010262	Intergenic	Gbx2
chr1	91835703	91836125	-8163	NM_010262	Intergenic	Gbx2
chr1	91836369	91837247	-9057	NM_010262	Intergenic	Gbx2
chr1	91864803	91866020	-37661	NM_010262	intron	Gbx2
chr1	91888756	91889124	22212	NM_139152	intron	Asb18
chr1	91923405	91923785	-12443	NM_139152	Intergenic	Asb18
chr1	91956454	91956912	-45531	NM_139152	intron	Asb18
chr1	92010507	92010782	39331	NM_029122	intron	Iqca
chr1	92049961	92050424	-217	NM_029122	promoter-TSS	Iqca
chr1	92089981	92090255	-10437	NM_001271607	Intergenic	Ackr3
chr1	92098502	92101245	-681	NM_001271607	promoter-TSS	Ackr3
chr1	92102000	92102343	1617	NM_007722	intron	Ackr3
chr1	92104829	92105226	4473	NM_007722	intron	Ackr3
chr1	92118527	92118992	18205	NM_007722	Intergenic	Ackr3
chr1	92154873	92155718	54741	NM_007722	Intergenic	Ackr3
chr1	92172687	92173398	72488	NM_007722	Intergenic	Ackr3
chr1	92179553	92180490	79467	NM_007722	Intergenic	Ackr3
chr1	92225660	92226508	125529	NM_007722	Intergenic	Ackr3
chr1	92271806	92272046	171371	NM_007722	Intergenic	Ackr3
chr1	92301290	92302110	-198300	NM_133805	Intergenic	Cops8
chr1	92309028	92309388	-190792	NM_133805	Intergenic	Cops8
chr1	92320401	92321818	-178890	NM_133805	Intergenic	Cops8
chr1	92328293	92328807	-171450	NM_133805	Intergenic	Cops8
chr1	92366479	92366964	-133278	NM_133805	Intergenic	Cops8
chr1	92367144	92367406	-132725	NM_133805	Intergenic	Cops8
chr1	92384551	92384883	-115283	NM_133805	Intergenic	Cops8
chr1	92389792	92390611	-109798	NM_133805	Intergenic	Cops8
chr1	92399644	92400887	-99734	NM_133805	Intergenic	Cops8
chr1	92401500	92401978	-98261	NM_133805	Intergenic	Cops8
chr1	92415326	92416588	-84043	NM_133805	Intergenic	Cops8
chr1	92417619	92417859	-82261	NM_133805	Intergenic	Cops8
chr1	92420232	92420557	-79605	NM_133805	Intergenic	Cops8
chr1	92420668	92421821	-78755	NM_133805	Intergenic	Cops8
chr1	92424282	92425206	-75256	NM_133805	Intergenic	Cops8
chr1	92440366	92441103	-59265	NM_133805	Intergenic	Cops8
chr1	92484684	92485177	-15069	NM_133805	Intergenic	Cops8
chr1	92487490	92487779	-12365	NM_133805	Intergenic	Cops8
chr1	92499404	92500188	-204	NM_133805	promoter-TSS	Cops8
chr1	92518356	92518997	18677	NM_133805	Intergenic	Cops8
chr1	92525088	92525646	25367	NM_133805	Intergenic	Cops8
chr1	92560305	92560572	60439	NM_133805	Intergenic	Cops8
chr1	92652783	92653221	87546	NM_001243009	Intergenic	Col6a3
chr1	92782882	92783811	-28330	NM_053015	Intergenic	Mlph
chr1	92793363	92793682	-18154	NM_053015	Intergenic	Mlph
chr1	92797661	92798365	-13664	NM_053015	Intergenic	Mlph
chr1	92811282	92811730	-171	NM_053015	promoter-TSS	Mlph
chr1	92824700	92824962	13154	NM_053015	intron	Mlph
chr1	92825222	92825489	13679	NM_053015	intron	Mlph
chr1	92855333	92855637	5800	NM_001101647	exon	Prlh
chr1	92866397	92866686	-345	NM_008998	promoter-TSS	Rab17
chr1	92867338	92868446	-1695	NM_008998	Intergenic	Rab17
chr1	92869630	92870118	-3677	NM_008998	Intergenic	Rab17
chr1	92871732	92872246	-5792	NM_008998	Intergenic	Rab17
chr1	92920996	92921385	25887	NM_001111312	intron	Lrrfip1
chr1	92934929	92935671	-14721	NM_001310732	intron	Lrrfip1
chr1	92940563	92941027	-9226	NM_001310732	intron	Lrrfip1
chr1	92949382	92949669	-495	NM_001310732	promoter-TSS	Lrrfip1
chr1	93032145	93032517	-9349	NM_001033408	Intergenic	Rbm44
chr1	93064310	93064838	-11825	NM_016894	intron	Ramp1
chr1	93145908	93146345	-769	NM_026454	promoter-TSS	Ube2f
chr1	93146595	93146969	-114	NM_026454	promoter-TSS	Ube2f
chr1	93196242	93196611	1512	NM_016717	intron	Scly
chr1	93204796	93205269	10118	NM_016717	intron	Scly
chr1	93205394	93205634	10599	NM_016717	intron	Scly
chr1	93209762	93210352	-8595	NM_001033292	intron	Espnl
chr1	93262698	93263112	-102	NM_173395	promoter-TSS	Erfe
chr1	93266062	93267079	3564	NM_173395	intron	Erfe
chr1	93277071	93277492	14275	NM_173395	intron	Erfe
chr1	93294946	93295186	294	NM_023343	intron	Ilkap
chr1	93295343	93295732	-178	NM_023343	promoter-TSS	Ilkap
chr1	93309395	93310415	-106	NM_019479	promoter-TSS	Hes6
chr1	93310544	93311063	-1005	NM_019479	Intergenic	Hes6
chr1	93316842	93317087	-7166	NM_019479	intron	Hes6
chr1	93355643	93356544	-189	NM_011066	promoter-TSS	Per2
chr1	93390775	93391605	-55	NM_028718	promoter-TSS	Traf3ip1
chr1	93424743	93425099	-12221	NM_001039126	3'UTR	Asb1
chr1	93433168	93433408	-3854	NM_001039126	Intergenic	Asb1
chr1	93433618	93435626	-2520	NM_001039126	Intergenic	Asb1
chr1	93436166	93437690	-214	NM_001039126	promoter-TSS	Asb1
chr1	93444151	93444580	6709	NM_023046	intron	Asb1
chr1	93497370	93497944	60000	NM_023046	Intergenic	Asb1
chr1	93561205	93561664	123778	NM_023046	Intergenic	Asb1
chr1	93658329	93658646	-39550	NM_007855	Intergenic	Twist2
chr1	93662180	93662900	-35498	NM_007855	Intergenic	Twist2
chr1	93727759	93728004	29844	NM_007855	intron	Twist2
chr1	93808701	93809309	110967	NM_007855	Intergenic	Twist2
chr1	93816379	93817174	118739	NM_007855	Intergenic	Twist2
chr1	93858783	93859129	160918	NM_007855	intron	Twist2
chr1	93859608	93859966	161749	NM_007855	intron	Twist2
chr1	93860097	93860422	162222	NM_007855	intron	Twist2
chr1	93884611	93885359	186947	NM_007855	intron	Twist2
chr1	93890442	93890783	186305	NM_207225	intron	Hdac4
chr1	93900613	93900997	176113	NM_207225	intron	Hdac4
chr1	93960906	93961296	115817	NM_207225	intron	Hdac4
chr1	93983179	93983433	93612	NM_207225	intron	Hdac4
chr1	94001912	94002260	74832	NM_207225	intron	Hdac4
chr1	94004070	94004401	72682	NM_207225	intron	Hdac4
chr1	94010081	94010903	66426	NM_207225	intron	Hdac4
chr1	94015805	94016457	60787	NM_207225	intron	Hdac4
chr1	94039126	94039574	37568	NM_207225	intron	Hdac4
chr1	94040432	94040861	36271	NM_207225	intron	Hdac4
chr1	94045782	94046087	30983	NM_207225	intron	Hdac4
chr1	94076330	94076688	409	NM_207225	intron	Hdac4
chr1	94077199	94077738	-551	NM_207225	promoter-TSS	Hdac4
chr1	94079869	94080316	-3175	NM_207225	Intergenic	Hdac4
chr1	94120800	94121474	-44219	NM_207225	Intergenic	Hdac4
chr1	94156271	94156729	-79582	NM_207225	Intergenic	Hdac4
chr1	94212749	94213153	-136033	NM_207225	Intergenic	Hdac4
chr1	94213582	94214214	-136980	NM_207225	Intergenic	Hdac4
chr1	94221145	94221564	139764	NR_105865	Intergenic	Mir6900
chr1	94221814	94222059	139182	NR_105865	Intergenic	Mir6900
chr1	94226322	94226687	134614	NR_105865	Intergenic	Mir6900
chr1	94237094	94237352	123896	NR_105865	Intergenic	Mir6900
chr1	94244388	94245612	116119	NR_105865	Intergenic	Mir6900
chr1	94256969	94257393	103938	NR_105865	Intergenic	Mir6900
chr1	94328646	94329522	32035	NR_105865	Intergenic	Mir6900
chr1	94334003	94334853	26691	NR_105865	Intergenic	Mir6900
chr1	94369966	94370471	116	NM_024197	intron	Ndufa10
chr1	94537973	94538581	248	NR_028108	non-coding	Myeov2
chr1	94604025	94604361	-58775	NM_153114	Intergenic	Otos
chr1	94634085	94634923	-89086	NM_153114	Intergenic	Otos
chr1	94671319	94671805	-56701	NM_016696	Intergenic	Gpc1
chr1	94727643	94727983	-450	NM_016696	promoter-TSS	Gpc1
chr1	94728146	94728507	64	NM_016696	promoter-TSS	Gpc1
chr1	94729087	94729680	1121	NM_016696	intron	Gpc1
chr1	94785433	94786261	13636	NM_172850	intron	Ankmy1
chr1	94791596	94791855	7757	NM_172850	intron	Ankmy1
chr1	94803157	94804218	122	NM_175118	exon	Dusp28
chr1	94806878	94807852	-37	NM_181405	promoter-TSS	Rnpepl1
chr1	94815616	94815886	8349	NM_181405	intron	Rnpepl1
chr1	94816070	94816332	8799	NM_181405	exon	Rnpepl1
chr1	94830678	94831672	190	NM_011796	non-coding	Capn10
chr1	94858755	94859395	-10621	NM_001104529	Intergenic	Gpr35
chr1	94875301	94875938	140	NM_022320	5'UTR	Gpr35
chr1	94997246	94997900	878	NM_001294149	intron	Kif1a
chr1	95011517	95012120	-13368	NM_001110315	Intergenic	Kif1a
chr1	95072981	95073303	8142	NM_001310428	intron	Crocc2
chr1	95124251	95124568	-8064	NM_172463	intron	Sned1
chr1	95169230	95169475	-1773	NR_105866	intron	Mir6901
chr1	95171888	95172636	1136	NR_105866	intron	Mir6901
chr1	95202290	95202780	-79	NM_001310756	promoter-TSS	Mterf4
chr1	95239276	95239904	-225	NM_080850	promoter-TSS	Pask
chr1	95240145	95240524	113	NM_023200	promoter-TSS	Ppp1r7
chr1	95297893	95298193	27570	NM_001271884	exon	Ano7
chr1	95341441	95341745	685	NM_001301364	intron	Hdlbp
chr1	95341869	95342216	235	NM_001301364	intron	Hdlbp
chr1	95374343	95375262	691	NM_133808	promoter-TSS	Hdlbp
chr1	95375563	95376308	298	NM_001159719	promoter-TSS	2019-09-02
chr1	95377012	95377434	1585	NM_001159719	intron	2019-09-02
chr1	95408194	95408807	-180	NM_145519	promoter-TSS	Farp2
chr1	95473700	95474010	58449	NM_021537	intron	Stk25
chr1	95504107	95504618	27941	NM_021537	intron	Stk25
chr1	95531939	95532467	101	NM_021537	5'UTR	Stk25
chr1	95532648	95532914	-477	NM_021537	promoter-TSS	Stk25
chr1	95564613	95565075	-17308	NM_016778	Intergenic	Bok
chr1	95582359	95582766	411	NM_016778	intron	Bok
chr1	95582967	95583720	1192	NM_016778	intron	Bok
chr1	95601940	95602720	20178	NM_016778	intron	Bok
chr1	95617952	95618197	10428	NM_001310761	intron	Thap4
chr1	95628197	95628883	-37	NM_001310761	promoter-TSS	Thap4
chr1	95643898	95644187	7372	NM_025920	intron	Thap4
chr1	95650532	95651170	564	NM_025920	promoter-TSS	Thap4
chr1	95651309	95652227	158	NM_174874	promoter-TSS	Atg4b
chr1	95697909	95698936	88	NM_023136	promoter-TSS	Dtymk
chr1	95700026	95701165	54	NM_025454	promoter-TSS	Ing5
chr1	95706714	95706954	6292	NM_025454	intron	Ing5
chr1	95721471	95723523	680	NM_001310767	intron	D2hgdh
chr1	95931337	95932145	14671	NM_001310769	Intergenic	Neu4
chr1	95977843	95978462	-29023	NM_008798	Intergenic	Pdcd1
chr1	96178123	96178405	-229134	NM_008798	Intergenic	Pdcd1
chr1	96195000	96195363	-246052	NM_008798	Intergenic	Pdcd1
chr1	96239108	96239505	-290177	NM_008798	Intergenic	Pdcd1
chr1	96792167	96792422	98276	NR_040473	Intergenic	4930440C22Rik
chr1	96889786	96890359	196054	NR_040473	Intergenic	4930440C22Rik
chr1	96926927	96927599	233244	NR_040473	Intergenic	4930440C22Rik
chr1	96930092	96931415	236735	NR_040473	Intergenic	4930440C22Rik
chr1	97157152	97157681	-52788	NM_026321	Intergenic	Fam174a
chr1	97498741	97499017	65292	NM_009183	intron	St8sia4
chr1	97563819	97564354	84	NM_009183	promoter-TSS	St8sia4
chr1	97650986	97651437	-38117	NR_040479	Intergenic	4930598F16Rik
chr1	98379421	98379882	179498	NR_040478	Intergenic	4930533P14Rik
chr1	98490244	98490496	68780	NR_040478	Intergenic	4930533P14Rik
chr1	98521905	98522317	37039	NR_040478	intron	4930533P14Rik
chr1	98763791	98764039	-3788	NR_131964	intron	Panct2
chr1	98768545	98769099	-74	NM_172658	promoter-TSS	Slco4c1
chr1	98770989	98771919	-2706	NM_172658	intron	Slco4c1
chr1	98772634	98773140	-4139	NM_172658	intron	Slco4c1
chr1	99526645	99526964	31790	NM_133825	Intergenic	D1Ertd622e
chr1	99530714	99531613	27431	NM_133825	Intergenic	D1Ertd622e
chr1	99557574	99558348	634	NM_133825	intron	D1Ertd622e
chr1	99665823	99667457	29	NM_173760	promoter-TSS	Ppip5k2
chr1	99690763	99691076	24171	NM_026250	TTS	Gin1
chr1	99825815	99826064	118430	NR_037993	intron	B230216N24Rik
chr1	99873469	99873710	70780	NR_037993	5'UTR	B230216N24Rik
chr1	99933205	99933468	11033	NR_037993	intron	B230216N24Rik
chr1	99969427	99970316	22337	NM_013626	intron	Pam
chr1	99982933	99983519	8983	NM_013626	intron	Pam
chr1	99988920	99989311	3093	NM_013626	intron	Pam
chr1	100563990	100564551	246570	NM_027584	Intergenic	Slco6d1
chr1	100822783	100823036	505209	NM_027584	Intergenic	Slco6d1
chr1	101292407	101292930	-376673	NM_172851	Intergenic	Cntnap5b
chr1	101350740	101351258	-318343	NM_172851	Intergenic	Cntnap5b
chr1	101508021	101508356	-161153	NM_172851	Intergenic	Cntnap5b
chr1	101668828	101669119	-368	NM_172851	promoter-TSS	Cntnap5b
chr1	101867216	101867856	198194	NM_172851	intron	Cntnap5b
chr1	102774573	102775270	-277423	NR_037989	Intergenic	Gm20268
chr1	103652895	103654527	601366	NR_037989	Intergenic	Gm20268
chr1	104200125	104200425	1147930	NR_037989	Intergenic	Gm20268
chr1	104707838	104708343	1655746	NR_037989	Intergenic	Gm20268
chr1	104952885	104953130	-1712388	NM_011800	Intergenic	Cdh20
chr1	104990348	104991130	-1674657	NM_011800	Intergenic	Cdh20
chr1	105368030	105368461	-1297150	NM_011800	Intergenic	Cdh20
chr1	105636940	105637247	-1028302	NM_011800	Intergenic	Cdh20
chr1	105697096	105697675	-968010	NM_011800	Intergenic	Cdh20
chr1	106800590	106800830	135314	NM_011800	intron	Cdh20
chr1	106883985	106884741	218967	NM_011800	intron	Cdh20
chr1	106908539	106910284	244016	NM_011800	Intergenic	Cdh20
chr1	106967627	106968002	285472	NM_178779	Intergenic	Rnf152
chr1	106991643	106992255	261338	NM_178779	Intergenic	Rnf152
chr1	107076343	107076619	176806	NM_178779	Intergenic	Rnf152
chr1	107322912	107323187	-69763	NM_001160368	Intergenic	Rnf152
chr1	107388201	107388610	-135119	NM_001160368	Intergenic	Rnf152
chr1	107559757	107561315	98	NM_173187	promoter-TSS	2310035C23Rik
chr1	107657242	107657482	-19938	NM_009399	Intergenic	Tnfrsf11a
chr1	107676910	107677193	-248	NM_009399	promoter-TSS	Tnfrsf11a
chr1	107710120	107710456	32988	NM_009399	exon	Tnfrsf11a
chr1	107799960	107800238	-86884	NM_001122676	Intergenic	Zcchc2
chr1	107804818	107805458	-81845	NM_001122676	Intergenic	Zcchc2
chr1	107877760	107878172	-9017	NM_001122676	Intergenic	Zcchc2
chr1	107879392	107880166	-7204	NM_001122676	Intergenic	Zcchc2
chr1	107886225	107887509	-116	NM_001122676	promoter-TSS	Zcchc2
chr1	107887614	107888280	964	NM_001122675	exon	Zcchc2
chr1	107889880	107890826	3370	NM_001122675	intron	Zcchc2
chr1	107895093	107895600	8364	NM_001122675	intron	Zcchc2
chr1	107949921	107950481	63218	NM_001122675	Intergenic	Zcchc2
chr1	107954704	107955337	68038	NM_001122675	Intergenic	Zcchc2
chr1	108005535	108006268	62199	NR_040630	Intergenic	Gm20753
chr1	108060677	108061151	7187	NR_040630	intron	Gm20753
chr1	108067961	108068601	-165	NM_133821	promoter-TSS	Phlpp1
chr1	108068853	108070198	1080	NM_133821	exon	Phlpp1
chr1	108073300	108073936	5172	NM_133821	intron	Phlpp1
chr1	108080701	108081463	12636	NM_133821	intron	Phlpp1
chr1	108096249	108096751	28054	NM_133821	intron	Phlpp1
chr1	108108640	108109240	40494	NM_133821	intron	Phlpp1
chr1	108118300	108118925	50167	NM_133821	intron	Phlpp1
chr1	108173991	108174553	105826	NM_133821	intron	Phlpp1
chr1	108175041	108175735	106942	NM_133821	intron	Phlpp1
chr1	108291801	108292317	151149	NR_106164	Intergenic	Mir3473f
chr1	108411000	108411240	32088	NR_106164	Intergenic	Mir3473f
chr1	108460706	108461441	-17866	NR_106164	intron	Mir3473f
chr1	108610324	108610896	257	NM_009741	5'UTR	Bcl2
chr1	108611081	108611321	-334	NM_177410	promoter-TSS	Bcl2
chr1	108655518	108656731	194	NM_027534	exon	Kdsr
chr1	108692858	108693228	259	NM_009190	5'UTR	Vps4b
chr1	108713117	108714024	-20269	NM_009190	Intergenic	Vps4b
chr1	108845814	108846234	10490	NM_001199213	intron	Serpinb12
chr1	108995072	108995496	-15227	NM_201376	Intergenic	Serpinb3d
chr1	109486531	109486934	150	NM_001159748	5'UTR	Serpinb8
chr1	109593448	109593954	107118	NM_001159748	Intergenic	Serpinb8
chr1	109857566	109857974	43934	NR_102307	Intergenic	D830032E09Rik
chr1	109874128	109874500	60478	NR_102307	Intergenic	D830032E09Rik
chr1	109874876	109875252	61228	NR_102307	Intergenic	D830032E09Rik
chr1	110155985	110156287	342300	NR_102307	Intergenic	D830032E09Rik
chr1	110443070	110443524	629461	NR_102307	Intergenic	D830032E09Rik
chr1	110445220	110445813	631681	NR_102307	Intergenic	D830032E09Rik
chr1	110459549	110459928	645903	NR_102307	Intergenic	D830032E09Rik
chr1	111878616	111878861	-1575	NM_172853	Intergenic	Cdh7
chr1	111879056	111879390	-1091	NM_172853	Intergenic	Cdh7
chr1	112555748	112556169	317990	NM_001081386	Intergenic	Cdh19
chr1	112670763	112672017	202559	NM_001081386	Intergenic	Cdh19
chr1	112687210	112687557	186565	NM_001081386	Intergenic	Cdh19
chr1	112800703	112801529	72833	NM_001081386	intron	Cdh19
chr1	113507599	113507859	253766	NM_001081316	Intergenic	Dsel
chr1	113760612	113761543	417	NM_001081316	5'UTR	Dsel
chr1	113939604	113939921	-178268	NM_001081316	Intergenic	Dsel
chr1	114348995	114349618	-587812	NM_001081316	Intergenic	Dsel
chr1	114383140	114383385	-621768	NM_001081316	Intergenic	Dsel
chr1	115854472	115856909	-1726023	NM_001077425	Intergenic	Cntnap5a
chr1	115860245	115861714	-1720734	NM_001077425	Intergenic	Cntnap5a
chr1	116538191	116538864	-1043186	NM_001077425	Intergenic	Cntnap5a
chr1	116745852	116746670	-835453	NM_001077425	Intergenic	Cntnap5a
chr1	117228586	117229006	-352918	NM_001077425	Intergenic	Cntnap5a
chr1	117740257	117740573	158701	NM_001077425	intron	Cntnap5a
chr1	117926256	117926677	344753	NM_001077425	intron	Cntnap5a
chr1	118263386	118263808	681883	NM_001077425	intron	Cntnap5a
chr1	119187199	119187643	1020288	NM_011650	Intergenic	Tsn
chr1	119210136	119210821	997230	NM_011650	Intergenic	Tsn
chr1	119354330	119355438	852825	NM_011650	Intergenic	Tsn
chr1	119355546	119356256	851808	NM_011650	Intergenic	Tsn
chr1	119546728	119547279	660705	NM_011650	Intergenic	Tsn
chr1	119712885	119713221	494656	NM_011650	Intergenic	Tsn
chr1	119900499	119900941	306989	NM_011650	Intergenic	Tsn
chr1	120125282	120125562	82287	NM_011650	Intergenic	Tsn
chr1	120207156	120208286	-12	NM_011650	promoter-TSS	Tsn
chr1	120232556	120232833	14275	NM_026472	Intergenic	Nifk
chr1	120240270	120241257	22344	NM_026472	Intergenic	Nifk
chr1	120284627	120286730	44	NM_001293301	promoter-TSS	Clasp1
chr1	120298557	120299844	13566	NM_001293301	intron	Clasp1
chr1	120304280	120304826	18918	NM_001293301	intron	Clasp1
chr1	120305800	120306079	20305	NM_001293301	intron	Clasp1
chr1	120308139	120308384	22627	NM_001293301	intron	Clasp1
chr1	120317735	120318205	32335	NM_001293301	intron	Clasp1
chr1	120319290	120319809	33915	NM_001293301	intron	Clasp1
chr1	120325328	120325568	30394	NR_027901	intron	2900060B14Rik
chr1	120353541	120353829	2157	NR_027901	intron	2900060B14Rik
chr1	120355438	120356614	-184	NR_027901	promoter-TSS	2900060B14Rik
chr1	120377861	120378334	-22256	NR_027901	intron	2900060B14Rik
chr1	120383281	120383649	-27623	NR_027901	intron	2900060B14Rik
chr1	120383870	120384398	-28292	NR_027901	intron	2900060B14Rik
chr1	120457302	120457701	-67020	NM_023755	intron	Tfcp2l1
chr1	120521615	120523807	-1811	NM_023755	Intergenic	Tfcp2l1
chr1	120523909	120526369	617	NM_023755	intron	Tfcp2l1
chr1	120526834	120527282	2536	NM_023755	intron	Tfcp2l1
chr1	120530170	120530799	5963	NM_023755	intron	Tfcp2l1
chr1	120538487	120540340	14892	NM_023755	intron	Tfcp2l1
chr1	120542047	120542924	17964	NM_023755	intron	Tfcp2l1
chr1	120544410	120545439	20403	NM_023755	intron	Tfcp2l1
chr1	120546431	120547708	22548	NM_023755	intron	Tfcp2l1
chr1	120559470	120560284	35355	NM_023755	intron	Tfcp2l1
chr1	120570804	120571154	46457	NM_023755	intron	Tfcp2l1
chr1	120578805	120579701	54731	NM_023755	3'UTR	Tfcp2l1
chr1	120584251	120584746	59977	NM_023755	Intergenic	Tfcp2l1
chr1	120586436	120586948	62170	NM_023755	Intergenic	Tfcp2l1
chr1	120626335	120627097	102194	NM_023755	Intergenic	Tfcp2l1
chr1	120630256	120630666	105939	NM_023755	Intergenic	Tfcp2l1
chr1	120653276	120654170	129201	NM_023755	Intergenic	Tfcp2l1
chr1	120656375	120656640	131986	NM_023755	Intergenic	Tfcp2l1
chr1	120672787	120673808	148776	NM_023755	Intergenic	Tfcp2l1
chr1	120736356	120736900	-114169	NR_105764	intron	Mir6346
chr1	120764957	120765438	-85599	NR_105764	intron	Mir6346
chr1	120770089	120770593	-80456	NR_105764	intron	Mir6346
chr1	120772025	120772436	-78566	NR_105764	intron	Mir6346
chr1	120807524	120808161	-42954	NR_105764	intron	Mir6346
chr1	120812451	120812720	-38211	NR_105764	intron	Mir6346
chr1	120816819	120817126	-33824	NR_105764	intron	Mir6346
chr1	120843671	120844244	-6839	NR_105764	intron	Mir6346
chr1	120880200	120880745	29676	NR_105764	intron	Mir6346
chr1	120882007	120882355	31384	NR_105764	intron	Mir6346
chr1	120900328	120900979	49542	NM_001081125	intron	Gli2
chr1	120901369	120901610	48706	NM_001081125	intron	Gli2
chr1	120902988	120904206	46599	NM_001081125	intron	Gli2
chr1	120907613	120907901	42439	NM_001081125	intron	Gli2
chr1	120920564	120920878	29475	NM_001081125	intron	Gli2
[truncated: 59,506 more rows]
