# Supplementary material for: The histone deacetylase complex MiDAC regulates a neurodevelopmental gene expression program to control neurite outgrowth
Source: eLife. 2020 Apr 16;9:e57519. doi: 10.7554/eLife.57519 (PMC7192582; doi:10.7554/eLife.57519)
Supplement: Supplementary file 4. [file elife-57519-supp4.xlsx]

## Sheet: Dnttip1 bound up
Gene	log2FC_Dnttip1KO_vs_WT	AveExpr_Dnttip1KO_vs_WT	T.Value_Dnttip1KO_vs_WT	P.Value_Dnttip1KO_vs_WT	HomoSapiens.Gene	Intergenic_NearestPeakDistance	Intron_NearestPeakDistance	Exon_NearestPeakDistance	5'UTR_NearestPeakDistance	Promoter-TSS_NearestPeakDistance	3'UTR_NearestPeakDistance	Non-coding_NearestPeakDistance	TTS_NearestPeakDistance	GO_NEURON_DIFFERENTIATION_844
Cd180	2.58892	-0.117812	8.99386	8.43042e-05	CD180	15579	5269	NA	NA	-735	NA	NA	NA	FALSE
Nod2	2.20409	2.37756	8.17279	0.000147054	NOD2	NA	21393	NA	NA	-116	NA	NA	NA	FALSE
Adh7	2.12552	-0.622763	5.69382	0.00110579	ADH7	NA	-1939	NA	NA	NA	NA	NA	NA	FALSE
2410004A20Rik	2.10586	5.95039	12.417	1.23819e-05	NA	NA	NA	NA	NA	NA	NA	NA	NA	FALSE
Casq2	2.06582	0.784956	8.84097	9.31869e-05	CASQ2	-2032	17659	NA	NA	NA	NA	NA	NA	FALSE
Spry4	1.92419	2.24301	1.19145	0.276797	SPRY4	-24821	NA	NA	NA	-840	NA	NA	NA	FALSE
Dnahc17	1.92164	1.95211	7.27421	0.000286269	NA	NA	NA	NA	NA	NA	NA	NA	NA	FALSE
Igfbp7	1.84777	1.01698	6.94622	0.000371307	IGFBP7	NA	25611	476	NA	NA	NA	NA	NA	FALSE
Inf2	1.80608	2.92798	5.12122	0.00193303	INF2	-28387	NA	NA	NA	NA	NA	NA	NA	FALSE
Dnmt3l	1.76831	5.38868	4.04521	0.00622608	DNMT3L	NA	NA	NA	NA	NA	NA	NA	NA	FALSE
Gm757	1.71539	0.199244	4.65029	0.00316028	RNF224	NA	NA	NA	NA	NA	NA	NA	NA	FALSE
Car5a	1.68902	1.11798	6.7867	0.000422891	CA5A	NA	868	NA	NA	NA	NA	NA	NA	FALSE
Gm1082	1.67208	-0.521846	3.84448	0.00789168	NA	NA	NA	NA	NA	NA	NA	NA	NA	FALSE
Gm216	1.65494	0.663276	4.94753	0.00230911	NA	NA	NA	NA	NA	NA	NA	NA	NA	FALSE
Itpkb	1.64503	3.38918	4.61095	0.00329735	ITPKB	-10398	NA	NA	NA	NA	NA	NA	NA	FALSE
St8sia1	1.64102	3.02357	4.62287	0.00325514	ST8SIA1	-44649	2087	NA	NA	-279	NA	NA	NA	FALSE
Gm694	1.64023	2.30408	3.83788	0.00795434	C1orf64	-3430	NA	2986	NA	NA	NA	NA	NA	FALSE
Gm13844	1.63176	-0.266441	4.18221	0.00531461	NA	NA	NA	NA	NA	NA	NA	NA	NA	FALSE
Icosl	1.62371	1.63001	7.14084	0.000317834	LOC102723996	27507	284	NA	NA	NA	NA	NA	NA	FALSE
Slc41a3	1.61444	2.43038	10.1586	4.11449e-05	SLC41A3	NA	1784	16057	NA	-14	NA	NA	NA	FALSE
Dkkl1	1.612	1.8224	3.74929	0.00884981	DKKL1	NA	NA	NA	NA	NA	NA	NA	NA	FALSE
Gm13029	1.58979	-0.0552466	4.52583	0.00361739	NA	NA	NA	NA	NA	NA	NA	NA	NA	FALSE
Anxa2	1.57214	2.22652	10.3194	3.74852e-05	ANXA2	NA	NA	NA	NA	61	NA	NA	NA	FALSE
Gm13068	1.53602	2.48639	4.87881	0.00248016	NA	NA	NA	NA	NA	NA	NA	NA	NA	FALSE
Tmem179	1.51083	0.388073	5.86955	0.000939101	TMEM179	-5946	NA	NA	NA	NA	NA	NA	NA	FALSE
2310015A10Rik	1.48922	2.03031	6.31566	0.00063005	NA	-17814	229	NA	NA	NA	NA	NA	NA	FALSE
Myh7b	1.46145	3.84652	6.14637	0.000731197	MYH7B	-6210	2107	NA	NA	61	NA	NA	NA	FALSE
Crabp2	1.44949	1.1589	5.50253	0.00132658	CRABP2	NA	1005	NA	NA	NA	NA	NA	NA	FALSE
Fam19a4	1.44113	2.54601	12.441	1.22387e-05	FAM19A4	-42128	11973	NA	NA	-205	NA	NA	NA	FALSE
Scnn1a	1.43135	1.31164	7.02259	0.000349184	SCNN1A	NA	NA	NA	NA	43	NA	NA	NA	FALSE
Irak2	1.42943	4.43814	8.01362	0.000164706	IRAK2	NA	13357	NA	NA	NA	NA	NA	NA	FALSE
Id1	1.4101	0.236099	6.35463	0.00060908	ID1	-1021	NA	NA	NA	NA	NA	NA	1312	TRUE
Adssl1	1.40366	2.30035	10.0087	4.49345e-05	ADSSL1	-1860	826	-11514	NA	-39	NA	NA	NA	FALSE
Crb2	1.38727	2.39582	5.30984	0.00160085	CRB2	-4427	4114	NA	NA	-6	NA	NA	NA	FALSE
Zbtb16	1.38235	0.643829	4.22595	0.00505566	ZBTB16	-3883	57670	NA	NA	69	NA	NA	NA	FALSE
Akr1b8	1.373	1.98919	5.09959	0.00197586	AKR1B10	-9700	NA	NA	NA	NA	NA	NA	NA	FALSE
Rnf213	1.36268	7.1149	5.68531	0.00111468	RNF213	NA	NA	NA	NA	NA	NA	NA	NA	FALSE
Gm15351	1.35691	1.18395	5.58754	0.00122282	NA	NA	NA	NA	NA	NA	NA	NA	NA	FALSE
E330020D12Rik	1.33817	5.31852	9.50998	6.07626e-05	NA	12395	NA	NA	NA	NA	NA	NA	NA	FALSE
Il12rb1	1.33266	-0.189484	4.41783	0.00407467	IL12RB1	-3715	NA	2643	NA	NA	NA	NA	13356	FALSE
Nes	1.32127	5.62251	5.48423	0.0013502	NA	-10184	3551	264	NA	NA	NA	NA	NA	FALSE
9130017N09Rik	1.32126	3.18884	6.68921	0.00045843	NA	NA	NA	NA	NA	NA	NA	NA	NA	FALSE
Fgg	1.31645	0.0380935	4.48072	0.00380101	FGG	-11066	NA	NA	NA	-183	NA	NA	NA	FALSE
Cpe	1.31216	6.20977	6.26186	0.000660359	CPE	NA	39559	233	NA	NA	NA	NA	NA	FALSE
Pvrl1	1.30594	3.86269	8.67664	0.000103956	PVRL1	NA	NA	NA	NA	NA	NA	NA	NA	TRUE
Atp12a	1.29543	1.09095	6.82363	0.000410258	ATP12A	NA	NA	NA	NA	-237	NA	NA	NA	FALSE
Eps8	1.27858	5.48561	11.8786	1.61693e-05	EPS8	-7730	-6882	NA	NA	-22	NA	NA	NA	FALSE
Slco4a1	1.27717	2.81906	10.433	3.51244e-05	SLCO4A1	-2966	NA	11431	NA	-177	NA	NA	NA	FALSE
Gpnmb	1.26864	5.78413	4.96743	0.00226209	GPNMB	-8262	449	NA	NA	NA	NA	NA	NA	FALSE
Vill	1.26107	1.66093	7.55406	0.00023101	VILL	NA	2876	10847	NA	-54	NA	NA	NA	FALSE
Gc	1.2509	1.65038	8.75262	9.88083e-05	GC	102637	244059	NA	NA	NA	NA	NA	NA	FALSE
Fam13c	1.23679	2.19904	5.81116	0.000991093	FAM13C	-7229	NA	NA	NA	-32	NA	NA	NA	FALSE
Ecscr	1.23485	0.12555	5.41434	0.0014449	ECSCR	NA	3543	NA	NA	NA	NA	NA	NA	FALSE
Slc44a3	1.23374	0.359132	4.24386	0.00495373	SLC44A3	-7717	1826	NA	NA	-141	NA	NA	NA	FALSE
Slc6a7	1.23103	4.00668	6.15849	0.000723369	SLC6A7	23141	900	NA	NA	NA	NA	NA	NA	FALSE
Lrrk1	1.22577	-0.22678	5.35577	0.00153008	LRRK1	NA	337	NA	NA	NA	NA	NA	NA	FALSE
Spsb4	1.22197	1.18595	3.91966	0.00721599	SPSB4	-38259	4941	NA	NA	-357	NA	NA	NA	FALSE
Oplah	1.20944	4.15091	5.78866	0.001012	OPLAH	NA	NA	NA	NA	-146	NA	NA	NA	FALSE
Ggt1	1.19929	2.82701	4.0398	0.00626545	GGT1	-2802	NA	NA	NA	NA	NA	NA	NA	FALSE
Fgf10	1.19819	3.68425	4.0414	0.00625374	FGF10	-8681	2032	NA	NA	-307	NA	NA	NA	FALSE
Rab19	1.19686	0.0344504	4.00373	0.00653539	RAB19	12192	18939	NA	NA	-39	NA	NA	15837	FALSE
AA986860	1.17673	2.73298	5.53764	0.00128256	C1orf116	NA	5812	NA	NA	2	NA	NA	NA	FALSE
Palm3	1.17556	4.90853	16.3131	2.35841e-06	PALM3	NA	116	NA	NA	NA	NA	NA	NA	FALSE
Il34	1.17302	2.30017	4.21756	0.00510425	IL34	NA	NA	-11726	NA	NA	NA	NA	NA	FALSE
Mdk	1.17237	4.98614	11.9056	1.59498e-05	MDK	NA	NA	NA	NA	43	NA	NA	NA	FALSE
Espn	1.16896	1.38858	3.75359	0.00880387	ESPN	-1713	1473	-2333	NA	-70	NA	NA	NA	FALSE
Rgs3	1.16419	4.2544	4.36801	0.00430715	RGS3	71382	6933	NA	NA	-330	-14380	NA	NA	FALSE
Ahnak	1.16143	8.84088	5.53288	0.00128842	AHNAK	-4632	761	NA	NA	-525	NA	NA	NA	FALSE
Pacsin1	1.15416	0.283706	4.23737	0.00499041	PACSIN1	-1931	18930	17572	NA	NA	NA	NA	NA	TRUE
Macrod1	1.15339	0.705909	3.79756	0.00834878	MACROD1	NA	1129	NA	NA	-7	NA	NA	NA	FALSE
1700066B19Rik	1.14984	0.652432	5.88554	0.000925407	NA	NA	NA	NA	NA	NA	3450	NA	NA	FALSE
Fgl2	1.14793	0.290331	4.00371	0.00653554	FGL2	NA	11383	NA	NA	NA	NA	NA	NA	FALSE
Eps8l2	1.14237	5.0435	4.43925	0.00397906	EPS8L2	NA	1366	NA	NA	NA	NA	NA	NA	FALSE
Elmo3	1.14075	3.97786	11.8933	1.60494e-05	ELMO3	NA	NA	NA	NA	0	NA	NA	NA	FALSE
Nfatc2	1.13903	-0.386248	4.6777	0.00306856	NFATC2	-3099	466	NA	NA	-229	NA	NA	NA	FALSE
Pdpn	1.13051	5.15893	11.9966	1.52361e-05	PDPN	-2582	387	NA	NA	NA	NA	NA	NA	FALSE
Nav1	1.12882	4.96031	8.26011	0.000138297	NAV1	-3809	20395	NA	NA	-125	NA	NA	NA	FALSE
Pde1b	1.1273	4.5963	3.78053	0.00852189	PDE1B	NA	4706	NA	NA	16	NA	NA	NA	FALSE
Fam129c	1.11652	1.42274	4.17337	0.00536865	FAM129C	NA	NA	-1523	NA	NA	NA	NA	NA	FALSE
Inpp5d	1.10474	5.69127	4.09104	0.00590309	INPP5D	NA	38132	NA	NA	NA	NA	NA	NA	FALSE
1700086P04Rik	1.10243	-0.312422	5.03603	0.00210807	NA	NA	NA	NA	NA	NA	NA	NA	NA	FALSE
Srrm4	1.10168	0.639048	3.75393	0.00880016	SRRM4	-152549	NA	NA	NA	-13	NA	NA	NA	FALSE
Kndc1	1.09648	2.67305	4.47775	0.00381347	KNDC1	NA	11104	NA	NA	NA	NA	NA	NA	TRUE
1700012A16Rik	1.09485	0.730508	4.25773	0.00487638	NA	NA	NA	NA	NA	NA	NA	NA	NA	FALSE
Zc3h6	1.09418	0.989427	5.81697	0.00098578	ZC3H6	NA	NA	NA	286	NA	NA	NA	NA	FALSE
Lrp1	1.08494	5.39398	8.8306	9.38274e-05	LRP1	NA	964	30531	NA	-116	NA	NA	NA	FALSE
Chd5	1.08473	2.24875	6.53527	0.000521725	CHD5	NA	614	NA	NA	NA	NA	-5388	NA	TRUE
Zbp1	1.08446	1.29782	5.88203	0.000928389	ZBP1	NA	-10966	NA	NA	NA	-6178	NA	NA	FALSE
Pde4c	1.08398	0.933715	4.1114	0.00576563	PDE4C	NA	6302	NA	NA	NA	NA	NA	NA	FALSE
Sema4a	1.07755	1.68619	4.877	0.00248485	SEMA4A	-12043	NA	NA	NA	NA	NA	NA	NA	TRUE
Magi2	1.07366	1.09692	4.95094	0.00230098	MAGI2	NA	-119917	NA	NA	NA	NA	NA	NA	FALSE
Tcl1	1.07087	6.18127	8.81339	9.49014e-05	TCL1A	-2124	1453	NA	NA	-369	NA	NA	NA	FALSE
Cyp1a1	1.06032	5.60524	11.5747	1.88906e-05	CYP1A1	NA	NA	NA	NA	-891	NA	NA	NA	FALSE
Arhgap8	1.0603	4.14004	7.2478	0.000292223	ARHGAP8	NA	NA	NA	NA	-102	NA	-5059	NA	FALSE
Bin2	1.05968	3.48268	5.04498	0.00208888	BIN2	NA	NA	NA	NA	NA	NA	NA	-4446	FALSE
Nckap1l	1.05882	4.23889	4.06991	0.00604963	NCKAP1L	NA	NA	NA	NA	NA	NA	NA	NA	FALSE
Atp2a3	1.0582	5.55	3.96006	0.00687961	ATP2A3	-6211	517	NA	NA	-234	-35643	NA	NA	FALSE
Unc13d	1.0526	3.82822	5.3755	0.00150077	UNC13D	NA	12939	19684	NA	-299	NA	NA	NA	FALSE
Selplg	1.0485	-0.0498865	4.11026	0.00577322	SELPLG	NA	1992	NA	NA	NA	NA	NA	-10966	FALSE
Dusp3	1.0439	2.33192	7.24509	0.000292843	DUSP3	NA	1528	NA	NA	37	NA	NA	NA	FALSE
1600029D21Rik	1.03855	4.44199	4.86075	0.00252746	NA	NA	NA	NA	NA	NA	NA	NA	NA	FALSE
Nkain4	1.03235	2.06678	4.99996	0.00218754	NKAIN4	NA	978	NA	NA	NA	NA	NA	NA	FALSE
Phyhip	1.02408	0.6853	4.37426	0.00427718	PHYHIP	NA	9035	NA	171	NA	NA	NA	NA	FALSE
Hydin	1.01977	1.93587	4.75571	0.00282346	HYDIN	-22181	NA	NA	NA	-73	NA	NA	NA	FALSE
Usp43	1.01732	3.70073	5.70645	0.00109275	USP43	NA	-5010	176	NA	NA	NA	NA	NA	FALSE
Arhgef16	1.01637	4.14107	9.06177	8.06741e-05	ARHGEF16	-12341	1841	-35279	NA	-214	-17842	NA	NA	FALSE
Tspo2	1.01188	3.56775	4.68485	0.00304514	TSPO2	NA	NA	NA	NA	NA	NA	NA	3571	FALSE
Sema3b	1.01181	4.28829	3.84484	0.0078883	SEMA3B	-3376	339	NA	215	-24	NA	NA	NA	TRUE
U5	1.0091	2.50329	6.44381	0.00056403	NA	NA	NA	NA	NA	NA	NA	NA	NA	FALSE
Prkar1b	1.00585	0.851099	4.03916	0.00627015	PRKAR1B	NA	48231	NA	NA	NA	NA	NA	NA	FALSE
Sema6b	1.00151	2.12356	6.9607	0.000366992	SEMA6B	-1430	233	NA	NA	NA	NA	NA	NA	FALSE
Crip1	0.99782	4.96111	11.4623	2.00294e-05	CRIP1	-3333	143	NA	NA	NA	NA	NA	NA	FALSE
Acoxl	0.988453	0.995708	5.81284	0.000989555	ACOXL	NA	73073	NA	NA	NA	NA	NA	NA	FALSE
C330011M18Rik	0.976691	-0.0107032	4.14947	0.00551802	NA	NA	NA	NA	NA	NA	NA	NA	NA	FALSE
Gm17580	0.975228	-0.352939	4.27125	0.00480227	NA	NA	NA	NA	NA	NA	NA	NA	NA	FALSE
Tgm1	0.972295	5.3322	10.4979	3.38516e-05	TGM1	NA	3301	NA	NA	NA	NA	NA	NA	FALSE
Plec	0.972223	7.64365	11.4773	1.98729e-05	PLEC	NA	517	14170	NA	70	NA	NA	-1511	FALSE
Arvcf	0.962963	6.00977	11.228	2.26666e-05	ARVCF	NA	281	NA	117	NA	NA	NA	NA	FALSE
F3	0.961378	1.43237	6.10805	0.000756583	F3	12816	683	NA	NA	-6	NA	NA	NA	FALSE
Nos1	0.959143	2.88836	3.78658	0.00845996	NOS1	-1693	31315	29858	NA	NA	NA	NA	NA	FALSE
Lpl	0.950732	4.45262	4.64318	0.00318458	LPL	-15201	508	NA	NA	NA	NA	NA	NA	FALSE
Capg	0.949492	3.90199	7.50549	0.000239657	CAPG	-5504	3343	9166	NA	NA	NA	NA	13379	FALSE
Nlrx1	0.949306	2.73155	8.98152	8.49841e-05	NLRX1	NA	NA	NA	152	NA	NA	NA	NA	FALSE
Apobec2	0.949101	3.43763	4.75713	0.0028192	APOBEC2	-4020	284	9467	NA	NA	NA	NA	NA	FALSE
Nt5e	0.94094	2.96139	5.63551	0.00116834	NT5E	-90455	5119	NA	NA	NA	NA	NA	NA	FALSE
Slc12a4	0.93283	4.96431	5.43677	0.00141371	SLC12A4	-5459	NA	102	NA	-964	NA	NA	NA	FALSE
Gm10060	0.932484	3.77138	3.93894	0.00705325	NA	NA	NA	NA	NA	NA	NA	NA	NA	FALSE
Epha4	0.93101	7.48866	7.96669	0.000170367	EPHA4	-1517	323	NA	NA	-785	NA	NA	NA	TRUE
Rarg	0.929983	3.19782	6.55525	0.000512971	RARG	-5238	2994	NA	NA	-702	NA	NA	NA	FALSE
Fads6	0.923886	4.9952	6.68469	0.000460161	FADS6	NA	4469	NA	NA	-70	NA	NA	NA	FALSE
Lamb3	0.92104	0.964295	4.14856	0.0055238	LAMB3	NA	NA	NA	NA	NA	NA	NA	NA	FALSE
AA386476	0.920649	1.35701	5.38119	0.00149243	NA	NA	NA	NA	NA	NA	NA	NA	NA	FALSE
Spsb1	0.919121	2.2295	6.31009	0.000633112	SPSB1	-4853	9706	NA	NA	-14	NA	NA	NA	FALSE
Aim1l	0.916338	3.86804	6.33333	0.000620441	AIM1L	-6150	975	NA	NA	-742	NA	NA	NA	FALSE
Jakmip1	0.914844	5.61314	5.10229	0.00197047	JAKMIP1	-3131	134	40485	NA	NA	NA	NA	NA	FALSE
Nkx6-2	0.914509	4.98429	7.00274	0.000354787	NKX6-2	-3625	5751	349	NA	NA	NA	NA	2953	TRUE
Amotl2	0.913664	6.47173	4.0378	0.0062801	AMOTL2	-2309	536	2402	NA	NA	NA	NA	NA	FALSE
Tmc4	0.910175	3.31375	8.35309	0.000129624	TMC4	NA	NA	NA	NA	NA	NA	NA	NA	FALSE
B4galnt3	0.908053	6.61098	6.08378	0.000773186	B4GALNT3	-6682	2764	NA	NA	-141	94402	NA	NA	FALSE
Dnahc2	0.907328	1.76535	3.91522	0.00725408	NA	NA	NA	NA	NA	NA	NA	NA	NA	FALSE
Map2k6	0.906901	5.28673	13.061	9.12394e-06	MAP2K6	-1490	444	NA	NA	NA	NA	NA	NA	FALSE
2210011C24Rik	0.906765	1.46989	5.56532	0.00124902	NA	NA	NA	NA	NA	NA	NA	NA	NA	FALSE
Sema6c	0.905929	4.71619	4.82655	0.00261981	SEMA6C	12379	1722	8141	NA	-24	NA	275	NA	TRUE
Ptpn13	0.905811	4.292	6.35574	0.000608499	PTPN13	-5938	3284	NA	NA	2	NA	NA	NA	FALSE
Itpr3	0.902574	6.2301	6.07017	0.000782675	ITPR3	-1016	6727	NA	NA	-141	NA	NA	NA	FALSE
Csrnp1	0.901273	3.44015	6.77889	0.000425618	CSRNP1	-6850	261	NA	NA	NA	NA	NA	NA	FALSE
Tspan17	0.895633	1.75867	6.07099	0.000782099	TSPAN17	29358	381	3216	NA	NA	NA	NA	NA	FALSE
Aldh1l1	0.89305	5.8572	12.8738	9.95613e-06	ALDH1L1	-4113	10487	NA	NA	29	NA	NA	NA	FALSE
Serpinh1	0.892296	5.84972	10.4532	3.47231e-05	SERPINH1	NA	1144	NA	NA	NA	NA	NA	NA	FALSE
Lmna	0.889646	5.58196	4.17742	0.00534379	LMNA	-6583	241	NA	148	NA	NA	NA	NA	FALSE
Zfhx3	0.888269	4.48828	9.24795	7.16083e-05	ZFHX3	-10599	8387	NA	495	-628	NA	NA	NA	FALSE
Ube2l6	0.883764	4.21862	5.37603	0.00149998	UBE2L6	NA	NA	NA	NA	-210	10765	NA	NA	FALSE
AI661453	0.880458	1.59694	4.73863	0.00287519	NA	NA	-7619	NA	NA	95	NA	NA	NA	FALSE
Trim63	0.878831	1.05042	3.80482	0.00827624	TRIM63	NA	11942	1383	NA	NA	NA	NA	NA	FALSE
Gm15651	0.877792	-0.0458291	3.84154	0.00791952	NA	NA	NA	NA	NA	NA	NA	NA	NA	FALSE
Oas2	0.876751	0.841319	3.95393	0.00692951	OAS2	-1624	NA	NA	NA	NA	NA	NA	NA	FALSE
Smagp	0.873613	4.23113	10.7311	2.97019e-05	SMAGP	NA	2584	NA	NA	-57	NA	NA	NA	FALSE
Gpr133	0.872241	0.150775	3.80383	0.00828602	GPR133	NA	NA	NA	NA	NA	NA	NA	NA	FALSE
Tes	0.870582	6.66969	10.7263	2.97802e-05	TES	-32845	336	NA	NA	NA	NA	NA	NA	FALSE
Parp3	0.867885	3.6388	4.00693	0.00651089	PARP3	NA	2024	NA	NA	543	NA	NA	NA	FALSE
Lamb2	0.864733	6.29818	11.1528	2.35963e-05	LAMB2	NA	NA	NA	NA	-950	NA	NA	NA	TRUE
Mlycd	0.862668	2.51027	7.52142	0.000236781	MLYCD	NA	NA	NA	NA	-47	NA	NA	NA	FALSE
Rhou	0.861607	4.61327	3.94164	0.00703079	RHOU	15005	412	NA	NA	NA	NA	NA	NA	FALSE
Pld2	0.857799	2.6938	4.59262	0.00336349	PLD2	NA	NA	NA	NA	10	NA	NA	NA	FALSE
Slc29a3	0.855455	3.84465	9.98802	4.54873e-05	SLC29A3	NA	-16005	NA	NA	20	NA	NA	-9550	FALSE
Has3	0.854923	3.46766	3.88914	0.00748228	HAS3	-5811	1712	NA	NA	56	NA	NA	NA	FALSE
Gm12599	0.853319	-0.209671	3.91474	0.00725822	NA	NA	NA	NA	NA	NA	NA	NA	NA	FALSE
Grtp1	0.851279	5.72992	15.075	3.81897e-06	GRTP1	-1464	5480	NA	NA	-39	NA	NA	NA	FALSE
Hist1h4i	0.849753	6.32639	5.69617	0.00110335	HIST4H4	NA	NA	NA	NA	NA	NA	NA	NA	FALSE
Plod1	0.849738	6.04062	5.69569	0.00110384	PLOD1	-1102	706	NA	NA	NA	NA	NA	NA	FALSE
Anxa5	0.844795	4.10286	6.24882	0.00066795	ANXA5	NA	NA	NA	NA	50	NA	NA	NA	FALSE
Satb2	0.844407	1.88064	4.77723	0.00275976	SATB2	NA	15782	NA	NA	NA	NA	NA	NA	TRUE
Dysf	0.844393	1.61141	5.44205	0.00140649	DYSF	NA	1854	NA	NA	-1	NA	NA	NA	FALSE
Osbpl5	0.842661	1.24549	4.04852	0.00620205	OSBPL5	-6548	NA	NA	NA	NA	NA	NA	NA	FALSE
Ppp1r14a	0.840548	1.48451	3.9958	0.00659645	PPP1R14A	NA	NA	NA	NA	84	NA	NA	4608	FALSE
Agpat3	0.83916	4.48229	7.58158	0.000226269	AGPAT3	-15990	NA	NA	NA	NA	NA	NA	NA	FALSE
Fgd2	0.830688	1.90483	5.87902	0.000930964	FGD2	-3186	717	NA	NA	NA	NA	NA	NA	FALSE
Ppfia4	0.830636	4.59926	4.30555	0.00461985	NA	-11667	5958	NA	NA	NA	NA	NA	NA	FALSE
Rasgef1a	0.824814	3.92201	7.32856	0.000274446	RASGEF1A	-1051	385	NA	NA	NA	NA	NA	NA	FALSE
Gal3st3	0.821948	1.94799	5.27868	0.00165098	GAL3ST3	NA	2492	9166	NA	NA	NA	NA	NA	FALSE
Haus8	0.821658	6.32802	8.48793	0.00011813	HAUS8	NA	11255	NA	NA	112	NA	NA	NA	FALSE
Cacnb3	0.82116	4.45847	10.1973	4.0229e-05	CACNB3	-5916	NA	NA	NA	54	NA	NA	NA	FALSE
Glis2	0.819698	4.89134	8.04788	0.000160711	GLIS2	-8164	970	NA	NA	-177	NA	NA	NA	FALSE
Hmcn2	0.818474	2.23168	4.70557	0.00297835	HMCN2	NA	NA	NA	NA	NA	NA	NA	NA	FALSE
Notch1	0.817027	5.65847	4.24968	0.00492113	NOTCH1	NA	1723	NA	NA	NA	NA	NA	NA	TRUE
Col4a1	0.813254	3.70657	4.59001	0.00337305	COL4A1	NA	-27594	NA	NA	NA	NA	NA	NA	FALSE
Cyba	0.81156	5.17727	6.40598	0.000582658	CYBA	NA	-4039	NA	NA	-165	NA	NA	NA	FALSE
9330133O14Rik	0.80974	1.85295	4.35953	0.00434819	NA	NA	NA	NA	NA	123	NA	NA	866	FALSE
Sh3tc1	0.80764	5.39269	7.92554	0.000175514	SH3TC1	-9330	1753	NA	165	NA	NA	NA	NA	FALSE
Kank1	0.807487	5.54308	8.56762	0.00011189	KANK1	-18393	-38768	NA	NA	-58	NA	NA	-33841	FALSE
4833407H14Rik	0.806952	1.09358	4.08698	0.00593094	NA	NA	NA	NA	NA	NA	NA	NA	NA	FALSE
Etv1	0.802762	2.51567	6.31212	0.000631995	ETV1	-1194	791	NA	115	NA	NA	NA	NA	TRUE
Pmel	0.800706	6.31942	11.4028	2.06635e-05	PMEL	NA	NA	NA	NA	NA	NA	NA	NA	FALSE
Ablim1	0.795637	6.7307	4.07515	0.00601289	ABLIM1	-7954	1878	NA	187	-305	NA	NA	NA	FALSE
Csnk1e	0.795276	5.55948	3.84451	0.00789145	CSNK1E	-6204	2476	NA	NA	-118	NA	NA	NA	TRUE
Abca7	0.794898	5.84141	11.13	2.38857e-05	ABCA7	NA	5907	NA	NA	-369	NA	NA	NA	FALSE
Shc2	0.789786	3.02731	5.12025	0.00193493	SHC2	NA	779	NA	NA	NA	NA	NA	-1028	FALSE
Gm13340	0.789088	6.40615	3.94315	0.00701826	NA	NA	NA	NA	NA	NA	NA	NA	NA	FALSE
Lpar1	0.786182	5.39379	3.81006	0.00822421	LPAR1	-13286	6460	NA	NA	-86	NA	NA	NA	FALSE
Rab11fip5	0.785086	7.049	14.7781	4.31088e-06	RAB11FIP5	-2917	1862	NA	NA	3	NA	NA	NA	FALSE
Rab4a	0.782746	5.3449	10.7657	2.91367e-05	RAB4A	NA	316	NA	NA	NA	NA	NA	NA	FALSE
mmu-mir-2134-4	0.780425	5.83659	3.89854	0.00739911	NA	NA	NA	NA	NA	NA	NA	NA	NA	FALSE
Ier5l	0.777773	3.07429	4.43552	0.00399553	IER5L	4185	NA	371	NA	-827	NA	NA	NA	FALSE
Casz1	0.775061	2.80711	4.45136	0.00392614	CASZ1	-1981	38040	134348	NA	-19	NA	NA	NA	FALSE
Fbxo2	0.774301	0.536683	3.8996	0.00738978	FBXO2	32266	NA	3666	NA	-134	NA	NA	NA	FALSE
Hhex	0.773828	1.78079	5.38392	0.00148845	HHEX	NA	2046	NA	NA	-203	NA	NA	NA	FALSE
Map1lc3b	0.769483	7.69822	5.60208	0.00120601	MAP1LC3B	-5204	1202	NA	NA	-45	NA	NA	NA	FALSE
Anxa4	0.768441	4.28581	3.85005	0.00783935	ANXA4	-22137	253	NA	NA	NA	NA	NA	NA	FALSE
Nfic	0.764067	3.42494	4.23409	0.00500907	NFIC	-3432	2371	NA	NA	NA	NA	NA	NA	FALSE
Kcnn1	0.763641	4.4391	4.36451	0.00432406	KCNN1	-5486	6759	NA	NA	-355	NA	NA	NA	FALSE
H2afy2	0.760621	4.2696	4.46817	0.00385394	H2AFY2	-3810	-55152	NA	NA	-905	NA	NA	NA	FALSE
Dqx1	0.754954	2.04444	4.6779	0.00306788	DQX1	NA	NA	NA	NA	NA	NA	NA	NA	FALSE
Tnfrsf1b	0.75413	3.58827	5.31563	0.00159173	TNFRSF1B	-3038	-24823	NA	NA	-28	NA	NA	NA	FALSE
Unc5b	0.752094	6.1199	13.6085	7.11504e-06	UNC5B	-36802	865	NA	NA	8	NA	NA	NA	TRUE
Fry	0.751946	5.46636	5.35121	0.00153694	FRY	-14211	92240	NA	NA	-251	NA	NA	NA	TRUE
1700023L04Rik	0.750572	1.03872	4.06557	0.00608018	NA	NA	NA	NA	NA	NA	NA	NA	NA	FALSE
Rab25	0.750124	2.43329	6.38616	0.000592699	RAB25	NA	NA	NA	NA	-652	NA	NA	NA	FALSE
Mtus1	0.747337	5.99947	7.35728	0.000268425	MTUS1	NA	2245	349	116	-201	NA	NA	NA	FALSE
Gm1070	0.747065	1.76643	3.71564	0.00921863	NA	NA	NA	NA	NA	NA	NA	NA	NA	FALSE
Ggta1	0.742396	5.60566	11.4745	1.99017e-05	NA	-1657	14810	NA	NA	34	NA	NA	NA	FALSE
Catsperg1	0.740876	2.44005	5.72626	0.00107264	CATSPERG	NA	NA	NA	NA	80	NA	NA	NA	FALSE
Fbxl8	0.740015	0.919739	3.95569	0.00691511	FBXL8	NA	NA	NA	NA	59	NA	NA	NA	FALSE
Hpgd	0.739111	1.38316	3.774	0.00858933	HPGD	-27690	NA	NA	NA	-33	NA	NA	NA	FALSE
Ddhd2	0.737905	6.0943	5.73518	0.00106372	DDHD2	NA	NA	NA	NA	33	NA	NA	NA	FALSE
Gdf11	0.737081	1.59252	4.41414	0.00409141	GDF11	NA	2551	301	NA	NA	NA	NA	NA	FALSE
Gpx2	0.734706	6.71635	8.74445	9.93475e-05	GPX2	NA	NA	NA	NA	NA	NA	NA	NA	FALSE
Rasgrp4	0.734107	3.6849	5.4925	0.00133947	RASGRP4	NA	NA	2739	NA	NA	NA	NA	NA	FALSE
Tspan15	0.733866	4.28983	4.16296	0.00543316	TSPAN15	-1726	13741	NA	NA	NA	NA	NA	NA	FALSE
Nr3c2	0.732594	0.932597	3.7172	0.00920118	NR3C2	NA	218655	NA	NA	-340	NA	NA	NA	FALSE
Palm	0.726046	4.7857	10.4067	3.56542e-05	PALM	NA	1592	NA	155	NA	NA	NA	NA	FALSE
Ttll3	0.725449	1.58599	3.95752	0.00690023	TTLL3	NA	4355	NA	NA	NA	NA	NA	NA	FALSE
Lrrc29	0.724947	1.32419	3.79795	0.0083449	LRRC29	NA	NA	NA	NA	452	NA	NA	NA	FALSE
Myh14	0.723788	3.3736	5.44796	0.00139844	MYH14	-1679	17619	26116	NA	-545	NA	NA	NA	FALSE
Abcg1	0.72258	5.73187	8.94742	8.68954e-05	ABCG1	-9369	15832	NA	NA	-48	NA	NA	NA	FALSE
Wwc1	0.721782	5.14934	10.7187	2.99064e-05	WWC1	-6200	141	-241435	NA	NA	NA	NA	NA	FALSE
Mast3	0.720308	4.84843	4.38384	0.00423173	MAST3	NA	4333	NA	NA	34	NA	NA	NA	FALSE
Mocos	0.719757	3.47467	4.39274	0.00418995	MOCOS	NA	1224	NA	NA	-452	NA	NA	NA	FALSE
2810408A11Rik	0.719065	3.06244	5.82942	0.000974488	NA	NA	NA	NA	NA	-37	NA	NA	NA	FALSE
Irs2	0.717981	3.58575	4.72194	0.00292674	IRS2	NA	NA	NA	NA	-620	NA	NA	NA	FALSE
1300018I17Rik	0.717725	3.71381	5.33383	0.00156343	NA	NA	NA	NA	NA	NA	NA	NA	NA	FALSE
Plekhg5	0.717644	5.76573	7.34649	0.00027067	PLEKHG5	NA	303	NA	NA	95	NA	NA	NA	FALSE
Bhlhe40	0.714041	4.99997	8.51848	0.000115692	BHLHE40	NA	-16074	NA	NA	-515	NA	NA	NA	FALSE
Fbxo31	0.713561	5.35782	6.0974	0.000763821	FBXO31	-4116	5231	NA	NA	-309	NA	NA	NA	FALSE
Lrp2	0.711929	2.86784	5.5945	0.00121474	LRP2	-1957	2950	NA	NA	20	NA	NA	NA	FALSE
Iqsec1	0.708436	3.96331	6.32101	0.000627121	IQSEC1	-3145	-13206	NA	NA	69	NA	NA	NA	FALSE
Pfkfb2	0.707195	5.84554	6.09174	0.000767692	PFKFB2	NA	838	NA	NA	86	NA	NA	NA	FALSE
Sdc4	0.706962	8.12248	4.91099	0.00239835	SDC4	-2188	1412	NA	NA	-262	NA	NA	NA	TRUE
Ablim2	0.70621	3.74926	4.17559	0.00535506	ABLIM2	-2121	389	NA	NA	NA	NA	NA	NA	FALSE
Marveld3	0.705618	1.78458	4.07665	0.00600243	MARVELD3	NA	4536	NA	NA	NA	NA	NA	16793	FALSE
Lama1	0.703257	7.80262	8.83206	9.37365e-05	LAMA1	-3189	13688	NA	NA	-88	NA	NA	NA	FALSE
Fzd10	0.702766	5.85718	4.72825	0.00290713	FZD10	37814	NA	NA	NA	NA	2372	NA	NA	TRUE
Ccdc130	0.702554	3.79995	6.12351	0.000746224	CCDC130	-27579	NA	NA	NA	NA	NA	NA	NA	FALSE
Slfn9	0.702108	2.62309	5.33513	0.00156144	SLFN13	NA	NA	NA	NA	NA	NA	NA	NA	FALSE
Hook2	0.701853	6.50715	8.40345	0.000125187	HOOK2	-4429	227	NA	NA	-998	NA	NA	NA	FALSE
Cacna1a	0.70082	5.38012	4.16993	0.00538987	CACNA1A	-57430	13856	NA	NA	41	NA	NA	NA	TRUE
Gipc2	0.697126	1.85038	4.97184	0.00225181	GIPC2	NA	274	NA	NA	NA	NA	NA	NA	FALSE
Chdh	0.695988	0.679009	3.87743	0.00758726	CHDH	NA	NA	NA	NA	-32	NA	NA	NA	FALSE
Hdhd1a	0.694664	1.59462	3.80209	0.00830338	HDHD1	-243304	NA	NA	NA	NA	NA	NA	NA	FALSE
Bdkrb2	0.694225	2.55265	5.02819	0.00212507	BDKRB2	-1992	918	NA	NA	-271	NA	NA	NA	FALSE
Tmem18	0.693542	5.46085	10.2025	4.01069e-05	NA	70106	209	NA	NA	NA	NA	NA	NA	FALSE
Itgb7	0.693538	4.0532	5.11092	0.00195329	ITGB7	NA	491	NA	NA	NA	-3833	NA	NA	FALSE
Brca2	0.693346	6.99748	10.9086	2.69327e-05	BRCA2	NA	NA	NA	NA	-47	NA	NA	NA	FALSE
Parvb	0.691606	4.26084	6.42205	0.000574659	PARVB	-15595	327	NA	NA	NA	NA	NA	NA	FALSE
Cc2d1a	0.689443	5.30853	7.99671	0.000166721	CC2D1A	NA	NA	NA	NA	224	NA	NA	NA	FALSE
Nup210	0.689415	8.25467	3.66055	0.0098597	NUP210	115620	5160	NA	NA	-98	NA	NA	NA	FALSE
Sh3rf1	0.688474	4.59591	4.06315	0.00609734	SH3RF1	NA	19259	NA	NA	-320	NA	NA	NA	FALSE
Gdap10	0.685491	3.96102	6.33737	0.000618271	NA	NA	17874	22619	NA	NA	NA	602	NA	FALSE
1600016N20Rik	0.684608	2.36172	5.12794	0.00191994	C11orf35	NA	NA	NA	NA	NA	NA	NA	NA	FALSE
Rab3d	0.683773	1.77398	4.83965	0.00258398	RAB3D	NA	-3752	NA	NA	-9	NA	NA	NA	FALSE
Tbc1d2	0.682652	3.96581	5.64047	0.00116286	TBC1D2	NA	6776	168	NA	NA	NA	NA	NA	FALSE
Ildr1	0.682451	6.42603	6.69984	0.000454394	ILDR1	NA	248	15578	NA	NA	NA	NA	NA	FALSE
Agpat2	0.680325	4.88218	4.6976	0.00300383	AGPAT2	-7048	3623	NA	140	NA	NA	NA	NA	FALSE
Isyna1	0.67964	6.67964	7.78736	0.000194151	ISYNA1	NA	-23784	NA	NA	-134	NA	NA	2329	FALSE
Adprh	0.679489	6.39384	8.86529	9.17044e-05	ADPRH	8798	NA	NA	NA	0	NA	NA	NA	FALSE
Susd2	0.677283	6.52726	6.53952	0.00051985	SUSD2	11133	-3972	124	NA	NA	NA	NA	7773	FALSE
Tspan9	0.677235	3.98996	7.38152	0.000263461	TSPAN9	NA	533	NA	NA	NA	NA	NA	NA	FALSE
Atp6v0a4	0.673377	3.08179	6.64043	0.000477487	ATP6V0A4	NA	3524	-33638	NA	NA	NA	NA	NA	FALSE
Hsd17b11	0.672114	2.92752	5.6819	0.00111827	HSD17B11	-3533	18804	NA	NA	-345	NA	NA	NA	FALSE
Ubr4	0.671481	8.13708	6.40602	0.000582638	UBR4	NA	NA	49677	NA	7	-3248	NA	NA	FALSE
Spnb4	0.669001	3.55675	4.85806	0.0025346	NA	NA	NA	NA	NA	NA	NA	NA	NA	FALSE
Junb	0.668866	3.75242	4.87771	0.00248302	JUNB	-1189	NA	338	NA	NA	NA	NA	2324	FALSE
Nek3	0.667441	3.88646	4.61873	0.00326973	NEK3	NA	16406	NA	NA	20	NA	NA	NA	TRUE
Ptpn3	0.666957	5.08638	3.74401	0.0089066	PTPN3	NA	1377	NA	NA	NA	NA	NA	NA	FALSE
Abr	0.666316	6.33819	6.58624	0.000499724	ABR	-35037	556	11749	NA	41	NA	NA	NA	FALSE
Herpud1	0.66605	5.0057	6.80665	0.000416012	HERPUD1	NA	987	NA	NA	-195	NA	NA	NA	FALSE
Il23a	0.666016	1.41276	4.47155	0.00383961	IL23A	NA	NA	NA	NA	94	NA	NA	NA	FALSE
Snx21	0.665013	2.5474	4.17109	0.00538272	SNX21	NA	2723	NA	NA	89	NA	NA	7606	FALSE
Gm7866	0.663128	4.4895	4.13847	0.00558836	UBA52	NA	NA	NA	NA	NA	NA	NA	NA	FALSE
Evi5l	0.662854	2.89994	5.17059	0.00183912	NA	NA	NA	NA	NA	-802	NA	NA	NA	FALSE
Ccnjl	0.662278	2.15765	4.37186	0.00428868	NA	NA	1913	NA	167	NA	NA	NA	NA	FALSE
Prss16	0.662175	1.6618	3.99171	0.0066282	PRSS16	-10276	3228	NA	NA	NA	NA	NA	NA	FALSE
Sipa1l2	0.661095	7.26762	4.89729	0.00243281	SIPA1L2	-12160	10069	NA	NA	NA	NA	NA	NA	FALSE
Vamp8	0.660914	3.98381	7.63516	0.000217356	VAMP8	NA	558	NA	NA	-58	NA	NA	NA	FALSE
Dusp1	0.660732	5.62798	5.41194	0.00144829	DUSP1	-2846	NA	NA	NA	-45	NA	NA	NA	FALSE
Grhl3	0.659234	4.16962	4.37244	0.00428591	GRHL3	-3923	2369	25156	192	NA	NA	NA	NA	FALSE
Lamc2	0.655808	6.84909	14.1846	5.53192e-06	LAMC2	-5775	-40958	529	NA	-276	-33229	NA	NA	FALSE
Cdh3	0.65538	5.45594	5.99697	0.000836034	CDH3	-1476	210	NA	NA	NA	NA	NA	NA	FALSE
Peli3	0.654462	2.04609	5.17137	0.00183769	PELI3	NA	NA	NA	NA	-19	NA	NA	NA	FALSE
Prss8	0.654287	4.8078	7.64595	0.000215609	PRSS8	NA	1169	3078	NA	NA	NA	NA	-2124	FALSE
Podxl	0.654253	4.80766	8.87713	9.09928e-05	PODXL2	-3744	3414	NA	NA	48	NA	NA	NA	FALSE
Epcam	0.65405	6.60156	5.33358	0.00156381	EPCAM	-22544	180	NA	NA	NA	NA	NA	NA	FALSE
Sparc	0.653503	8.85562	8.28668	0.000135752	SPARC	-1327	1975	NA	NA	-644	NA	NA	25988	FALSE
Whsc1l1	0.652541	5.03273	10.4162	3.54611e-05	WHSC1L1	NA	-3524	NA	NA	93	NA	NA	35045	FALSE
Slc30a2	0.65136	4.40224	4.60262	0.00332723	SLC30A2	NA	1926	NA	203	NA	13744	NA	NA	FALSE
Spry2	0.651119	6.07557	4.14978	0.00551608	SPRY2	-4318	1874	3393	NA	-808	NA	NA	NA	FALSE
Nupr1	0.649566	5.15544	6.90105	0.000385146	NUPR1	11079	618	NA	NA	-136	NA	NA	2403	FALSE
4933407C03Rik	0.647974	4.64524	4.39559	0.00417666	NA	NA	NA	NA	NA	NA	NA	NA	NA	FALSE
Glt25d1	0.647532	8.23603	8.41488	0.000124205	COLGALT1	NA	NA	NA	NA	NA	NA	NA	NA	FALSE
Rnf19b	0.646613	6.19852	5.93936	0.000880948	RNF19B	-6218	NA	396	NA	NA	NA	NA	NA	FALSE
Hsdl1	0.646223	5.6533	5.65408	0.001148	HSDL1	NA	NA	NA	NA	271	NA	NA	NA	FALSE
Mtap1a	0.645573	3.4605	4.11224	0.00576004	NA	NA	NA	NA	NA	NA	NA	NA	NA	FALSE
Wwox	0.64273	3.60912	6.02376	0.000816038	WWOX	NA	381	NA	NA	NA	NA	NA	NA	FALSE
Tmem184b	0.642618	4.078	5.82478	0.00097868	TMEM184B	-5602	520	NA	NA	53	NA	NA	NA	FALSE
Sbno2	0.642064	5.85633	7.99317	0.000167147	SBNO2	NA	152	NA	NA	NA	NA	NA	NA	FALSE
Slc2a4	0.642048	1.80403	3.71939	0.00917675	SLC2A4	NA	NA	2870	NA	-156	NA	NA	NA	FALSE
mt-Nd4	0.637738	7.05182	6.84132	0.000404358	NA	NA	NA	NA	NA	NA	NA	NA	NA	FALSE
Dusp5	0.636382	2.10016	4.39637	0.00417305	DUSP5	23072	599	NA	NA	-136	NA	NA	NA	FALSE
Arrdc2	0.635075	4.62647	10.0533	4.37653e-05	ARRDC2	14505	-8283	NA	NA	-102	NA	NA	-1536	FALSE
Cdh1	0.633158	9.26589	14.3306	5.19794e-06	CDH1	-3691	534	NA	NA	NA	NA	NA	NA	TRUE
Fbxo44	0.630733	2.77758	4.19593	0.0052318	FBXO44	NA	NA	NA	NA	-220	NA	NA	NA	FALSE
Gse1	0.630719	5.29599	5.30088	0.00161509	GSE1	-1499	910	NA	NA	674	NA	NA	NA	FALSE
Slc22a18	0.625105	2.59432	5.04577	0.00208719	SLC22A18	-5774	5718	NA	NA	NA	NA	NA	NA	FALSE
Slc38a7	0.625085	5.55868	4.80022	0.00269351	SLC38A7	19955	537	NA	NA	NA	NA	NA	NA	FALSE
Chst15	0.623992	2.3276	5.64508	0.00115781	CHST15	-26203	NA	NA	NA	NA	NA	307	NA	FALSE
Nrarp	0.62315	2.40869	4.2538	0.0048982	NRARP	5225	NA	488	NA	NA	NA	NA	NA	FALSE
Fat1	0.622817	8.7182	10.8477	2.78474e-05	FAT1	-1033	7586	NA	NA	NA	NA	NA	NA	FALSE
Sugp2	0.62268	6.59574	9.26361	7.09008e-05	SUGP2	NA	-6073	NA	NA	NA	NA	NA	NA	FALSE
Nr4a1	0.62187	4.87012	4.94444	0.00231652	NR4A1	-10522	955	NA	NA	93	NA	NA	NA	FALSE
Mri1	0.621251	5.38623	8.33284	0.000131457	MRI1	NA	NA	NA	NA	NA	NA	NA	215	FALSE
Rbl2	0.621088	3.52475	7.60393	0.000222501	RBL2	-9226	431	NA	NA	NA	NA	NA	NA	FALSE
Myo9b	0.620228	7.21359	11.0647	2.4741e-05	MYO9B	NA	NA	NA	NA	824	NA	NA	NA	FALSE
Cnot1	0.618915	9.64008	13.4005	7.81143e-06	CNOT1	-17263	-8802	NA	NA	-454	NA	278	-14763	FALSE
2610005L07Rik	0.618865	7.36477	3.81286	0.00819666	NA	NA	NA	NA	NA	NA	NA	NA	NA	FALSE
Tk2	0.617471	4.67561	8.03275	0.000162461	TK2	NA	1862	136	NA	NA	NA	NA	NA	FALSE
Arhgef18	0.617389	7.53126	5.56103	0.00125415	ARHGEF18	NA	118	-4206	NA	NA	-3178	NA	-2160	FALSE
Syne2	0.616797	7.81287	11.0969	2.43161e-05	SYNE2	-12218	417	NA	NA	NA	NA	NA	NA	FALSE
Cyld	0.616443	4.93458	8.1879	0.000145494	CYLD	58429	108	NA	NA	NA	NA	NA	NA	FALSE
Ppp1r1a	0.613372	4.07148	4.63686	0.00320636	PPP1R1A	NA	NA	NA	NA	-120	NA	NA	7249	FALSE
Prx	0.612148	4.71789	4.60886	0.00330483	PRX	NA	9102	NA	NA	NA	NA	NA	NA	FALSE
Ebf1	0.610943	4.85792	6.51882	0.00052906	EBF1	-6401	384	NA	NA	-790	NA	NA	NA	FALSE
Cdk10	0.610657	5.45844	8.83315	9.36694e-05	CDK10	NA	NA	NA	NA	85	NA	NA	NA	FALSE
Wfdc2	0.608616	7.47998	12.5219	1.17698e-05	WFDC2	-3602	244	NA	NA	NA	NA	NA	NA	FALSE
Rassf1	0.608279	4.5226	6.65788	0.00047057	RASSF1	NA	NA	NA	NA	-6	NA	NA	NA	FALSE
Cherp	0.6052	5.84149	9.80381	5.07805e-05	CHERP	NA	348	NA	NA	NA	-4637	NA	NA	FALSE
Gm10033	0.605059	2.8006	4.04692	0.00621365	NA	-3931	NA	NA	NA	-31	NA	NA	NA	FALSE
Myst3	0.602922	6.4771	11.5155	1.94809e-05	NA	NA	NA	NA	NA	NA	NA	NA	NA	FALSE
Def8	0.602715	6.95569	10.0889	4.28584e-05	DEF8	NA	848	4631	NA	3	NA	NA	NA	FALSE
Syde2	0.602146	6.18429	5.84186	0.000963358	SYDE2	-1272	17019	482	NA	NA	NA	NA	NA	FALSE
Zbtb32	0.601387	2.93207	5.94338	0.000877729	ZBTB32	-7279	NA	NA	NA	NA	NA	NA	NA	FALSE
Gm17561	0.601245	2.22477	4.56697	0.00345856	NA	NA	NA	NA	NA	NA	NA	NA	NA	FALSE
Gpt2	0.598286	6.97317	5.48582	0.00134813	GPT2	-10527	6312	NA	NA	-96	NA	NA	NA	FALSE
Fam125a	0.598083	5.28676	6.28752	0.000645701	NA	NA	NA	NA	NA	NA	NA	NA	NA	FALSE
C130039O16Rik	0.597758	5.79428	8.00441	0.0001658	NA	NA	NA	NA	NA	NA	NA	NA	NA	FALSE
Zfp819	0.596456	5.1784	4.73825	0.00287633	NA	NA	977	NA	NA	39	NA	NA	NA	FALSE
Bcar3	0.595599	6.03978	4.09457	0.00587896	BCAR3	-13155	14084	NA	364	NA	NA	NA	NA	FALSE
Lrfn1	0.593435	2.40175	3.93765	0.00706397	LRFN1	NA	NA	NA	NA	67	NA	NA	-4515	TRUE
Mmgt2	0.593002	1.47359	3.74158	0.00893282	NA	27252	12436	NA	NA	NA	NA	NA	NA	FALSE
Nagk	0.591437	4.1567	6.85222	0.000400771	NAGK	NA	NA	NA	NA	71	NA	NA	NA	FALSE
Ssbp4	0.590937	5.53215	5.25271	0.00169412	SSBP4	-1647	3967	NA	NA	NA	NA	NA	NA	FALSE
A4galt	0.590439	6.56162	5.40224	0.00146204	A4GALT	-3134	518	NA	NA	NA	-48697	NA	NA	FALSE
Cltb	0.588127	5.7854	4.0371	0.00628526	CLTB	-5219	273	NA	NA	-157	NA	NA	NA	FALSE
Tada3	0.586939	5.95632	4.3765	0.0042665	TADA3	12688	2895	NA	NA	NA	NA	NA	NA	FALSE
Tmod2	0.584831	3.48331	5.14746	0.00188246	TMOD2	NA	399	NA	NA	NA	NA	NA	NA	FALSE
Tjp3	0.58464	5.61346	3.72267	0.00914021	TJP3	NA	364	NA	NA	-112	NA	NA	NA	FALSE
Tom1	0.584126	4.66493	8.12559	0.000152051	TOM1	NA	742	NA	NA	71	NA	NA	NA	FALSE
Cog2	0.581797	5.73541	11.1609	2.34935e-05	COG2	-22279	NA	NA	NA	-61	NA	NA	NA	FALSE
Arhgef10	0.581398	2.52097	3.7658	0.00867477	ARHGEF10	-5357	11393	NA	NA	-38	NA	NA	NA	FALSE
Cmtm4	0.580875	4.20093	5.83199	0.000972176	CMTM4	-15296	18917	236	NA	NA	NA	NA	NA	FALSE
Padi2	0.580813	4.72161	7.61278	0.00022103	PADI2	NA	NA	154	NA	-752	NA	NA	NA	FALSE

## Sheet: Dnttip1 bound down
Gene	log2FC_Dnttip1KO_vs_WT	AveExpr_Dnttip1KO_vs_WT	T.Value_Dnttip1KO_vs_WT	P.Value_Dnttip1KO_vs_WT	HomoSapiens.Gene	Intergenic_NearestPeakDistance	Intron_NearestPeakDistance	Exon_NearestPeakDistance	5'UTR_NearestPeakDistance	Promoter-TSS_NearestPeakDistance	3'UTR_NearestPeakDistance	Non-coding_NearestPeakDistance	TTS_NearestPeakDistance	GO_NEURON_DIFFERENTIATION_844
AY036118	-8.56169	6.96468	-6.14163	0.000734286	NA	NA	NA	NA	NA	NA	NA	NA	NA	FALSE
Peg10	-6.97863	1.74163	-5.69936	0.00110005	PEG10	NA	1651	NA	NA	NA	NA	NA	NA	FALSE
Meg3	-5.15107	-1.36568	-16.1299	2.52701e-06	NA	NA	7925	NA	NA	NA	NA	NA	NA	FALSE
Rian	-4.73371	0.4937	-15.1041	3.77421e-06	NA	NA	NA	NA	NA	NA	NA	NA	NA	FALSE
Nxf3	-4.72441	1.47986	-18.0978	1.2482e-06	NXF3	NA	NA	NA	NA	NA	NA	NA	NA	FALSE
C330008G21Rik	-4.41069	0.503096	-9.32242	6.83143e-05	NA	NA	NA	NA	NA	NA	NA	NA	NA	FALSE
En1	-4.24524	-1.72945	-14.0213	5.93507e-06	EN1	27967	2661	935	NA	44	NA	NA	NA	TRUE
Nnat	-4.07876	-1.15523	-7.16781	0.000311142	NNAT	-37311	1372	NA	NA	NA	NA	NA	NA	TRUE
Rgs6	-3.86631	-1.62294	-7.7438	0.000200489	RGS6	-5200	NA	NA	NA	26	NA	NA	NA	FALSE
Slit3	-3.78917	-0.762156	-8.53647	0.000114283	SLIT3	-7922	1560	NA	NA	-119	NA	NA	NA	TRUE
Gm10801	-3.65758	-1.55902	-8.46555	0.000119955	NA	NA	NA	NA	NA	NA	NA	NA	NA	FALSE
Gm9	-3.64929	-2.27467	-8.5156	0.00011592	NA	NA	NA	NA	NA	NA	NA	NA	NA	FALSE
Sgce	-3.58995	-0.107805	-7.97743	0.000169052	SGCE	NA	1022	NA	NA	371	NA	NA	NA	FALSE
Mmp16	-3.58441	0.705095	-16.0659	2.58922e-06	MMP16	542196	384	NA	NA	NA	NA	NA	NA	FALSE
1700048O20Rik	-3.57995	-1.96112	-5.56545	0.00124886	NA	NA	NA	NA	NA	NA	NA	NA	NA	FALSE
Gria4	-3.35541	-1.11824	-12.3953	1.25135e-05	GRIA4	NA	NA	NA	NA	-61	NA	NA	NA	FALSE
H19	-3.22938	-1.63216	-5.62624	0.00117865	NA	-3369	NA	NA	NA	NA	NA	NA	NA	FALSE
Dner	-3.18933	2.21897	-11.8617	1.63079e-05	DNER	NA	NA	NA	NA	NA	NA	NA	NA	FALSE
Rhox2a	-3.18797	-1.80481	-9.46378	6.25292e-05	NA	NA	NA	NA	NA	NA	NA	NA	NA	FALSE
Foxn4	-3.1654	0.124568	-11.7023	1.76884e-05	FOXN4	-2156	NA	25472	NA	-405	NA	NA	NA	TRUE
Cd59a	-3.15229	-0.199494	-14.1637	5.58171e-06	NA	NA	3301	NA	NA	11	NA	NA	NA	FALSE
Nlrp4c	-3.1441	-1.35982	-8.16188	0.000148192	NLRP4	NA	NA	NA	NA	NA	NA	NA	NA	FALSE
Fermt1	-3.09396	1.73294	-12.8556	1.00414e-05	FERMT1	-44010	NA	NA	354	NA	NA	NA	NA	FALSE
Gdpd3	-3.09216	0.462548	-18.1255	1.23654e-06	GDPD3	NA	NA	NA	NA	NA	NA	NA	NA	FALSE
Kcnq5	-3.00314	-1.09386	-8.7137	0.000101408	KCNQ5	-137376	244879	708	NA	NA	NA	NA	NA	FALSE
Slc39a8	-2.94698	-0.985393	-5.17709	0.00182714	SLC39A8	-57658	NA	NA	NA	NA	NA	NA	NA	FALSE
Tex13	-2.88736	1.60181	-10.9649	2.61168e-05	TEX13B	37126	NA	NA	NA	NA	NA	NA	NA	FALSE
Xlr5a	-2.87885	-1.54542	-7.17657	0.000309004	NA	NA	NA	NA	NA	NA	NA	NA	NA	FALSE
Gm364	-2.82111	-1.52012	-6.33055	0.000621942	NA	NA	NA	NA	NA	NA	NA	NA	NA	FALSE
Efhc2	-2.78285	-0.576344	-12.2203	1.3633e-05	EFHC2	-85040	NA	NA	NA	-47	NA	NA	NA	FALSE
Syt4	-2.75144	-1.39027	-11.0154	2.5411e-05	SYT4	48671	NA	NA	112	NA	NA	NA	NA	FALSE
Slfn3	-2.72455	-0.191004	-5.60232	0.00120573	SLFN12L	NA	NA	NA	NA	NA	NA	NA	NA	FALSE
BC064078	-2.72109	1.24588	-17.0377	1.80746e-06	NA	NA	108	NA	NA	NA	NA	NA	NA	FALSE
Cdkl4	-2.67474	0.329105	-10.6483	3.11047e-05	CDKL4	-11266	848	NA	NA	NA	39788	NA	NA	FALSE
Tmem117	-2.65464	0.531226	-5.57654	0.00123571	TMEM117	-8008	12379	NA	NA	-122	NA	NA	NA	FALSE
Gad2	-2.62166	-0.303471	-12.3631	1.27112e-05	GAD2	-2185	-4349	1462	NA	-23	NA	NA	NA	FALSE
Trpc6	-2.55953	0.494394	-4.45215	0.00392268	TRPC6	-81036	NA	NA	NA	NA	NA	NA	NA	TRUE
Cadps2	-2.53127	-0.19849	-6.83804	0.000405444	CADPS2	NA	712	NA	NA	-257	NA	NA	NA	FALSE
Tspan7	-2.50889	1.04633	-9.19011	7.4293e-05	TSPAN7	NA	NA	NA	NA	NA	NA	NA	NA	FALSE
Apba2	-2.5073	1.14842	-10.9147	2.68423e-05	APBA2	-4189	50484	NA	NA	202	NA	NA	NA	FALSE
Arntl2	-2.47247	1.44855	-4.71991	0.00293308	ARNTL2	-9475	NA	NA	NA	NA	-28862	NA	NA	FALSE
Hmgcll1	-2.44831	-1.1651	-8.39743	0.000125708	HMGCLL1	NA	224	NA	NA	NA	NA	NA	NA	FALSE
Ccrn4l	-2.44565	5.34054	-11.4015	2.06778e-05	CCRN4L	NA	NA	NA	NA	NA	NA	NA	NA	FALSE
Flt4	-2.42877	0.333875	-16.3316	2.34212e-06	FLT4	NA	393	24365	NA	NA	NA	NA	NA	FALSE
Lipa	-2.40768	1.81405	-5.72111	0.00107783	LIPA	NA	NA	NA	NA	NA	NA	NA	NA	FALSE
Hmgn3	-2.40656	-0.0704047	-9.38578	6.56483e-05	NA	NA	NA	NA	NA	NA	NA	NA	NA	FALSE
Ror1	-2.39562	-0.53723	-8.42858	0.000123039	ROR1	NA	922	NA	NA	NA	NA	NA	NA	FALSE
Heph	-2.39383	2.56372	-5.57436	0.00123828	HEPH	NA	NA	NA	NA	NA	NA	NA	NA	FALSE
Gsx2	-2.37664	-1.35934	-7.4858	0.000243268	GSX2	4147	NA	NA	NA	-783	NA	NA	NA	TRUE
Alcam	-2.3555	1.49469	-4.48428	0.00378614	ALCAM	-23161	2329	NA	NA	-105	NA	NA	NA	TRUE
Hist1h1t	-2.33541	0.94949	-8.50319	0.000116905	HIST1H1T	NA	NA	NA	NA	NA	NA	NA	NA	FALSE
Wnt7b	-2.32762	-0.0875739	-6.51751	0.000529648	WNT7B	-29037	5207	NA	NA	-106	NA	NA	NA	TRUE
Serpina3m	-2.32297	0.772615	-8.94968	8.67671e-05	SERPINA3	-4899	NA	NA	NA	NA	NA	NA	NA	FALSE
Xlr3a	-2.32197	2.21224	-10.6372	3.12971e-05	NA	NA	NA	NA	NA	NA	NA	NA	NA	FALSE
Rhox1	-2.31628	-0.838732	-6.62268	0.000484645	NA	NA	NA	NA	NA	NA	NA	NA	NA	FALSE
Pnma5	-2.31142	2.66882	-24.2021	2.08057e-07	PNMA5	NA	NA	NA	NA	NA	NA	NA	NA	FALSE
Nsg2	-2.30925	-1.18317	-6.68186	0.000461245	HMP19	-13254	19187	NA	NA	-318	NA	NA	NA	FALSE
Xlr4a	-2.30572	0.614027	-8.43045	0.000122881	NA	NA	NA	NA	NA	NA	NA	NA	NA	FALSE
Rab39b	-2.28062	0.336876	-4.15818	0.00546311	RAB39B	NA	NA	NA	NA	NA	NA	NA	NA	FALSE
Rhox4a	-2.25895	-0.953487	-5.71606	0.00108294	NA	NA	NA	NA	NA	NA	NA	NA	NA	FALSE
Gm9732	-2.24916	1.21979	-4.36035	0.00434422	NA	NA	NA	NA	NA	NA	NA	NA	NA	FALSE
Hist3h2ba	-2.24672	3.47883	-31.2673	4.2544e-08	HIST1H2BD	NA	NA	NA	NA	43	NA	NA	NA	FALSE
Chrna9	-2.24333	0.569353	-11.5263	1.93718e-05	CHRNA9	NA	8963	719	NA	NA	NA	NA	NA	FALSE
Herc6	-2.22156	-0.457001	-5.88007	0.000930061	HERC6	NA	NA	NA	NA	78	NA	NA	NA	FALSE
Crispld1	-2.20001	1.3855	-11.3859	2.08479e-05	CRISPLD1	NA	-40286	NA	NA	NA	NA	NA	NA	FALSE
Gpr83	-2.19287	0.377921	-4.00752	0.0065064	GPR83	-1203	NA	NA	NA	-84	NA	NA	NA	FALSE
Ccnd2	-2.16337	0.200106	-10.3224	3.74195e-05	CCND2	NA	-1587	376	NA	NA	NA	NA	NA	FALSE
Neu3	-2.13833	0.968617	-13.0125	9.3317e-06	NEU3	NA	NA	-11404	NA	NA	NA	NA	NA	FALSE
Gm11019	-2.1351	6.02254	-23.8574	2.27354e-07	NA	NA	NA	NA	NA	NA	NA	NA	NA	FALSE
Fndc1	-2.13271	-0.771543	-6.66798	0.000466616	NA	152849	NA	NA	NA	NA	NA	NA	NA	FALSE
B230314M03Rik	-2.1256	0.618501	-6.86791	0.000395672	NA	NA	NA	NA	NA	NA	NA	NA	NA	FALSE
Ano3	-2.10417	0.996306	-15.3554	3.41295e-06	ANO3	NA	271	NA	NA	NA	NA	NA	NA	FALSE
Abcc2	-2.08465	-0.403257	-8.70726	0.000101846	ABCC2	NA	21653	NA	NA	NA	NA	NA	NA	FALSE
Usp9y	-2.08026	-1.01198	-8.88079	9.07737e-05	USP9Y	NA	NA	NA	NA	NA	NA	NA	NA	FALSE
Mthfd2l	-2.03106	2.06964	-13.2355	8.41995e-06	MTHFD2L	NA	NA	NA	NA	-118	NA	NA	NA	FALSE
4930502E18Rik	-2.01507	0.87284	-8.02026	0.000163924	NA	NA	NA	NA	NA	NA	NA	NA	NA	FALSE
Penk	-2.01062	-0.0734232	-8.18721	0.000145565	PENK	-87922	NA	NA	NA	NA	NA	NA	NA	FALSE
Ccdc85a	-2.00795	2.25604	-5.81412	0.000988383	CCDC85A	218634	46004	972	NA	NA	NA	NA	NA	FALSE
Ept1	-2.00146	4.43731	-7.33845	0.000272356	EPT1	NA	NA	NA	NA	NA	NA	NA	NA	FALSE
Pla2g16	-1.9922	0.0156941	-5.54707	0.00127101	PLA2G16	NA	163	NA	NA	NA	NA	NA	NA	FALSE
Jph1	-1.98561	-0.686201	-6.5315	0.000523393	JPH1	NA	NA	NA	NA	NA	NA	NA	NA	FALSE
Cacng7	-1.95321	0.375627	-9.44316	6.33368e-05	CACNG7	NA	-8427	NA	NA	NA	NA	NA	NA	FALSE
Prex2	-1.94288	0.872448	-10.2608	3.87733e-05	PREX2	66199	-12700	NA	NA	NA	NA	NA	NA	TRUE
4930550L24Rik	-1.94091	-0.379759	-4.89699	0.00243356	NA	NA	NA	NA	NA	NA	NA	NA	NA	FALSE
Vstm2a	-1.93855	0.388926	-9.20285	7.36917e-05	VSTM2A	87861	NA	NA	NA	29	NA	NA	NA	FALSE
Kif1a	-1.88543	1.46147	-12.1732	1.39537e-05	KIF1A	-13368	878	NA	NA	NA	NA	NA	NA	FALSE
Raet1c	-1.85732	1.62758	-7.49827	0.000240975	NA	NA	NA	NA	NA	NA	NA	NA	NA	FALSE
Fam115a	-1.84823	1.81467	-11.3254	2.15246e-05	FAM115A	NA	NA	NA	NA	NA	NA	NA	NA	FALSE
Colec12	-1.84675	2.16603	-5.3075	0.00160455	COLEC12	NA	18908	NA	NA	NA	NA	NA	NA	FALSE
Pde1c	-1.83926	-0.976569	-3.91658	0.00724241	PDE1C	-111630	69958	NA	NA	NA	NA	NA	NA	FALSE
Fbn2	-1.83778	0.522284	-6.33176	0.000621289	FBN2	NA	38299	128528	NA	-543	NA	NA	NA	FALSE
Nrp2	-1.82949	4.45172	-4.68559	0.0030427	NRP2	-1996	3515	NA	NA	87	NA	NA	NA	TRUE
Gm20548	-1.82596	-0.557209	-4.16231	0.00543725	NA	NA	NA	NA	NA	NA	NA	NA	NA	FALSE
Xlr3b	-1.81119	1.99817	-4.54966	0.00352442	NA	NA	NA	NA	NA	NA	NA	NA	NA	FALSE
Fgf15	-1.80849	-0.968946	-8.46457	0.000120035	FGF19	-7532	NA	NA	NA	-285	NA	NA	NA	FALSE
Btla	-1.80533	-0.836067	-6.55388	0.000513566	BTLA	NA	NA	NA	NA	NA	NA	NA	NA	FALSE
Gm12260	-1.80403	2.08301	-12.7817	1.03973e-05	NA	NA	NA	NA	NA	NA	NA	NA	NA	FALSE
Prrg1	-1.80096	-0.555919	-5.11697	0.00194137	PRRG1	NA	474	NA	NA	22	NA	NA	NA	FALSE
Pla2g4a	-1.79781	2.75766	-9.98255	4.56352e-05	PLA2G4A	1440912	-6930	NA	NA	NA	NA	NA	NA	FALSE
Trim36	-1.75721	-0.275682	-4.37675	0.00426531	TRIM36	-13355	NA	285	NA	-249	NA	NA	NA	FALSE
Hr	-1.75473	1.30935	-5.48959	0.00134324	HR	NA	NA	NA	NA	NA	NA	NA	NA	FALSE
Loxl4	-1.72266	3.31725	-12.1806	1.39023e-05	LOXL4	-1212	24498	NA	NA	-57	NA	NA	NA	FALSE
Hs6st2	-1.71746	-0.541319	-8.73299	0.000100109	HS6ST2	-1481	NA	NA	NA	280	NA	NA	NA	FALSE
Grm4	-1.71281	0.251189	-8.54299	0.000113778	GRM4	-2107	1946	768	NA	NA	NA	NA	NA	FALSE
Hhip	-1.71159	1.32159	-14.2706	5.33234e-06	HHIP	-61453	1968	NA	360	NA	NA	NA	NA	FALSE
Zc3h12b	-1.70898	-0.753346	-6.76571	0.000430269	ZC3H12B	NA	NA	NA	NA	62	NA	NA	NA	FALSE
Smpdl3a	-1.69558	0.478864	-5.25933	0.00168301	SMPDL3A	34341	NA	NA	NA	NA	NA	NA	NA	FALSE
Cnksr2	-1.6948	1.01133	-7.21316	0.000300249	CNKSR2	-442669	NA	NA	NA	-331	NA	NA	NA	FALSE
She	-1.68938	1.28256	-8.19441	0.000144828	SHE	-4790	2347	NA	NA	-200	NA	NA	37455	FALSE
Fndc4	-1.67713	1.1644	-5.91068	0.000904333	FNDC4	NA	NA	NA	NA	87	NA	NA	NA	FALSE
Otud6a	-1.67027	-0.324125	-4.17825	0.00533871	OTUD6A	NA	NA	NA	NA	NA	NA	NA	NA	FALSE
Itga10	-1.66481	-0.0118065	-7.23478	0.000295211	ITGA10	NA	NA	NA	NA	NA	NA	NA	NA	FALSE
Pde3b	-1.66371	2.4354	-14.939	4.03576e-06	PDE3B	NA	63829	NA	NA	NA	NA	NA	NA	FALSE
Fabp5	-1.65011	5.31767	-11.2513	2.23864e-05	FABP5	-25383	588	NA	NA	-156	NA	NA	NA	FALSE
Ltk	-1.64988	-0.0220948	-4.06686	0.0060711	LTK	NA	646	NA	NA	NA	NA	NA	NA	FALSE
D630039A03Rik	-1.64789	3.13533	-5.02549	0.00213096	C9orf152	-3788	1637	NA	NA	-329	NA	NA	NA	FALSE
Crabp1	-1.64423	2.22631	-5.1288	0.00191828	CRABP1	36739	1085	NA	NA	NA	NA	NA	8331	FALSE
Itga8	-1.62678	-0.945929	-7.52936	0.000235362	ITGA8	-25429	NA	NA	NA	NA	NA	NA	NA	FALSE
Nrcam	-1.62236	2.44213	-5.53472	0.00128615	NRCAM	-3961	9612	NA	199	NA	NA	NA	NA	TRUE
Trpa1	-1.61491	3.69193	-13.4692	7.57285e-06	TRPA1	-110865	NA	121	NA	NA	NA	NA	NA	FALSE
Tmprss5	-1.60495	-0.709288	-4.85428	0.00254463	TMPRSS5	-20888	7751	6280	NA	NA	NA	NA	NA	FALSE
Inhbb	-1.59259	0.492855	-8.21937	0.000142306	INHBB	-1504	1752	1297	NA	NA	NA	NA	NA	FALSE
Hist3h2bb-ps	-1.59132	3.17165	-16.5075	2.19353e-06	HIST3H2BB	NA	NA	NA	NA	NA	NA	NA	NA	FALSE
Tmem28	-1.58876	0.901078	-5.54605	0.00127226	FAM155B	-1084	NA	NA	NA	NA	NA	NA	NA	FALSE
Bag2	-1.58371	1.27825	-6.94943	0.000370347	BAG2	NA	1760	NA	NA	78	NA	NA	14618	FALSE
Mid1ip1	-1.58366	2.83339	-10.7062	3.01155e-05	MID1IP1	-2540	NA	NA	NA	-2	NA	NA	NA	FALSE
Sema3e	-1.57702	-0.476586	-6.30866	0.000633898	SEMA3E	-42704	6856	NA	NA	NA	NA	NA	NA	FALSE
Nfasc	-1.57212	0.467619	-6.21698	0.000686917	NFASC	-7323	3593	NA	NA	51	NA	NA	NA	TRUE
Abat	-1.56729	0.077554	-5.8486	0.00095739	ABAT	-18848	10526	NA	NA	-132	NA	NA	NA	FALSE
Tgfbr3	-1.56211	1.19418	-8.20361	0.000143892	TGFBR3	NA	2040	NA	NA	NA	NA	NA	NA	FALSE
Dach2	-1.56055	0.409562	-5.27964	0.00164941	DACH2	NA	275716	442	NA	NA	NA	NA	NA	FALSE
9030418K01Rik	-1.55784	0.259892	-5.34369	0.00154834	NA	NA	NA	NA	NA	NA	NA	NA	NA	FALSE
Luzp4	-1.55572	-0.704542	-5.15564	0.00186701	NA	NA	NA	NA	NA	NA	NA	NA	NA	FALSE
Pak3	-1.5443	0.0292801	-4.52535	0.00361931	PAK3	-35527	-10606	NA	NA	NA	NA	NA	NA	TRUE
Nkx1-2	-1.54202	2.8713	-7.34391	0.000271209	NKX1-2	-1460	NA	NA	NA	-458	NA	NA	NA	FALSE
Notum	-1.54032	6.74369	-20.2673	6.22113e-07	NOTUM	-1142	1532	NA	NA	42	NA	NA	NA	FALSE
Ptpla	-1.5339	1.70617	-9.39442	6.52942e-05	PTPLA	NA	NA	NA	NA	NA	NA	NA	NA	FALSE
Fgfr2	-1.53309	1.93795	-12.153	1.40935e-05	FGFR2	-102200	1814	NA	561	NA	NA	NA	NA	TRUE
Kctd12b	-1.53307	0.73194	-5.8453	0.000960304	NA	27746	NA	NA	NA	NA	NA	NA	NA	FALSE
CAAA01202134.1.17058.1	-1.52591	0.626175	-4.67021	0.00309331	NA	NA	NA	NA	NA	NA	NA	NA	NA	FALSE
Cyp2b23	-1.52221	-0.719515	-3.72495	0.00911494	NA	-8390	18610	NA	NA	NA	NA	NA	NA	FALSE
Ptgs2	-1.52005	1.90823	-3.91514	0.00725476	PTGS2	15618	NA	NA	NA	NA	NA	NA	NA	FALSE
Cyp7b1	-1.5121	2.4356	-8.45471	0.000120849	CYP7B1	-13436	87788	NA	NA	53	NA	NA	NA	FALSE
Slc30a3	-1.50959	1.84195	-5.46625	0.00137388	SLC30A3	-1711	1545	16847	NA	91	NA	NA	NA	FALSE
AC120136.3	-1.50659	4.84157	-8.5301	0.00011478	NA	NA	NA	NA	NA	NA	NA	NA	NA	FALSE
Ikzf1	-1.50291	0.253011	-5.33726	0.00155816	IKZF1	-28679	NA	NA	168	-753	NA	NA	NA	FALSE
Usp26	-1.50247	1.32542	-11.949	1.56044e-05	USP26	NA	NA	NA	NA	NA	NA	NA	NA	FALSE
Adamts13	-1.50238	-0.188649	-7.77798	0.000195496	ADAMTS13	NA	NA	NA	NA	NA	NA	NA	NA	FALSE
T	-1.50015	-0.543595	-6.07484	0.000779402	T	-4274	-19842	NA	NA	NA	NA	NA	NA	FALSE
Gm6166	-1.48674	0.689098	-3.87891	0.00757391	NA	NA	NA	NA	NA	NA	NA	NA	NA	FALSE
Chst11	-1.47889	1.2484	-4.34741	0.00440758	CHST11	NA	4234	NA	NA	-134	NA	NA	NA	FALSE
Slc16a3	-1.47428	3.26469	-5.93187	0.000886993	SLC16A3	NA	1926	NA	NA	NA	NA	NA	NA	FALSE
Tmem132c	-1.47316	1.50114	-10.2355	3.93449e-05	TMEM132C	-7297	677	NA	NA	-117	NA	NA	NA	FALSE
Rgnef	-1.46704	-0.214541	-5.22212	0.00174657	NA	NA	NA	NA	NA	NA	NA	NA	NA	FALSE
Ptger4	-1.46622	0.828042	-6.85585	0.000399585	PTGER4	-3369	2211	NA	NA	NA	NA	NA	NA	FALSE
Fat2	-1.46217	3.4186	-11.6709	1.79757e-05	FAT2	-7662	10149	NA	NA	NA	NA	NA	NA	FALSE
Ptchd3	-1.44997	-0.507785	-6.52286	0.000527247	PTCHD3	17771	NA	182	NA	NA	NA	NA	NA	FALSE
3632451O06Rik	-1.42655	3.87602	-9.06801	8.03494e-05	C14orf37	-35321	340	NA	NA	NA	NA	NA	NA	FALSE
Rsph4a	-1.41895	0.369585	-4.698	0.00300256	RSPH4A	NA	NA	453	NA	NA	NA	NA	NA	FALSE
Gm14074	-1.41876	1.68675	-4.3209	0.0045407	NA	NA	NA	NA	NA	NA	NA	NA	NA	FALSE
Rims1	-1.41829	3.74087	-20.1174	6.51219e-07	RIMS1	NA	267525	NA	NA	NA	NA	NA	NA	FALSE
Bin1	-1.41771	2.16676	-11.1816	2.32349e-05	BIN1	-61605	NA	NA	NA	-152	NA	NA	NA	FALSE
Zcchc18	-1.4159	0.236592	-6.78215	0.000424478	ZCCHC18	NA	NA	NA	NA	-43	NA	NA	NA	FALSE
Vopp1	-1.40506	1.47276	-10.3381	3.70838e-05	VOPP1	NA	NA	NA	NA	19	NA	NA	NA	FALSE
Nalcn	-1.40357	0.242366	-6.70758	0.000451483	NALCN	NA	39566	NA	311	NA	NA	NA	NA	FALSE
Krtdap	-1.40346	1.67965	-4.60304	0.00332574	KRTDAP	-1797	2296	NA	NA	-307	NA	NA	NA	FALSE
Cpvl	-1.39515	1.68048	-5.89445	0.000917873	CPVL	NA	10678	NA	NA	NA	NA	NA	NA	FALSE
Cend1	-1.3932	-0.549045	-4.31651	0.0045632	CEND1	NA	NA	NA	NA	-8	NA	NA	NA	TRUE
Tcf15	-1.38312	-0.553998	-3.66745	0.00977685	TCF15	13041	NA	NA	NA	NA	NA	NA	NA	FALSE
Rsad2	-1.37785	-0.288202	-4.24967	0.00492119	RSAD2	NA	NA	324	NA	NA	NA	NA	NA	FALSE
Ncam1	-1.36977	5.0058	-24.5902	1.88558e-07	NCAM1	-30769	1728	NA	273	NA	NA	NA	NA	TRUE
Stc2	-1.36308	2.82304	-8.22457	0.000141787	STC2	-1594	629	NA	NA	NA	NA	NA	NA	FALSE
Tex19.1	-1.36276	5.50085	-23.0297	2.82808e-07	NA	NA	NA	NA	NA	11	NA	NA	NA	FALSE
U4	-1.36194	2.77472	-5.05714	0.0020631	NA	NA	NA	NA	NA	NA	NA	NA	NA	FALSE
Tceal1	-1.3532	-0.21464	-6.59332	0.000496752	TCEAL1	NA	NA	NA	NA	NA	NA	NA	NA	FALSE
Sfrp2	-1.3464	1.66185	-3.92629	0.00715959	SFRP2	-14776	NA	NA	NA	-110	NA	NA	NA	FALSE
Adamts1	-1.34436	0.114413	-5.65326	0.00114888	ADAMTS1	-1359	1556	NA	NA	-74	NA	NA	NA	FALSE
Man1a	-1.34399	1.15036	-6.11658	0.000750847	MAN1A1	NA	NA	1169	NA	51	NA	NA	NA	FALSE
Mlf1	-1.3276	-0.614731	-4.10313	0.00582104	MLF1	NA	NA	NA	NA	NA	NA	NA	NA	FALSE
Taf9b	-1.32605	-0.161098	-5.6633	0.00113804	TAF9B	NA	NA	NA	NA	NA	NA	NA	NA	FALSE
Cpne8	-1.32561	-0.0101708	-5.40793	0.00145396	CPNE8	NA	NA	NA	NA	NA	NA	NA	NA	FALSE
Ltbp1	-1.31285	2.44034	-6.20269	0.000695626	LTBP1	-11394	-5752	600	NA	-366	NA	NA	NA	FALSE
Cdk14	-1.30871	0.151372	-6.94967	0.000370274	CDK14	NA	7029	NA	NA	NA	NA	NA	NA	FALSE
SNORA79	-1.30712	1.4561	-4.09926	0.00584715	NA	NA	NA	NA	NA	NA	NA	NA	NA	FALSE
Klhl13	-1.30468	6.03965	-5.02382	0.00213461	KLHL13	-3428	237	NA	NA	NA	NA	NA	NA	FALSE
Ankrd35	-1.30382	5.23475	-5.76134	0.00103806	ANKRD35	NA	5135	NA	NA	-83	-6729	NA	NA	FALSE
Gpc1	-1.29916	4.19716	-11.7116	1.76043e-05	GPC1	-56701	1121	NA	NA	64	NA	NA	NA	TRUE
Fbln7	-1.29178	0.0354526	-5.98492	0.000845211	FBLN7	NA	3822	28542	NA	NA	NA	NA	NA	FALSE
2810417H13Rik	-1.29129	5.17422	-6.48097	0.000546386	KIAA0101	NA	276	NA	NA	NA	NA	NA	NA	FALSE
Hecw2	-1.28743	1.18464	-4.32662	0.00451159	HECW2	NA	305	NA	NA	NA	NA	NA	NA	FALSE
Scml2	-1.28525	1.06145	-7.01908	0.000350166	NA	NA	NA	NA	269	NA	NA	NA	NA	FALSE
Sohlh2	-1.28351	2.97555	-7.5668	0.000228801	CCDC169-SOHLH2	NA	NA	NA	NA	-94	NA	NA	NA	FALSE
Dnttip1	-1.28243	3.29774	-4.87587	0.00248779	DNTTIP1	NA	NA	NA	NA	NA	NA	NA	NA	FALSE
Ano1	-1.27815	1.71958	-4.97289	0.00224938	ANO1	NA	6589	NA	NA	NA	NA	NA	NA	FALSE
Msc	-1.27607	4.18196	-17.1224	1.7534e-06	MSC	-1096	NA	259	NA	NA	NA	NA	NA	FALSE
Cabp7	-1.26923	0.142141	-4.6439	0.00318211	CABP7	-10310	385	NA	NA	-995	NA	NA	NA	FALSE
5730469M10Rik	-1.26831	4.51713	-6.95678	0.000368154	NA	NA	NA	NA	NA	NA	NA	NA	NA	FALSE
Sstr2	-1.26784	1.67075	-5.37205	0.00150584	SSTR2	-1883	NA	NA	NA	-344	NA	NA	NA	FALSE
Tmem47	-1.26437	5.15634	-6.03258	0.000809572	TMEM47	-194138	NA	392	NA	-160	NA	NA	NA	FALSE
Spats2l	-1.26246	4.40807	-4.61606	0.00327917	SPATS2L	-161990	361	NA	NA	-706	NA	NA	NA	FALSE
Tmem90b	-1.26217	0.68344	-6.08613	0.000771561	NA	NA	NA	NA	NA	NA	NA	NA	NA	FALSE
Slc25a27	-1.25993	0.488111	-4.07798	0.00599316	SLC25A27	NA	4551	NA	NA	-136	NA	NA	NA	FALSE
6030419C18Rik	-1.25895	0.519921	-4.68234	0.00305334	C15orf59	NA	NA	NA	1247	NA	NA	NA	NA	FALSE
Snora74a	-1.25267	4.86827	-7.09481	0.000329637	NA	NA	NA	NA	NA	NA	NA	NA	2285	FALSE
Cdh2	-1.24246	3.07281	-12.0605	1.4757e-05	CDH2	318382	68290	NA	559	-495	NA	NA	NA	FALSE
Arhgap31	-1.23923	-0.686331	-4.63353	0.00321789	ARHGAP31	NA	33651	NA	NA	-113	NA	NA	NA	FALSE
Pcsk9	-1.2384	2.84557	-3.69279	0.00947882	PCSK9	NA	NA	27485	NA	NA	NA	NA	NA	TRUE
2018-09-06	-1.23608	2.74713	-6.11296	0.000753278	2018-09-06	NA	NA	NA	NA	-53	NA	NA	NA	FALSE
Napsa	-1.23556	0.492618	-3.94224	0.00702581	NAPSA	NA	NA	NA	NA	-447	NA	NA	NA	FALSE
Gad1	-1.23453	1.73524	-9.73601	5.29046e-05	GAD1	NA	-3132	NA	NA	-172	NA	NA	NA	FALSE
Gprc5b	-1.23077	3.14179	-8.10764	0.000154003	GPRC5B	-1083	256	NA	NA	-630	NA	NA	NA	FALSE
Gabrb2	-1.23072	0.198809	-7.61751	0.000220248	GABRB2	NA	NA	NA	1527	NA	NA	NA	NA	TRUE
AW551984	-1.22818	-0.329209	-4.67796	0.00306769	NA	NA	127	NA	NA	NA	NA	NA	NA	FALSE
Celf4	-1.22549	2.20806	-7.91669	0.000176644	CELF4	-87066	107819	NA	NA	NA	NA	NA	NA	FALSE
Chrna7	-1.22318	1.61456	-4.65371	0.00314868	CHRNA7	-13043	NA	323	NA	NA	NA	NA	NA	FALSE
Hhat	-1.22053	1.79146	-9.84354	4.95812e-05	HHAT	-7174	427	NA	NA	NA	NA	NA	NA	FALSE
Nudt10	-1.21788	0.0973326	-6.18161	0.000708701	NUDT11	NA	NA	NA	NA	NA	NA	NA	NA	FALSE
U2	-1.21638	6.13371	-7.18857	0.0003061	NA	NA	NA	NA	NA	NA	NA	NA	NA	FALSE
Gja1	-1.21141	6.10636	-24.9143	1.73884e-07	GJA1	-2949	837	NA	NA	-154	NA	NA	NA	TRUE
Zfp560	-1.20052	0.459144	-5.48275	0.00135213	ZNF560	NA	NA	NA	NA	-47	NA	NA	NA	FALSE
Lef1	-1.18777	0.768919	-4.87898	0.00247973	LEF1	-4237	31662	NA	669	17	NA	NA	NA	TRUE
Btbd11	-1.18704	3.99397	-8.44262	0.000121857	BTBD11	-7535	2096	-36844	122	-177	NA	NA	NA	FALSE
Iqcg	-1.18615	2.62878	-9.83963	4.96978e-05	IQCG	NA	36875	NA	NA	-77	NA	NA	NA	FALSE
4732444A12Rik	-1.18079	1.4014	-4.3319	0.00448491	NA	NA	NA	NA	NA	NA	NA	NA	NA	FALSE
Nkx6-3	-1.17829	3.24462	-4.57022	0.00344635	NA	8064	755	4426	NA	-159	NA	NA	NA	FALSE
Cyct	-1.17311	1.05883	-5.59978	0.00120865	NA	NA	NA	NA	NA	NA	NA	NA	NA	FALSE
Ugt8a	-1.17265	3.1706	-12.3562	1.27539e-05	UGT8	-70018	140	NA	NA	NA	NA	NA	NA	TRUE
Basp1	-1.16649	3.8038	-3.89332	0.00744514	BASP1	81478	34122	48992	NA	257	NA	NA	NA	FALSE
Gpx3	-1.16429	0.805214	-6.87001	0.000394996	GPX3	NA	1510	NA	NA	-192	NA	NA	NA	FALSE
Mtap2	-1.16328	3.83199	-11.8863	1.61062e-05	NA	NA	NA	NA	NA	NA	NA	NA	NA	FALSE
Steap2	-1.15865	1.50367	-4.67341	0.00308272	STEAP2	-4393	NA	NA	NA	47	NA	NA	NA	FALSE
Acot1	-1.15558	1.35641	-5.89311	0.000919	NA	NA	NA	NA	NA	-60	NA	NA	NA	FALSE
Card6	-1.15436	0.730314	-4.4832	0.00379065	CARD6	NA	NA	NA	NA	NA	NA	NA	NA	FALSE
Bhlhe41	-1.13764	1.24147	-7.03696	0.00034519	NA	-1381	NA	1854	NA	-107	NA	NA	NA	FALSE
Igfbp3	-1.1345	3.56333	-5.25075	0.00169742	IGFBP3	-21372	3493	250	NA	NA	NA	NA	NA	FALSE
Fgf17	-1.13209	3.13341	-4.10105	0.00583508	FGF17	-3283	2214	NA	NA	-198	NA	NA	-5113	FALSE
Atp2b4	-1.13142	4.80823	-6.28426	0.000647537	ATP2B4	-11938	8784	NA	NA	NA	NA	NA	NA	FALSE
Lonrf3	-1.13104	1.37572	-5.64428	0.00115869	LONRF3	NA	1782	869	NA	NA	NA	NA	NA	FALSE
Igsf1	-1.12421	-0.478394	-4.47788	0.00381289	IGSF1	NA	NA	NA	NA	NA	NA	NA	NA	FALSE
Lca5	-1.1132	2.16564	-5.14691	0.00188351	LCA5	NA	-6954	NA	NA	38	NA	NA	NA	FALSE
Col11a1	-1.11019	3.43975	-13.2162	8.49454e-06	COL11A1	NA	1484	NA	NA	-198	NA	NA	NA	FALSE
Slc12a8	-1.10632	4.20086	-12.4401	1.22444e-05	SLC12A8	NA	1433	NA	NA	-800	NA	NA	NA	FALSE
Pgrmc1	-1.09828	6.1708	-4.95698	0.00228665	PGRMC1	NA	2065	NA	NA	NA	NA	NA	NA	FALSE
Clip3	-1.09499	1.12261	-6.7652	0.000430449	CLIP3	NA	NA	NA	NA	NA	NA	NA	NA	FALSE
Nudt11	-1.09012	1.85592	-7.51724	0.000237532	NUDT11	-121509	NA	NA	NA	NA	NA	NA	NA	FALSE
Slc40a1	-1.08918	-0.337984	-4.87973	0.00247778	SLC40A1	NA	NA	NA	NA	-373	NA	NA	NA	FALSE
Lrig3	-1.08646	4.70912	-4.83776	0.00258912	LRIG3	-16909	20530	437	NA	NA	NA	NA	NA	FALSE
Ccdc136	-1.07702	3.78616	-15.9538	2.70238e-06	CCDC136	-2582	1271	NA	NA	NA	NA	NA	NA	FALSE
Ttc32	-1.07294	1.58367	-7.6953	0.000207826	TTC32	10968	611	NA	NA	NA	NA	NA	NA	FALSE
Fam49a	-1.06843	1.37373	-5.28579	0.00163938	FAM49A	-84870	102	NA	NA	NA	NA	NA	NA	FALSE
C530008M17Rik	-1.06684	0.547689	-4.45487	0.00391091	NA	-40862	1405	NA	NA	NA	NA	NA	NA	FALSE
Acacb	-1.0559	5.79104	-4.49746	0.00373166	ACACB	-12009	10754	53386	NA	NA	NA	NA	NA	FALSE
Sgcb	-1.05106	1.2273	-5.34803	0.00154175	SGCB	NA	NA	NA	NA	25	NA	NA	NA	FALSE
2018-09-01	-1.04577	5.8439	-17.0894	1.77422e-06	2018-09-01	-6405	NA	736	NA	NA	NA	NA	NA	FALSE
Snta1	-1.04522	3.05453	-9.34224	6.74672e-05	SNTA1	-4479	NA	NA	NA	52	NA	NA	NA	FALSE
Matn2	-1.04483	-0.0916404	-5.83723	0.00096749	MATN2	-21258	4089	NA	156	NA	NA	NA	NA	TRUE
Prdm5	-1.03767	3.12612	-4.214	0.00512498	PRDM5	-13710	NA	NA	NA	NA	NA	NA	NA	FALSE
Slc25a31	-1.03642	-0.608494	-5.18128	0.00181948	SLC25A31	NA	NA	NA	NA	NA	NA	NA	NA	FALSE
Dlg4	-1.03223	0.197215	-4.6962	0.00300834	DLG4	NA	10966	NA	NA	NA	NA	NA	NA	TRUE
Ak3	-1.03011	2.25562	-5.03413	0.00211218	AK3	NA	NA	185	NA	NA	NA	NA	NA	FALSE
AC099934.1	-1.02634	12.8553	-6.16719	0.000717809	NA	NA	NA	NA	NA	NA	NA	NA	NA	FALSE
AC157822.1	-1.02238	12.9981	-6.42558	0.000572922	NA	NA	NA	NA	NA	NA	NA	NA	NA	FALSE
Pirt	-1.02125	3.26259	-4.54504	0.00354225	PIRT	NA	821	NA	NA	-38	NA	NA	NA	FALSE
Grip1	-1.02031	0.165338	-4.27252	0.00479539	GRIP1	NA	-8759	NA	NA	-98	NA	NA	NA	TRUE
Hspa4l	-1.01654	2.39732	-5.1869	0.00180924	HSPA4L	NA	NA	NA	NA	-41	NA	NA	NA	FALSE
1700010I14Rik	-1.0038	0.124675	-4.10798	0.00578845	C6orf118	23408	-18180	NA	NA	-83	-2519	NA	NA	FALSE
Lrrc9	-0.998818	0.714002	-5.76251	0.00103692	NA	NA	4840	NA	NA	-142	NA	NA	NA	FALSE
Crim1	-0.997036	1.46822	-6.94292	0.000372299	CRIM1	-231113	NA	567	NA	-53	NA	NA	NA	FALSE
Nucb2	-0.994685	1.6751	-8.96004	8.61824e-05	NUCB2	330253	NA	NA	NA	NA	NA	NA	36320	FALSE
Plch1	-0.991826	3.14548	-8.06185	0.000159113	PLCH1	240935	8190	NA	NA	NA	NA	NA	NA	FALSE
Acbd7	-0.99122	-0.373925	-4.24342	0.00495625	ACBD7	NA	NA	NA	NA	-141	NA	NA	NA	FALSE
Rhobtb3	-0.988293	3.49151	-9.23902	7.20152e-05	RHOBTB3	NA	37459	NA	NA	-97	NA	NA	NA	FALSE
Snora73b	-0.985256	7.04365	-5.04406	0.00209083	NA	NA	NA	NA	NA	NA	NA	NA	NA	FALSE
Pcyt1b	-0.984073	4.55053	-8.07069	0.000158112	PCYT1B	NA	419	NA	NA	-229	NA	NA	NA	FALSE
S1pr1	-0.983164	3.6292	-6.31803	0.00062875	S1PR1	-3398	NA	NA	NA	29	NA	NA	NA	TRUE
Scarna6	-0.975264	4.03449	-4.21216	0.00513572	NA	NA	NA	NA	NA	NA	NA	NA	NA	FALSE
Gulp1	-0.971953	2.54484	-4.68916	0.00303111	GULP1	NA	1417	NA	NA	-102	NA	NA	NA	FALSE
Cyp39a1	-0.969788	1.27962	-5.09122	0.00199272	CYP39A1	NA	5280	NA	NA	NA	NA	NA	NA	FALSE
Il1rap	-0.968365	1.60042	-4.18189	0.00531655	IL1RAP	NA	NA	NA	NA	-30	NA	NA	NA	FALSE
1700034H14Rik	-0.965029	3.35158	-10.441	3.4965e-05	NA	NA	NA	NA	NA	NA	NA	NA	NA	FALSE
Pde5a	-0.963488	2.70798	-6.40481	0.000583249	PDE5A	NA	1382	149	NA	-316	NA	NA	NA	FALSE
Cryl1	-0.963327	1.30588	-5.57516	0.00123734	CRYL1	-9124	66125	NA	NA	-139	NA	NA	NA	FALSE
Tnfrsf19	-0.962924	4.27503	-15.3216	3.45921e-06	TNFRSF19	-15079	3011	13763	674	71	NA	NA	NA	FALSE
Spin2	-0.956641	1.08796	-6.02281	0.000816742	NA	NA	NA	NA	NA	NA	NA	NA	NA	FALSE
P4ha1	-0.954543	4.9996	-13.0521	9.16151e-06	P4HA1	-26857	31318	NA	NA	-248	NA	NA	NA	FALSE
Eml1	-0.952048	1.47803	-4.44402	0.00395811	EML1	-7298	547	NA	NA	NA	NA	NA	NA	FALSE
SCARNA6	-0.951391	3.33255	-4.69391	0.00301572	NA	NA	NA	NA	NA	NA	NA	NA	NA	FALSE
Chst10	-0.949342	2.36169	-3.96613	0.00683059	CHST10	-6119	23975	NA	144	NA	NA	NA	NA	FALSE
Tek	-0.946676	4.88078	-15.9616	2.69434e-06	TEK	-1142	7389	NA	NA	-44	NA	NA	NA	FALSE
Gm8909	-0.94047	4.61786	-12.044	1.48792e-05	HLA-A	-1100	1905	604	NA	NA	NA	NA	NA	FALSE
B230120H23Rik	-0.939214	4.45225	-4.63672	0.00320684	NA	NA	NA	NA	NA	NA	NA	NA	NA	FALSE
Sfmbt2	-0.937993	5.20668	-7.53388	0.000234559	SFMBT2	-4762	183	NA	NA	NA	NA	NA	NA	FALSE
Epb4.1l3	-0.937072	3.46352	-7.31249	0.000277882	EPB41L3	NA	NA	NA	NA	NA	NA	NA	NA	TRUE
Nap1l3	-0.930879	0.925202	-6.00499	0.000829994	NAP1L3	89112	NA	NA	299	NA	NA	NA	NA	FALSE
Mfsd6	-0.930115	1.61315	-5.35102	0.00153722	MFSD6	-7059	478	NA	NA	NA	NA	NA	NA	FALSE
Mpdz	-0.928891	3.17433	-10.3682	3.64481e-05	MPDZ	-9554	199	NA	NA	NA	NA	NA	NA	FALSE
Magee1	-0.926128	0.723848	-4.56502	0.00346593	MAGEE1	NA	NA	NA	NA	NA	NA	NA	NA	FALSE
Il17d	-0.925213	0.36754	-4.13438	0.00561472	IL17D	21898	824	NA	NA	NA	NA	NA	18914	FALSE
snoU6-77	-0.924874	1.98849	-4.38415	0.00423026	NA	NA	NA	NA	NA	NA	NA	NA	NA	FALSE
Elavl3	-0.923515	0.391018	-5.61022	0.00119671	ELAVL3	NA	1234	NA	NA	NA	NA	NA	-2714	FALSE
Cmpk2	-0.92107	0.603018	-4.09053	0.00590655	CMPK2	19311	NA	363	NA	NA	NA	NA	NA	FALSE
Gm5124	-0.919244	0.548727	-4.97469	0.00224521	NA	NA	NA	NA	NA	NA	NA	NA	NA	FALSE
Tub	-0.914635	2.1861	-4.06508	0.00608364	TUB	NA	NA	NA	NA	69	NA	NA	NA	FALSE
Gm7334	-0.911381	3.58092	-10.328	3.72998e-05	NA	NA	NA	NA	NA	NA	NA	NA	NA	FALSE
Map3k15	-0.906949	1.18305	-5.04797	0.00208249	MAP3K15	NA	NA	NA	NA	NA	NA	NA	NA	FALSE
Perp	-0.905602	2.83859	-5.54851	0.00126927	PERP	14765	NA	NA	NA	62	NA	NA	NA	FALSE
Ifngr1	-0.904469	1.92432	-4.19874	0.00521503	IFNGR1	-1106	NA	NA	NA	NA	NA	NA	NA	FALSE
Ptbp2	-0.903533	5.35127	-15.4336	3.30873e-06	PTBP2	-160885	4794	NA	NA	14	NA	NA	NA	FALSE
Telomerase-vert	-0.903468	4.60792	-3.93503	0.00708592	NA	NA	NA	NA	NA	NA	NA	NA	NA	FALSE
Syce1	-0.903202	3.45833	-10.0319	4.4323e-05	SYCE1	NA	NA	NA	NA	NA	NA	NA	NA	FALSE
Pkd1l2	-0.901295	1.75561	-7.29896	0.000280815	PKD1L2	NA	2762	NA	NA	NA	NA	NA	NA	FALSE
Serpini1	-0.900284	2.7177	-5.50397	0.00132474	SERPINI1	NA	NA	NA	NA	102	NA	NA	NA	FALSE
Elavl4	-0.900181	0.970487	-5.49576	0.00133527	ELAVL4	134267	237	NA	NA	-158	NA	NA	NA	FALSE
Sec14l1	-0.899108	7.07179	-4.10149	0.00583206	SEC14L1	-2339	3711	31953	NA	-191	NA	NA	14545	FALSE
Nup62cl	-0.886899	4.52085	-11.4497	2.01622e-05	NA	NA	NA	NA	NA	NA	NA	NA	NA	FALSE
Slco5a1	-0.885209	4.25869	-7.39839	0.000260066	SLCO5A1	-1686	36779	NA	306	NA	NA	NA	NA	FALSE
Lhpp	-0.884331	4.36143	-4.26832	0.00481822	LHPP	NA	5374	NA	NA	-26	NA	NA	NA	FALSE
Akt3	-0.883128	3.95143	-7.028	0.000347674	AKT3	-9670	26084	NA	NA	NA	NA	NA	NA	FALSE
Ndn	-0.881474	1.72556	-7.38426	0.000262907	NDN	-117285	NA	186	NA	NA	NA	NA	NA	TRUE
2900011O08Rik	-0.879153	3.19189	-4.0677	0.00606519	C16orf45	-6495	-3287	NA	NA	NA	-4697	NA	NA	FALSE
Slc36a4	-0.879106	0.44624	-3.77964	0.00853106	SLC36A4	NA	NA	NA	NA	7	NA	NA	NA	FALSE
Hormad2	-0.878037	2.23195	-6.44534	0.000563291	HORMAD2	-14375	17846	-41824	NA	NA	NA	NA	NA	FALSE
Rps6ka2	-0.877958	6.35376	-4.07298	0.00602809	RPS6KA2	-24166	6404	NA	NA	-192	NA	NA	NA	FALSE
Nbea	-0.876019	3.17218	-6.17803	0.000710952	NBEA	-119219	NA	NA	186	NA	NA	NA	NA	FALSE
Reep1	-0.87499	4.5057	-3.89328	0.00744557	REEP1	NA	763	NA	NA	-55	NA	NA	NA	FALSE
Socs3	-0.874613	6.21102	-11.1518	2.36085e-05	SOCS3	-3496	791	NA	NA	NA	3000	NA	NA	FALSE
Sult6b1	-0.871091	3.18998	-8.40308	0.000125219	SULT6B1	NA	11669	NA	NA	NA	NA	NA	NA	FALSE
Otub2	-0.866829	1.84602	-5.40064	0.00146433	OTUB2	-8626	NA	NA	165	NA	NA	NA	NA	FALSE
2610002M06Rik	-0.866004	2.35683	-4.37971	0.00425124	NA	NA	NA	NA	NA	NA	NA	NA	NA	FALSE
Ntn1	-0.863206	6.74063	-6.54731	0.000516427	NTN1	-1477	3189	1479	NA	-41	NA	NA	NA	TRUE
Pam	-0.851952	2.8412	-4.92995	0.00235157	PAM	NA	3093	NA	NA	NA	NA	NA	NA	FALSE
Zxda	-0.85036	0.560866	-4.17201	0.00537707	NA	-67480	NA	NA	NA	NA	NA	NA	NA	FALSE
Zfp54	-0.840793	1.15513	-4.74638	0.00285157	ZNF541	NA	NA	NA	NA	7	NA	NA	NA	FALSE
Dbn1	-0.836581	2.25531	-4.59421	0.00335769	DBN1	NA	NA	168	NA	NA	NA	NA	NA	FALSE
Gm3512	-0.836191	0.409118	-4.65868	0.00313189	NA	NA	NA	NA	NA	NA	NA	NA	NA	FALSE
Schip1	-0.836052	6.27649	-10.5577	3.27276e-05	SCHIP1	NA	152	NA	126	-905	NA	NA	NA	FALSE
Car12	-0.833628	1.9364	-4.63199	0.00322322	CA12	-1240	644	NA	NA	NA	NA	NA	NA	FALSE
Gpr98	-0.832939	3.47805	-4.18413	0.00530288	GPR98	NA	NA	NA	NA	NA	NA	NA	NA	FALSE
Rps6kl1	-0.831785	3.51537	-5.36473	0.00151668	RPS6KL1	NA	10059	NA	NA	-97	NA	NA	NA	FALSE
Rnf113a1	-0.831002	1.88251	-6.62235	0.00048478	NA	NA	NA	NA	NA	NA	NA	NA	NA	FALSE
Btg3	-0.830461	3.67846	-11.414	2.0543e-05	BTG3	26269	52313	NA	NA	19	NA	NA	NA	FALSE
Amhr2	-0.828193	2.21006	-4.53578	0.00357824	AMHR2	NA	5971	NA	NA	NA	NA	NA	NA	FALSE
Tagln3	-0.825306	1.33157	-4.43617	0.00399264	TAGLN3	-1722	4753	NA	NA	-160	NA	NA	NA	FALSE
Kcnt2	-0.824399	0.861349	-4.30231	0.00463673	KCNT2	-20841	183300	NA	NA	-592	NA	NA	NA	FALSE
Tro	-0.823902	4.24993	-4.47408	0.00382893	TRO	-20075	NA	NA	NA	NA	NA	NA	NA	FALSE
SNORA73	-0.823813	5.38342	-4.53223	0.00359217	NA	NA	NA	NA	NA	NA	NA	NA	NA	FALSE
Serinc5	-0.823352	3.35999	-6.95283	0.00036933	SERINC5	-1228	814	NA	NA	NA	NA	NA	NA	FALSE
AK129341	-0.818783	2.32193	-7.39765	0.000260215	KIAA1377	NA	NA	NA	NA	NA	NA	NA	NA	FALSE
Slc4a5	-0.816965	4.08268	-10.537	3.31113e-05	SLC4A5	-2938	NA	NA	NA	NA	NA	NA	NA	FALSE
Ift57	-0.816402	3.21523	-9.57784	5.82703e-05	IFT57	69276	23823	NA	NA	-1	NA	NA	NA	FALSE
Trim21	-0.815768	1.01469	-5.65421	0.00114785	TRIM21	NA	NA	NA	NA	NA	NA	NA	NA	FALSE
Pls3	-0.814721	6.44807	-8.64439	0.000106234	PLS3	-7846	1030	NA	NA	161	NA	NA	NA	TRUE
Ppt2	-0.810153	1.93797	-5.7518	0.00104734	PPT2	NA	NA	NA	140	239	NA	NA	NA	FALSE
Slc30a1	-0.807634	5.42375	-4.16649	0.0054112	SLC30A1	NA	-9332	NA	NA	41	NA	NA	NA	FALSE
H2-M5	-0.807176	4.90575	-5.30291	0.00161185	NA	NA	NA	814	NA	-200	NA	NA	NA	FALSE
Ccdc39	-0.804885	1.49081	-5.46673	0.00137324	CCDC39	-29408	NA	NA	NA	-80	NA	NA	NA	FALSE
9330159M07Rik	-0.803439	0.874196	-3.67834	0.00964751	NA	NA	NA	NA	NA	-33	NA	NA	NA	FALSE
Ets2	-0.802094	5.13817	-7.75724	0.000198509	ETS2	-15161	NA	NA	NA	-134	NA	NA	NA	FALSE
Plxdc2	-0.80084	1.60745	-4.97875	0.00223583	PLXDC2	NA	41372	NA	NA	-326	NA	NA	NA	FALSE
Snora78	-0.799981	3.52027	-4.32964	0.00449631	NA	NA	NA	NA	NA	NA	NA	NA	NA	FALSE
Ptpmt1	-0.799773	3.44093	-6.23784	0.000674423	PTPMT1	NA	NA	NA	NA	-20	NA	NA	NA	FALSE
AC156953.1	-0.789423	4.3854	-3.89186	0.00745807	NA	NA	NA	NA	NA	NA	NA	NA	NA	FALSE
Ugdh	-0.788885	5.99678	-4.97545	0.00224345	UGDH	-5624	7313	NA	NA	-18	-13188	NA	NA	FALSE
Rsph1	-0.787729	1.67703	-3.74298	0.00891772	RSPH1	-5211	226	NA	NA	NA	NA	NA	22878	FALSE
Elovl4	-0.786636	2.05723	-4.13877	0.0055864	ELOVL4	NA	NA	NA	NA	NA	NA	NA	NA	FALSE
Enah	-0.786624	7.81568	-6.19213	0.000702142	ENAH	-9137	66212	NA	NA	-93	NA	NA	NA	TRUE
Nhedc1	-0.782857	2.4636	-4.37249	0.00428564	NA	NA	NA	NA	NA	NA	NA	NA	NA	FALSE
Itpka	-0.780577	4.80392	-6.3386	0.000617607	ITPKA	NA	2036	NA	NA	-223	NA	NA	NA	FALSE
RP23-349B16.3	-0.780251	0.398328	-4.00599	0.00651811	NA	NA	NA	NA	NA	NA	NA	NA	NA	FALSE
3110003A17Rik	-0.778386	3.68723	-4.40383	0.00413857	NA	NA	NA	NA	NA	NA	NA	NA	NA	FALSE
Serpinb1b	-0.778177	0.678874	-4.16583	0.00541528	NA	NA	7483	NA	NA	NA	NA	NA	NA	FALSE
Yaf2	-0.777455	1.93001	-6.23816	0.000674233	NA	NA	NA	NA	NA	-62	NA	NA	NA	FALSE
Ero1lb	-0.77588	1.76402	-6.4859	0.000544093	ERO1LB	NA	NA	NA	NA	NA	NA	NA	NA	FALSE
Golim4	-0.775586	2.51309	-7.3029	0.000279956	GOLIM4	NA	NA	NA	NA	NA	NA	NA	NA	FALSE
Uprt	-0.773202	1.04961	-3.76618	0.00867076	UPRT	NA	NA	NA	NA	NA	NA	NA	NA	FALSE
Morc4	-0.772375	1.23943	-3.95596	0.00691291	MORC4	NA	NA	NA	NA	NA	NA	NA	NA	FALSE
Pip5kl1	-0.767848	0.260754	-3.74734	0.00887073	PIP5KL1	NA	NA	NA	NA	-266	NA	NA	NA	FALSE
Arxes1	-0.764138	3.08933	-5.61702	0.001189	NA	NA	NA	NA	NA	NA	NA	NA	NA	FALSE
Myo6	-0.763952	4.17877	-12.5212	1.17735e-05	MYO6	-18912	15900	NA	NA	-230	NA	NA	NA	FALSE
Prodh	-0.762842	3.93241	-5.69092	0.00110881	PRODH	-13832	5225	NA	NA	-78	NA	NA	NA	FALSE
Ccnd1	-0.761865	7.2031	-4.63541	0.00321138	CCND1	-2119	NA	274	NA	NA	8073	NA	NA	FALSE
Gm9766	-0.760282	0.968402	-3.88955	0.0074786	NA	NA	NA	NA	NA	NA	NA	NA	NA	FALSE
Tubb6	-0.759501	3.9868	-5.9085	0.000906133	TUBB6	-15593	755	NA	NA	NA	NA	NA	NA	FALSE
Cited2	-0.757063	3.25889	-4.82497	0.00262416	CITED2	-3869	NA	NA	NA	6	NA	NA	NA	FALSE
Uhrf2	-0.753043	5.19052	-12.3117	1.30341e-05	UHRF2	66089	NA	NA	NA	-503	NA	NA	NA	FALSE
6530418L21Rik	-0.751533	1.06442	-4.75916	0.00281312	NA	NA	NA	NA	NA	NA	NA	NA	NA	FALSE
Tspan6	-0.749866	3.73775	-3.78242	0.00850248	TSPAN6	NA	NA	NA	NA	NA	NA	NA	NA	FALSE
Zic2	-0.749233	5.12597	-3.79186	0.0084063	ZIC2	15439	NA	3522	NA	NA	NA	NA	5297	FALSE
Ccdc46	-0.74861	0.164903	-4.53437	0.00358376	NA	NA	NA	NA	NA	NA	NA	NA	NA	FALSE
Irak1bp1	-0.746008	2.75989	-6.49107	0.000541698	IRAK1BP1	NA	NA	272	NA	NA	NA	NA	NA	FALSE
Zfp768	-0.737538	1.72669	-4.45427	0.00391354	ZNF768	NA	NA	NA	NA	-579	NA	NA	NA	FALSE
Hdac8	-0.735857	2.3947	-5.51269	0.00131367	HDAC8	NA	NA	NA	NA	NA	NA	NA	NA	FALSE
Prps2	-0.73394	2.99605	-5.96774	0.000858493	PRPS2	NA	NA	NA	NA	36	NA	NA	NA	FALSE
Slc25a12	-0.732883	4.87159	-11.6212	1.84417e-05	SLC25A12	-9726	157	NA	NA	NA	NA	NA	NA	FALSE
Fam26e	-0.732849	2.80057	-5.38991	0.00147976	FAM26E	NA	NA	142	NA	NA	NA	NA	NA	FALSE
Erap1	-0.732072	1.92759	-3.68956	0.00951628	ERAP1	-22438	119	NA	NA	-334	NA	NA	NA	FALSE
Trp53inp2	-0.72918	2.89484	-4.26586	0.00483165	TP53INP2	NA	190	NA	NA	NA	NA	NA	NA	FALSE
Pim2	-0.726758	2.88797	-6.58995	0.000498166	PIM2	NA	-8118	NA	NA	-173	NA	NA	NA	FALSE
Tmx4	-0.724106	3.41808	-7.27312	0.000286513	TMX4	NA	NA	161	NA	NA	NA	NA	NA	FALSE
Nxt2	-0.722524	5.12714	-5.992	0.000839808	NXT2	NA	NA	NA	NA	145	NA	NA	NA	FALSE
Cisd3	-0.720891	4.27561	-4.05378	0.00616417	CISD3	NA	1672	NA	NA	-259	-2083	NA	NA	FALSE
Gpr125	-0.720645	6.00797	-5.46577	0.00137451	GPR125	NA	NA	NA	NA	NA	NA	NA	NA	FALSE
Snord17	-0.720474	3.80796	-4.86901	0.00250569	NA	18229	3923	NA	NA	NA	NA	NA	NA	FALSE
Tbc1d16	-0.720214	4.49684	-10.2856	3.82226e-05	TBC1D16	NA	8303	17983	NA	NA	NA	NA	NA	FALSE
Gjb4	-0.716275	2.72614	-4.52632	0.00361543	GJB4	9055	NA	NA	NA	-1	NA	NA	NA	FALSE
Dnahc8	-0.713464	6.08286	-4.06546	0.00608099	NA	NA	NA	NA	NA	NA	NA	NA	NA	FALSE
Dsel	-0.713417	3.74884	-6.89139	0.000388181	DSEL	-178268	NA	NA	417	NA	NA	NA	NA	FALSE
Arxes2	-0.713235	3.84984	-4.14937	0.00551869	NA	-19768	NA	NA	NA	NA	NA	NA	NA	FALSE
Stxbp5	-0.712468	2.55709	-4.14508	0.00554601	STXBP5	NA	11480	NA	NA	20	NA	NA	NA	FALSE
Pabpc4l	-0.708278	0.496276	-4.03005	0.00633714	PABPC4L	-38322	NA	NA	NA	NA	NA	NA	NA	FALSE
Lrig1	-0.707994	6.11576	-4.20339	0.00518739	LRIG1	-2695	4072	NA	NA	-194	NA	NA	NA	FALSE
Itgb3bp	-0.70755	2.17021	-5.17972	0.00182232	ITGB3BP	NA	NA	NA	NA	NA	NA	NA	NA	FALSE
Nab1	-0.705751	2.55969	-4.2536	0.00489928	NAB1	-24395	NA	NA	220	NA	43688	NA	NA	FALSE
Pgm2	-0.704294	4.15468	-5.06334	0.00205008	PGM1	79251	394	NA	NA	NA	NA	NA	NA	FALSE
Prrg3	-0.704227	2.17198	-3.71446	0.00923185	PRRG3	NA	NA	NA	NA	-34	NA	NA	NA	FALSE
Sh3bgrl	-0.704087	4.83749	-5.79026	0.00101049	SH3BGRL	NA	NA	NA	NA	-34	NA	NA	NA	FALSE
Vgll3	-0.703008	1.69958	-4.02346	0.00638616	VGLL3	197202	19353	NA	NA	-399	NA	NA	NA	FALSE
Lrrc15	-0.702326	5.34684	-7.85393	0.000184903	LRRC15	-2602	1368	NA	NA	-405	NA	NA	NA	FALSE
Atp8b2	-0.701222	7.90434	-5.79489	0.00100616	ATP8B2	NA	3333	NA	115	NA	NA	NA	NA	FALSE
9430020K01Rik	-0.700327	3.35016	-4.65269	0.00315214	KIAA1462	NA	164	NA	NA	NA	NA	NA	NA	FALSE
Sri	-0.698884	3.58496	-6.50237	0.000536512	SRI	NA	NA	NA	NA	NA	NA	NA	NA	FALSE
D1Ertd622e	-0.698392	2.86625	-6.66716	0.000466934	C5orf30	27431	634	NA	NA	NA	NA	NA	NA	FALSE
Cxx1b	-0.696205	1.58468	-4.67365	0.00308191	FAM127C	NA	NA	NA	NA	NA	NA	NA	NA	FALSE
l7Rn6	-0.695933	5.4333	-13.0095	9.34463e-06	C11orf73	NA	NA	NA	NA	NA	NA	NA	NA	FALSE
Neto2	-0.689236	2.35829	-4.07721	0.00599856	NETO2	NA	NA	NA	NA	NA	NA	NA	NA	FALSE
U1	-0.685841	6.04871	-5.98404	0.000845889	NA	NA	NA	NA	NA	NA	NA	NA	NA	FALSE
Rab13	-0.685524	1.25539	-3.72552	0.00910858	RAB13	NA	NA	NA	NA	NA	NA	NA	NA	TRUE
Dzip1l	-0.685503	2.39813	-5.23005	0.0017328	DZIP1L	NA	32759	NA	126	NA	NA	NA	NA	FALSE
Gnai1	-0.682197	3.99591	-4.79347	0.00271278	GNAI1	-53740	23568	NA	NA	-150	NA	NA	NA	FALSE
9230110C19Rik	-0.680892	0.485819	-4.38403	0.00423082	C11orf70	-12285	7265	NA	NA	NA	NA	NA	NA	FALSE
Acadvl	-0.678865	3.61945	-8.3282	0.000131882	ACADVL	NA	562	NA	NA	NA	NA	NA	NA	FALSE
Stmn2	-0.67755	6.97162	-8.05257	0.000160172	STMN2	NA	1009	NA	NA	NA	NA	NA	NA	FALSE
Stard4	-0.669987	4.59174	-5.9839	0.000845991	STARD4	NA	55920	NA	138	NA	NA	NA	12344	FALSE
Zrsr1	-0.667424	3.82354	-9.21983	7.28993e-05	NA	NA	-22672	1639	467	NA	NA	NA	NA	FALSE
Acsl6	-0.665829	2.60436	-4.52778	0.00360968	ACSL6	NA	-2637	NA	NA	-42	NA	NA	NA	FALSE
Zxdb	-0.665638	1.62774	-4.99234	0.00220475	ZXDB	NA	NA	NA	NA	NA	NA	NA	NA	FALSE
Oat	-0.664259	6.5285	-7.85072	0.000185337	OAT	-9402	NA	NA	NA	30	NA	NA	NA	FALSE
Armcx2	-0.662676	3.95827	-9.39319	6.53444e-05	ARMCX2	-35324	NA	NA	NA	NA	NA	NA	NA	FALSE
Snhg11	-0.658274	3.8514	-6.82603	0.00040945	NA	NA	NA	676	106	NA	NA	NA	10643	FALSE
Gli2	-0.6568	4.97356	-4.78848	0.00272712	GLI2	-1968	971	NA	NA	-107	NA	NA	NA	TRUE
Tmem17	-0.655881	1.7203	-3.91872	0.00722409	TMEM17	-32232	437	NA	NA	NA	NA	NA	NA	FALSE
Ccdc73	-0.655677	1.61234	-4.14811	0.00552666	CCDC73	-7282	NA	NA	NA	NA	NA	NA	NA	FALSE
Nfatc4	-0.65265	4.82197	-9.84129	4.96484e-05	NFATC4	-1431	755	NA	NA	-110	8956	NA	NA	FALSE
Mkx	-0.64881	1.66101	-4.32375	0.00452617	MKX	NA	1254	NA	NA	41	NA	NA	NA	FALSE
Homez	-0.647786	2.33998	-4.199	0.00521349	HOMEZ	NA	279	NA	NA	NA	NA	NA	NA	FALSE
SNORA48	-0.647484	3.72172	-5.5736	0.00123918	NA	NA	NA	NA	NA	NA	NA	NA	NA	FALSE
St3gal3	-0.645329	4.56995	-5.90224	0.000911346	ST3GAL3	NA	51375	NA	NA	-218	-2990	NA	NA	FALSE
Gm10499	-0.642491	5.98518	-7.17877	0.000308468	HLA-A	NA	NA	NA	NA	NA	NA	NA	NA	FALSE
Dnajc3	-0.640352	6.1328	-5.67599	0.0011245	DNAJC3	-3098	391	NA	NA	NA	NA	NA	NA	FALSE
Fkbp7	-0.63971	0.874758	-4.11815	0.00572083	FKBP7	NA	NA	189	NA	-699	NA	NA	NA	FALSE
Lemd2	-0.638676	5.44975	-8.93125	8.78188e-05	LEMD2	-8303	2319	NA	NA	-214	14555	NA	NA	FALSE
Ripk2	-0.638483	3.36118	-6.73056	0.000442957	RIPK2	74753	NA	NA	NA	256	NA	NA	NA	FALSE
Morn4	-0.638151	2.79168	-5.29417	0.00162585	MORN4	NA	NA	NA	NA	NA	NA	NA	NA	FALSE
Itm2a	-0.637108	4.07972	-9.08392	7.95293e-05	ITM2A	NA	NA	NA	NA	NA	NA	NA	NA	FALSE
Ppm1h	-0.635212	2.98882	-5.88606	0.000924959	PPM1H	NA	NA	NA	NA	99	NA	NA	NA	FALSE
RNase_MRP	-0.63229	11.8503	-4.28963	0.00470352	NA	NA	NA	NA	NA	NA	NA	NA	NA	FALSE
Msl3l2	-0.632115	0.727877	-3.84091	0.00792548	NA	-128672	-5411	8431	NA	-35	NA	NA	NA	FALSE
Gpcpd1	-0.631173	3.73438	-7.50094	0.000240486	GPCPD1	NA	NA	NA	NA	-119	NA	NA	NA	FALSE
1500009L16Rik	-0.630163	2.26616	-3.72048	0.00916461	NA	-30593	1718	NA	NA	NA	NA	NA	NA	FALSE
E130012A19Rik	-0.628936	6.76755	-5.98736	0.000843347	C17orf96	NA	NA	NA	NA	NA	NA	NA	NA	TRUE
D16Ertd472e	-0.627478	4.81251	-8.67249	0.000104246	C21orf91	-12331	2681	NA	NA	-104	NA	NA	NA	FALSE
Rcor2	-0.625644	6.29134	-6.82796	0.000408804	RCOR2	-1158	1866	NA	NA	NA	NA	NA	5143	FALSE
Khdrbs3	-0.623773	4.37705	-4.48115	0.00379921	KHDRBS3	-4446	122113	NA	NA	-271	NA	NA	NA	FALSE
Nr3c1	-0.622349	3.20661	-3.74869	0.00885626	NR3C1	-2450	145876	NA	NA	NA	NA	NA	NA	FALSE
Calb2	-0.619943	3.80097	-4.8148	0.00265243	CALB2	37389	15296	NA	NA	-128	NA	NA	NA	FALSE
N6amt2	-0.617022	3.82319	-5.89007	0.000921567	N6AMT2	NA	NA	NA	NA	NA	NA	NA	NA	FALSE
Lpar6	-0.615187	4.03603	-6.59381	0.000496549	LPAR6	NA	-3324	810	NA	NA	NA	NA	NA	FALSE
Ldha	-0.613532	8.37507	-4.17668	0.00534838	LDHA	-5126	2363	NA	NA	353	NA	NA	NA	FALSE
BC016423	-0.613193	6.04902	-9.21877	7.29486e-05	FAM208B	NA	NA	NA	NA	NA	NA	NA	NA	FALSE
Spats1	-0.612357	2.07261	-5.41566	0.00144305	SPATS1	-2157	1210	17698	NA	75	NA	NA	NA	FALSE
Pid1	-0.611202	4.29859	-5.78676	0.00101379	PID1	-48467	1270	NA	NA	-38	NA	NA	NA	FALSE
B3gnt3	-0.608615	3.19365	-4.31708	0.00456027	B3GNT3	NA	1199	NA	NA	NA	NA	NA	NA	FALSE
Zfp280c	-0.608554	4.86108	-10.3304	3.72477e-05	ZNF280C	-1840	NA	NA	NA	NA	NA	NA	NA	TRUE
Gm10391	-0.607529	1.13993	-3.77662	0.00856214	NA	NA	NA	NA	NA	NA	NA	NA	NA	FALSE
Adcy1	-0.607304	3.46399	-6.87804	0.000392421	ADCY1	-162271	1284	662	NA	NA	NA	NA	NA	TRUE
Errfi1	-0.606165	3.6687	-4.56342	0.00347196	ERRFI1	16861	NA	NA	NA	206	NA	NA	NA	FALSE
Cfp	-0.60596	5.22548	-4.58013	0.00340942	CFP	NA	NA	NA	NA	-134	-3339	NA	NA	FALSE
Tnfrsf8	-0.605619	3.81944	-5.28877	0.00163456	TNFRSF8	-8261	8996	NA	NA	NA	NA	NA	NA	FALSE
Ahr	-0.605155	3.9215	-5.21232	0.00176376	AHR	NA	16234	30740	NA	93	NA	NA	NA	FALSE
Hsd17b7	-0.60416	3.93476	-7.48233	0.000243911	HSD17B7	NA	NA	NA	NA	NA	NA	NA	NA	FALSE
Slc30a4	-0.603522	4.21042	-5.20731	0.00177261	SLC30A4	-5643	NA	NA	NA	NA	NA	NA	NA	FALSE
Gm14680	-0.601752	4.75743	-7.08653	0.000331814	SMS	NA	NA	NA	NA	NA	NA	NA	NA	FALSE
Fam102b	-0.600319	1.9723	-3.69006	0.00951048	FAM102B	-3188	NA	NA	NA	88	NA	NA	NA	FALSE
Sms	-0.600067	5.43357	-10.1178	4.21393e-05	SMS	NA	NA	NA	NA	-516	NA	NA	NA	FALSE
Smtnl1	-0.599529	1.77165	-4.39175	0.00419457	SMTNL1	NA	NA	NA	NA	NA	NA	NA	NA	FALSE
Siah2	-0.59408	1.60621	-4.79123	0.0027192	SIAH2	NA	NA	NA	NA	263	NA	NA	NA	TRUE
Rfx3	-0.592401	3.18337	-4.78303	0.00274288	RFX3	-119914	615	214375	NA	-112	NA	NA	NA	FALSE
Stim1	-0.589244	3.0868	-4.19235	0.00525328	STIM1	NA	NA	NA	NA	3	NA	NA	NA	FALSE
Epha7	-0.588491	2.39613	-5.65372	0.00114838	EPHA7	-31268	1865	NA	219	NA	NA	NA	154660	TRUE
Nt5c	-0.585544	3.99899	-6.73092	0.000442822	NT5C	NA	6515	203	NA	NA	NA	NA	904	FALSE
Slc33a1	-0.585319	4.18475	-7.08302	0.000332742	SLC33A1	NA	NA	NA	NA	NA	NA	NA	NA	FALSE
Top2b	-0.584768	6.25389	-5.01474	0.00215456	TOP2B	-51520	15129	NA	206	NA	NA	NA	NA	TRUE
Ankrd37	-0.58179	1.63813	-3.86434	0.00770668	ANKRD37	NA	NA	NA	NA	18	NA	NA	NA	FALSE

## Sheet: Dnttip1 bound up neural
Gene	log2FC_Dnttip1KO_vs_WT	AveExpr_Dnttip1KO_vs_WT	T.Value_Dnttip1KO_vs_WT	P.Value_Dnttip1KO_vs_WT	HomoSapiens.Gene	Intergenic_NearestPeakDistance	Intron_NearestPeakDistance	Exon_NearestPeakDistance	5'UTR_NearestPeakDistance	Promoter-TSS_NearestPeakDistance	3'UTR_NearestPeakDistance	Non-coding_NearestPeakDistance	TTS_NearestPeakDistance	GO_NEURON_DIFFERENTIATION_844
Spry4	1.92419	2.24301	1.19145	0.276797	SPRY4	-24821	NA	NA	NA	-840	NA	NA	NA	FALSE
Id1	1.4101	0.236099	6.35463	0.00060908	ID1	-1021	NA	NA	NA	NA	NA	NA	1312	TRUE
Pvrl1	1.30594	3.86269	8.67664	0.000103956	PVRL1	NA	NA	NA	NA	NA	NA	NA	NA	TRUE
Pacsin1	1.15416	0.283706	4.23737	0.00499041	PACSIN1	-1931	18930	17572	NA	NA	NA	NA	NA	TRUE
Kndc1	1.09648	2.67305	4.47775	0.00381347	KNDC1	NA	11104	NA	NA	NA	NA	NA	NA	TRUE
Chd5	1.08473	2.24875	6.53527	0.000521725	CHD5	NA	614	NA	NA	NA	NA	-5388	NA	TRUE
Sema4a	1.07755	1.68619	4.877	0.00248485	SEMA4A	-12043	NA	NA	NA	NA	NA	NA	NA	TRUE
Sema3b	1.01181	4.28829	3.84484	0.0078883	SEMA3B	-3376	339	NA	215	-24	NA	NA	NA	TRUE
Epha4	0.93101	7.48866	7.96669	0.000170367	EPHA4	-1517	323	NA	NA	-785	NA	NA	NA	TRUE
Nkx6-2	0.914509	4.98429	7.00274	0.000354787	NKX6-2	-3625	5751	349	NA	NA	NA	NA	2953	TRUE
Sema6c	0.905929	4.71619	4.82655	0.00261981	SEMA6C	12379	1722	8141	NA	-24	NA	275	NA	TRUE
Lamb2	0.864733	6.29818	11.1528	2.35963e-05	LAMB2	NA	NA	NA	NA	-950	NA	NA	NA	TRUE
Satb2	0.844407	1.88064	4.77723	0.00275976	SATB2	NA	15782	NA	NA	NA	NA	NA	NA	TRUE
Notch1	0.817027	5.65847	4.24968	0.00492113	NOTCH1	NA	1723	NA	NA	NA	NA	NA	NA	TRUE
Etv1	0.802762	2.51567	6.31212	0.000631995	ETV1	-1194	791	NA	115	NA	NA	NA	NA	TRUE
Csnk1e	0.795276	5.55948	3.84451	0.00789145	CSNK1E	-6204	2476	NA	NA	-118	NA	NA	NA	TRUE
Unc5b	0.752094	6.1199	13.6085	7.11504e-06	UNC5B	-36802	865	NA	NA	8	NA	NA	NA	TRUE
Fry	0.751946	5.46636	5.35121	0.00153694	FRY	-14211	92240	NA	NA	-251	NA	NA	NA	TRUE
Sdc4	0.706962	8.12248	4.91099	0.00239835	SDC4	-2188	1412	NA	NA	-262	NA	NA	NA	TRUE
Fzd10	0.702766	5.85718	4.72825	0.00290713	FZD10	37814	NA	NA	NA	NA	2372	NA	NA	TRUE
Cacna1a	0.70082	5.38012	4.16993	0.00538987	CACNA1A	-57430	13856	NA	NA	41	NA	NA	NA	TRUE
Nek3	0.667441	3.88646	4.61873	0.00326973	NEK3	NA	16406	NA	NA	20	NA	NA	NA	TRUE
Cdh1	0.633158	9.26589	14.3306	5.19794e-06	CDH1	-3691	534	NA	NA	NA	NA	NA	NA	TRUE
Lrfn1	0.593435	2.40175	3.93765	0.00706397	LRFN1	NA	NA	NA	NA	67	NA	NA	-4515	TRUE

## Sheet: Dnttip1 bound down neural
Gene	log2FC_Dnttip1KO_vs_WT	AveExpr_Dnttip1KO_vs_WT	T.Value_Dnttip1KO_vs_WT	P.Value_Dnttip1KO_vs_WT	HomoSapiens.Gene	Intergenic_NearestPeakDistance	Intron_NearestPeakDistance	Exon_NearestPeakDistance	5'UTR_NearestPeakDistance	Promoter-TSS_NearestPeakDistance	3'UTR_NearestPeakDistance	Non-coding_NearestPeakDistance	TTS_NearestPeakDistance	GO_NEURON_DIFFERENTIATION_844
En1	-4.24524	-1.72945	-14.0213	5.93507e-06	EN1	27967	2661	935	NA	44	NA	NA	NA	TRUE
Nnat	-4.07876	-1.15523	-7.16781	0.000311142	NNAT	-37311	1372	NA	NA	NA	NA	NA	NA	TRUE
Slit3	-3.78917	-0.762156	-8.53647	0.000114283	SLIT3	-7922	1560	NA	NA	-119	NA	NA	NA	TRUE
Foxn4	-3.1654	0.124568	-11.7023	1.76884e-05	FOXN4	-2156	NA	25472	NA	-405	NA	NA	NA	TRUE
Trpc6	-2.55953	0.494394	-4.45215	0.00392268	TRPC6	-81036	NA	NA	NA	NA	NA	NA	NA	TRUE
Gsx2	-2.37664	-1.35934	-7.4858	0.000243268	GSX2	4147	NA	NA	NA	-783	NA	NA	NA	TRUE
Alcam	-2.3555	1.49469	-4.48428	0.00378614	ALCAM	-23161	2329	NA	NA	-105	NA	NA	NA	TRUE
Wnt7b	-2.32762	-0.0875739	-6.51751	0.000529648	WNT7B	-29037	5207	NA	NA	-106	NA	NA	NA	TRUE
Prex2	-1.94288	0.872448	-10.2608	3.87733e-05	PREX2	66199	-12700	NA	NA	NA	NA	NA	NA	TRUE
Nrp2	-1.82949	4.45172	-4.68559	0.0030427	NRP2	-1996	3515	NA	NA	87	NA	NA	NA	TRUE
Nrcam	-1.62236	2.44213	-5.53472	0.00128615	NRCAM	-3961	9612	NA	199	NA	NA	NA	NA	TRUE
Nfasc	-1.57212	0.467619	-6.21698	0.000686917	NFASC	-7323	3593	NA	NA	51	NA	NA	NA	TRUE
Pak3	-1.5443	0.0292801	-4.52535	0.00361931	PAK3	-35527	-10606	NA	NA	NA	NA	NA	NA	TRUE
Fgfr2	-1.53309	1.93795	-12.153	1.40935e-05	FGFR2	-102200	1814	NA	561	NA	NA	NA	NA	TRUE
Cend1	-1.3932	-0.549045	-4.31651	0.0045632	CEND1	NA	NA	NA	NA	-8	NA	NA	NA	TRUE
Ncam1	-1.36977	5.0058	-24.5902	1.88558e-07	NCAM1	-30769	1728	NA	273	NA	NA	NA	NA	TRUE
Gpc1	-1.29916	4.19716	-11.7116	1.76043e-05	GPC1	-56701	1121	NA	NA	64	NA	NA	NA	TRUE
Pcsk9	-1.2384	2.84557	-3.69279	0.00947882	PCSK9	NA	NA	27485	NA	NA	NA	NA	NA	TRUE
Gabrb2	-1.23072	0.198809	-7.61751	0.000220248	GABRB2	NA	NA	NA	1527	NA	NA	NA	NA	TRUE
Gja1	-1.21141	6.10636	-24.9143	1.73884e-07	GJA1	-2949	837	NA	NA	-154	NA	NA	NA	TRUE
Lef1	-1.18777	0.768919	-4.87898	0.00247973	LEF1	-4237	31662	NA	669	17	NA	NA	NA	TRUE
Ugt8a	-1.17265	3.1706	-12.3562	1.27539e-05	UGT8	-70018	140	NA	NA	NA	NA	NA	NA	TRUE
Matn2	-1.04483	-0.0916404	-5.83723	0.00096749	MATN2	-21258	4089	NA	156	NA	NA	NA	NA	TRUE
Dlg4	-1.03223	0.197215	-4.6962	0.00300834	DLG4	NA	10966	NA	NA	NA	NA	NA	NA	TRUE
Grip1	-1.02031	0.165338	-4.27252	0.00479539	GRIP1	NA	-8759	NA	NA	-98	NA	NA	NA	TRUE
S1pr1	-0.983164	3.6292	-6.31803	0.00062875	S1PR1	-3398	NA	NA	NA	29	NA	NA	NA	TRUE
Epb4.1l3	-0.937072	3.46352	-7.31249	0.000277882	EPB41L3	NA	NA	NA	NA	NA	NA	NA	NA	TRUE
Ndn	-0.881474	1.72556	-7.38426	0.000262907	NDN	-117285	NA	186	NA	NA	NA	NA	NA	TRUE
Ntn1	-0.863206	6.74063	-6.54731	0.000516427	NTN1	-1477	3189	1479	NA	-41	NA	NA	NA	TRUE
Pls3	-0.814721	6.44807	-8.64439	0.000106234	PLS3	-7846	1030	NA	NA	161	NA	NA	NA	TRUE
Enah	-0.786624	7.81568	-6.19213	0.000702142	ENAH	-9137	66212	NA	NA	-93	NA	NA	NA	TRUE
Rab13	-0.685524	1.25539	-3.72552	0.00910858	RAB13	NA	NA	NA	NA	NA	NA	NA	NA	TRUE
Gli2	-0.6568	4.97356	-4.78848	0.00272712	GLI2	-1968	971	NA	NA	-107	NA	NA	NA	TRUE
E130012A19Rik	-0.628936	6.76755	-5.98736	0.000843347	C17orf96	NA	NA	NA	NA	NA	NA	NA	NA	TRUE
Zfp280c	-0.608554	4.86108	-10.3304	3.72477e-05	ZNF280C	-1840	NA	NA	NA	NA	NA	NA	NA	TRUE
Adcy1	-0.607304	3.46399	-6.87804	0.000392421	ADCY1	-162271	1284	662	NA	NA	NA	NA	NA	TRUE
Siah2	-0.59408	1.60621	-4.79123	0.0027192	SIAH2	NA	NA	NA	NA	263	NA	NA	NA	TRUE
Epha7	-0.588491	2.39613	-5.65372	0.00114838	EPHA7	-31268	1865	NA	219	NA	NA	NA	154660	TRUE
Top2b	-0.584768	6.25389	-5.01474	0.00215456	TOP2B	-51520	15129	NA	206	NA	NA	NA	NA	TRUE
